# Supplementary material for: The dynamic landscape of fission yeast meiosis alternative-splice isoforms
Source: PubMed Central journal article supplement — Genome Res. 2017 Jan;27(1):145–56. doi: 10.1101/gr.208041.116 (PMC5204338; doi:10.1101/gr.208041.116), 2017-01
Supplement: supp_gr.208041.116_Supplemental_Fig_S1.pdf [file supp_gr.208041.116_Supplemental_Fig_S1.pdf]

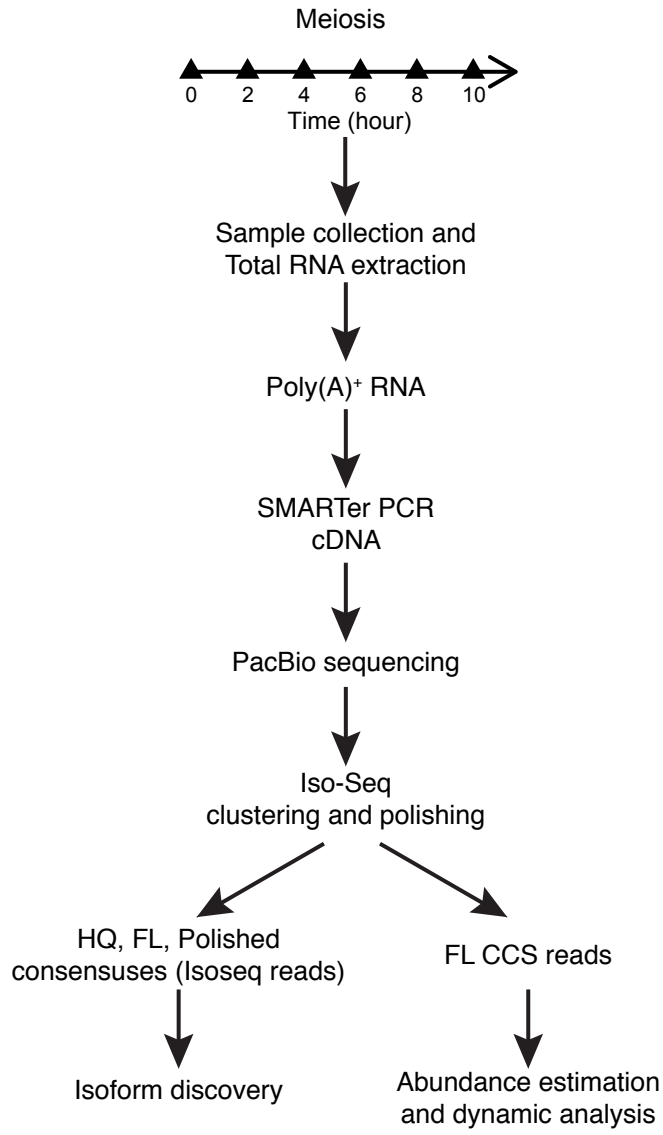

Supplemental Figure S1. A workflow to characterize the diversity and dynamics of transcriptomes in *S. pombe* meiosis.
