# Supplementary material for: The dynamic landscape of fission yeast meiosis alternative-splice isoforms
Source: PubMed Central journal article supplement — Genome Res. 2017 Jan;27(1):145–56. doi: 10.1101/gr.208041.116 (PMC5204338; doi:10.1101/gr.208041.116), 2017-01
Supplement: supp_gr.208041.116_Supplemental_Fig_S2.pdf [file supp_gr.208041.116_Supplemental_Fig_S2.pdf]

**A**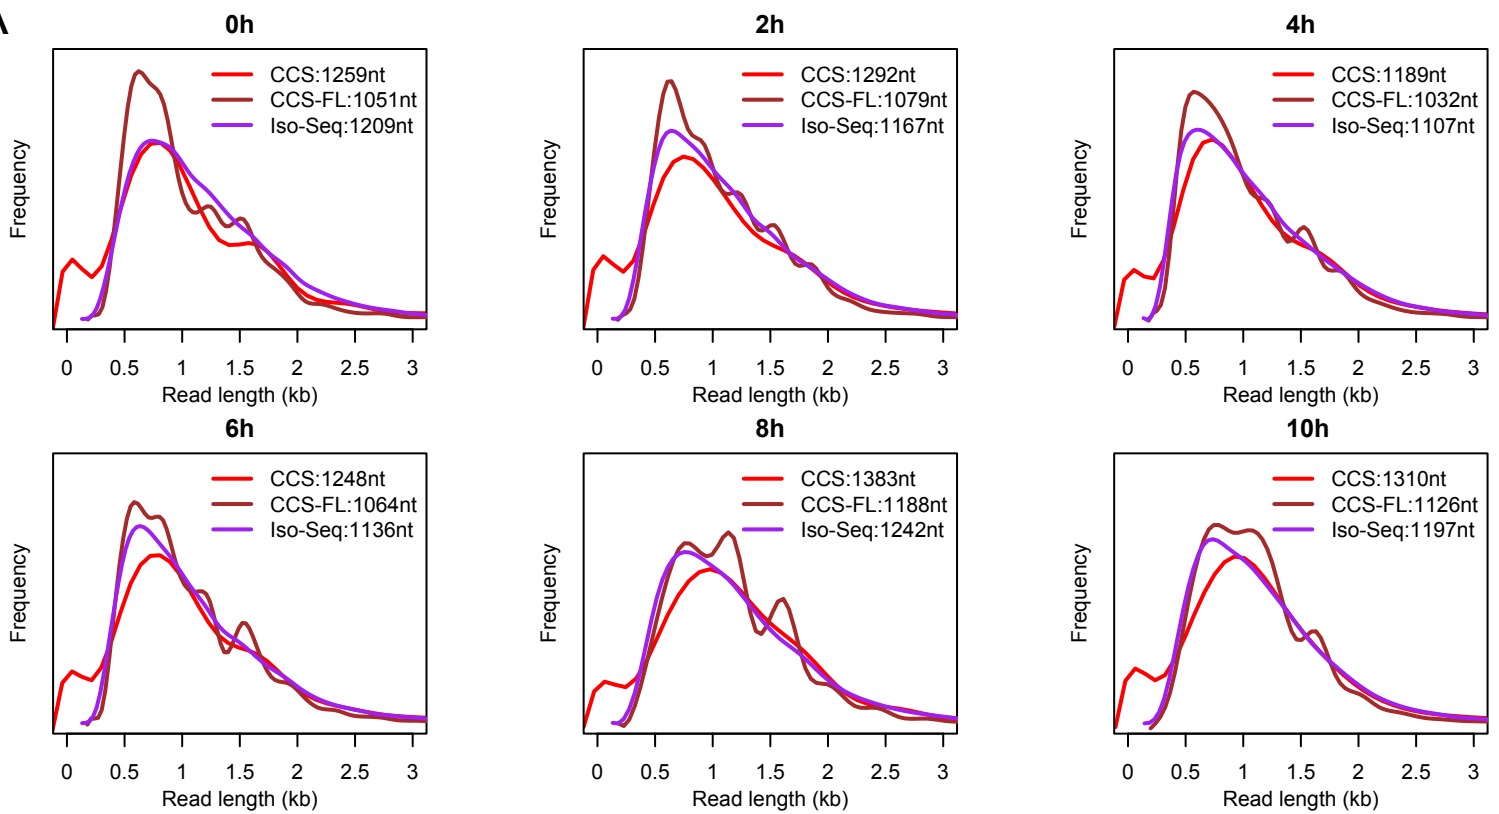**B**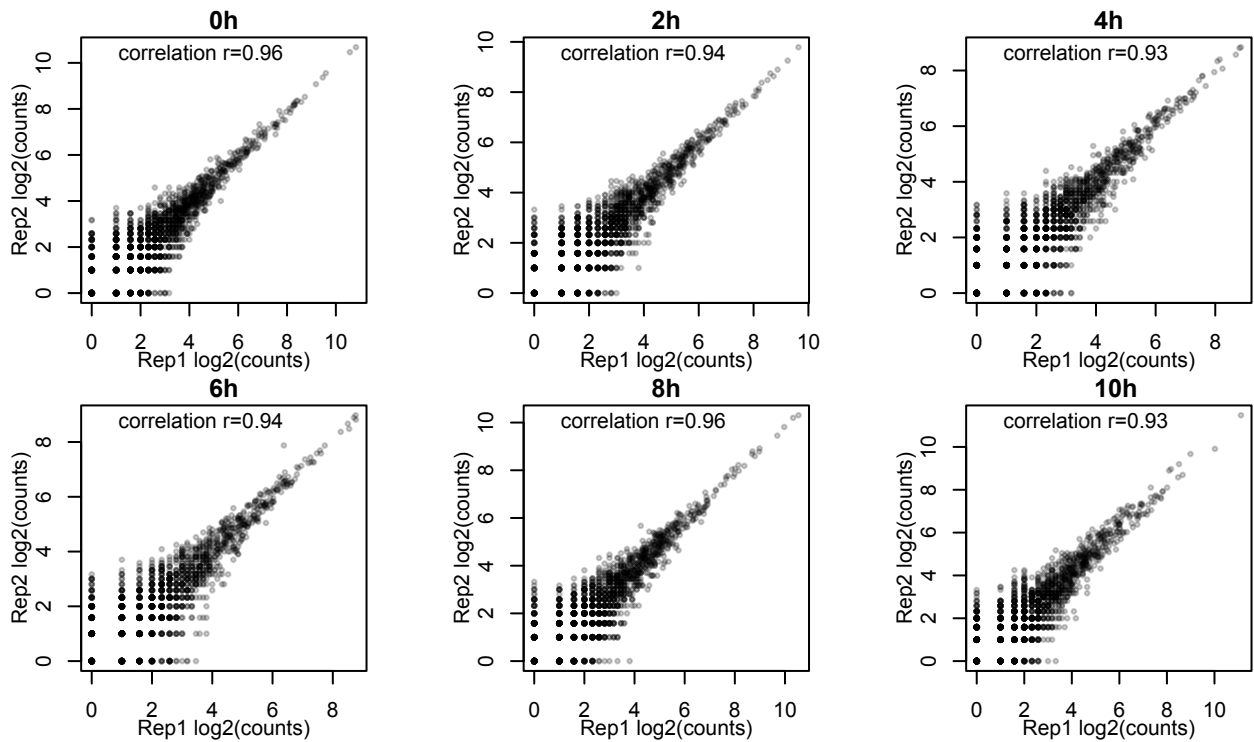**C**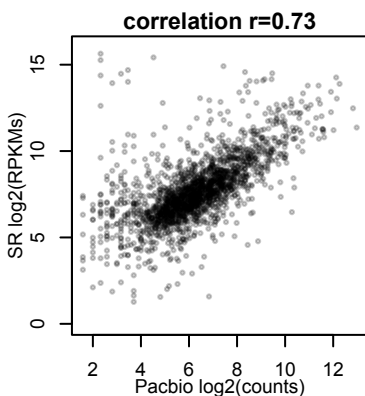

Supplemental Figure S2. Characteristics of PacBio sequencing. (A) Length distribution of CCS, CCS-FL and Iso-Seq reads at the 6 different time points. (B) Scatter plots of log<sub>2</sub> transformed CCS-FL read counts from replicates at 6 time points with cutoff of 5. Pearson correlation was shown in each plot. (C) Scatter plot showing a strong Pearson correlation between PacBio CCS-FL read counts and RPKMs from Illumina-based short read RNA-seq (Duncan et al. 2014) at 0 h of meiosis.
