# Supplementary material for: The dynamic landscape of fission yeast meiosis alternative-splice isoforms
Source: PubMed Central journal article supplement — Genome Res. 2017 Jan;27(1):145–56. doi: 10.1101/gr.208041.116 (PMC5204338; doi:10.1101/gr.208041.116), 2017-01
Supplement: supp_gr.208041.116_Supplemental_Fig_S3.pdf [file supp_gr.208041.116_Supplemental_Fig_S3.pdf]

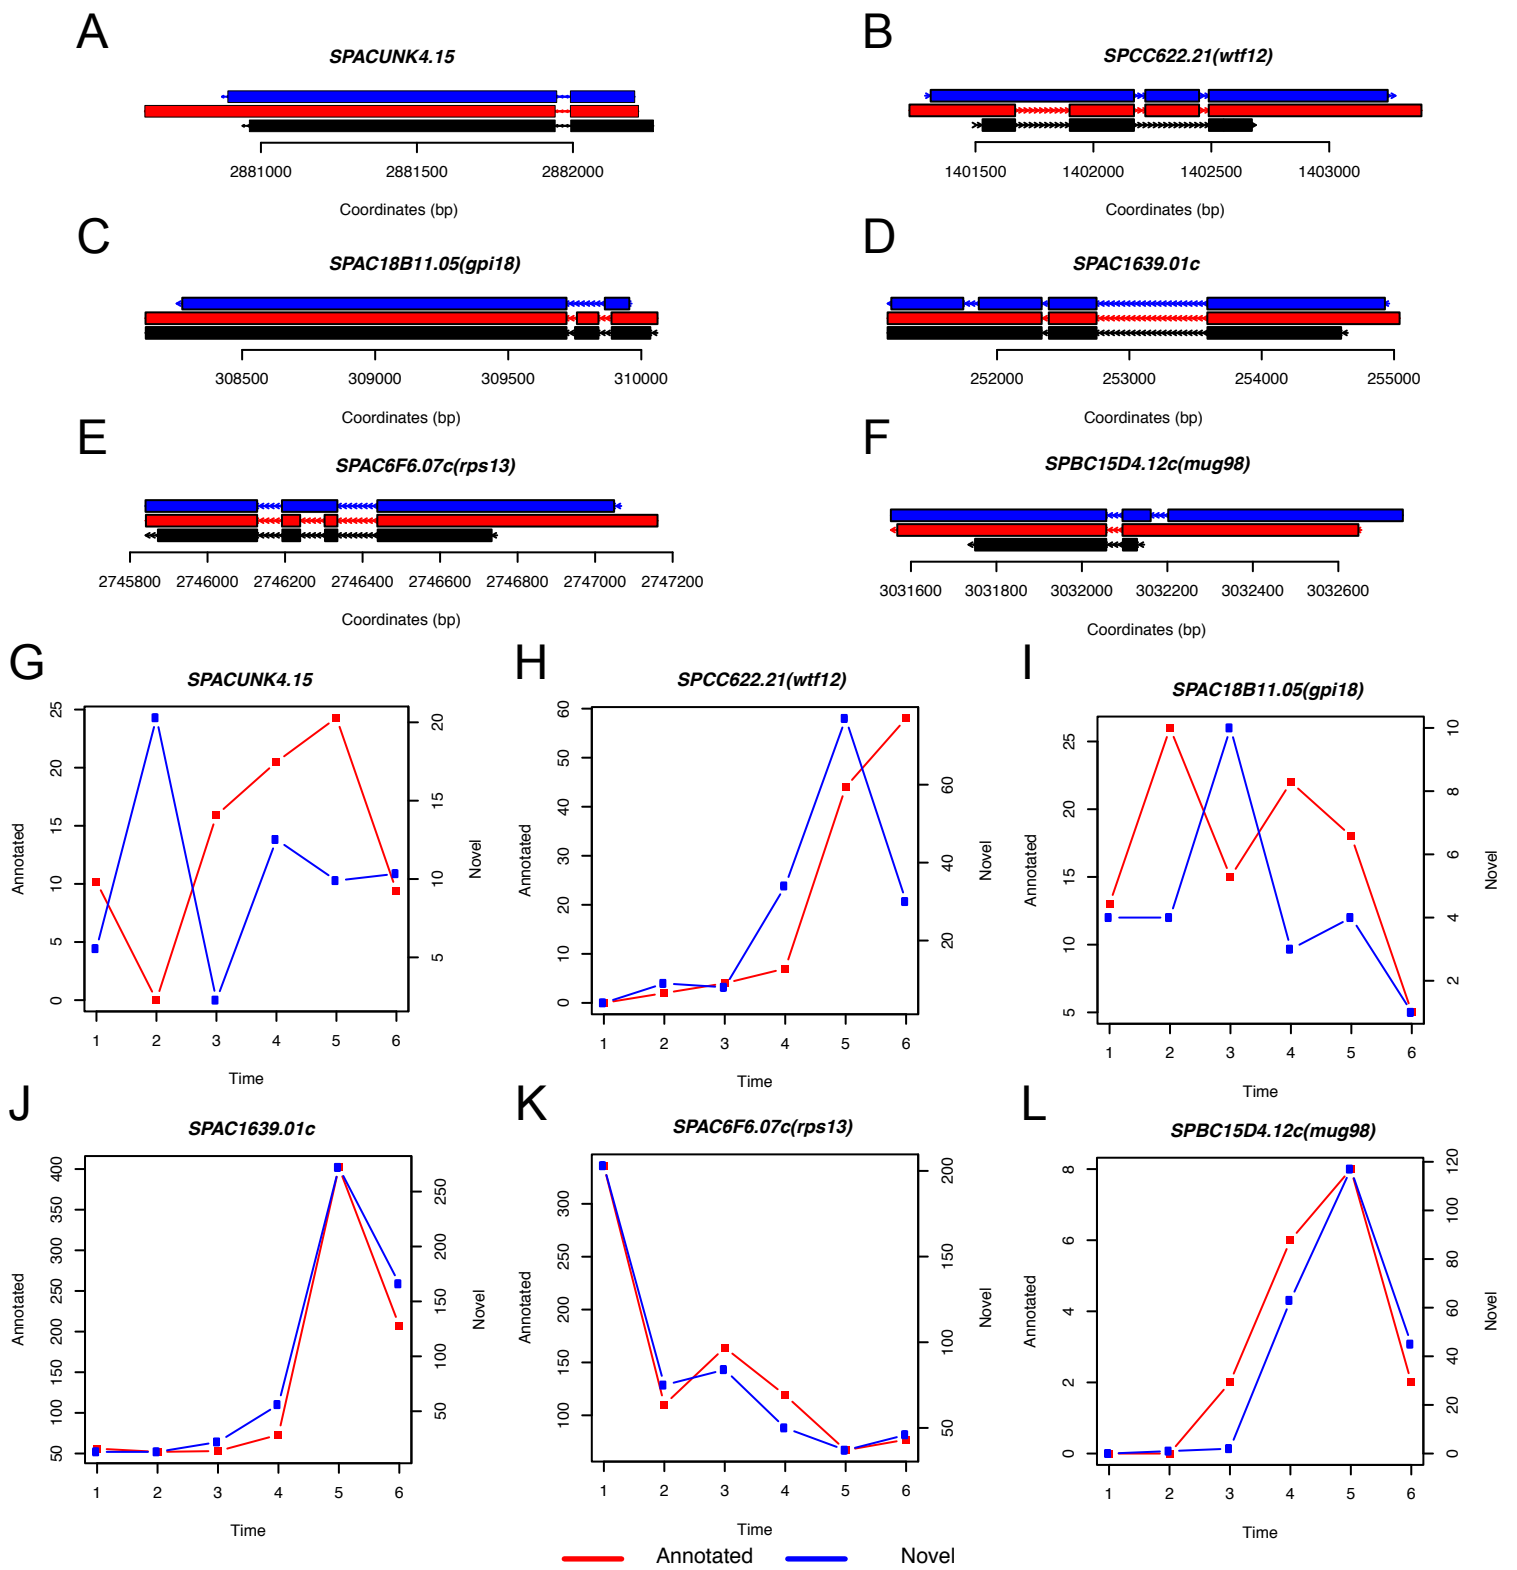

Supplemental Figure S3. Examples of alternative splicing. (A-F) shows 6 different types of alternative splicing: novel splicing donor or acceptor, exon inclusion, exon skipping, intron in exon, intron retention, novel exon. (G-L) shows the temporal patterns of the annotated and alternative isoforms.
