# Supplementary material for: The dynamic landscape of fission yeast meiosis alternative-splice isoforms
Source: PubMed Central journal article supplement — Genome Res. 2017 Jan;27(1):145–56. doi: 10.1101/gr.208041.116 (PMC5204338; doi:10.1101/gr.208041.116), 2017-01
Supplement: supp_gr.208041.116_Supplemental_Fig_S4.pdf [file supp_gr.208041.116_Supplemental_Fig_S4.pdf]

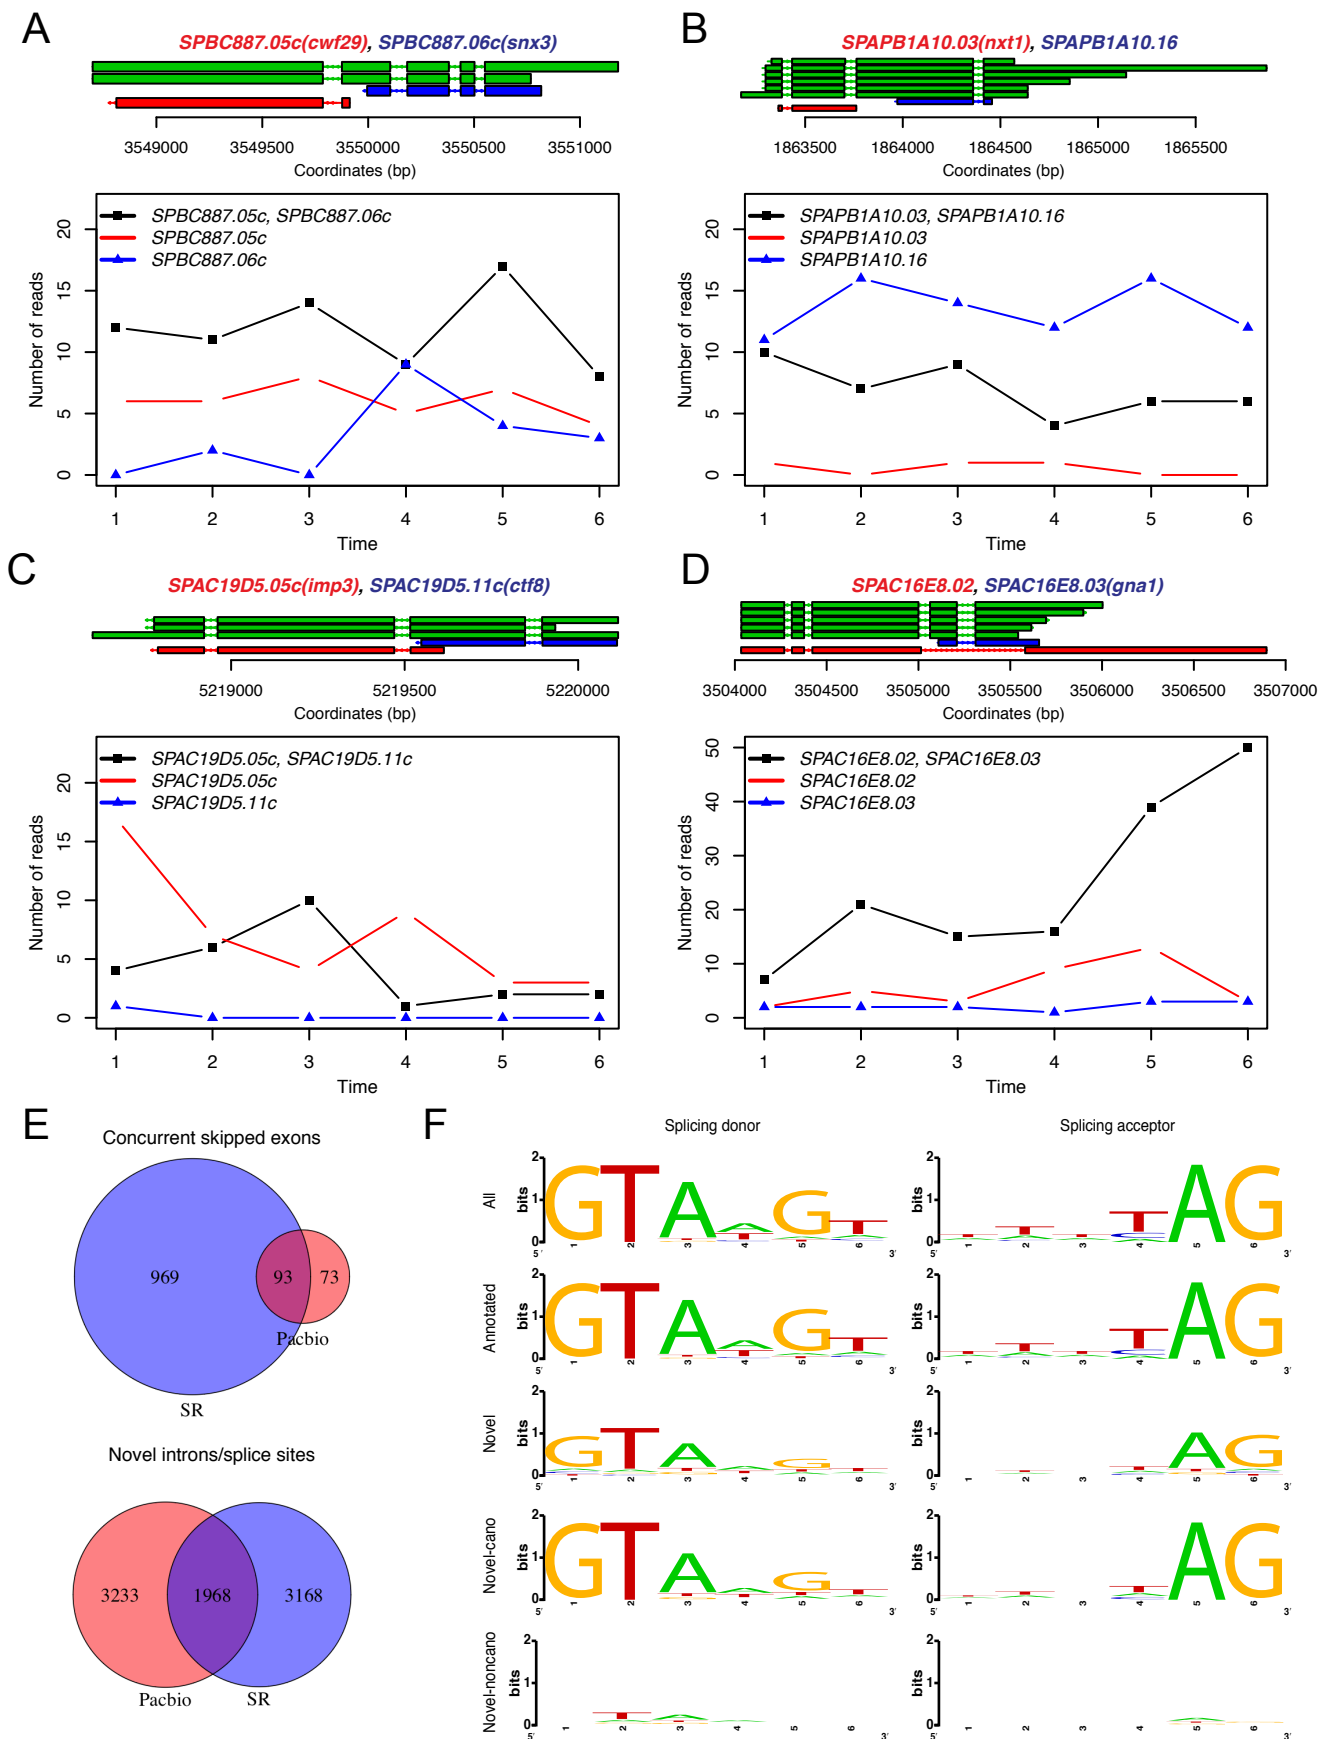

Supplemental Figure S4. Landscape of AS detected by PacBio and short-read sequencing. (A-D) Structures and dynamics of read-through transcripts. The top panels show the structures of isoforms and the bottom panel shows the dynamics of read-through transcripts and corresponding individual transcripts. (E) Venn graphs showing the comparison between AS events detected by PacBio sequencing and short-read RNA-seq in meiosis. (F) The hexamer sequences of 5' and 3' splicing sites for introns supported by reads (All), introns annotated in PomBase v2.29 (annotated), novel introns implied by reads (novel), novel introns with canonical dinucleotides (Novel-cano), and novel introns with noncanonical dinucleotides (Novel-noncano).
