# Supplementary material for: The dynamic landscape of fission yeast meiosis alternative-splice isoforms
Source: PubMed Central journal article supplement — Genome Res. 2017 Jan;27(1):145–56. doi: 10.1101/gr.208041.116 (PMC5204338; doi:10.1101/gr.208041.116), 2017-01
Supplement: supp_gr.208041.116_Supplemental_Fig_S5.pdf [file supp_gr.208041.116_Supplemental_Fig_S5.pdf]

**A**

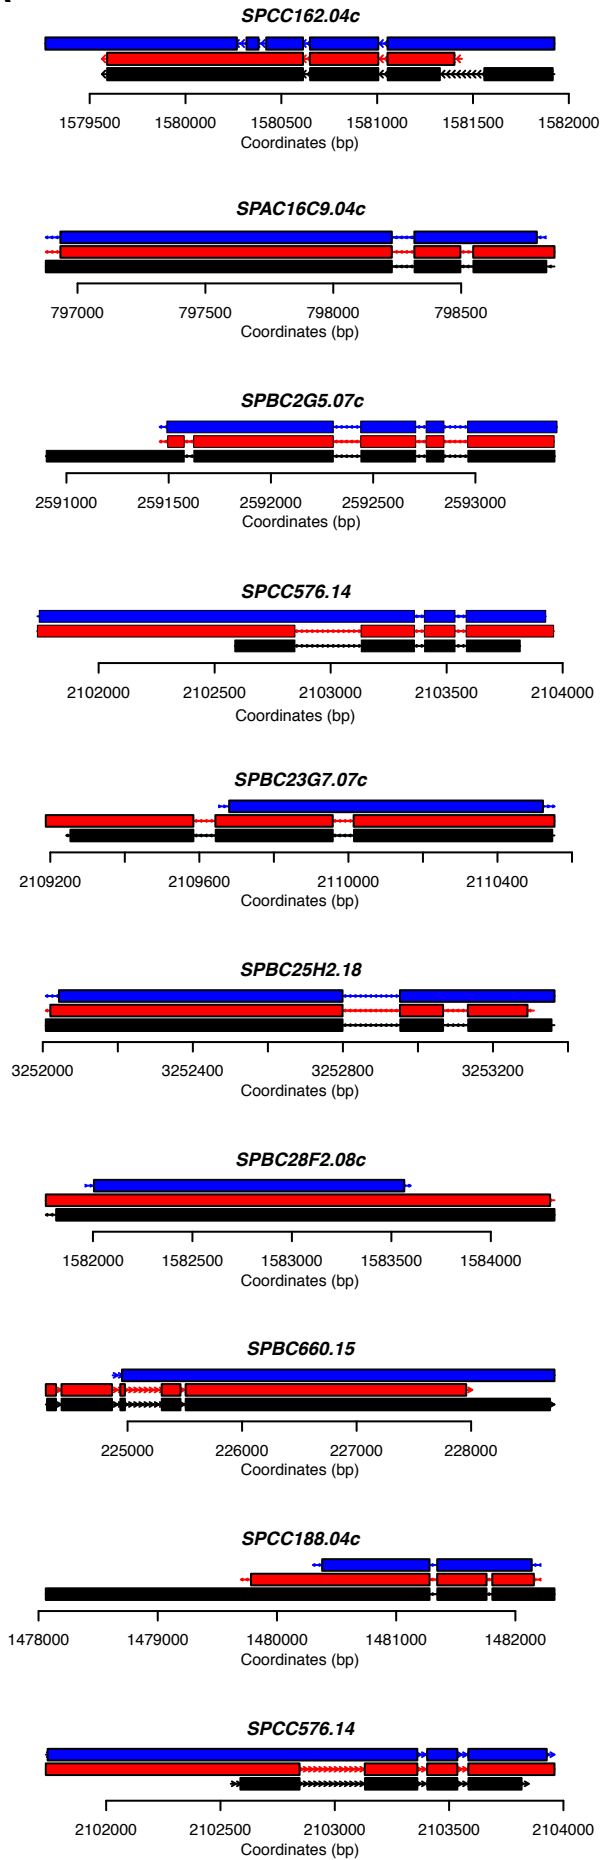

**B**

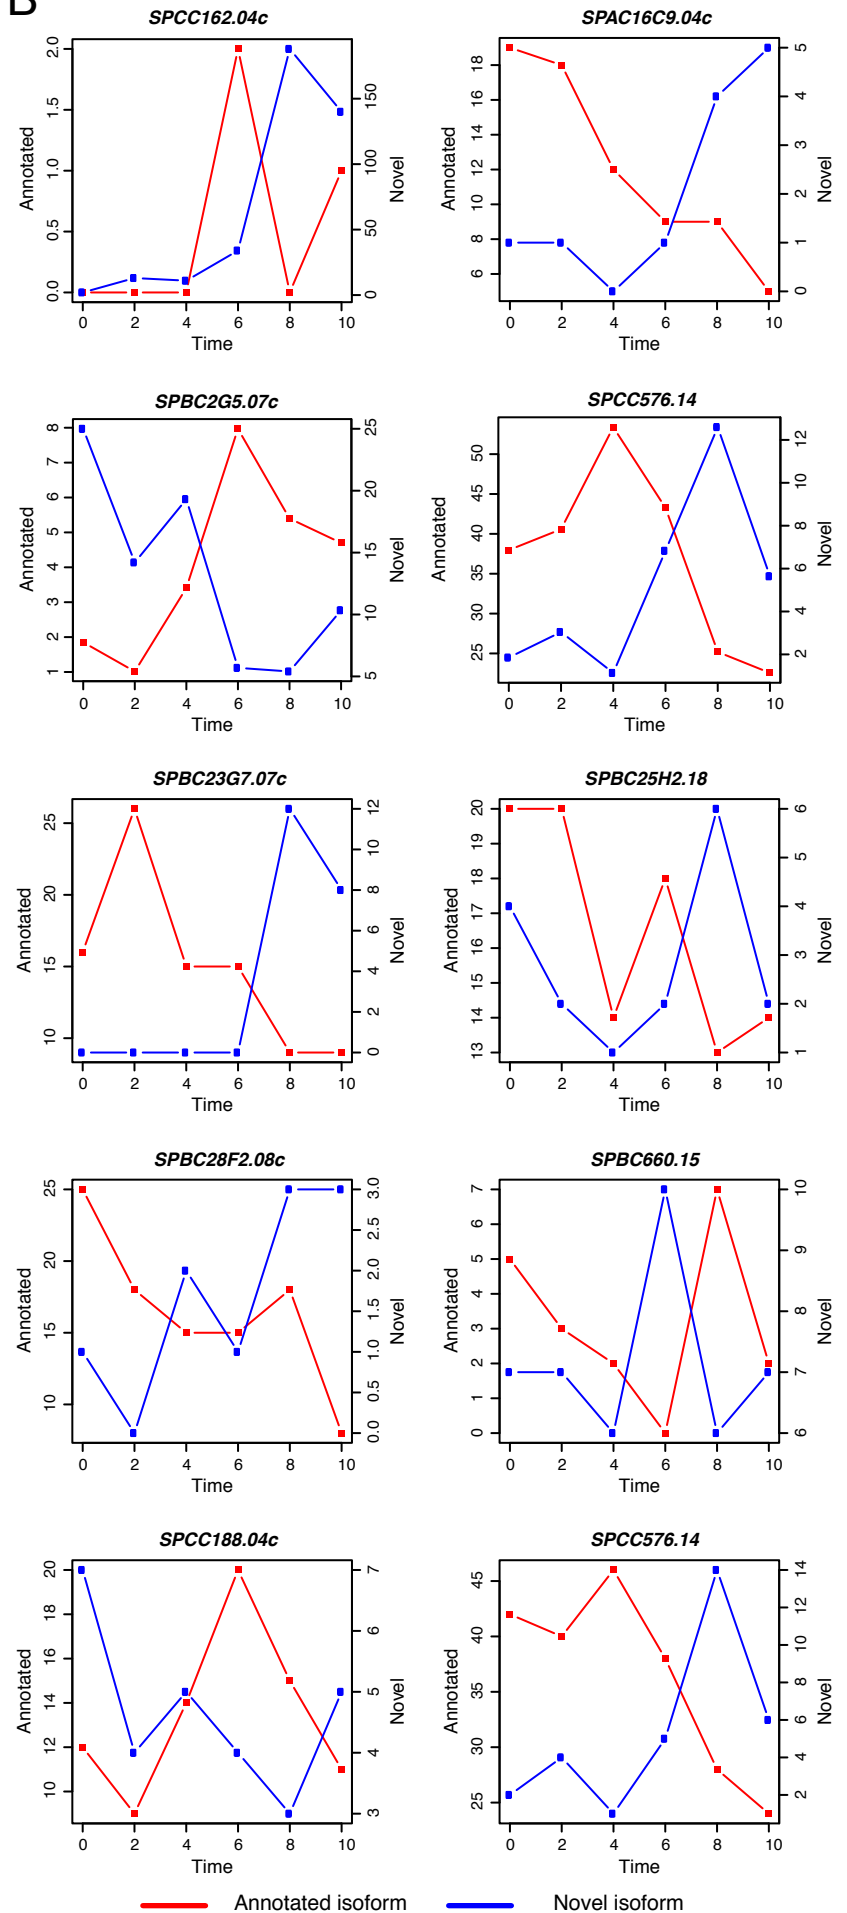

Supplemental Figure S5. Examples of anticorrelated isoforms in meiosis. (A) shows the exon-intron structures of the examples. (B) shows the temporal patterns of the annotated and alternative isoforms.
