# Supplementary material for: The dynamic landscape of fission yeast meiosis alternative-splice isoforms
Source: PubMed Central journal article supplement — Genome Res. 2017 Jan;27(1):145–56. doi: 10.1101/gr.208041.116 (PMC5204338; doi:10.1101/gr.208041.116), 2017-01
Supplement: supp_gr.208041.116_Supplemental_Fig_S6.pdf [file supp_gr.208041.116_Supplemental_Fig_S6.pdf]

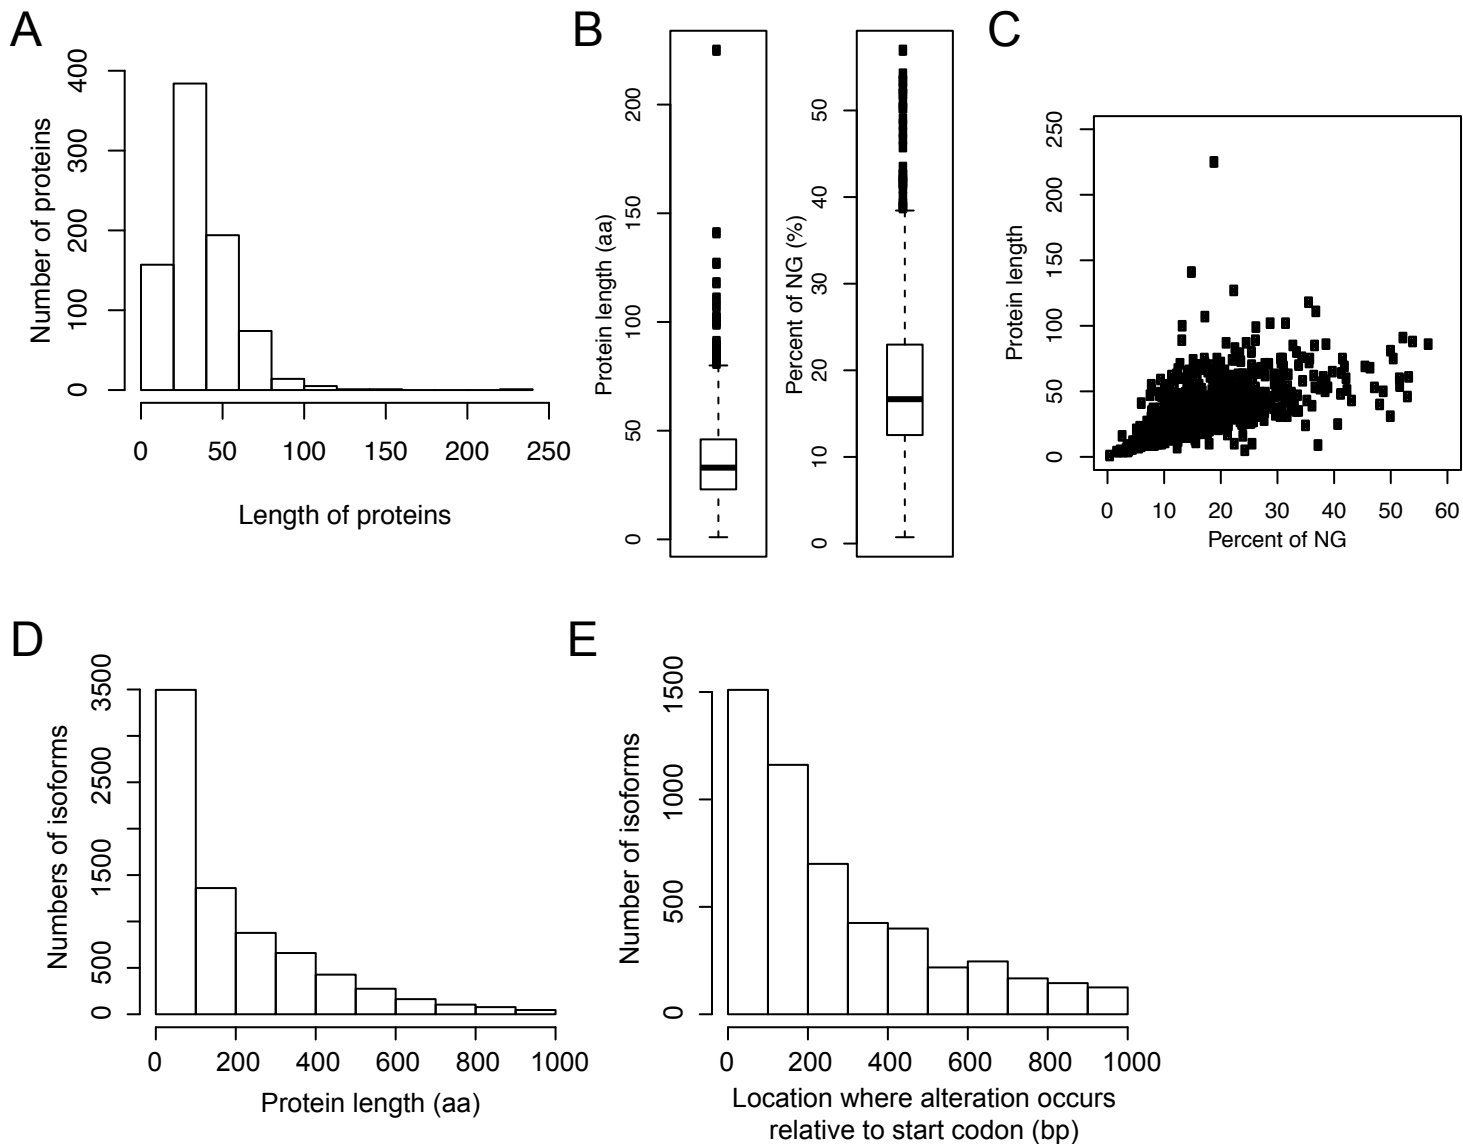

Supplemental Figure S6. Prediction of translational products from newly discovered transcripts. (A) Distribution of protein length predicted from novel genes. (B) Boxplots showing the length of protein and the percent of novel genes used for translation. (C) Scatterplot of the percent of new genes used for translation and the length of proteins. (D) Histogram showing the distribution of protein length from novel AS isoforms. (E) Histogram showing the locations where alterations from AS isoforms occur relative to annotated start codon.
