# Supplementary material for: The dynamic landscape of fission yeast meiosis alternative-splice isoforms
Source: PubMed Central journal article supplement — Genome Res. 2017 Jan;27(1):145–56. doi: 10.1101/gr.208041.116 (PMC5204338; doi:10.1101/gr.208041.116), 2017-01
Supplement: supp_gr.208041.116_Supplemental_Fig_S8.pdf [file supp_gr.208041.116_Supplemental_Fig_S8.pdf]

A

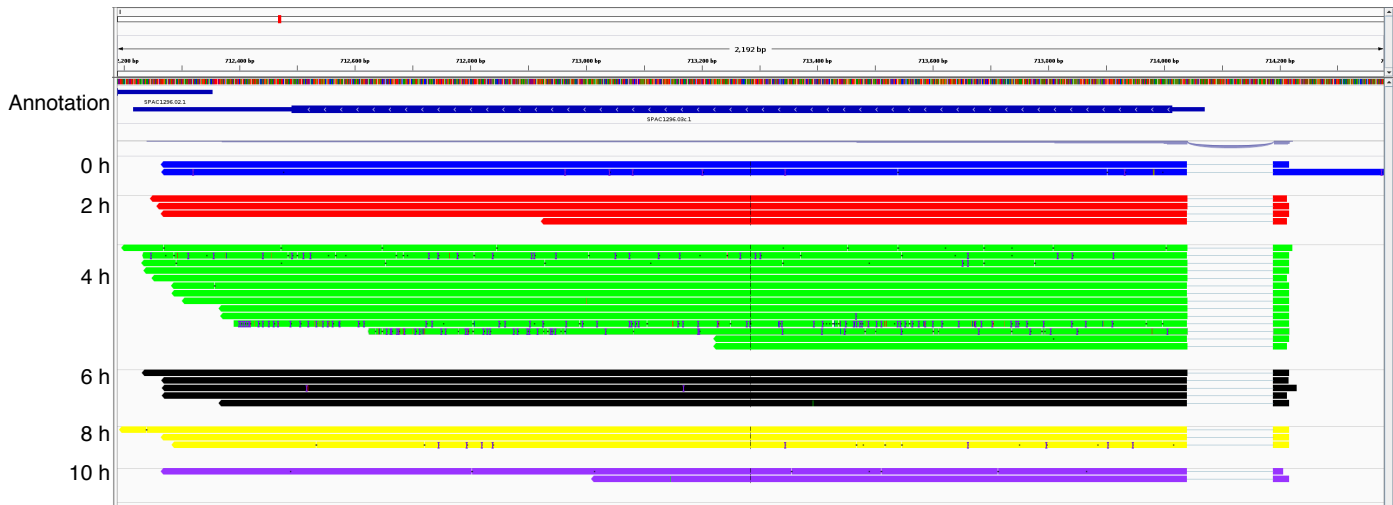

B

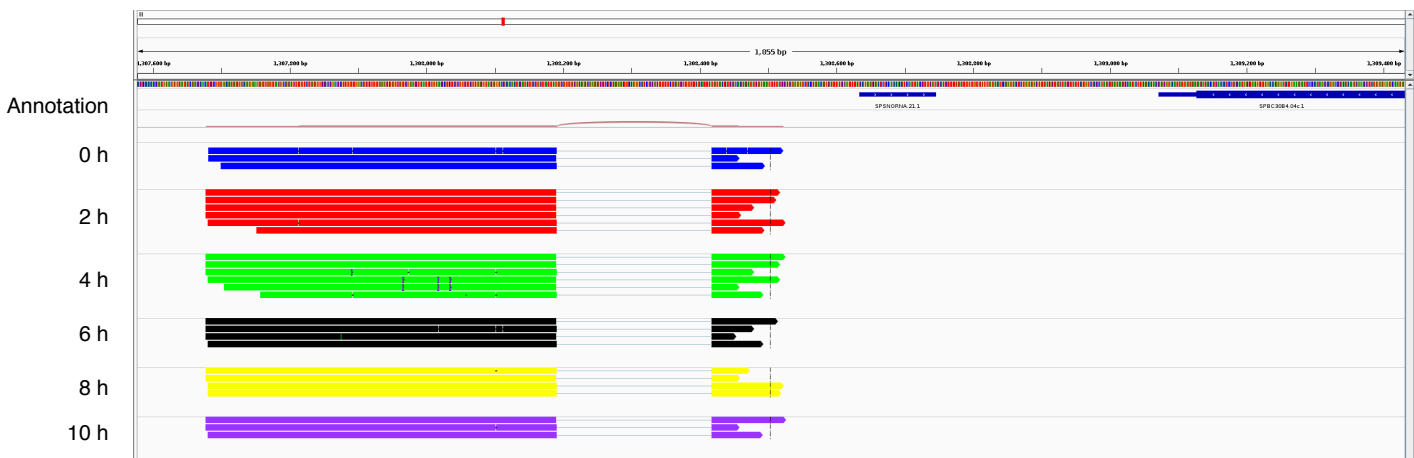

Supplemental Figure S8. Visualization of certificates in IGV. (A) Isoform Iso\_743 has been defined and tracked by SpliceHunter based on reads shown for different time points. Iso\_743 has been assigned to gene SPAC1296.03c(sxa2) (negative strand) based on overlap. SpliceHunter reports a novel acceptor (Definition 6) and a novel exon (Definition 8) for this isoform. (B) SpliceHunter clustered reads shown for different time points by the common intron to define novel TU NG\_I\_35 which does not overlap any annotated gene.
