# Supplementary material for: The dynamic landscape of fission yeast meiosis alternative-splice isoforms
Source: HighWire-hosted journal article supplement (doi:10.1101/gr.208041.116), 2016-11-17
Supplement: Supplemental_Materials.docx [file Supplemental_Materials.docx]

**Table legends**

Supplemental Table S1. Summary of isoforms. The 8th column is the number of CCS FL reads by each replicate at each time point. The 9th column summarizes the type of each AS event along a given isoform as well as their impact on the protein sequence level. From an alignment of altered and annotated protein sequences, the number of inserted or deleted amino acids and the resulting shift in reading frame is depicted. The format representing the alignment is described in detail in Methods. The 10th column gives the multiplicity of each AS type.

Supplemental Table S2. Summary of numbers of reads.

Supplemental Table S3. Numbers of AS events for different cutoffs of supporting CCS FL reads.

Supplemental Table S4. Number of isoforms per gene for different cutoffs of supporting CCS FL reads.

Supplemental Table S5. Number of CCS FL reads supporting annotated, novel and antisense isoforms.

Supplemental Table S6. Antisense isoforms.

Supplemental Table S7. Summary of annotated introns, novel introns with canonical splice sites, novel introns with noncanonical splice sites and retained introns.

Supplemental Table S8. Summary of read-through transcripts.

Supplemental Table S9. Number of CCS FL reads supporting annotated, novel and antisense isoforms at each time points.

Supplemental Table S10. FASTA file of predicted protein sequences.

Supplemental Table S11. Translational status. “Both” means this gene may generate both annotated and novel proteins. “WT” means this gene only generates annotated proteins. “Novel” means this gene may only generate novel proteins.

Supplemental Table S12. Summary of BLAST results for novel TUs and novel AS isoforms.

**Supplemental Methods**

**General methods**

Briefly, SP2910 (*mat1-PΔ17/mat1-M-smt-o his2/+ leu1-32/+ ura4/+ ade6-M210/ade6-M216*) was grown in 1ml YES medium overnight and diluted in EMM culture at an OD of 0.1. Cells were harvested and washed when they entered into the log phase (~OD 0.6) and resuspended in EMM without NH4Cl (EMM-N). 10 OD of cells were collected from 0 to 10 hours after resuspending in EMM-N medium every 2 hours. Total RNA was extracted using the RNeasy Mini kit (Qiagen, 74106) and poly(A)+ selection was performed using the Poly(A)Purist MAG kit (Invitrogen AM1922). cDNA libraries were synthesized using the SMARTer PCR cDNA synthesis kit (Clontech, 634926). SMRT libraries were generated in the Johns Hopkins Deep Sequencing and Microarray core facility using the Pacific Biosciences’s template prep kit. 5 SMRT cells were used for each time point.

**Iso-Seq analysis and read alignment**

Reads from different replicates and time points were processed independently. Standard parameters were used to cluster and polish reads. We used the CCS, full length CCS and Iso-Seq reads for downstream analysis. The number of reads and and their length were directly obtained from read sequence files in fasta format. Iso-Seq reads were aligned to the v2.29 *S. pombe* genome (Wood et al. 2012) using GMAP (Wu and Watanabe 2005). The alignments were provided to the SpliceHunter pipeline which initially filters for high-confidence reads that map to a unique location in the reference and that satisfy the quality criteria proposed in (Tilgner et al. 2013): At least two thirds of the nucleotides must align to the reference, and at least three quarters of these aligned nucleotides must be identical (no mismatches). Furthermore, SpliceHunter discards reads which align with a mismatch or indel near (default 10bp) at least one of its implied novel splice sites, unless it can shift the originally novel splice site to a near (default 10bp) annotated splice site. SpliceHunter then clusters Iso-Seq reads into isoforms. For each isoform, the coordinates and composition of exons are compared to annotated exon-intron structures (v2.29 from PomBase) to infer the types of AS events. For time-course analysis, FL CCS reads were counted at each time point and read counts were normalized by the total numbers of reads per time point.

**Comparison of AS events**

Alternative exon/intron positions from the ribosomal profiling study were manually compared to our results since only 13 genes were reported to have alternative coordinates of exon-intron junctions. AS events from the lariat sequencing results were compared by firstly generating the pairs of 5’ and 3’ splicing sites from both studies. Combinations of coordinates were compared between the two studies to infer the overlap. Besides exact matches, we also relaxed the exon/intron boundaries by +/- 1, 2, 3 bp and searched for overlapping pairs. We did not observe large differences by relaxing the boundaries. Results based on perfect matches were displayed in Venn diagrams.

**Association analysis of intron pairs**

Analogously to (Tilgner H et al. 2015), we call an intron alternatively retained if it is retained at least 5% and at most 95% in reads spanning it. For each gene with at least two annotated introns, we count for each pair of alternatively retained introns FL CCS reads in four categories: (i) reads retaining both alternative introns, (ii) reads retaining only the first, (iii) reads retaining only the second, (iv) reads retaining none. A 2x2 table was generated based on these 4 numbers and a two-sided Fisher’s exact test was performed to calculate p-values, which were then adjusted by false discovery rate. Novel introns in exons and mixed pairs of events were tested analogously.

**Conservation analysis**

We performed a BLAST search of novel protein sequences (blastp) against taxa databases of fission yeast (txid 4894), fungi (txid 4751) and eukaryotes (txid 2759). Alignments with alignment length >= 30 aa and E value <= 0.05 for fission yeast and fungi or E value <= 0.001 for eukaryotes were considered as hits. In this analysis, we only considered amino acid sequences from AS isoforms that had >2 supporting FL CCS reads and where the suffix sequence starting at the first AS event was >=19 amino acids long. For novel TUs, we extended our search for homologs by running blastx, tblastn and tblastx (Altschul et al. 1997), while changing the minimum alignment length to 50 bp. Secondary structure was predicted using the RaptorX web portal.

**Alternative Splicing Event Definition**

We consider the following types of AS events (Figure 1B). An *exon skipping* is implied by a novel intron that contains at least one complete exon of the reference transcript. An exon in a novel isoform represents an *exon inclusion* event if it is skipped in the reference transcript. An *intron retention* is defined as an exon in the novel isoform that strictly contains at least one intron in the reference transcript. Conversely, we denote an intron of the novel isoform as *intron in exon* if it is retained as part of an exon of the reference transcript. *Alternative acceptors* and *donors* are the 3’ and 5’ ends of an intron that do not appear in the reference transcript. Finally, *novel exons* are not included (see above) and do not overlap any exon in the reference transcript. Formal definitions of all AS types can be found in Methods.

We introduce a rigorous classification scheme and nomenclature of alternative splicing events that enables an unambiguous discussion of observed splicing patterns. We represent a transcript by its sequence of splice sites , ordered from 5’ to 3’. Sites and represent transcription start and end site, respectively, and the introns, for ⎡⎤. The implied exons are , for . We assign alternative splicing events of a transcript with respect to a reference transcript to one of the following categories (see Figure 1B).

**Definition 1** (Exon skipping) A novel intron in implies an *exon skipping* event if the interval strictly contains at least one exon of and if both and are present in the primary RNA sequence of .

**Definition 2** (Exon inclusion)

An exon in implies an *exon inclusion* event if it is skipped (according to Definition 1) in with respect to .

**Definition 3** (Intron retention)

An exon in that strictly contains at least one intron in is denoted as *intron retention*. Note that by definition the splice sites of the retained intron are present in the primary RNA sequence of .

**Definition 4** (Intron in exon)

We denote an intron as *intron in exon* if it is retained (according to Definition 3) in an exon of .

**Definition 5** (Alternative donor)

Splice site of an intron in is an *alternative donor*, if it does not match any splice site in and if it is present in the primary RNA sequence of .

**Definition 6** (Alternative acceptor)

Splice site of an intron in is an *alternative acceptor*, if it does not match any splice site in and if it is present in the primary RNA sequence of .

**Definition 7** (Alternative donor/acceptor)

Splice sites and of an intron in form an *alternative donor/acceptor* pair, if is an alternative donor (Definition 5) and is an alternative acceptor (Defintion 6).

**Definition 8** (Novel exon)

We define an exon in that does not overlap any exon in and that is not an exon inclusion (Definition 2) as *novel exon*.

**Supplemental note**

**Read-through transcripts**

Read-through transcripts for *SPBC887.05c(cwf29)-SPBC887.06c(snx3), SPAPB1A10.03(nxt1)-SPAPB1A10.16* and *SPAC19D5.05c(imp3)-SPAC19D5.11c(ctf8)* covered every exon of individual genes but *SPAC16E8.02-SPAC16E8.03(gna1)* lacked the last, noncoding exon of *SPAC16E8.02*, which theoretically leads to an in-frame fusion of the two ORFs (Supplemental Figure S4D). *SPAC16E8.02* encodes a DUF962 family protein and *SPAC16E8.03* (*gna1*) encodes a glucosamine-phosphate N-acetyltransferase. Interestingly, both genes are essential for spore germination (Hayles et al. 2013). The read-through transcript was highly induced at the late stage of meiosis but individual transcripts were low and static, suggesting that the read-through transcript encodes a fused protein essential for spore germination. Another interesting example is *SPAC19D5.05c(imp3)-SPAC19D5.11c(ctf8)*, which exhibited the opposite temporal pattern compared to *SPAC19D5.05c*(*imp3*). Imp3 is a predicted U3 snoRNP-associated protein and it is required for both vegetative growth and spore germination (Hayles et al. 2013; Kim et al. 2010). Interestingly, the transcript of *imp3* decreased from mitosis to meiosis while the read-through isoform increased in the middle of meiosis (Supplemental Figure S4C), implying a possible switch of the transcriptional program for *imp3* between mitosis and meiosis. The two reading frames are not disrupted in this read-through isoform.

**Reference**

Altschul SF, Madden TL, Schaffer AA, Zhang J, Zhang Z, Miller W, Lipman DJ. 1997. Gapped BLAST and PSI-BLAST: a new generation of protein database search programs*. Nucleic Acids Res* **25**: 3389-3402.

Duncan CD, Mata J. 2014. The translational landscape of fission-yeast meiosis and sporulation*. Nature structural & molecular biology* **21**: 641-647.

Hayles J, Wood V, Jeffery L, Hoe KL, Kim DU, Park HO, Salas-Pino S, Heichinger C, Nurse P. 2013. A genome-wide resource of cell cycle and cell shape genes of fission yeast*. Open Biol* **3**: 130053.

Kim D, Hayles J, Kim D, Wood V, Park H, Won M, Yoo H, Duhig T, Nam M, Palmer G. 2010. Analysis of a genome-wide set of gene deletions in the fission yeast Schizosaccharomyces pombe*. Nat Biotechnol* **28**: 617-623.

Tilgner H, Raha D, Habegger L, Mohiuddin M, Gerstein M, Snyder M. 2013. Accurate identification and analysis of human mRNA isoforms using deep long read sequencing. *G3 (Bethesda)* **3**: 387-397.

Tilgner H, Jahanbani F, Blauwkamp T, Moshrefi A, Jaeger E, Chen F, Harel I, Bustamante CD, Rasmussen M, Snyder MP. Comprehensive transcriptome analysis using synthetic long-read sequencing reveals molecular co-association of distant splicing events. *Nat Biotechnol* **33**: 736-742.

Wood V, Harris MA, McDowall MD, Rutherford K, Vaughan BW, Staines DM, Aslett M, Lock A, Bahler J, Kersey PJ, et al. 2012. PomBase: a comprehensive online resource for fission yeast*. Nucleic Acids Res* **40**: D695-9.

Wu TD, Watanabe CK. 2005. GMAP: a genomic mapping and alignment program for mRNA and EST sequences*. Bioinformatics* **21**: 1859-1875.
