# Supplementary material for: The dynamic landscape of fission yeast meiosis alternative-splice isoforms
Source: HighWire-hosted journal article supplement (doi:10.1101/gr.208041.116), 2016-11-17
Supplement: Supplemental_Table_S7.xlsx [file Supplemental_Table_S7.xlsx]

## Sheet: Annotated
Read count	Type	Chromosome	Coordinate_L	Coordinate_R	length (bp)
75	AI	I	1009023	1009068	45
85	AI	I	1016669	1016729	60
49	AI	I	1018827	1018868	41
15	AI	I	1022807	1022846	39
17	AI	I	1023794	1023835	41
26	AI	I	1030287	1030337	50
41	AI	I	1030441	1030502	61
48	AI	I	1030721	1030810	89
55	AI	I	1030926	1030997	71
55	AI	I	1031361	1031417	56
61	AI	I	1032215	1032257	42
9	AI	I	1032310	1032358	48
7	AI	I	1032586	1032627	41
10	AI	I	1032716	1032765	49
8	AI	I	1036343	1036396	53
18	AI	I	1038061	1038115	54
400	AI	I	1041598	1041672	74
350	AI	I	1041745	1042069	324
353	AI	I	1043264	1043381	117
131	AI	I	1043512	1043595	83
125	AI	I	1043671	1043719	48
115	AI	I	1043789	1044000	211
106	AI	I	1047385	1047434	49
211	AI	I	1047485	1047529	44
203	AI	I	1049198	1049364	166
255	AI	I	1050088	1050174	86
282	AI	I	1051739	1051782	43
644	AI	I	1051921	1051970	49
652	AI	I	1053167	1053243	76
97	AI	I	1053676	1053719	43
108	AI	I	1054254	1054345	91
120	AI	I	1054809	1054873	64
69	AI	I	1054956	1055167	211
72	AI	I	1058415	1058464	49
24	AI	I	1058514	1058622	108
26	AI	I	1059777	1059837	60
17	AI	I	1060104	1060142	38
20	AI	I	1060670	1060708	38
27	AI	I	1062564	1062630	66
10	AI	I	1062738	1062795	57
8	AI	I	1067718	1067772	54
41	AI	I	1080606	1080658	52
36	AI	I	1081433	1081470	37
22	AI	I	1083142	1083193	51
6437	AI	I	1089044	1089306	262
79	AI	I	1094560	1094615	55
108	AI	I	1094695	1094744	49
117	AI	I	1094854	1094896	42
100	AI	I	1094920	1095141	221
118	AI	I	1095274	1095327	53
111	AI	I	1096924	1097011	87
28	AI	I	1097198	1097247	49
29	AI	I	1101979	1102022	43
33	AI	I	1102290	1102334	44
34	AI	I	1106203	1106252	49
87	AI	I	1108703	1108758	55
37	AI	I	1108846	1109054	208
30	AI	I	1110293	1110755	462
45	AI	I	1110809	1110851	42
46	AI	I	1112464	1112507	43
2	AI	I	1116202	1116246	44
32	AI	I	1116367	1116414	47
31	AI	I	112046	112097	51
6	AI	I	112333	112377	44
1	AI	I	113367	113434	67
28	AI	I	1135061	1135194	133
648	AI	I	1135402	1135516	114
638	AI	I	1135684	1135728	44
604	AI	I	1135776	1135931	155
561	AI	I	1136754	1136796	42
43	AI	I	1139333	1139447	114
214	AI	I	1145696	1145887	191
245	AI	I	1146041	1146109	68
285	AI	I	1170461	1170503	42
95	AI	I	1171270	1171361	91
85	AI	I	1171856	1171899	43
69	AI	I	1171956	1171998	42
2	AI	I	1172789	1172832	43
42	AI	I	1173207	1173292	85
36	AI	I	1173609	1173672	63
34	AI	I	1173979	1174028	49
28	AI	I	1174707	1174757	50
237	AI	I	1182122	1182166	44
291	AI	I	1182217	1182272	55
282	AI	I	1186337	1186396	59
306	AI	I	1192592	1192661	69
31	AI	I	1192704	1192778	74
42	AI	I	1192841	1192915	74
36	AI	I	1193010	1193061	51
49	AI	I	1193145	1193196	51
45	AI	I	1194407	1194519	112
258	AI	I	1194631	1194710	79
238	AI	I	1194870	1194913	43
235	AI	I	1198541	1198591	50
48	AI	I	1199020	1199073	53
53	AI	I	1199219	1199297	78
52	AI	I	1199397	1199453	56
51	AI	I	1210358	1210411	53
3	AI	I	1211984	1212204	220
130	AI	I	1213504	1213548	44
2	AI	I	1215638	1215722	84
111	AI	I	1215861	1215901	40
112	AI	I	1220440	1220494	54
66	AI	I	1220703	1220754	51
53	AI	I	1224778	1224821	43
6	AI	I	1225725	1225810	85
29	AI	I	1225936	1226038	102
25	AI	I	1238979	1239024	45
117	AI	I	1239108	1239172	64
111	AI	I	1252807	1253429	622
3	AI	I	1255953	1256011	58
1383	AI	I	1262609	1262654	45
19	AI	I	1271801	1271838	37
1	AI	I	1271972	1272014	42
22	AI	I	1274077	1274130	53
27	AI	I	1274191	1274230	39
22	AI	I	1274312	1274352	40
25	AI	I	1274447	1274489	42
25	AI	I	1275769	1275836	67
81	AI	I	1276846	1276936	90
32	AI	I	1276986	1277040	54
43	AI	I	1277108	1277168	60
40	AI	I	1277270	1277312	42
40	AI	I	1277419	1277457	38
44	AI	I	1278092	1278139	47
41	AI	I	1279779	1279819	40
109	AI	I	1279869	1279952	83
128	AI	I	1281060	1281106	46
228	AI	I	1282073	1282116	43
19	AI	I	1282167	1282340	173
18	AI	I	1283335	1283386	51
1027	AI	I	1283504	1283562	58
1032	AI	I	1283642	1283758	116
1024	AI	I	1284105	1284151	46
1060	AI	I	1285629	1285700	71
614	AI	I	129059	129102	43
8	AI	I	129127	129171	44
13	AI	I	1293689	1293751	62
116	AI	I	1296255	1296413	158
147	AI	I	1300242	1300281	39
209	AI	I	1300356	1300396	40
208	AI	I	1300480	1300633	153
220	AI	I	1300842	1300888	46
199	AI	I	1305542	1305580	38
6	AI	I	1306512	1306568	56
172	AI	I	1321483	1321781	298
309	AI	I	1321841	1321902	61
359	AI	I	1322088	1322137	49
384	AI	I	1323955	1323998	43
31	AI	I	1324140	1324194	54
27	AI	I	1324252	1324298	46
34	AI	I	1324377	1324430	53
34	AI	I	1325005	1325085	80
13	AI	I	1334921	1335029	108
46	AI	I	1336320	1336388	68
27	AI	I	1336632	1336704	72
26	AI	I	1336901	1336951	50
21	AI	I	1337346	1337401	55
26	AI	I	1339375	1339580	205
372	AI	I	1339700	1339868	168
372	AI	I	1340533	1340825	292
99	AI	I	1341544	1341582	38
130	AI	I	1342922	1342978	56
114	AI	I	1343114	1343167	53
107	AI	I	1350871	1350914	43
49	AI	I	1353236	1353423	187
52	AI	I	1354419	1354687	268
58	AI	I	1354711	1354757	46
57	AI	I	1368240	1368280	40
156	AI	I	1368322	1368387	65
135	AI	I	1368441	1368645	204
154	AI	I	1368725	1368807	82
129	AI	I	1368904	1368944	40
150	AI	I	1370394	1370457	63
51	AI	I	1371620	1371673	53
70	AI	I	1372044	1372280	236
118	AI	I	1376947	1377031	84
96	AI	I	1378620	1378662	42
139	AI	I	1378773	1378822	49
122	AI	I	1380975	1381267	292
441	AI	I	1381326	1381406	80
444	AI	I	1383224	1383299	75
326	AI	I	1384723	1384791	68
148	AI	I	1388026	1388066	40
20	AI	I	1388574	1388636	62
21	AI	I	1399970	1400026	56
13	AI	I	1402464	1402655	191
3	AI	I	1402747	1402805	58
4	AI	I	1412214	1412261	47
28	AI	I	1412792	1412835	43
16	AI	I	1413237	1413275	38
13	AI	I	1413410	1413448	38
13	AI	I	141510	141558	48
10	AI	I	1418440	1418508	68
4	AI	I	1418654	1418693	39
2	AI	I	1422071	1422179	108
32	AI	I	1422552	1422610	58
65	AI	I	1425161	1425230	69
19	AI	I	1425329	1425371	42
10	AI	I	1425430	1425477	47
18	AI	I	1427148	1427188	40
12	AI	I	1429617	1429708	91
1	AI	I	1433153	1433198	45
9	AI	I	1434002	1434047	45
42	AI	I	1434137	1434183	46
48	AI	I	1440057	1440111	54
100	AI	I	1440276	1440325	49
96	AI	I	1443072	1443115	43
326	AI	I	1444932	1445058	126
939	AI	I	1451004	1451078	74
132	AI	I	1454927	1455043	116
330	AI	I	1457541	1457638	97
103	AI	I	1472508	1472553	45
33	AI	I	1473383	1473439	56
43	AI	I	1473885	1473938	53
120	AI	I	1474105	1474152	47
117	AI	I	1474212	1474263	51
117	AI	I	1474341	1474380	39
99	AI	I	1474404	1474459	55
107	AI	I	1475049	1475099	50
129	AI	I	1475899	1475947	48
101	AI	I	1485887	1485945	58
19	AI	I	1487237	1487286	49
38	AI	I	1499358	1499433	75
327	AI	I	1503373	1503419	46
172	AI	I	1504174	1504227	53
155	AI	I	1504350	1504403	53
127	AI	I	1504509	1504611	102
149	AI	I	1506583	1506640	57
78	AI	I	1506731	1506767	36
71	AI	I	1506898	1507027	129
70	AI	I	1512198	1512345	147
57	AI	I	1513366	1513408	42
44	AI	I	1514014	1514085	71
50	AI	I	1514316	1514370	54
6	AI	I	1516663	1516788	125
88	AI	I	1521742	1521786	44
26	AI	I	1523837	1523896	59
99	AI	I	1533838	1533884	46
8	AI	I	1545608	1545660	52
83	AI	I	1549487	1549545	58
20	AI	I	1549602	1549646	44
20	AI	I	1554072	1554134	62
139	AI	I	1554166	1554213	47
139	AI	I	1554292	1554380	88
138	AI	I	1557410	1557455	45
109	AI	I	1557589	1557627	38
104	AI	I	1557843	1557897	54
103	AI	I	1558014	1558069	55
104	AI	I	1558220	1558267	47
97	AI	I	1558957	1559006	49
84	AI	I	1559127	1559173	46
90	AI	I	1559639	1559689	50
23	AI	I	1568869	1569063	194
65	AI	I	1569160	1569215	55
86	AI	I	1575484	1575672	188
220	AI	I	1575822	1575885	63
217	AI	I	1575976	1576020	44
234	AI	I	1577836	1577901	65
10	AI	I	1578445	1578491	46
19	AI	I	1578656	1578792	136
51	AI	I	1578984	1579042	58
58	AI	I	1582597	1582656	59
29	AI	I	1585045	1585091	46
14	AI	I	1585196	1585247	51
17	AI	I	1585325	1585370	45
15	AI	I	1586096	1586188	92
105	AI	I	1586863	1586943	80
98	AI	I	1587573	1587622	49
76	AI	I	1589391	1589462	71
60	AI	I	1593780	1593869	89
101	AI	I	1594182	1594271	89
78	AI	I	1594340	1594393	53
86	AI	I	1595362	1595410	48
360	AI	I	1602593	1602680	87
8	AI	I	1602742	1602786	44
25	AI	I	1604396	1604529	133
992	AI	I	1606803	1606974	171
21	AI	I	1613854	1613922	68
172	AI	I	1615336	1615379	43
109	AI	I	1616168	1616213	45
33	AI	I	1618127	1618190	63
10	AI	I	1618349	1618390	41
9	AI	I	1618532	1618582	50
10	AI	I	1619727	1619784	57
349	AI	I	1619915	1619968	53
338	AI	I	1620608	1620656	48
52	AI	I	1622195	1622245	50
84	AI	I	1629753	1629824	71
1	AI	I	1632087	1632166	79
18	AI	I	1632209	1632361	152
20	AI	I	1632394	1632444	50
20	AI	I	1635274	1635326	52
144	AI	I	1638741	1638782	41
17	AI	I	1640811	1640877	66
72	AI	I	1643126	1643169	43
122	AI	I	1643292	1643509	217
101	AI	I	1645231	1645355	124
83	AI	I	1645506	1645560	54
75	AI	I	1647261	1647316	55
42	AI	I	1647416	1647458	42
46	AI	I	1651141	1651184	43
43	AI	I	1651341	1651388	47
48	AI	I	1652076	1652126	50
64	AI	I	1653306	1653355	49
28	AI	I	1653606	1653723	117
27	AI	I	1670510	1670576	66
26	AI	I	1670813	1670883	70
31	AI	I	1672952	1672998	46
57	AI	I	1673389	1673441	52
48	AI	I	1679642	1679698	56
20	AI	I	1680435	1680488	53
48	AI	I	1692037	1692077	40
22	AI	I	1692112	1692160	48
24	AI	I	1692242	1692296	54
24	AI	I	1692406	1692471	65
25	AI	I	1695104	1695151	47
132	AI	I	1695199	1695252	53
93	AI	I	1696689	1696831	142
350	AI	I	1700959	1701097	138
76	AI	I	1701142	1701213	71
75	AI	I	1701292	1701361	69
59	AI	I	1701405	1701449	44
69	AI	I	1706291	1706358	67
15	AI	I	1706568	1706690	122
16	AI	I	1706879	1706927	48
14	AI	I	1707105	1707149	44
14	AI	I	1708824	1708861	37
152	AI	I	1710549	1710692	143
652	AI	I	1712939	1713156	217
155	AI	I	1714317	1714373	56
46	AI	I	1714987	1715044	57
38	AI	I	1715378	1715431	53
25	AI	I	1717413	1717474	61
70	AI	I	1717574	1717620	46
68	AI	I	1717668	1717710	42
68	AI	I	1722024	1722069	45
5	AI	I	1728730	1728816	86
92	AI	I	1738198	1738260	62
97	AI	I	1738591	1738663	72
51	AI	I	1738754	1738821	67
53	AI	I	1738876	1738923	47
51	AI	I	1743124	1743298	174
24	AI	I	1743378	1743420	42
25	AI	I	1744950	1745234	284
257	AI	I	1745519	1745572	53
214	AI	I	1751448	1751502	54
4	AI	I	1754145	1754185	40
64	AI	I	1754310	1754349	39
61	AI	I	1755118	1755163	45
50	AI	I	1755285	1755330	45
46	AI	I	1758185	1758256	71
297	AI	I	1761231	1761275	44
3	AI	I	1764792	1764876	84
81	AI	I	1765113	1765167	54
108	AI	I	1765272	1765341	69
48	AI	I	1766188	1766336	148
38	AI	I	1766530	1766588	58
34	AI	I	1766644	1766690	46
39	AI	I	1767710	1767783	73
706	AI	I	1773205	1773263	58
27	AI	I	1773372	1773422	50
53	AI	I	1773500	1773564	64
51	AI	I	1773693	1773762	69
60	AI	I	1776608	1776661	53
99	AI	I	1776957	1777068	111
105	AI	I	1778563	1778601	38
6	AI	I	1778669	1778719	50
6	AI	I	1786457	1786499	42
13	AI	I	1786542	1786604	62
10	AI	I	1786637	1786705	68
10	AI	I	1787352	1787450	98
17	AI	I	1787658	1787714	56
16	AI	I	1788092	1788191	99
8	AI	I	1788446	1788498	52
9	AI	I	1793951	1794022	71
246	AI	I	1794497	1794588	91
239	AI	I	1794766	1794851	85
233	AI	I	180528	180585	57
118	AI	I	180721	180889	168
125	AI	I	1807402	1807482	80
9	AI	I	1807642	1807717	75
8	AI	I	1808376	1808427	51
270	AI	I	1808538	1808629	91
262	AI	I	1808660	1808706	46
231	AI	I	1808741	1808799	58
252	AI	I	1808918	1809165	247
170	AI	I	181436	181484	48
77	AI	I	181574	181631	57
73	AI	I	181749	182000	251
63	AI	I	1826423	1826464	41
27	AI	I	1826547	1826602	55
20	AI	I	1826809	1826964	155
21	AI	I	1838852	1838969	117
8	AI	I	1863381	1863433	52
7	AI	I	1864360	1864414	54
90	AI	I	1864880	1864931	51
168	AI	I	1871515	1871562	47
14	AI	I	1872472	1872521	49
192	AI	I	1876886	1876958	72
100	AI	I	1878785	1878832	47
13	AI	I	1881325	1881379	54
451	AI	I	1881478	1881829	351
440	AI	I	1885876	1886077	201
62	AI	I	1892640	1892925	285
54	AI	I	1893060	1893115	55
86	AI	I	1900165	1900206	41
12	AI	I	1900289	1900328	39
17	AI	I	1900346	1900385	39
15	AI	I	1900637	1900698	61
103	AI	I	1904455	1904498	43
3	AI	I	190584	190729	145
38	AI	I	1916155	1916318	163
1426	AI	I	1916387	1916817	430
1416	AI	I	1920201	1920606	405
188	AI	I	1923085	1923192	107
23	AI	I	1925125	1925176	51
408	AI	I	1925273	1925345	72
344	AI	I	1931084	1931128	44
27	AI	I	1936234	1936335	101
96	AI	I	1939004	1939074	70
365	AI	I	1945852	1945892	40
111	AI	I	1947011	1947059	48
69	AI	I	1947754	1947794	40
50	AI	I	1947981	1948045	64
44	AI	I	195258	195507	249
70	AI	I	196174	196220	46
28	AI	I	1965294	1965333	39
39	AI	I	1965803	1965844	41
58	AI	I	1966050	1966101	51
66	AI	I	1973756	1973815	59
266	AI	I	1975313	1975378	65
104	AI	I	1976129	1976205	76
126	AI	I	1977006	1977067	61
72	AI	I	1977191	1977261	70
62	AI	I	1977363	1977403	40
66	AI	I	1977449	1977555	106
75	AI	I	1977601	1977650	49
62	AI	I	1978592	1978638	46
110	AI	I	1981957	1982040	83
15	AI	I	1985873	1985929	56
14	AI	I	1987471	1987508	37
35	AI	I	1996148	1996190	42
109	AI	I	1996268	1996324	56
109	AI	I	1996413	1996477	64
89	AI	I	1999198	1999249	51
151	AI	I	2014286	2014326	40
46	AI	I	2014551	2014598	47
45	AI	I	2015095	2015135	40
41	AI	I	2016456	2016508	52
101	AI	I	2016698	2016840	142
117	AI	I	2017259	2017319	60
21	AI	I	2020411	2020482	71
231	AI	I	2028198	2028274	76
64	AI	I	2028573	2028697	124
46	AI	I	2031605	2031666	61
530	AI	I	2032629	2032687	58
47	AI	I	2033082	2033131	49
51	AI	I	2036667	2036712	45
5	AI	I	2036825	2036863	38
5	AI	I	2036959	2037007	48
5	AI	I	2037417	2037467	50
7	AI	I	2039067	2039115	48
17	AI	I	2039885	2039931	46
119	AI	I	2040300	2040348	48
115	AI	I	2041295	2041445	150
348	AI	I	2043954	2044008	54
250	AI	I	2045245	2045283	38
39	AI	I	2047035	2047093	58
7	AI	I	2057624	2057663	39
308	AI	I	2057695	2057727	32
283	AI	I	2057837	2057892	55
357	AI	I	2057928	2057973	45
363	AI	I	2058044	2058336	292
359	AI	I	2067704	2067748	44
12	AI	I	2077384	2077423	39
107	AI	I	2077684	2077725	41
79	AI	I	2077796	2077842	46
81	AI	I	2078366	2078420	54
74	AI	I	2078486	2078527	41
66	AI	I	2078559	2078613	54
66	AI	I	2104600	2104649	49
272	AI	I	2105046	2105243	197
248	AI	I	2107367	2107881	514
12	AI	I	2115200	2115249	49
137	AI	I	2115274	2115337	63
143	AI	I	2116017	2116192	175
80	AI	I	2116255	2116312	57
96	AI	I	2119570	2119613	43
80	AI	I	2119789	2119837	48
76	AI	I	2119915	2119974	59
77	AI	I	2120052	2120095	43
62	AI	I	2120119	2120162	43
59	AI	I	2123356	2123451	95
50	AI	I	2126157	2126200	43
57	AI	I	2126278	2126326	48
64	AI	I	2126391	2126439	48
63	AI	I	2126696	2126732	36
77	AI	I	2127504	2127550	46
97	AI	I	2127652	2127700	48
105	AI	I	2127869	2127911	42
106	AI	I	2128232	2128270	38
102	AI	I	2128480	2128522	42
6	AI	I	2129266	2129312	46
8	AI	I	2131509	2131549	40
62	AI	I	2132426	2132544	118
976	AI	I	2133702	2133781	79
151	AI	I	2134096	2134149	53
149	AI	I	2134335	2134375	40
146	AI	I	2134488	2134573	85
149	AI	I	2138210	2138266	56
18	AI	I	2138409	2138448	39
16	AI	I	2138844	2138897	53
16	AI	I	2145779	2145926	147
211	AI	I	2145987	2146042	55
213	AI	I	2146170	2146325	155
220	AI	I	2150744	2150783	39
42	AI	I	2150882	2150929	47
43	AI	I	2151128	2151179	51
40	AI	I	2151342	2151385	43
55	AI	I	2152199	2152259	60
514	AI	I	2152540	2152698	158
571	AI	I	2153011	2153072	61
640	AI	I	2153374	2153467	93
705	AI	I	2156048	2156322	274
189	AI	I	2160602	2160648	46
7	AI	I	2160829	2160907	78
7	AI	I	2167245	2167301	56
72	AI	I	2169267	2169307	40
12	AI	I	2169392	2169437	45
13	AI	I	2173383	2173424	41
104	AI	I	2181723	2181766	43
33	AI	I	2181868	2181924	56
31	AI	I	2183959	2184188	229
13	AI	I	2184267	2184313	46
15	AI	I	2185282	2185471	189
35	AI	I	2189845	2189906	61
76	AI	I	2190180	2190244	64
69	AI	I	2190509	2190696	187
53	AI	I	2193163	2193288	125
117	AI	I	2199570	2199624	54
114	AI	I	2199761	2199825	64
105	AI	I	22076	22131	55
16	AI	I	2215735	2215791	56
822	AI	I	2216241	2216485	244
889	AI	I	2216566	2216620	54
905	AI	I	2218569	2218715	146
53	AI	I	2227119	2227192	73
1	AI	I	2238904	2239047	143
43	AI	I	2243677	2243737	60
55	AI	I	2250977	2251026	49
19	AI	I	2252770	2252820	50
40	AI	I	2252912	2252980	68
31	AI	I	2258623	2258671	48
18	AI	I	2259572	2259621	49
2	AI	I	2260707	2260778	71
452	AI	I	2261312	2261354	42
618	AI	I	2262129	2262194	65
202	AI	I	2262340	2262386	46
199	AI	I	2276974	2277025	51
598	AI	I	2278994	2279090	96
170	AI	I	2280442	2280491	49
189	AI	I	2280766	2280859	93
191	AI	I	2280882	2280991	109
197	AI	I	2281120	2281167	47
213	AI	I	2281239	2281307	68
221	AI	I	2282242	2282302	60
324	AI	I	228232	228311	79
4	AI	I	2282433	2282482	49
423	AI	I	2284717	2284844	127
63	AI	I	2289546	2289947	401
86	AI	I	2293088	2293136	48
65	AI	I	2293754	2293810	56
51	AI	I	2294893	2294939	46
37	AI	I	2299133	2299192	59
47	AI	I	2299299	2299349	50
51	AI	I	2309212	2309258	46
42	AI	I	2309569	2309609	40
75	AI	I	2309667	2309713	46
79	AI	I	2309946	2309997	51
45	AI	I	2310088	2310129	41
73	AI	I	2310517	2310560	43
48	AI	I	2311571	2311693	122
35	AI	I	2313961	2314048	87
47	AI	I	2314131	2314189	58
46	AI	I	2315349	2315385	36
78	AI	I	2315599	2315700	101
49	AI	I	2327862	2328646	784
381	AI	I	2332256	2332305	49
175	AI	I	2332385	2332436	51
162	AI	I	2332563	2332604	41
169	AI	I	2338279	2338417	138
407	AI	I	2339976	2340020	44
111	AI	I	2340168	2340218	50
121	AI	I	2340275	2340391	116
109	AI	I	2340950	2340990	40
117	AI	I	2348088	2348208	120
106	AI	I	2348322	2348424	102
167	AI	I	2348614	2348704	90
330	AI	I	2348881	2349007	126
308	AI	I	2349080	2349124	44
357	AI	I	2350340	2350382	42
56	AI	I	2350471	2350540	69
85	AI	I	235053	235102	49
33	AI	I	2356154	2356425	271
279	AI	I	2357468	2357575	107
36	AI	I	2357697	2357762	65
40	AI	I	2361931	2361980	49
13	AI	I	2366127	2366174	47
49	AI	I	2366264	2366380	116
57	AI	I	2367496	2367541	45
48	AI	I	2367725	2367766	41
42	AI	I	2367955	2367999	44
45	AI	I	2368201	2368256	55
45	AI	I	2371809	2371876	67
107	AI	I	2371965	2372102	137
70	AI	I	2373263	2373302	39
42	AI	I	2373376	2373412	36
40	AI	I	2373583	2373625	42
35	AI	I	2373744	2373791	47
34	AI	I	2373961	2374001	40
30	AI	I	2376223	2376279	56
13	AI	I	2377515	2377581	66
38	AI	I	2377652	2377764	112
45	AI	I	2380026	2380171	145
98	AI	I	2383180	2383233	53
12	AI	I	2387265	2387321	56
76	AI	I	2390240	2390278	38
31	AI	I	2390547	2390589	42
32	AI	I	2391011	2391054	43
34	AI	I	2396615	2396700	85
352	AI	I	2397823	2397878	55
78	AI	I	2399487	2399528	41
92	AI	I	2400462	2400516	54
113	AI	I	2401067	2401145	78
115	AI	I	2401247	2401299	52
122	AI	I	2401371	2401440	69
101	AI	I	2401523	2401565	42
106	AI	I	2402493	2402543	50
56	AI	I	2403510	2403559	49
22	AI	I	2404250	2404366	116
10	AI	I	2406687	2406745	58
43	AI	I	2406805	2406865	60
45	AI	I	241537	241588	51
87	AI	I	241709	241756	47
81	AI	I	2426279	2426413	134
239	AI	I	242815	242916	101
41	AI	I	2430459	2430543	84
26	AI	I	2431127	2431183	56
34	AI	I	2431816	2431856	40
39	AI	I	2436241	2436466	225
267	AI	I	2439657	2439854	197
1694	AI	I	2440253	2440506	253
1884	AI	I	2443634	2443740	106
377	AI	I	2444921	2445001	80
418	AI	I	2445412	2445472	60
53	AI	I	2445968	2446051	83
59	AI	I	2465405	2465445	40
59	AI	I	2465835	2465877	42
65	AI	I	2466069	2466112	43
74	AI	I	2468000	2468042	42
113	AI	I	2468144	2468194	50
105	AI	I	2468254	2468291	37
117	AI	I	2472749	2472860	111
187	AI	I	247438	247490	52
7	AI	I	2481645	2481977	332
189	AI	I	2484045	2484090	45
20	AI	I	2484666	2484722	56
19	AI	I	2485537	2485635	98
28	AI	I	2494856	2494895	39
273	AI	I	2495142	2495213	71
255	AI	I	2495267	2495308	41
281	AI	I	2496697	2496738	41
62	AI	I	2496875	2496918	43
59	AI	I	2499353	2499442	89
159	AI	I	2499824	2499874	50
154	AI	I	2503957	2504007	50
19	AI	I	2505452	2505493	41
550	AI	I	250549	250606	57
8	AI	I	2505540	2505589	49
544	AI	I	2506939	2506984	45
48	AI	I	2517789	2518194	405
27	AI	I	2521750	2521808	58
33	AI	I	2521917	2522033	116
38	AI	I	252337	252391	54
1499	AI	I	252752	253589	837
1378	AI	I	2528101	2528153	52
164	AI	I	2532928	2532990	62
113	AI	I	2533127	2533169	42
106	AI	I	2540642	2540692	50
64	AI	I	2557848	2557937	89
79	AI	I	2558123	2558182	59
75	AI	I	2558893	2558941	48
33	AI	I	2559214	2559253	39
28	AI	I	2561080	2561120	40
6	AI	I	2561210	2561254	44
7	AI	I	256134	256344	210
29	AI	I	2561371	2561409	38
7	AI	I	2561562	2561615	53
5	AI	I	256370	256426	56
28	AI	I	2563889	2563960	71
49	AI	I	2564086	2564156	70
13	AI	I	2564306	2564470	164
14	AI	I	256445	256541	96
32	AI	I	256612	256683	71
29	AI	I	256750	256796	46
23	AI	I	257009	257054	45
20	AI	I	257070	257115	45
22	AI	I	257135	257178	43
12	AI	I	257181	257228	47
21	AI	I	2574295	2574350	55
149	AI	I	2577577	2577619	42
85	AI	I	2579027	2579083	56
261	AI	I	2579416	2579465	49
251	AI	I	258184	258219	35
6	AI	I	2583902	2583940	38
87	AI	I	2585943	2585990	47
38	AI	I	2587897	2587951	54
66	AI	I	2589275	2589327	52
146	AI	I	259120	259160	40
4	AI	I	259315	259355	40
4	AI	I	2594734	2594791	57
57	AI	I	2594913	2594965	52
56	AI	I	2595693	2595733	40
112	AI	I	2596736	2596804	68
63	AI	I	2598495	2598551	56
127	AI	I	2599299	2599351	52
136	AI	I	2606227	2606278	51
473	AI	I	2606317	2606540	223
436	AI	I	2606613	2606654	41
482	AI	I	2607958	2608088	130
53	AI	I	2609481	2609521	40
174	AI	I	2610291	2610347	56
151	AI	I	2610454	2610528	74
140	AI	I	2610602	2610660	58
144	AI	I	2613310	2613382	72
117	AI	I	2621519	2621661	142
74	AI	I	2621725	2621775	50
72	AI	I	2621878	2621931	53
71	AI	I	2622120	2622168	48
66	AI	I	2622420	2622471	51
7	AI	I	2629819	2629908	89
83	AI	I	2629985	2630020	35
65	AI	I	2637808	2637978	170
74	AI	I	2638210	2638303	93
89	AI	I	2639057	2639120	63
102	AI	I	2643572	2643611	39
140	AI	I	2643683	2643859	176
158	AI	I	2672783	2672977	194
139	AI	I	2675398	2675555	157
965	AI	I	2675606	2675688	82
993	AI	I	2677373	2677427	54
99	AI	I	2688263	2688316	53
121	AI	I	2689771	2690152	381
104	AI	I	2690272	2690407	135
254	AI	I	2690743	2690803	60
262	AI	I	2692174	2692233	59
33	AI	I	2693106	2693185	79
22	AI	I	2693352	2693435	83
13	AI	I	2695101	2695170	69
4	AI	I	2695619	2695683	64
14	AI	I	2700521	2700657	136
197	AI	I	2701653	2701693	40
215	AI	I	2705024	2705075	51
374	AI	I	2705361	2705408	47
343	AI	I	2705503	2705552	49
366	AI	I	2706552	2706603	51
114	AI	I	2706671	2706727	56
112	AI	I	2706918	2706982	64
113	AI	I	2708446	2708778	332
187	AI	I	2721100	2721201	101
77	AI	I	272116	272169	53
136	AI	I	2721355	2721404	49
82	AI	I	2721499	2721551	52
83	AI	I	2721643	2721747	104
84	AI	I	272190	272256	66
123	AI	I	2722008	2722059	51
95	AI	I	2722291	2722374	83
98	AI	I	2723210	2723272	62
140	AI	I	2723300	2723348	48
156	AI	I	2723559	2723607	48
156	AI	I	2734927	2735331	404
71	AI	I	2740840	2740893	53
1007	AI	I	2746128	2746192	64
1365	AI	I	2746239	2746302	63
873	AI	I	2746335	2746438	103
1383	AI	I	2746931	2747118	187
2	AI	I	2747266	2747340	74
5	AI	I	2747431	2747508	77
5	AI	I	2749100	2749163	63
161	AI	I	2750869	2750909	40
121	AI	I	2752152	2752211	59
87	AI	I	2752329	2752386	57
71	AI	I	2752575	2752622	47
89	AI	I	2752731	2752773	42
65	AI	I	2754899	2754967	68
452	AI	I	2755103	2755191	88
472	AI	I	2759292	2759478	186
120	AI	I	2762096	2762184	88
23	AI	I	2762382	2762453	71
578	AI	I	2762493	2762561	68
598	AI	I	2762585	2762661	76
566	AI	I	2762722	2762786	64
612	AI	I	2762833	2762874	41
615	AI	I	2762921	2763000	79
628	AI	I	2763126	2763180	54
624	AI	I	2764572	2764610	38
47	AI	I	2764752	2764790	38
35	AI	I	2764825	2764871	46
40	AI	I	2765122	2765165	43
42	AI	I	2765263	2765319	56
32	AI	I	2765706	2765803	97
35	AI	I	2770895	2770935	40
39	AI	I	2773012	2773107	95
16	AI	I	2773156	2773203	47
17	AI	I	2774745	2774817	72
294	AI	I	2776083	2776134	51
10	AI	I	2776171	2776250	79
9	AI	I	2777554	2777618	64
1	AI	I	2781550	2781616	66
72	AI	I	2781686	2781746	60
67	AI	I	2781895	2781968	73
77	AI	I	2785684	2786012	328
32	AI	I	2788078	2788127	49
139	AI	I	2788238	2788298	60
145	AI	I	2793252	2793352	100
3849	AI	I	2795045	2795289	244
834	AI	I	2798122	2798163	41
51	AI	I	2799766	2799861	95
35	AI	I	2799995	2800052	57
38	AI	I	2804121	2804387	266
8	AI	I	2812368	2812411	43
459	AI	I	2814516	2814927	411
192	AI	I	2817623	2817664	41
12	AI	I	2818037	2818077	40
17	AI	I	2828349	2828628	279
29	AI	I	2830599	2830798	199
752	AI	I	2830806	2830991	185
650	AI	I	2833036	2833098	62
140	AI	I	2833169	2833425	256
131	AI	I	2833529	2833595	66
142	AI	I	2836067	2836117	50
5	AI	I	2851557	2851666	109
33	AI	I	2852038	2852174	136
128	AI	I	2853796	2853848	52
1	AI	I	2855090	2855168	78
24	AI	I	2855456	2855515	59
107	AI	I	2855577	2855619	42
104	AI	I	2857427	2857462	35
4	AI	I	2859491	2859618	127
72	AI	I	2860878	2860919	41
2	AI	I	2861354	2861417	63
193	AI	I	2864266	2864307	41
25	AI	I	2864442	2864487	45
18	AI	I	2865151	2865209	58
13	AI	I	2865409	2865473	64
12	AI	I	2865501	2865555	54
11	AI	I	2865640	2865695	55
10	AI	I	2866235	2866288	53
342	AI	I	2867391	2867762	371
277	AI	I	2869171	2869264	93
29	AI	I	2871492	2871574	82
301	AI	I	2881943	2881992	49
80	AI	I	2883489	2883541	52
33	AI	I	2884783	2884839	56
17	AI	I	2884932	2884986	54
18	AI	I	2885526	2885591	65
25	AI	I	2885632	2885723	91
24	AI	I	2890184	2890239	55
34	AI	I	2891258	2891309	51
991	AI	I	2892175	2892431	256
772	AI	I	289985	290186	201
95	AI	I	2902761	2902828	67
217	AI	I	2913020	2913062	42
571	AI	I	2980532	2980629	97
30	AI	I	2989507	2989564	57
49	AI	I	2991107	2991156	49
139	AI	I	2991271	2991497	226
141	AI	I	2995688	2995733	45
206	AI	I	2996403	2996453	50
1	AI	I	3008795	3009159	364
121	AI	I	3009258	3009311	53
137	AI	I	301263	301435	172
15	AI	I	3014555	3014594	39
7	AI	I	3014663	3014719	56
8	AI	I	3014947	3015006	59
9	AI	I	301520	301587	67
13	AI	I	3015472	3015514	42
8	AI	I	3016560	3016600	40
13	AI	I	3016775	3016825	50
17	AI	I	3016967	3017010	43
21	AI	I	3018073	3018198	125
325	AI	I	3020010	3020229	219
1032	AI	I	3023169	3023231	62
1	AI	I	3028520	3028569	49
175	AI	I	3029905	3029971	66
117	AI	I	3030188	3030271	83
111	AI	I	303231	303333	102
30	AI	I	303640	303715	75
115	AI	I	3037877	3037919	42
23	AI	I	303793	303851	58
83	AI	I	3039995	3040087	92
94	AI	I	3042817	3042871	54
2	AI	I	3042909	3043095	186
1	AI	I	3043157	3043224	67
3	AI	I	304535	304673	138
19	AI	I	304731	304770	39
17	AI	I	304860	304918	58
20	AI	I	304955	304999	44
21	AI	I	3050745	3051374	629
116	AI	I	305764	305811	47
521	AI	I	305876	306089	213
524	AI	I	3061315	3061374	59
163	AI	I	306210	306315	105
532	AI	I	306419	306467	48
500	AI	I	3066657	3066706	49
1	AI	I	3068370	3068413	43
14	AI	I	3068734	3068781	47
26	AI	I	3071750	3071803	53
80	AI	I	3074719	3074771	52
556	AI	I	3075353	3075428	75
445	AI	I	3081104	3081154	50
73	AI	I	3083850	3083901	51
10	AI	I	3084081	3084124	43
8	AI	I	3084190	3084229	39
9	AI	I	3087071	3087126	55
171	AI	I	3087168	3087229	61
184	AI	I	3087276	3087383	107
190	AI	I	3087587	3087703	116
194	AI	I	3087838	3087894	56
205	AI	I	3090047	3090162	115
115	AI	I	3090285	3090532	247
65	AI	I	3094173	3094228	55
392	AI	I	309719	309750	31
3	AI	I	309839	309888	49
104	AI	I	3099419	3099482	63
62	AI	I	3100667	3100746	79
264	AI	I	3102149	3102282	133
34	AI	I	3102431	3102477	46
36	AI	I	3103565	3103707	142
1010	AI	I	3104364	3104432	68
97	AI	I	3105153	3105218	65
86	AI	I	3105378	3105440	62
88	AI	I	3105547	3105612	65
85	AI	I	310790	310836	46
376	AI	I	3109312	3109605	293
45	AI	I	3110323	3110507	184
82	AI	I	311180	311298	118
351	AI	I	311331	311370	39
327	AI	I	3113999	3114128	129
74	AI	I	3114276	3114362	86
70	AI	I	3114973	3115102	129
196	AI	I	3118862	3118946	84
22	AI	I	312212	312273	61
26	AI	I	3126310	3126355	45
14	AI	I	3127813	3127861	48
35	AI	I	3141603	3141651	48
21	AI	I	3142329	3142395	66
40	AI	I	3142667	3142718	51
47	AI	I	3144046	3144124	78
214	AI	I	3145250	3145297	47
61	AI	I	3151625	3151788	163
51	AI	I	3151869	3151951	82
38	AI	I	3152079	3152133	54
37	AI	I	3152255	3152327	72
37	AI	I	3162443	3162522	79
39	AI	I	3162611	3162669	58
80	AI	I	3163223	3163271	48
87	AI	I	3163311	3163422	111
76	AI	I	3166525	3166587	62
338	AI	I	3166758	3166864	106
347	AI	I	3172699	3172767	68
225	AI	I	3172857	3173051	194
213	AI	I	317469	317513	44
84	AI	I	3175729	3175777	48
12	AI	I	3175906	3175992	86
11	AI	I	3176998	3177047	49
79	AI	I	3179709	3179820	111
354	AI	I	318172	318220	48
73	AI	I	3185577	3185700	123
715	AI	I	3187722	3187810	88
68	AI	I	3187941	3188048	107
64	AI	I	3202833	3202876	43
45	AI	I	3203923	3204067	144
46	AI	I	3207750	3207869	119
62	AI	I	3210102	3210317	215
74	AI	I	3221620	3221794	174
1239	AI	I	3221898	3221948	50
1197	AI	I	3222079	3222122	43
1198	AI	I	3222782	3222847	65
27	AI	I	3226036	3226077	41
2	AI	I	3226980	3227041	61
27	AI	I	3227383	3227455	72
28	AI	I	3228783	3228832	49
22	AI	I	3233907	3233957	50
143	AI	I	3241570	3241654	84
68	AI	I	3241753	3242151	398
59	AI	I	324407	324461	54
324	AI	I	3246912	3246956	44
77	AI	I	3247580	3247625	45
62	AI	I	325166	325224	58
287	AI	I	3253391	3253439	48
79	AI	I	3258748	3258929	181
235	AI	I	3259053	3259183	130
243	AI	I	3259386	3259441	55
237	AI	I	3268512	3268576	64
1598	AI	I	326856	326941	85
144	AI	I	3272265	3272416	151
59	AI	I	327391	327497	106
221	AI	I	3275874	3275924	50
129	AI	I	3279367	3279419	52
181	AI	I	3279539	3279682	143
173	AI	I	3279819	3279864	45
157	AI	I	3281514	3281583	69
52	AI	I	3285298	3285356	58
4	AI	I	3285508	3285553	45
4	AI	I	3286667	3286746	79
26	AI	I	3299548	3299632	84
7	AI	I	3299724	3299780	56
7	AI	I	3318790	3318855	65
38	AI	I	3322018	3322070	52
39	AI	I	3322331	3322378	47
58	AI	I	333239	333290	51
45	AI	I	3335587	3335686	99
10	AI	I	3335880	3335923	43
11	AI	I	3339177	3339217	40
4	AI	I	3339291	3339347	56
4	AI	I	3344819	3344870	51
121	AI	I	3344908	3345030	122
90	AI	I	3347055	3347120	65
164	AI	I	334782	334829	47
191	AI	I	3352530	3352568	38
8	AI	I	3352693	3352984	291
6	AI	I	3357079	3357128	49
81	AI	I	3366872	3366931	59
259	AI	I	3367020	3367053	33
234	AI	I	3369449	3369515	66
62	AI	I	3377216	3377279	63
91	AI	I	3377366	3377518	152
89	AI	I	3377958	3378003	45
12	AI	I	3380828	3380899	71
147	AI	I	3380984	3381095	111
149	AI	I	3381143	3381198	55
155	AI	I	3381344	3381458	114
156	AI	I	3382404	3382478	74
299	AI	I	3384337	3384744	407
1437	AI	I	3388273	3388316	43
198	AI	I	3388434	3388475	41
216	AI	I	3388779	3388912	133
237	AI	I	3393028	3393124	96
65	AI	I	3393411	3393482	71
81	AI	I	3397327	3397382	55
254	AI	I	3401424	3401470	46
79	AI	I	3401771	3401817	46
74	AI	I	3401913	3401960	47
71	AI	I	3402087	3402137	50
67	AI	I	3402905	3402955	50
42	AI	I	3403049	3403135	86
42	AI	I	3403195	3403239	44
42	AI	I	3403576	3403624	48
37	AI	I	3403729	3403790	61
35	AI	I	3409267	3409426	159
22	AI	I	3412569	3412609	40
73	AI	I	3412731	3412777	46
64	AI	I	3413295	3413368	73
70	AI	I	3413520	3413570	50
70	AI	I	3414238	3414291	53
63	AI	I	3426104	3426210	106
9	AI	I	3428390	3428427	37
22	AI	I	3430343	3430634	291
701	AI	I	3431389	3431480	91
3	AI	I	3438944	3438986	42
14	AI	I	3439620	3439673	53
13	AI	I	3441361	3441486	125
33	AI	I	3441795	3441923	128
136	AI	I	3442048	3442126	78
136	AI	I	3442197	3442247	50
134	AI	I	3444096	3444281	185
116	AI	I	3452269	3452484	215
19	AI	I	3459436	3459491	55
60	AI	I	3459665	3459704	39
56	AI	I	3459897	3459940	43
46	AI	I	3460185	3460233	48
34	AI	I	3460364	3460424	60
5	AI	I	3460442	3460507	65
24	AI	I	346051	346113	62
179	AI	I	3460560	3460641	81
24	AI	I	3461263	3461322	59
19	AI	I	3461583	3461765	182
14	AI	I	346244	346306	62
148	AI	I	3463127	3463258	131
19	AI	I	3463698	3463744	46
21	AI	I	3464259	3464296	37
1	AI	I	346439	346543	104
169	AI	I	3465444	3465541	97
91	AI	I	3466006	3466164	158
91	AI	I	3467475	3467607	132
69	AI	I	3467985	3468031	46
3	AI	I	3469845	3469903	58
49	AI	I	3474631	3474714	83
6	AI	I	3484698	3484735	37
17	AI	I	3485065	3485240	175
18	AI	I	3485342	3485381	39
10	AI	I	3485483	3485581	98
20	AI	I	3485974	3486055	81
25	AI	I	3490684	3490768	84
52	AI	I	3492398	3492466	68
91	AI	I	3493274	3493505	231
37	AI	I	3494071	3494152	81
35	AI	I	3494775	3495046	271
36	AI	I	3496988	3497276	288
2785	AI	I	3499282	3499428	146
2	AI	I	3504269	3504310	41
12	AI	I	3504377	3504421	44
12	AI	I	350511	350574	63
189	AI	I	3505209	3505310	101
33	AI	I	350598	350670	72
178	AI	I	3506093	3506152	59
102	AI	I	3508050	3508093	43
248	AI	I	3509854	3509899	45
27	AI	I	351199	351294	95
216	AI	I	3512794	3512847	53
74	AI	I	3512948	3513000	52
69	AI	I	3514130	3514186	56
58	AI	I	3515854	3515932	78
5	AI	I	351894	351959	65
246	AI	I	3519139	3519226	87
151	AI	I	3520619	3520662	43
58	AI	I	3521206	3521263	57
56	AI	I	3521447	3521492	45
49	AI	I	3522155	3522200	45
36	AI	I	3522287	3522324	37
46	AI	I	3523644	3523924	280
170	AI	I	3523996	3524043	47
149	AI	I	3524162	3524204	42
37	AI	I	3527341	3527383	42
65	AI	I	3527493	3527594	101
65	AI	I	3527862	3528008	146
65	AI	I	3528069	3528106	37
52	AI	I	3528385	3528453	68
1209	AI	I	3528628	3528762	134
1192	AI	I	3530470	3530614	144
118	AI	I	3534738	3534876	138
130	AI	I	3537788	3537984	196
53	AI	I	3544801	3544848	47
54	AI	I	3544920	3544970	50
53	AI	I	3545250	3545314	64
59	AI	I	3545861	3545918	57
51	AI	I	3546701	3546739	38
35	AI	I	3546914	3547051	137
36	AI	I	3547152	3547266	114
32	AI	I	3556282	3556325	43
167	AI	I	3560941	3561256	315
53	AI	I	356433	356510	77
110	AI	I	356592	356634	42
116	AI	I	3567638	3567740	102
82	AI	I	356904	356983	79
108	AI	I	3569092	3569140	48
41	AI	I	3569226	3569291	65
39	AI	I	3569368	3569442	74
35	AI	I	3583995	3584712	717
475	AI	I	3599171	3599240	69
2399	AI	I	3612191	3612236	45
24	AI	I	3612323	3612421	98
28	AI	I	3612486	3612597	111
27	AI	I	3612674	3612876	202
28	AI	I	3619703	3619807	104
164	AI	I	3620143	3620183	40
158	AI	I	3620257	3620370	113
161	AI	I	3620480	3620528	48
130	AI	I	3620554	3620594	40
154	AI	I	3621470	3621513	43
46	AI	I	3622060	3622104	44
40	AI	I	3623005	3623046	41
32	AI	I	3623175	3623308	133
30	AI	I	3623406	3623455	49
30	AI	I	3623542	3623596	54
30	AI	I	3625507	3625554	47
3	AI	I	3628074	3628122	48
389	AI	I	3628743	3628783	40
377	AI	I	3639264	3639385	121
141	AI	I	3643368	3643633	265
22	AI	I	3649601	3649715	114
7	AI	I	3649749	3649798	49
3	AI	I	3649827	3649938	111
5	AI	I	3650058	3650116	58
6	AI	I	3650260	3650337	77
6	AI	I	3655253	3655469	216
1519	AI	I	3658832	3658877	45
198	AI	I	3658961	3659006	45
196	AI	I	3659191	3659270	79
12	AI	I	3659420	3659526	106
9	AI	I	3660438	3660490	52
36	AI	I	3660556	3660606	50
37	AI	I	3666036	3666133	97
42	AI	I	3666223	3666979	756
41	AI	I	3667059	3667112	53
46	AI	I	3667170	3667313	143
46	AI	I	366817	366872	55
264	AI	I	366891	366967	76
244	AI	I	367040	367104	64
260	AI	I	3671096	3671165	69
53	AI	I	3671290	3671333	43
51	AI	I	3671395	3671439	44
50	AI	I	367189	367292	103
223	AI	I	367348	367394	46
286	AI	I	3685989	3686073	84
304	AI	I	3686489	3686529	40
297	AI	I	3686600	3686709	109
312	AI	I	3688806	3689321	515
78	AI	I	3689638	3689721	83
92	AI	I	3690441	3690483	42
106	AI	I	3692884	3692935	51
27	AI	I	3693162	3693302	140
31	AI	I	3697752	3697794	42
45	AI	I	3698368	3698420	52
47	AI	I	3698527	3698569	42
51	AI	I	3699310	3699358	48
67	AI	I	3699538	3699581	43
90	AI	I	3709346	3709498	152
273	AI	I	3711671	3711720	49
29	AI	I	3711861	3711912	51
34	AI	I	3712014	3712066	52
43	AI	I	3712927	3712967	40
53	AI	I	3713096	3713146	50
60	AI	I	3713319	3713378	59
58	AI	I	3714223	3714261	38
20	AI	I	3714301	3714351	50
18	AI	I	3714584	3714627	43
19	AI	I	3714695	3714747	52
23	AI	I	3722808	3722998	190
429	AI	I	3726952	3727007	55
110	AI	I	3727142	3727297	155
47	AI	I	3727525	3727603	78
256	AI	I	3729897	3729983	86
288	AI	I	3730178	3730493	315
291	AI	I	3730596	3730643	47
291	AI	I	3730700	3730903	203
283	AI	I	3731424	3731671	247
117	AI	I	3731692	3731739	47
135	AI	I	3731808	3731892	84
134	AI	I	3735276	3735476	200
52	AI	I	3735517	3735560	43
45	AI	I	3738464	3738504	40
29	AI	I	375830	376093	263
24	AI	I	376446	376843	397
27	AI	I	376931	376992	61
27	AI	I	3791111	3791153	42
200	AI	I	3791851	3791890	39
28	AI	I	3792229	3792266	37
29	AI	I	3795557	3795600	43
9	AI	I	3795684	3795733	49
10	AI	I	3798226	3798347	121
212	AI	I	3799680	3799730	50
53	AI	I	3800135	3800183	48
57	AI	I	3800351	3800392	41
462	AI	I	3800471	3800534	63
477	AI	I	3800617	3800685	68
338	AI	I	3800747	3800799	52
379	AI	I	3801391	3801441	50
80	AI	I	3801589	3801633	44
68	AI	I	3801643	3801683	40
81	AI	I	3804587	3804660	73
500	AI	I	3805930	3806162	232
539	AI	I	3807775	3807830	55
255	AI	I	3807987	3808034	47
244	AI	I	3808393	3808447	54
217	AI	I	3808571	3808634	63
219	AI	I	3814940	3815026	86
41	AI	I	3817803	3817850	47
101	AI	I	3817991	3818034	43
99	AI	I	3818130	3818169	39
108	AI	I	3818907	3818953	46
60	AI	I	3819677	3819719	42
73	AI	I	3820794	3820855	61
99	AI	I	3821033	3821187	154
97	AI	I	3823020	3823058	38
52	AI	I	3823131	3823215	84
58	AI	I	3823886	3823931	45
85	AI	I	3825495	3825552	57
38	AI	I	3831683	3831774	91
133	AI	I	3831956	3832015	59
121	AI	I	3833136	3833201	65
3	AI	I	3833466	3833511	45
5	AI	I	3833942	3833987	45
7	AI	I	3835672	3835718	46
91	AI	I	3835926	3835966	40
59	AI	I	3837519	3837567	48
39	AI	I	3837751	3837810	59
30	AI	I	3837890	3837939	49
39	AI	I	3838770	3838836	66
259	AI	I	3839056	3839105	49
260	AI	I	3839157	3839281	124
242	AI	I	384349	384479	130
156	AI	I	3843577	3843765	188
123	AI	I	3843934	3844014	80
121	AI	I	384590	384985	395
161	AI	I	385060	385124	64
173	AI	I	3853112	3853189	77
117	AI	I	3854745	3854799	54
92	AI	I	385887	385937	50
78	AI	I	3858891	3858934	43
4	AI	I	3859077	3859123	46
5	AI	I	3859227	3859272	45
6	AI	I	386043	386106	63
71	AI	I	3861564	3861630	66
18	AI	I	386394	386457	63
179	AI	I	386614	386785	171
187	AI	I	3869453	3869547	94
160	AI	I	388415	388451	36
42	AI	I	3884687	3884843	156
8	AI	I	388621	388720	99
44	AI	I	388813	388858	45
54	AI	I	3892505	3892544	39
58	AI	I	389564	389616	52
290	AI	I	3896696	3896766	70
103	AI	I	3896863	3896936	73
102	AI	I	3896971	3897017	46
87	AI	I	3897051	3897101	50
99	AI	I	3899153	3899256	103
50	AI	I	3899626	3899673	47
35	AI	I	3908550	3908599	49
29	AI	I	3909568	3909631	63
384	AI	I	3909734	3909872	138
383	AI	I	3910314	3910352	38
348	AI	I	3911784	3911827	43
20	AI	I	3911964	3912016	52
24	AI	I	3912500	3912542	42
17	AI	I	3912916	3913096	180
28	AI	I	3913481	3913543	62
31	AI	I	3914055	3914101	46
33	AI	I	3914790	3914837	47
64	AI	I	3915124	3915165	41
52	AI	I	3915227	3915266	39
33	AI	I	3915360	3915404	44
31	AI	I	3915698	3915745	47
60	AI	I	3915821	3915864	43
56	AI	I	3916072	3916107	35
55	AI	I	3916298	3916339	41
59	AI	I	3916527	3916568	41
54	AI	I	3916873	3916912	39
49	AI	I	3917102	3917139	37
47	AI	I	3917303	3917346	43
43	AI	I	3917459	3917496	37
36	AI	I	3919140	3919202	62
112	AI	I	391915	391955	40
30	AI	I	3923721	3923771	50
101	AI	I	3923885	3923994	109
118	AI	I	392612	392651	39
20	AI	I	392787	392827	40
17	AI	I	3927884	3927968	84
447	AI	I	3933838	3933960	122
12	AI	I	3935481	3935548	67
40	AI	I	3936530	3936596	66
47	AI	I	3942364	3942505	141
344	AI	I	3942669	3942774	105
356	AI	I	394611	394655	44
2	AI	I	3946695	3946737	42
34	AI	I	3948241	3948282	41
16	AI	I	3948358	3948406	48
16	AI	I	3948493	3948537	44
11	AI	I	3948690	3948734	44
6	AI	I	3949921	3949996	75
2	AI	I	395123	395166	43
2	AI	I	3955418	3955464	46
11	AI	I	3955555	3955621	66
12	AI	I	3956300	3956351	51
22	AI	I	3957442	3957511	69
112	AI	I	3957844	3957899	55
120	AI	I	3958004	3958066	62
120	AI	I	3963339	3963390	51
52	AI	I	3963413	3963464	51
51	AI	I	3963609	3963751	142
45	AI	I	396502	396545	43
6	AI	I	396741	396780	39
6	AI	I	3974485	3974540	55
97	AI	I	3974629	3974673	44
111	AI	I	3974775	3974878	103
89	AI	I	3975132	3975192	60
119	AI	I	3975429	3975484	55
117	AI	I	3975832	3975881	49
125	AI	I	3975962	3976013	51
117	AI	I	3980195	3980558	363
11	AI	I	39848	39898	50
1	AI	I	4002860	4002963	103
52	AI	I	4003416	4003466	50
73	AI	I	4005061	4005153	92
53	AI	I	4005273	4005340	67
58	AI	I	4007148	4007591	443
190	AI	I	4012611	4012662	51
19	AI	I	4016190	4016239	49
47	AI	I	401871	401971	100
3	AI	I	4034516	4034577	61
54	AI	I	4034949	4035090	141
49	AI	I	4035164	4035215	51
50	AI	I	4035429	4035478	49
41	AI	I	4035543	4035708	165
27	AI	I	4043554	4043599	45
10	AI	I	4043657	4043748	91
17	AI	I	4043871	4043913	42
17	AI	I	4044133	4044181	48
15	AI	I	4045135	4045176	41
51	AI	I	4046433	4046504	71
31	AI	I	4046970	4047072	102
18	AI	I	4047933	4047979	46
189	AI	I	4047963	4048012	49
4	AI	I	405079	405137	58
44	AI	I	405202	405240	38
46	AI	I	4054068	4054109	41
49	AI	I	4054184	4054233	49
48	AI	I	4054554	4054626	72
43	AI	I	4054800	4054847	47
41	AI	I	4054985	4055081	96
40	AI	I	4055872	4055963	91
31	AI	I	4057015	4057303	288
302	AI	I	405924	405963	39
29	AI	I	406032	406133	101
28	AI	I	406168	406267	99
33	AI	I	406460	406502	42
36	AI	I	4066328	4066386	58
140	AI	I	4066491	4066622	131
123	AI	I	4066652	4066727	75
126	AI	I	4066785	4066836	51
123	AI	I	4066858	4066942	84
104	AI	I	4070172	4070266	94
88	AI	I	4070613	4070650	37
88	AI	I	4074126	4074179	53
51	AI	I	4074291	4074387	96
58	AI	I	4083769	4083947	178
177	AI	I	4087276	4087333	57
8	AI	I	4091357	4091659	302
76	AI	I	4091756	4091821	65
75	AI	I	4092024	4092064	40
65	AI	I	4097374	4097429	55
1623	AI	I	4100014	4100065	51
230	AI	I	4113933	4114108	175
13	AI	I	4117385	4117425	40
21	AI	I	4118200	4118244	44
23	AI	I	4118262	4118307	45
20	AI	I	4118338	4118381	43
15	AI	I	4120030	4120125	95
25	AI	I	4120228	4120269	41
39	AI	I	4120512	4120577	65
40	AI	I	4129597	4129643	46
6	AI	I	4129764	4129836	72
7	AI	I	4132923	4133226	303
433	AI	I	4133299	4133376	77
425	AI	I	4138718	4138979	261
272	AI	I	414629	414683	54
246	AI	I	4146978	4147028	50
164	AI	I	4152345	4152434	89
80	AI	I	415685	415762	77
4	AI	I	4164599	4164656	57
23	AI	I	4166968	4167076	108
24	AI	I	4175508	4175554	46
52	AI	I	418720	418758	38
115	AI	I	419220	419267	47
111	AI	I	419502	419601	99
109	AI	I	4205870	4205936	66
40	AI	I	4207714	4208057	343
137	AI	I	4208500	4208553	53
674	AI	I	4224250	4224581	331
855	AI	I	4227000	4227316	316
37	AI	I	422887	422925	38
7	AI	I	423153	423198	45
10	AI	I	423307	423356	49
10	AI	I	4247474	4247531	57
4	AI	I	4247614	4247704	90
4	AI	I	4256152	4256217	65
87	AI	I	4257132	4257272	140
65	AI	I	4260295	4260350	55
49	AI	I	426069	426105	36
55	AI	I	426322	426363	41
70	AI	I	4264152	4264213	61
66	AI	I	4264326	4264386	60
67	AI	I	4264487	4264544	57
62	AI	I	4267233	4267320	87
393	AI	I	4270554	4270615	61
35	AI	I	4270674	4270735	61
33	AI	I	4276244	4276293	49
102	AI	I	4276680	4276743	63
106	AI	I	4277317	4277369	52
197	AI	I	4277582	4277651	69
189	AI	I	4279405	4279456	51
77	AI	I	427943	427985	42
34	AI	I	428590	428652	62
40	AI	I	4299958	4300021	63
955	AI	I	4305569	4305728	159
318	AI	I	4306038	4306187	149
76	AI	I	4320127	4320186	59
409	AI	I	432982	433027	45
117	AI	I	433113	433153	40
88	AI	I	4336726	4336777	51
1	AI	I	4338815	4338867	52
76	AI	I	434831	434875	44
972	AI	I	4350480	4350521	41
3	AI	I	4351067	4351132	65
548	AI	I	4351278	4351326	48
568	AI	I	4353359	4353409	50
58	AI	I	4355096	4355172	76
83	AI	I	436381	436429	48
17	AI	I	4365734	4365788	54
117	AI	I	4365844	4366008	164
109	AI	I	4366563	4366610	47
144	AI	I	4366693	4366769	76
152	AI	I	436935	437005	70
15	AI	I	4372284	4372346	62
3	AI	I	4372471	4372523	52
3	AI	I	4372590	4372631	41
3	AI	I	4373326	4373370	44
429	AI	I	4374258	4374376	118
325	AI	I	4374691	4374732	41
291	AI	I	437580	437623	43
22	AI	I	437807	437852	45
26	AI	I	4383211	4383264	53
234	AI	I	4383593	4383749	156
259	AI	I	4393572	4393717	145
79	AI	I	4394741	4394798	57
287	AI	I	4394967	4395009	42
273	AI	I	4395092	4395130	38
264	AI	I	4395367	4395415	48
160	AI	I	4395491	4395529	38
230	AI	I	4402143	4402218	75
135	AI	I	4402313	4402364	51
136	AI	I	4404167	4404217	50
24	AI	I	4404376	4404422	46
25	AI	I	4405082	4405124	42
29	AI	I	4405435	4405518	83
27	AI	I	4409096	4409170	74
13	AI	I	4410633	4410688	55
73	AI	I	4415749	4416004	255
1464	AI	I	4416065	4416117	52
1648	AI	I	4416378	4416448	70
1786	AI	I	4423027	4423111	84
99	AI	I	4423190	4423306	116
101	AI	I	4423312	4423365	53
82	AI	I	4423404	4423516	112
95	AI	I	4423557	4423625	68
103	AI	I	4423644	4423692	48
84	AI	I	4423785	4423829	44
112	AI	I	4423964	4424011	47
109	AI	I	4425837	4425892	55
353	AI	I	4425992	4426036	44
358	AI	I	4426110	4426198	88
351	AI	I	4426268	4426458	190
330	AI	I	4426527	4426576	49
334	AI	I	4426601	4426653	52
310	AI	I	4426659	4426699	40
329	AI	I	4426736	4426792	56
323	AI	I	4426878	4426922	44
320	AI	I	4428611	4428688	77
20	AI	I	4429724	4429772	48
17	AI	I	4443233	4443518	285
591	AI	I	4447341	4447399	58
114	AI	I	4450845	4450925	80
14	AI	I	4451864	4451919	55
9	AI	I	4452585	4452640	55
15	AI	I	4468768	4468967	199
1511	AI	I	4473271	4473324	53
369	AI	I	4476474	4476616	142
88	AI	I	4479295	4479376	81
153	AI	I	4479492	4479721	229
145	AI	I	4481012	4481157	145
235	AI	I	4481734	4481892	158
263	AI	I	4484194	4484252	58
226	AI	I	4484321	4484364	43
216	AI	I	4485274	4485349	75
257	AI	I	4485596	4485712	116
221	AI	I	4490106	4490187	81
36	AI	I	4490610	4490647	37
59	AI	I	4490711	4490836	125
55	AI	I	4490914	4490960	46
67	AI	I	4491382	4491431	49
76	AI	I	449241	449294	53
3	AI	I	4497032	4497075	43
49	AI	I	4498435	4498480	45
67	AI	I	4498651	4498757	106
73	AI	I	4500959	4501022	63
635	AI	I	4502430	4502509	79
292	AI	I	4502789	4502994	205
332	AI	I	4504191	4504252	61
2	AI	I	4520827	4520883	56
149	AI	I	4520933	4520976	43
146	AI	I	4521846	4521902	56
49	AI	I	4521992	4522039	47
51	AI	I	4522416	4522464	48
62	AI	I	4522619	4522665	46
37	AI	I	4522676	4522754	78
57	AI	I	4522830	4522876	46
39	AI	I	4544082	4544121	39
11	AI	I	4544233	4544289	56
13	AI	I	4547579	4547624	45
149	AI	I	4548474	4548567	93
95	AI	I	4548616	4548674	58
92	AI	I	4548746	4548787	41
93	AI	I	4557955	4558018	63
431	AI	I	4558342	4558421	79
410	AI	I	4558568	4558610	42
389	AI	I	4581783	4581835	52
61	AI	I	4581919	4581977	58
67	AI	I	4582549	4582594	45
98	AI	I	4582697	4582746	49
76	AI	I	4582767	4582806	39
50	AI	I	4582833	4582868	35
84	AI	I	4582882	4582930	48
79	AI	I	4582963	4583006	43
102	AI	I	4583134	4583173	39
106	AI	I	4583557	4583618	61
110	AI	I	4583696	4583739	43
99	AI	I	4583961	4584010	49
118	AI	I	4584118	4584162	44
116	AI	I	4584676	4584732	56
170	AI	I	4585324	4585370	46
165	AI	I	4585564	4585628	64
199	AI	I	4587390	4587449	59
65	AI	I	4587937	4587982	45
18	AI	I	4588510	4588566	56
21	AI	I	4588723	4588868	145
15	AI	I	4589323	4589409	86
28	AI	I	4596539	4596603	64
260	AI	I	4596799	4596843	44
257	AI	I	4597621	4597679	58
29	AI	I	4602981	4603146	165
189	AI	I	4613686	4613722	36
11	AI	I	4614081	4614151	70
16	AI	I	4614378	4614437	59
19	AI	I	4614954	4614995	41
19	AI	I	4616623	4616667	44
68	AI	I	4617281	4617352	71
73	AI	I	4617935	4617996	61
57	AI	I	4618297	4618359	62
27	AI	I	4639924	4639968	44
323	AI	I	4640020	4640075	55
342	AI	I	4640365	4640446	81
349	AI	I	4645722	4645853	131
48	AI	I	4646589	4646645	56
78	AI	I	4646742	4646793	51
83	AI	I	4649003	4649079	76
480	AI	I	4650764	4650822	58
53	AI	I	4654727	4654766	39
249	AI	I	4654863	4655246	383
317	AI	I	4662577	4662617	40
8	AI	I	4662883	4662921	38
7	AI	I	4663121	4663163	42
13	AI	I	4663204	4663244	40
14	AI	I	4664545	4664585	40
7	AI	I	4664747	4664798	51
13	AI	I	4666668	4666713	45
37	AI	I	4666976	4667015	39
27	AI	I	4669710	4669753	43
20	AI	I	4670862	4670905	43
23	AI	I	4682276	4682328	52
58	AI	I	4685465	4685525	60
9	AI	I	4687477	4687521	44
93	AI	I	4688462	4688512	50
91	AI	I	4705224	4705309	85
225	AI	I	4705762	4705817	55
208	AI	I	4707025	4707078	53
37	AI	I	4707178	4707386	208
37	AI	I	4707460	4707505	45
40	AI	I	4707659	4707732	73
40	AI	I	4718027	4718088	61
91	AI	I	4723048	4723375	327
738	AI	I	4723508	4723637	129
745	AI	I	4726422	4726463	41
33	AI	I	472802	472857	55
14	AI	I	4729783	4729833	50
23	AI	I	4729880	4729919	39
23	AI	I	4730042	4730087	45
26	AI	I	4731893	4731937	44
39	AI	I	4733328	4733425	97
255	AI	I	4733599	4733719	120
235	AI	I	4738147	4738188	41
108	AI	I	4738283	4738329	46
85	AI	I	4738554	4738596	42
97	AI	I	4738740	4738778	38
56	AI	I	4742983	4743034	51
58	AI	I	4743135	4743183	48
66	AI	I	4743272	4743328	56
78	AI	I	4743420	4743469	49
88	AI	I	4744690	4744732	42
21	AI	I	4744828	4744869	41
23	AI	I	4745011	4745139	128
25	AI	I	4746283	4746322	39
55	AI	I	4748206	4748265	59
24	AI	I	4751734	4751809	75
26	AI	I	4751942	4751984	42
28	AI	I	4752034	4752157	123
22	AI	I	4752224	4752291	67
18	AI	I	476053	476098	45
2801	AI	I	4760651	4760751	100
211	AI	I	4763235	4763277	42
257	AI	I	4767141	4767330	189
1026	AI	I	4767348	4767393	45
975	AI	I	4767607	4767710	103
1005	AI	I	4771555	4771610	55
15	AI	I	4773658	4773735	77
19	AI	I	4774260	4774366	106
211	AI	I	4774934	4774990	56
161	AI	I	4775067	4775163	96
139	AI	I	4775894	4775933	39
9	AI	I	4777498	4777536	38
130	AI	I	4777956	4778008	52
130	AI	I	4778147	4778253	106
96	AI	I	4779484	4779522	38
122	AI	I	4779667	4780022	355
63	AI	I	4780185	4780240	55
25	AI	I	4782195	4782242	47
46	AI	I	4783102	4783152	50
197	AI	I	478606	478654	48
39	AI	I	4797376	4797423	47
103	AI	I	4797575	4797620	45
94	AI	I	4797953	4797991	38
79	AI	I	4798103	4798142	39
80	AI	I	4798230	4798275	45
56	AI	I	4798442	4798489	47
63	AI	I	4803315	4803370	55
47	AI	I	4812222	4812301	79
121	AI	I	4812421	4812466	45
125	AI	I	4821594	4821651	57
73	AI	I	482185	482285	100
12	AI	I	4822246	4822300	54
37	AI	I	4822313	4822378	65
51	AI	I	4822487	4822535	48
58	AI	I	4825754	4825917	163
1495	AI	I	4826023	4826074	51
1462	AI	I	4826297	4826342	45
14	AI	I	4831286	4831327	41
22	AI	I	4831968	4832010	42
35	AI	I	4833160	4833256	96
82	AI	I	4835703	4835921	218
91	AI	I	4837267	4837310	43
74	AI	I	4842891	4843135	244
37	AI	I	4843231	4843309	78
40	AI	I	4844140	4844196	56
9	AI	I	4844280	4844332	52
10	AI	I	4845824	4845862	38
221	AI	I	4846063	4846103	40
201	AI	I	4853265	4853302	37
37	AI	I	4853899	4853944	45
48	AI	I	4859813	4859930	117
2	AI	I	4861028	4861186	158
812	AI	I	486131	486187	56
34	AI	I	4861564	4861623	59
18	AI	I	4861756	4861806	50
18	AI	I	4863147	4863232	85
9	AI	I	4864537	4864583	46
346	AI	I	486597	486648	51
19	AI	I	486822	486866	44
16	AI	I	486931	486983	52
17	AI	I	4870525	4870576	51
37	AI	I	4870653	4870822	169
32	AI	I	487093	487132	39
16	AI	I	4872572	4872685	113
51	AI	I	4874289	4874383	94
711	AI	I	4874436	4874604	168
698	AI	I	4874702	4874825	123
678	AI	I	488517	488573	56
4	AI	I	489029	489073	44
48	AI	I	4890373	4890425	52
156	AI	I	4891292	4891364	72
99	AI	I	4891669	4891713	44
90	AI	I	4892892	4892965	73
63	AI	I	4893050	4893097	47
54	AI	I	4893184	4893239	55
44	AI	I	4894405	4894448	43
239	AI	I	4894514	4894619	105
244	AI	I	4894836	4894886	50
224	AI	I	4896084	4896124	40
76	AI	I	4896340	4896409	69
73	AI	I	4898565	4898748	183
43	AI	I	4900585	4900633	48
31	AI	I	4900712	4900756	44
30	AI	I	4901802	4901866	64
35	AI	I	4902001	4902132	131
30	AI	I	490262	490337	75
237	AI	I	4903001	4903045	44
48	AI	I	4903546	4903626	80
4	AI	I	4904040	4904099	59
81	AI	I	4905699	4905773	74
9	AI	I	4906122	4906227	105
5	AI	I	490771	490811	40
244	AI	I	490931	490978	47
255	AI	I	491149	491185	36
256	AI	I	4916841	4916920	79
36	AI	I	4917214	4917285	71
1015	AI	I	491858	491904	46
285	AI	I	4924407	4924460	53
98	AI	I	492476	492511	35
4	AI	I	492630	492672	42
5	AI	I	4926610	4926658	48
68	AI	I	4926729	4926794	65
70	AI	I	4927003	4927095	92
174	AI	I	4927598	4927819	221
146	AI	I	4929100	4929248	148
150	AI	I	4929319	4929362	43
134	AI	I	4929409	4929450	41
152	AI	I	4931351	4931502	151
8	AI	I	4932927	4933015	88
7	AI	I	4934684	4934730	46
11	AI	I	4934768	4934830	62
12	AI	I	4935025	4935081	56
14	AI	I	494615	494666	51
1	AI	I	4948758	4948802	44
165	AI	I	4949874	4949922	48
101	AI	I	4950665	4950728	63
359	AI	I	4950882	4951198	316
341	AI	I	4951565	4951736	171
13	AI	I	4954650	4954695	45
324	AI	I	4954701	4954747	46
313	AI	I	4954879	4955067	188
352	AI	I	4955392	4955437	45
393	AI	I	4968537	4968764	227
18	AI	I	4970005	4970086	81
105	AI	I	4970179	4970243	64
111	AI	I	4971548	4971594	46
94	AI	I	4972662	4972851	189
77	AI	I	4972922	4973016	94
76	AI	I	4973030	4973243	213
94	AI	I	4978754	4978880	126
44	AI	I	4979121	4979164	43
54	AI	I	4980486	4980561	75
100	AI	I	498173	498214	41
105	AI	I	4985906	4986021	115
43	AI	I	4991205	4991275	70
65	AI	I	4991557	4991705	148
69	AI	I	4993934	4994045	111
179	AI	I	4996763	4996903	140
16	AI	I	4997375	4997502	127
38	AI	I	4997719	4997774	55
38	AI	I	4997935	4997987	52
38	AI	I	4998734	4998776	42
45	AI	I	4999017	4999067	50
55	AI	I	4999154	4999206	52
40	AI	I	4999233	4999273	40
47	AI	I	4999672	4999707	35
62	AI	I	5000272	5000324	52
64	AI	I	5000891	5000932	41
60	AI	I	5004694	5004741	47
25	AI	I	5004835	5004902	67
29	AI	I	5004952	5005120	168
28	AI	I	5008344	5008706	362
85	AI	I	5011864	5011915	51
4	AI	I	5012020	5012076	56
4	AI	I	501248	501365	117
126	AI	I	5016026	5016075	49
35	AI	I	5016215	5016261	46
35	AI	I	5016596	5016648	52
26	AI	I	5016943	5016993	50
18	AI	I	5017059	5017137	78
10	AI	I	5017252	5017420	168
2	AI	I	5017433	5017699	266
1	AI	I	5017703	5017781	78
4	AI	I	5018272	5018392	120
613	AI	I	5019670	5019721	51
63	AI	I	5022491	5022725	234
31	AI	I	5023175	5023273	98
312	AI	I	5024944	5024996	52
103	AI	I	5025123	5025278	155
106	AI	I	5027294	5027347	53
368	AI	I	5027727	5027778	51
3	AI	I	5033603	5033655	52
65	AI	I	5037446	5037491	45
14	AI	I	5044231	5044478	247
346	AI	I	5044617	5044667	50
328	AI	I	5051779	5051976	197
22	AI	I	5052018	5052067	49
21	AI	I	5052186	5052235	49
20	AI	I	5054373	5054435	62
144	AI	I	5054554	5054607	53
142	AI	I	5055217	5055256	39
25	AI	I	5059802	5060144	342
36	AI	I	5071417	5071461	44
29	AI	I	5073188	5073388	200
29	AI	I	5073449	5073727	278
30	AI	I	508159	508202	43
176	AI	I	5083607	5083662	55
43	AI	I	5084084	5084128	44
69	AI	I	5088998	5089060	62
61	AI	I	509485	509562	77
125	AI	I	5095301	5095547	246
26	AI	I	509603	509647	44
134	AI	I	5098405	5098506	101
171	AI	I	5098713	5098774	61
159	AI	I	5099512	5099597	85
317	AI	I	5103924	5103965	41
3	AI	I	5104605	5104700	95
34	AI	I	510720	510779	59
62	AI	I	5107454	5107503	49
10	AI	I	5108309	5108356	47
7	AI	I	5110068	5110114	46
5	AI	I	511070	511166	96
61	AI	I	5111536	5111613	77
105	AI	I	5111719	5111789	70
102	AI	I	5113369	5113480	111
35	AI	I	511508	511661	153
1	AI	I	5119830	5119886	56
57	AI	I	5120333	5120440	107
64	AI	I	5132641	5132688	47
102	AI	I	5132794	5132834	40
100	AI	I	5133299	5133339	40
107	AI	I	5133444	5133929	485
99	AI	I	5136362	5136404	42
82	AI	I	513858	513907	49
221	AI	I	513998	514045	47
230	AI	I	514169	514243	74
245	AI	I	5144034	5144327	293
693	AI	I	515082	515221	139
118	AI	I	5153949	5153989	40
35	AI	I	515482	515533	51
119	AI	I	5154942	5154993	51
42	AI	I	515833	515895	62
31	AI	I	5167871	5167914	43
7	AI	I	5182122	5182190	68
126	AI	I	5189768	5189968	200
201	AI	I	5190053	5190124	71
193	AI	I	520694	520799	105
87	AI	I	5206956	5207060	104
22	AI	I	5207201	5207302	101
22	AI	I	521133	521214	81
123	AI	I	5218922	5218961	39
47	AI	I	5219470	5219516	46
43	AI	I	5219847	5219896	49
1	AI	I	52240	52317	77
78	AI	I	5229417	5229466	49
10	AI	I	5229632	5229700	68
9	AI	I	5229903	5229940	37
116	AI	I	5231296	5231336	40
32	AI	I	5231871	5231920	49
39	AI	I	5239047	5239093	46
49	AI	I	5239192	5239235	43
50	AI	I	5246610	5246672	62
72	AI	I	5247923	5248130	207
70	AI	I	5253568	5253611	43
21	AI	I	5253715	5253772	57
24	AI	I	5256843	5257012	169
164	AI	I	5257072	5257341	269
172	AI	I	5260252	5260296	44
29	AI	I	5264817	5264882	65
4	AI	I	5276755	5276826	71
148	AI	I	528064	528123	59
97	AI	I	528269	528325	56
112	AI	I	528460	528566	106
84	AI	I	5285570	5285616	46
6	AI	I	5286181	5286220	39
33	AI	I	528625	528672	47
87	AI	I	5286562	5286608	46
47	AI	I	5286821	5286876	55
59	AI	I	5287556	5287613	57
425	AI	I	5287698	5287850	152
412	AI	I	5288012	5288054	42
415	AI	I	5292938	5293022	84
23	AI	I	5293191	5293460	269
14	AI	I	5299125	5299230	105
71	AI	I	5300843	5300924	81
241	AI	I	5300948	5301115	167
212	AI	I	5301302	5301349	47
250	AI	I	5301379	5301456	77
254	AI	I	5306043	5306102	59
48	AI	I	5306265	5306314	49
40	AI	I	5307048	5307094	46
1	AI	I	5314867	5314913	46
165	AI	I	5315165	5315221	56
313	AI	I	5322722	5322777	55
12	AI	I	5323251	5323311	60
17	AI	I	5324283	5324323	40
31	AI	I	5324408	5324445	37
34	AI	I	5327829	5328100	271
507	AI	I	5329248	5329300	52
605	AI	I	5329432	5329505	73
610	AI	I	5329646	5329712	66
628	AI	I	5329805	5329877	72
644	AI	I	5330779	5330824	45
119	AI	I	5331162	5331217	55
88	AI	I	5331318	5331379	61
80	AI	I	5332283	5332391	108
41	AI	I	5332497	5332551	54
3	AI	I	5332599	5332650	51
43	AI	I	5334260	5334327	67
64	AI	I	5336152	5336211	59
28	AI	I	5350780	5350829	49
2	AI	I	5353425	5353556	131
139	AI	I	5357502	5357557	55
237	AI	I	5357774	5357820	46
250	AI	I	5358080	5358192	112
231	AI	I	5359018	5359073	55
147	AI	I	5359194	5359550	356
162	AI	I	5361331	5361502	171
85	AI	I	5365964	5366339	375
28	AI	I	5367696	5367820	124
73	AI	I	5368091	5368217	126
90	AI	I	5368659	5368700	41
114	AI	I	5368843	5368914	71
118	AI	I	5369559	5369727	168
3	AI	I	5369782	5369973	191
6	AI	I	5370466	5370553	87
20	AI	I	5371540	5371622	82
10	AI	I	5372301	5372355	54
207	AI	I	5372398	5372502	104
[truncated: 3,108 more rows]

## Sheet: Novel canonical
Read count	Type	Chromosome	Coordinate_L	Coordinate_R	length (bp)
2	NIC	I	101746	101815	69
1	NIC	I	1018854	1018910	56
3	NIC	I	1019272	1019338	66
3	NIC	I	1019283	1019375	92
4	NIC	I	1020771	1020819	48
6	NIC	I	1030317	1030369	52
1	NIC	I	1036219	1036308	89
20	NIC	I	1036343	1036383	40
1	NIC	I	1036747	1036870	123
1	NIC	I	1038049	1038115	66
1	NIC	I	1041532	1041672	140
6	NIC	I	1041532	1042069	537
1	NIC	I	1042735	1042793	58
1	NIC	I	1042975	1043035	60
1	NIC	I	1043082	1043127	45
2	NIC	I	1043671	1043746	75
1	NIC	I	1043928	1044000	72
3	NIC	I	1046856	1046913	57
4	NIC	I	1048108	1048709	601
1	NIC	I	1048666	1048709	43
12	NIC	I	1050088	1050180	92
1	NIC	I	1052162	1052330	168
2	NIC	I	1052874	1052928	54
1	NIC	I	1057890	1058004	114
2	NIC	I	1057890	1058007	117
1	NIC	I	1059313	1059356	43
1	NIC	I	1059777	1059843	66
1	NIC	I	1066900	1067030	130
1	NIC	I	1068130	1068250	120
1	NIC	I	1070138	1070204	66
19	NIC	I	1072537	1072907	370
18	NIC	I	1080606	1080670	64
1	NIC	I	1082021	1082080	59
2	NIC	I	109307	109413	106
1	NIC	I	1100249	1100312	63
1	NIC	I	110212	110310	98
3	NIC	I	111849	111920	71
11	NIC	I	1118864	1118920	56
1	NIC	I	111913	111971	58
1	NIC	I	1135888	1135931	43
1	NIC	I	1140711	1140759	48
1	NIC	I	1141582	1141726	144
5	NIC	I	1145696	1145733	37
1	NIC	I	1145791	1145887	96
7	NIC	I	1145838	1145887	49
5	NIC	I	1149236	1149310	74
1	NIC	I	1149751	1149834	83
1	NIC	I	1149957	1150050	93
2	NIC	I	1158527	1158572	45
4	NIC	I	1159126	1159238	112
1	NIC	I	116132	116248	116
1	NIC	I	116429	116477	48
2	NIC	I	1170029	1170168	139
110	NIC	I	1170260	1170306	46
104	NIC	I	1170461	1170522	61
20	NIC	I	1170724	1170767	43
4	NIC	I	1170724	1170791	67
7	NIC	I	1170724	1170800	76
70	NIC	I	1171953	1171998	45
62	NIC	I	1171953	1172015	62
1	NIC	I	1176527	1176578	51
4	NIC	I	1180174	1180238	64
1	NIC	I	1182199	1182272	73
1	NIC	I	1190449	1190506	57
2	NIC	I	1193010	1193067	57
1	NIC	I	1194407	1194913	506
1	NIC	I	1198344	1198392	48
2	NIC	I	1199178	1199297	119
1	NIC	I	1199732	1199814	82
11	NIC	I	1200118	1200311	193
14	NIC	I	1200362	1200570	208
11	NIC	I	1214870	1214948	78
1	NIC	I	1218105	1218182	77
8	NIC	I	1218601	1218649	48
1	NIC	I	1218996	1219054	58
2	NIC	I	1221085	1221122	37
2	NIC	I	1221085	1221141	56
2	NIC	I	1225146	1225195	49
1	NIC	I	1225146	1225291	145
7	NIC	I	1225725	1225823	98
1	NIC	I	123559	123614	55
1	NIC	I	123559	123753	194
1	NIC	I	1236288	1236423	135
1	NIC	I	1237495	1237573	78
3	NIC	I	1242125	1242230	105
2	NIC	I	1271801	1271843	42
1	NIC	I	1272421	1272482	61
1	NIC	I	1279009	1279093	84
3	NIC	I	1280321	1280380	59
14	NIC	I	1280321	1280394	73
1	NIC	I	1283335	1283409	74
1	NIC	I	1283642	1283723	81
1	NIC	I	1283675	1283758	83
1	NIC	I	1292888	1292943	55
1	NIC	I	1296255	1296294	39
1	NIC	I	1300480	1300661	181
1	NIC	I	1300839	1300888	49
2	NIC	I	1317746	1317784	38
2	NIC	I	1321841	1322137	296
1	NIC	I	1322357	1322412	55
1	NIC	I	1323955	1324194	239
1	NIC	I	1339700	1339764	64
1	NIC	I	1344769	1344814	45
3	NIC	I	1353882	1353966	84
1	NIC	I	1354711	1354769	58
1	NIC	I	1356869	1356916	47
1	NIC	I	1367604	1367677	73
1	NIC	I	1368240	1368308	68
1	NIC	I	1368441	1368653	212
1	NIC	I	137012	137074	62
7	NIC	I	1371597	1371673	76
1	NIC	I	1371616	1371673	57
1	NIC	I	1372145	1372280	135
1	NIC	I	1376127	1376172	45
2	NIC	I	1379705	1379761	56
2	NIC	I	1380348	1380421	73
1	NIC	I	1380410	1380464	54
11	NIC	I	1392998	1393044	46
2	NIC	I	13998	14046	48
1	NIC	I	1402464	1402501	37
1	NIC	I	1415326	1421800	6474
1	NIC	I	1424279	1424328	49
3	NIC	I	1424287	1424328	41
5	NIC	I	1440482	1440529	47
1	NIC	I	1449008	1449067	59
1	NIC	I	1454780	1454838	58
10	NIC	I	1470547	1470606	59
3	NIC	I	1481631	1481689	58
1	NIC	I	1485350	1485459	109
1	NIC	I	1487225	1487286	61
1	NIC	I	1489567	1489619	52
3	NIC	I	1494629	1494721	92
1	NIC	I	1495333	1495397	64
3	NIC	I	1502673	1502789	116
4	NIC	I	1502673	1502799	126
52	NIC	I	1502673	1502803	130
1	NIC	I	1504487	1504611	124
1	NIC	I	1504487	1504630	143
11	NIC	I	1514014	1514102	88
3	NIC	I	1514014	1514576	562
1	NIC	I	1514017	1514085	68
2	NIC	I	1514437	1514576	139
1	NIC	I	1545973	1546049	76
10	NIC	I	1545973	1546296	323
2	NIC	I	1557410	1557627	217
1	NIC	I	1558014	1558108	94
1	NIC	I	1558281	1558446	165
3	NIC	I	1569160	1569202	42
1	NIC	I	1573093	1573137	44
1	NIC	I	1575201	1575266	65
1	NIC	I	1575484	1575570	86
3	NIC	I	1575605	1575672	67
1	NIC	I	1575822	1576020	198
1	NIC	I	157711	158255	544
10	NIC	I	1582589	1582656	67
1	NIC	I	158415	158450	35
1	NIC	I	1585322	1585370	48
1	NIC	I	1588443	1588487	44
1	NIC	I	1588758	1588947	189
39	NIC	I	1589391	1589466	75
2	NIC	I	1593905	1593963	58
1	NIC	I	1595362	1595423	61
1	NIC	I	1595362	1595428	66
2	NIC	I	1602379	1602494	115
1	NIC	I	1606909	1606974	65
1	NIC	I	1606914	1606974	60
2	NIC	I	1606933	1606974	41
1	NIC	I	16163	16206	43
7	NIC	I	1619690	1619789	99
1	NIC	I	1619727	1619968	241
1	NIC	I	1622029	1622096	67
4	NIC	I	1631098	1631223	125
1	NIC	I	1632039	1632166	127
1	NIC	I	1633582	1633631	49
1	NIC	I	1640779	1640877	98
1	NIC	I	1646676	1646791	115
1	NIC	I	165068	165116	48
1	NIC	I	1655778	1655819	41
2	NIC	I	1668656	1668709	53
2	NIC	I	1668818	1668930	112
2	NIC	I	1668822	1668930	108
40	NIC	I	1679948	1680061	113
1	NIC	I	1680928	1681116	188
1	NIC	I	1692023	1692077	54
1	NIC	I	1692112	1692164	52
1	NIC	I	1692242	1692279	37
1	NIC	I	1693893	1694083	190
1	NIC	I	1696782	1696831	49
9	NIC	I	1701142	1701449	307
1	NIC	I	1714312	1714373	61
1	NIC	I	1715374	1715431	57
1	NIC	I	1721992	1722069	77
1	NIC	I	1728439	1728487	48
4	NIC	I	1728730	1728776	46
1	NIC	I	1734732	1734782	50
1	NIC	I	1743503	1743572	69
18	NIC	I	1744365	1744589	224
1	NIC	I	1751068	1751120	52
1	NIC	I	1757830	1758095	265
1	NIC	I	1758185	1758240	55
1	NIC	I	1759203	1759264	61
1	NIC	I	1759382	1759446	64
2	NIC	I	1759917	1759985	68
1	NIC	I	1766644	1766725	81
1	NIC	I	1767710	1767765	55
20	NIC	I	1772708	1773263	555
2	NIC	I	1772777	1773263	486
3	NIC	I	1773216	1773263	47
1	NIC	I	1773500	1773547	47
1	NIC	I	1773693	1773741	48
1	NIC	I	1773693	1773769	76
1	NIC	I	1776794	1777068	274
1	NIC	I	1776957	1777044	87
1	NIC	I	1786457	1786512	55
1	NIC	I	1795576	1795630	54
14	NIC	I	1795692	1795794	102
1	NIC	I	1795692	1795814	122
7	NIC	I	1797926	1797971	45
4	NIC	I	1798826	1798959	133
1	NIC	I	1798826	1799026	200
33	NIC	I	1799540	1799679	139
2	NIC	I	1799631	1799679	48
2	NIC	I	180721	180794	73
1	NIC	I	180721	180876	155
2	NIC	I	1808376	1809165	789
1	NIC	I	1808645	1808706	61
1	NIC	I	1808918	1808965	47
11	NIC	I	1808964	1809165	201
1	NIC	I	1809114	1809165	51
1	NIC	I	1814771	1814827	56
2	NIC	I	1824782	1824824	42
3	NIC	I	1826547	1826672	125
1	NIC	I	1826547	1826683	136
2	NIC	I	1826547	1826964	417
1	NIC	I	1840693	1840789	96
1	NIC	I	1844313	1844354	41
4	NIC	I	1855596	1855650	54
4	NIC	I	1856450	1856559	109
1	NIC	I	1861054	1861107	53
2	NIC	I	1861505	1861564	59
3	NIC	I	1861536	1861747	211
1	NIC	I	1863701	1863763	62
16	NIC	I	1864880	1864935	55
1	NIC	I	1865790	1865829	39
5	NIC	I	1865790	1865838	48
1	NIC	I	1865871	1865926	55
1	NIC	I	1866344	1866498	154
1	NIC	I	1874563	1874618	55
1	NIC	I	187860	188050	190
1	NIC	I	187999	188043	44
4	NIC	I	1881526	1881829	303
1	NIC	I	1887407	1887638	231
1	NIC	I	189040	189096	56
6	NIC	I	1892774	1892925	151
3	NIC	I	189348	189392	44
1	NIC	I	1899936	1899978	42
1	NIC	I	190886	190938	52
1	NIC	I	1915745	1915815	70
2	NIC	I	1916387	1916799	412
1	NIC	I	1916647	1916817	170
2	NIC	I	1917575	1917615	40
2	NIC	I	1920180	1920606	426
1	NIC	I	1925296	1925345	49
5	NIC	I	1930905	1930960	55
1	NIC	I	1930936	1931002	66
1	NIC	I	1935131	1935180	49
2	NIC	I	1936234	1936280	46
39	NIC	I	1943627	1943708	81
1	NIC	I	1945844	1945892	48
2	NIC	I	1945846	1945902	56
1	NIC	I	1945859	1945902	43
1	NIC	I	1949839	1949912	73
1	NIC	I	195312	195507	195
1	NIC	I	1966050	1966103	53
1	NIC	I	1966757	1966821	64
1	NIC	I	1967159	1967208	49
1	NIC	I	1967159	1967227	68
1	NIC	I	1975313	1975417	104
1	NIC	I	1977023	1977067	44
3	NIC	I	1981957	1982018	61
1	NIC	I	1984207	1984252	45
6	NIC	I	1984207	1984260	53
1	NIC	I	1985276	1985390	114
1	NIC	I	1985862	1985921	59
3	NIC	I	1996148	1996477	329
2	NIC	I	1996413	1996500	87
1	NIC	I	1996748	1996798	50
1	NIC	I	1998327	1998603	276
1	NIC	I	1999070	1999114	44
2	NIC	I	2000341	2000412	71
11	NIC	I	2008832	2009025	193
6	NIC	I	2008979	2009025	46
7	NIC	I	2014003	2014204	201
1	NIC	I	2014389	2014446	57
2	NIC	I	2016789	2016840	51
3	NIC	I	2018224	2018285	61
112	NIC	I	2018232	2018285	53
4	NIC	I	2018236	2018285	49
9	NIC	I	2018239	2018285	46
14	NIC	I	2018975	2019055	80
1	NIC	I	2028573	2028662	89
1	NIC	I	2028573	2028683	110
4	NIC	I	2029067	2029118	51
1	NIC	I	2029685	2029753	68
1	NIC	I	2034219	2034267	48
2	NIC	I	2034496	2034918	422
1	NIC	I	2041295	2041461	166
1	NIC	I	2044286	2044383	97
1	NIC	I	2047049	2047093	44
1	NIC	I	2058566	2058613	47
5	NIC	I	2058566	2058726	160
10	NIC	I	2066075	2066136	61
758	NIC	I	2066075	2066153	78
1	NIC	I	2066441	2066494	53
1	NIC	I	2066716	2066765	49
21	NIC	I	2066880	2066921	41
13	NIC	I	207007	207099	92
1	NIC	I	2088477	2088526	49
1	NIC	I	2093025	2093084	59
4	NIC	I	2093037	2093084	47
3	NIC	I	2093549	2093648	99
1	NIC	I	2093656	2093695	39
1	NIC	I	2093876	2093934	58
1	NIC	I	2097838	2097891	53
8	NIC	I	2105046	2105089	43
1	NIC	I	2105046	2105135	89
1	NIC	I	2105441	2105538	97
1	NIC	I	2107367	2107859	492
2	NIC	I	2116051	2116192	141
1	NIC	I	2116284	2117673	1389
1	NIC	I	2116411	2116486	75
1	NIC	I	2116626	2116828	202
2	NIC	I	2119283	2119329	46
3	NIC	I	2119792	2119837	45
1	NIC	I	2120125	2120162	37
2	NIC	I	2123356	2123457	101
2	NIC	I	2126391	2126444	53
5	NIC	I	2126696	2126740	44
2	NIC	I	2127685	2127762	77
1	NIC	I	2132426	2132563	137
1	NIC	I	2132453	2132544	91
2	NIC	I	2133660	2133800	140
1	NIC	I	2134785	2134824	39
1	NIC	I	2139181	2139259	78
1	NIC	I	2139464	2139530	66
5	NIC	I	2140757	2141027	270
1	NIC	I	2145851	2145926	75
1	NIC	I	2145957	2146042	85
1	NIC	I	2150882	2150912	30
1	NIC	I	2150882	2150943	61
1	NIC	I	2152141	2152259	118
1	NIC	I	2154223	2154295	72
54	NIC	I	2154771	2154814	43
1	NIC	I	2155191	2155335	144
1	NIC	I	2183439	2184188	749
1	NIC	I	2184884	2184969	85
2	NIC	I	2185313	2185471	158
1	NIC	I	2190177	2190244	67
2	NIC	I	2190639	2190696	57
3	NIC	I	2192059	2192114	55
2	NIC	I	2192059	2192122	63
1	NIC	I	2200071	2200136	65
2	NIC	I	2215735	2215803	68
2	NIC	I	221955	221997	42
1	NIC	I	2230270	2230324	54
1	NIC	I	2238899	2239047	148
2	NIC	I	2240487	2240572	85
3	NIC	I	2245965	2246014	49
1	NIC	I	2252874	2252980	106
3	NIC	I	2259572	2259624	52
2	NIC	I	2261042	2261100	58
2	NIC	I	2261312	2261356	44
1	NIC	I	2262126	2262194	68
1	NIC	I	2276456	2276589	133
1	NIC	I	2277942	2277995	53
1	NIC	I	2280415	2280625	210
2	NIC	I	2280442	2280859	417
1	NIC	I	2281648	2281815	167
1	NIC	I	2282356	2282396	40
1	NIC	I	2290001	2290035	34
1	NIC	I	2298970	2299192	222
2	NIC	I	2299299	2299362	63
1	NIC	I	2299299	2299393	94
1	NIC	I	2303830	2303922	92
2	NIC	I	2304023	2304123	100
1	NIC	I	2309008	2309258	250
3	NIC	I	2309928	2309997	69
1	NIC	I	2311642	2311693	51
1	NIC	I	2313234	2313339	105
1	NIC	I	2313325	2313389	64
1	NIC	I	2313329	2313389	60
3	NIC	I	2315609	2315733	124
5	NIC	I	2324222	2324325	103
4	NIC	I	2324222	2324349	127
3	NIC	I	2326036	2326091	55
1	NIC	I	2326634	2326694	60
1	NIC	I	2326639	2326694	55
2	NIC	I	2326922	2326967	45
3	NIC	I	2332563	2332716	153
1	NIC	I	2335068	2335119	51
2	NIC	I	2339976	2340024	48
2	NIC	I	2339976	2340042	66
3	NIC	I	2340347	2340391	44
5	NIC	I	2344740	2344793	53
16	NIC	I	2344740	2344798	58
2	NIC	I	2346614	2346655	41
1	NIC	I	2347115	2347163	48
1	NIC	I	2347752	2347868	116
1	NIC	I	2348124	2348208	84
1	NIC	I	2348614	2348732	118
1	NIC	I	2351028	2351082	54
2	NIC	I	2356665	2356797	132
1	NIC	I	2356928	2357010	82
1	NIC	I	2365829	2365868	39
1	NIC	I	2366264	2366364	100
1	NIC	I	2371361	2371407	46
2	NIC	I	2376478	2376538	60
1	NIC	I	2376591	2376639	48
1	NIC	I	2376964	2377104	140
1	NIC	I	237980	238039	59
2	NIC	I	237980	238044	64
1	NIC	I	2380371	2380575	204
1	NIC	I	2380873	2381093	220
1	NIC	I	2381046	2381093	47
7	NIC	I	2381208	2381258	50
3	NIC	I	2381213	2381258	45
1	NIC	I	2382989	2383075	86
1	NIC	I	2398949	2399008	59
1	NIC	I	2400393	2400516	123
1	NIC	I	2401389	2401440	51
1	NIC	I	2414950	2415017	67
1	NIC	I	2436241	2436346	105
1	NIC	I	2436605	2436738	133
3	NIC	I	2439657	2439712	55
3	NIC	I	2445412	2445486	74
2	NIC	I	2448434	2448522	88
1	NIC	I	2451467	2451539	72
10	NIC	I	245167	245233	66
8	NIC	I	2460797	2460842	45
2	NIC	I	2462618	2462716	98
1	NIC	I	2469593	2471792	2199
1	NIC	I	2473507	2473563	56
2	NIC	I	247608	247716	108
2	NIC	I	2495166	2495213	47
1	NIC	I	2496849	2496933	84
1	NIC	I	2497485	2497531	46
1	NIC	I	2500041	2500281	240
1	NIC	I	2500228	2500281	53
169	NIC	I	2505448	2505493	45
2	NIC	I	2511121	2511167	46
2	NIC	I	251745	251862	117
674	NIC	I	252057	252141	84
1	NIC	I	2521750	2521802	52
2	NIC	I	252752	252944	192
2	NIC	I	252752	253585	833
1	NIC	I	2531442	2531494	52
1	NIC	I	2532756	2532858	102
1	NIC	I	2538548	2538588	40
1	NIC	I	2539610	2539652	42
9	NIC	I	2542187	2542239	52
1	NIC	I	255818	255869	51
1	NIC	I	256134	256426	292
1	NIC	I	2564184	2564236	52
6	NIC	I	2574735	2574825	90
2	NIC	I	2577265	2577310	45
1	NIC	I	2595844	2595889	45
2	NIC	I	2600008	2600107	99
4	NIC	I	2600008	2600111	103
1	NIC	I	2606104	2606540	436
2	NIC	I	2606317	2606395	78
4	NIC	I	2606367	2606417	50
3	NIC	I	2606367	2606540	173
23	NIC	I	2606431	2606540	109
2	NIC	I	2610203	2610243	40
1	NIC	I	2612767	2612842	75
2	NIC	I	2613293	2613382	89
1	NIC	I	2620520	2620574	54
89	NIC	I	2629985	2630029	44
1	NIC	I	2629985	2630070	85
3	NIC	I	2643683	2643767	84
2	NIC	I	2643795	2643859	64
1	NIC	I	2644811	2644870	59
1	NIC	I	2644811	2645092	281
1	NIC	I	2645171	2645215	44
1	NIC	I	2645201	2645265	64
1	NIC	I	2645311	2645369	58
1	NIC	I	2663651	2663693	42
1	NIC	I	2667217	2667268	51
11	NIC	I	2672783	2672825	42
3	NIC	I	2675388	2675555	167
1	NIC	I	2675398	2675575	177
4	NIC	I	2675504	2675555	51
2	NIC	I	2677377	2677427	50
4	NIC	I	2683407	2683473	66
1	NIC	I	2683588	2683679	91
4	NIC	I	2685270	2685447	177
1	NIC	I	2699446	2699494	48
2	NIC	I	2705024	2705121	97
1	NIC	I	2705361	2705431	70
3	NIC	I	2706691	2706727	36
1	NIC	I	2712705	2712757	52
1	NIC	I	2712880	2712958	78
5	NIC	I	272116	272256	140
3	NIC	I	2723210	2723262	52
1	NIC	I	2723274	2723348	74
3	NIC	I	2723901	2723964	63
2	NIC	I	2724059	2724107	48
1	NIC	I	2724204	2724277	73
7	NIC	I	272572	272614	42
2	NIC	I	2732493	2732544	51
4	NIC	I	2733600	2733777	177
3	NIC	I	2733668	2733777	109
1	NIC	I	2747431	2747648	217
1	NIC	I	2752731	2752790	59
1	NIC	I	2752731	2752916	185
2	NIC	I	2752970	2753020	50
1	NIC	I	2753546	2753625	79
4	NIC	I	2753823	2753905	82
1	NIC	I	2754480	2754543	63
1	NIC	I	2754480	2754607	127
1	NIC	I	2754899	2755237	338
1	NIC	I	2754919	2754967	48
2	NIC	I	2755129	2755191	62
2	NIC	I	2755997	2756082	85
1	NIC	I	2759385	2759478	93
1	NIC	I	2759552	2759648	96
1	NIC	I	2759967	2760117	150
107	NIC	I	2762382	2762429	47
2	NIC	I	2762386	2762458	72
1	NIC	I	2762493	2762535	42
3	NIC	I	2762585	2762786	201
2	NIC	I	2762610	2762661	51
1	NIC	I	2763637	2763857	220
1	NIC	I	2764572	2764871	299
1	NIC	I	2764729	2764790	61
2	NIC	I	2764807	2764871	64
1	NIC	I	2774023	2774077	54
3	NIC	I	2776598	2776649	51
1	NIC	I	2785498	2785541	43
3	NIC	I	2789203	2789245	42
1	NIC	I	2801338	2801375	37
1	NIC	I	2811062	2811101	39
1	NIC	I	2823828	2823886	58
1	NIC	I	2823845	2823886	41
3	NIC	I	282503	282541	38
1	NIC	I	282503	282555	52
1	NIC	I	2828349	2828391	42
1	NIC	I	2829743	2830094	351
7	NIC	I	2830599	2830767	168
1	NIC	I	2835883	2835929	46
2	NIC	I	2846064	2846107	43
4	NIC	I	2849168	2849220	52
2	NIC	I	2855121	2855168	47
2	NIC	I	2860928	2860998	70
1	NIC	I	2861594	2861629	35
1	NIC	I	2868905	2869062	157
1	NIC	I	2872837	2872909	72
1	NIC	I	2881948	2881992	44
61	NIC	I	2886702	2886770	68
142	NIC	I	2886728	2886770	42
3	NIC	I	2892810	2892896	86
5	NIC	I	2893104	2893151	47
3	NIC	I	2893104	2893153	49
1	NIC	I	2893104	2893160	56
1	NIC	I	2912660	2912728	68
1	NIC	I	2912939	2913065	126
1	NIC	I	2913020	2913065	45
1	NIC	I	2917188	2917850	662
1	NIC	I	2918192	2918238	46
1	NIC	I	2919717	2919952	235
1	NIC	I	2954399	2954525	126
1	NIC	I	2957273	2957318	45
1	NIC	I	2957920	2957972	52
1	NIC	I	2958111	2958427	316
1	NIC	I	2989590	2989642	52
4	NIC	I	2990764	2990819	55
7	NIC	I	2990823	2990867	44
1	NIC	I	2996060	2996122	62
7	NIC	I	2996060	2996127	67
2	NIC	I	2996217	2996275	58
1	NIC	I	3001804	3002040	236
8	NIC	I	3001804	3002043	239
1	NIC	I	3004948	3005025	77
9	NIC	I	3005147	3005203	56
1	NIC	I	300541	300603	62
1	NIC	I	3008795	3009146	351
21	NIC	I	3008795	3009311	516
5	NIC	I	3008957	3009159	202
1	NIC	I	3018142	3018198	56
2	NIC	I	3023451	3023506	55
2	NIC	I	303333	303396	63
1	NIC	I	303793	303857	64
2	NIC	I	3039995	3040056	61
1	NIC	I	3040725	3040782	57
1	NIC	I	3044897	3044966	69
12	NIC	I	304570	304673	103
1	NIC	I	3051846	3051894	48
1	NIC	I	3052008	3052183	175
1	NIC	I	3059304	3059395	91
2	NIC	I	306264	306315	51
1	NIC	I	3075347	3075428	81
1	NIC	I	3075353	3075395	42
1	NIC	I	3075713	3075891	178
5	NIC	I	3084759	3084815	56
1	NIC	I	3087330	3087383	53
1	NIC	I	3087330	3087385	55
1	NIC	I	3087587	3087621	34
1	NIC	I	3087587	3087894	307
1	NIC	I	3094155	3094205	50
1	NIC	I	3094155	3094228	73
2	NIC	I	309719	309758	39
104	NIC	I	309719	309863	144
26	NIC	I	309719	309888	169
6	NIC	I	3098578	3098625	47
1	NIC	I	3098789	3098829	40
1	NIC	I	3104095	3104274	179
2	NIC	I	3104424	3104487	63
1	NIC	I	3105686	3105732	46
68	NIC	I	3105686	3105866	180
1	NIC	I	3108691	3108741	50
1	NIC	I	3109264	3109341	77
4	NIC	I	3109264	3109354	90
1	NIC	I	3109312	3109371	59
13	NIC	I	3109527	3109605	78
6	NIC	I	311187	311298	111
1	NIC	I	3114302	3114362	60
2	NIC	I	3114973	3115039	66
2	NIC	I	3114973	3115112	139
1	NIC	I	312054	312114	60
1	NIC	I	312064	312114	50
4	NIC	I	3122719	3122923	204
2	NIC	I	3129116	3129422	306
1	NIC	I	3129662	3129757	95
1	NIC	I	3129940	3129989	49
1	NIC	I	313748	313846	98
1	NIC	I	3141603	3141655	52
1	NIC	I	3141751	3141795	44
1	NIC	I	3141751	3141813	62
4	NIC	I	314242	314342	100
1	NIC	I	314242	314345	103
3	NIC	I	3150988	3151160	172
1	NIC	I	3152972	3153039	67
2	NIC	I	315350	315550	200
1	NIC	I	315755	315806	51
1	NIC	I	3159405	3159459	54
2	NIC	I	316229	316375	146
1	NIC	I	3162443	3162542	99
2	NIC	I	3169510	3169561	51
1	NIC	I	3169510	3169578	68
2	NIC	I	3172857	3172985	128
1	NIC	I	3172971	3173051	80
1	NIC	I	3178116	3178178	62
1	NIC	I	3178668	3178854	186
4	NIC	I	3180055	3180108	53
6	NIC	I	3185381	3185700	319
4	NIC	I	318544	318676	132
1	NIC	I	318544	318679	135
1	NIC	I	3199995	3200060	65
1	NIC	I	3206995	3207134	139
1	NIC	I	3207075	3207134	59
1	NIC	I	3208635	3208709	74
1	NIC	I	3208787	3208830	43
1	NIC	I	3221603	3221794	191
3	NIC	I	3221607	3221794	187
3	NIC	I	3221620	3221666	46
2	NIC	I	3221620	3221776	156
1	NIC	I	3232959	3233002	43
2	NIC	I	3238281	3238334	53
3	NIC	I	3241469	3241536	67
3	NIC	I	3241576	3241672	96
1	NIC	I	3241743	3241791	48
1	NIC	I	3247580	3247620	40
1	NIC	I	3250778	3250842	64
1	NIC	I	325158	325224	66
2	NIC	I	325166	325220	54
1	NIC	I	3253295	3253359	64
2	NIC	I	3253338	3253439	101
1	NIC	I	325482	325517	35
1	NIC	I	3259372	3259441	69
1	NIC	I	3273857	3273897	40
1	NIC	I	3277815	3277873	58
1	NIC	I	3279246	3279285	39
1	NIC	I	3279819	3279902	83
1	NIC	I	3286667	3286757	90
1	NIC	I	3293646	3293950	304
5	NIC	I	3301186	3301253	67
3	NIC	I	3301191	3301229	38
2	NIC	I	3301191	3301253	62
19	NIC	I	3309909	3309966	57
1	NIC	I	3325221	3325279	58
9	NIC	I	3325221	3325283	62
5	NIC	I	3337534	3337575	41
1	NIC	I	334000	334040	40
1	NIC	I	3344908	3344951	43
3	NIC	I	334908	334965	57
1	NIC	I	3357068	3357143	75
1	NIC	I	3366895	3367053	158
1	NIC	I	3367325	3367513	188
1	NIC	I	3372840	3372880	40
2	NIC	I	3375539	3375674	135
10	NIC	I	3375990	3376197	207
1	NIC	I	3377674	3377746	72
1	NIC	I	3380022	3380064	42
2	NIC	I	3380022	3380084	62
2	NIC	I	3380845	3380899	54
1	NIC	I	3380998	3381095	97
2	NIC	I	3381028	3381095	67
1	NIC	I	3383528	3383580	52
1	NIC	I	3389364	3389571	207
4	NIC	I	3392364	3392416	52
1	NIC	I	3392842	3392920	78
1	NIC	I	3393705	3393765	60
75	NIC	I	3393923	3393966	43
46	NIC	I	3397786	3397837	51
3	NIC	I	3400692	3400802	110
1	NIC	I	3401400	3401470	70
1	NIC	I	3403749	3403790	41
1	NIC	I	3407943	3408126	183
1	NIC	I	3426166	3426210	44
1	NIC	I	3429540	3429588	48
1	NIC	I	3440714	3440776	62
1	NIC	I	3441170	3441213	43
1	NIC	I	3441621	3441662	41
1	NIC	I	3456430	3456481	51
3	NIC	I	3459433	3459491	58
1	NIC	I	3459571	3459617	46
3	NIC	I	3460372	3460424	52
19	NIC	I	3460434	3460507	73
1	NIC	I	346439	346497	58
2	NIC	I	3465444	3465768	324
1	NIC	I	3466483	3466551	68
1	NIC	I	3466587	3466771	184
33	NIC	I	346744	346799	55
15	NIC	I	3467674	3467733	59
1	NIC	I	3478709	3478877	168
4	NIC	I	3478785	3478877	92
1	NIC	I	3496988	3497265	277
4	NIC	I	3505000	3505063	63
27	NIC	I	3506001	3506055	54
4	NIC	I	3523458	3523924	466
3	NIC	I	3524162	3524314	152
4	NIC	I	352997	353035	38
3	NIC	I	3533413	3533476	63
1	NIC	I	3534124	3534198	74
32	NIC	I	3536617	3536730	113
13	NIC	I	3536658	3536730	72
1	NIC	I	3537788	3537993	205
2	NIC	I	3548234	3548295	61
1	NIC	I	3560941	3561006	65
1	NIC	I	356418	356510	92
2	NIC	I	356590	356634	44
5	NIC	I	356904	357119	215
1	NIC	I	3569658	3569724	66
1	NIC	I	3569658	3569782	124
2	NIC	I	357040	357119	79
30	NIC	I	3583995	3584540	545
2	NIC	I	3583995	3584578	583
1	NIC	I	3583995	3585191	1196
1	NIC	I	3584176	3584712	536
1	NIC	I	3585062	3585106	44
1	NIC	I	3585784	3585931	147
2	NIC	I	3586866	3586928	62
1	NIC	I	358897	358945	48
1	NIC	I	3596218	3596355	137
2	NIC	I	3600608	3600659	51
1	NIC	I	3601888	3601958	70
2	NIC	I	3605689	3605747	58
1	NIC	I	3616564	3616640	76
2	NIC	I	3618358	3618401	43
1	NIC	I	3619030	3619093	63
3	NIC	I	3625159	3625206	47
1	NIC	I	3625460	3625554	94
1	NIC	I	3628074	3628158	84
3	NIC	I	3628083	3628158	75
8	NIC	I	3635380	3635487	107
6	NIC	I	3635380	3635608	228
1	NIC	I	3654718	3654802	84
5	NIC	I	3659424	3659526	102
1	NIC	I	366817	366967	150
2	NIC	I	366817	367104	287
2	NIC	I	367040	367122	82
1	NIC	I	3674818	3674865	47
7	NIC	I	368142	368312	170
16	NIC	I	3685987	3686073	86
1	NIC	I	3686928	3686997	69
2	NIC	I	3697928	3698022	94
2	NIC	I	3697989	3698071	82
1	NIC	I	3709368	3709498	130
3	NIC	I	3710000	3710038	38
1	NIC	I	3710099	3710147	48
1	NIC	I	3710109	3710147	38
1	NIC	I	3711381	3711425	44
1	NIC	I	3712941	3713047	106
1	NIC	I	3721505	3721578	73
2	NIC	I	3721531	3721578	47
1	NIC	I	3722142	3722191	49
1	NIC	I	3727154	3727297	143
22	NIC	I	3727231	3727297	66
2	NIC	I	3727250	3727297	47
10	NIC	I	3727254	3727297	43
26	NIC	I	3727525	3727568	43
7	NIC	I	3729731	3729777	46
40	NIC	I	3731424	3731467	43
8	NIC	I	3731680	3731731	51
2	NIC	I	3731692	3731756	64
3	NIC	I	3731694	3731739	45
1	NIC	I	3732089	3732137	48
6	NIC	I	3742642	3742716	74
1	NIC	I	3745861	3745969	108
2	NIC	I	375830	375991	161
2	NIC	I	375830	376089	259
1	NIC	I	3791111	3791166	55
11	NIC	I	3799145	3799209	64
1	NIC	I	3800135	3800188	53
1	NIC	I	3800747	3800788	41
2	NIC	I	3800747	3800854	107
1	NIC	I	3801643	3801696	53
1	NIC	I	3801814	3802019	205
4	NIC	I	3803619	3803708	89
3	NIC	I	3804250	3804290	40
28	NIC	I	3805012	3805076	64
4	NIC	I	3809238	3809293	55
2	NIC	I	3809238	3809311	73
2	NIC	I	3811662	3811715	53
15	NIC	I	3817586	3817850	264
2	NIC	I	3817586	3818034	448
1	NIC	I	3817991	3818037	46
4	NIC	I	3818609	3818653	44
1	NIC	I	3818677	3818744	67
1	NIC	I	3818907	3818950	43
4	NIC	I	3819346	3819413	67
1	NIC	I	3822455	3822586	131
31	NIC	I	3822455	3822686	231
2	NIC	I	3826013	3826049	36
1	NIC	I	3831245	3831287	42
1	NIC	I	3831935	3832015	80
1	NIC	I	3836316	3836395	79
1	NIC	I	3838230	3838315	85
12	NIC	I	3840898	3840984	86
1	NIC	I	384884	384985	101
1	NIC	I	3854738	3854799	61
2	NIC	I	385887	386106	219
3	NIC	I	3861298	3861345	47
7	NIC	I	3861302	3861345	43
8	NIC	I	3864067	3864115	48
1	NIC	I	388415	388720	305
1	NIC	I	3885694	3885746	52
18	NIC	I	3889966	3890126	160
1	NIC	I	3892156	3892218	62
12	NIC	I	3892501	3892544	43
3	NIC	I	389504	389684	180
7	NIC	I	3914465	3914516	51
2	NIC	I	3915124	3915266	142
4	NIC	I	3917454	3917496	42
3	NIC	I	3930281	3930376	95
2	NIC	I	3939243	3939559	316
1	NIC	I	3942664	3942774	110
1	NIC	I	3942852	3942891	39
1	NIC	I	3948676	3948734	58
3	NIC	I	3949046	3949093	47
6	NIC	I	3953559	3953608	49
1	NIC	I	3957468	3957511	43
2	NIC	I	3962760	3962836	76
1	NIC	I	3968321	3968367	46
1	NIC	I	3969410	3969452	42
1	NIC	I	3970029	3970065	36
1	NIC	I	3974456	3974507	51
1	NIC	I	3974485	3974542	57
4	NIC	I	3974485	3974673	188
2	NIC	I	3974598	3974673	75
1	NIC	I	397639	397688	49
1	NIC	I	3980195	3980371	176
1	NIC	I	3981527	3981586	59
2	NIC	I	3981527	3981589	62
15	NIC	I	3981542	3981589	47
1	NIC	I	398791	398837	46
3	NIC	I	4003525	4003619	94
1	NIC	I	4004746	4004786	40
3	NIC	I	4004860	4004900	40
8	NIC	I	4004860	4004909	49
1	NIC	I	4005265	4005311	46
1	NIC	I	4012615	4012662	47
2	NIC	I	4012954	4013098	144
4	NIC	I	4013044	4013098	54
1	NIC	I	4015005	4015059	54
1	NIC	I	4018263	4018379	116
3	NIC	I	4018266	4018379	113
2	NIC	I	4018545	4018745	200
2	NIC	I	4018673	4018745	72
1	NIC	I	403072	403162	90
1	NIC	I	4034968	4035090	122
1	NIC	I	4035533	4035708	175
1	NIC	I	403564	403611	47
1	NIC	I	4043554	4043658	104
1	NIC	I	4045290	4045380	90
1	NIC	I	4047556	4047614	58
5	NIC	I	4050945	4051032	87
1	NIC	I	4050945	4051042	97
1	NIC	I	4054068	4054233	165
1	NIC	I	4054187	4054233	46
2	NIC	I	4054712	4054758	46
1	NIC	I	4054868	4054926	58
1	NIC	I	4055498	4055678	180
1	NIC	I	4055798	4055977	179
1	NIC	I	4056352	4056414	62
1	NIC	I	4059316	4059431	115
2	NIC	I	4059584	4059666	82
3	NIC	I	4059584	4059840	256
1	NIC	I	4066488	4066622	134
3	NIC	I	4066646	4066727	81
2	NIC	I	4066652	4066836	184
8	NIC	I	4066888	4066942	54
1	NIC	I	4083801	4083947	146
1	NIC	I	4089459	4089519	60
1	NIC	I	4117139	4117184	45
1	NIC	I	4118262	4118381	119
3	NIC	I	411934	412018	84
1	NIC	I	4119806	4119956	150
1	NIC	I	4121935	4122027	92
1	NIC	I	4123988	4124065	77
1	NIC	I	4127413	4127477	64
1	NIC	I	4128985	4129046	61
5	NIC	I	4128990	4129046	56
5	NIC	I	4129006	4129046	40
1	NIC	I	4141273	4141333	60
2	NIC	I	4143398	4143450	52
1	NIC	I	4151045	4151087	42
1	NIC	I	4151362	4151410	48
2	NIC	I	4154590	4154643	53
1	NIC	I	4155393	4155537	144
1	NIC	I	4155393	4155540	147
6	NIC	I	4162499	4162567	68
2	NIC	I	4173078	4173180	102
2	NIC	I	417652	417802	150
1	NIC	I	419054	419127	73
7	NIC	I	419217	419267	50
1	NIC	I	4238050	4238123	73
1	NIC	I	4238050	4238161	111
1	NIC	I	4238234	4238361	127
2	NIC	I	4250953	4250975	22
1	NIC	I	4257193	4257272	79
3	NIC	I	4257975	4258014	39
1	NIC	I	426069	426112	43
1	NIC	I	4288286	4288337	51
3	NIC	I	429572	429704	132
1	NIC	I	429578	429704	126
2	NIC	I	4298090	4298177	87
1	NIC	I	4303260	4303305	45
1	NIC	I	4304674	4304810	136
2	NIC	I	4319446	4319508	62
1	NIC	I	432586	432743	157
1	NIC	I	4327088	4327186	98
1	NIC	I	4329105	4329368	263
1	NIC	I	433107	433153	46
3	NIC	I	4336574	4336621	47
2	NIC	I	4336723	4336777	54
2	NIC	I	433832	433883	51
1	NIC	I	434193	434339	146
1	NIC	I	434267	434317	50
5	NIC	I	434267	434339	72
5	NIC	I	434956	434988	32
3	NIC	I	435661	435707	46
1	NIC	I	4357287	4357370	83
2	NIC	I	4357290	4357340	50
1	NIC	I	4357290	4357370	80
5	NIC	I	4365844	4366011	167
1	NIC	I	4366472	4366519	47
1	NIC	I	4366487	4366537	50
1	NIC	I	4366905	4366959	54
4	NIC	I	4366992	4367061	69
3	NIC	I	4366992	4367086	94
3	NIC	I	4366992	4367089	97
2	NIC	I	4367006	4367061	55
1	NIC	I	437580	437633	53
1	NIC	I	437797	437836	39
7	NIC	I	4383645	4383749	104
1	NIC	I	438435	438511	76
1	NIC	I	438881	439117	236
11	NIC	I	439357	439423	66
1	NIC	I	4395361	4395415	54
1	NIC	I	4395476	4395529	53
2	NIC	I	4395478	4395529	51
1	NIC	I	439558	439613	55
38	NIC	I	439837	439897	60
1	NIC	I	439857	439897	40
9	NIC	I	4400950	4401009	59
24	NIC	I	4401445	4401501	56
2	NIC	I	4401545	4401591	46
2	NIC	I	4401877	4401929	52
1	NIC	I	4402143	4402364	221
1	NIC	I	4405475	4405518	43
1	NIC	I	4406464	4406549	85
1	NIC	I	4415796	4416004	208
3	NIC	I	4415837	4416004	167
8	NIC	I	4416065	4416448	383
1	NIC	I	4416364	4416448	84
2	NIC	I	4416382	4416448	66
1	NIC	I	4416401	4416448	47
1	NIC	I	4416487	4416551	64
1	NIC	I	4416757	4416818	61
1	NIC	I	4416757	4416851	94
2	NIC	I	4416757	4416876	119
1	NIC	I	4423027	4423306	279
1	NIC	I	4423211	4423306	95
1	NIC	I	4425840	4425892	52
10	NIC	I	4426599	4426792	193
2	NIC	I	4427156	4427198	42
1	NIC	I	4428914	4428970	56
2	NIC	I	4436282	4436337	55
1	NIC	I	4468654	4468724	70
1	NIC	I	4468768	4468818	50
21	NIC	I	4468768	4468837	69
1	NIC	I	4472697	4472785	88
30	NIC	I	4472728	4472785	57
1	NIC	I	4473755	4473804	49
3	NIC	I	4473834	4473876	42
4	NIC	I	4475741	4475873	132
1	NIC	I	4476474	4476519	45
6	NIC	I	4479474	4479721	247
1	NIC	I	4479492	4479571	79
1	NIC	I	4479492	4479734	242
1	NIC	I	4481012	4481058	46
11	NIC	I	4485274	4485712	438
1	NIC	I	4485294	4485349	55
1	NIC	I	4498160	4498207	47
2	NIC	I	4501085	4501151	66
1	NIC	I	4507238	4507304	66
1	NIC	I	4507383	4507435	52
2	NIC	I	4507395	4507435	40
1	NIC	I	4507827	4508112	285
1	NIC	I	4508378	4508511	133
6	NIC	I	4521846	4522039	193
1	NIC	I	4521855	4521902	47
1	NIC	I	4522604	4522665	61
1	NIC	I	4522830	4522872	42
2	NIC	I	4522921	4522964	43
14	NIC	I	4531630	4531673	43
15	NIC	I	4531933	4532247	314
1	NIC	I	4541194	4541241	47
1	NIC	I	4542461	4542514	53
3	NIC	I	4556388	4556430	42
1	NIC	I	4558554	4558610	56
1	NIC	I	4559696	4559748	52
1	NIC	I	4576693	4576743	50
4	NIC	I	4582692	4582746	54
2	NIC	I	4582692	4582868	176
4	NIC	I	4582692	4582930	238
2	NIC	I	4582697	4582806	109
1	NIC	I	4582697	4582868	171
3	NIC	I	4582767	4582868	101
1	NIC	I	4583557	4583601	44
1	NIC	I	4583848	4583926	78
1	NIC	I	4585048	4585087	39
2	NIC	I	4585314	4585370	56
1	NIC	I	4587691	4587772	81
2	NIC	I	4588073	4588114	41
1	NIC	I	4588390	4588449	59
1	NIC	I	4588755	4588868	113
1	NIC	I	4592955	4593034	79
1	NIC	I	4593099	4593154	55
1	NIC	I	4593112	4593166	54
1	NIC	I	4594665	4594725	60
1	NIC	I	4596520	4596603	83
1	NIC	I	4596539	4596843	304
1	NIC	I	4612351	4612418	67
1	NIC	I	4635279	4635509	230
3	NIC	I	4637243	4637289	46
12	NIC	I	4637451	4637509	58
18	NIC	I	4637609	4637681	72
16	NIC	I	4638146	4638190	44
1	NIC	I	4639777	4639826	49
1	NIC	I	4639924	4640075	151
6	NIC	I	4642154	4642195	41
5	NIC	I	4648275	4648342	67
1	NIC	I	4653234	4653282	48
116	NIC	I	4653234	4653298	64
1	NIC	I	4654248	4654366	118
1	NIC	I	4654727	4654787	60
2	NIC	I	4655071	4655246	175
1	NIC	I	4669710	4669770	60
3	NIC	I	4669710	4669781	71
1	NIC	I	4669710	4669862	152
1	NIC	I	4673769	4673830	61
1	NIC	I	4674187	4674234	47
1	NIC	I	467493	467568	75
1	NIC	I	4675733	4675799	66
1	NIC	I	468251	468294	43
2	NIC	I	468372	468462	90
8	NIC	I	4691394	4691445	51
3	NIC	I	4693118	4693243	125
1	NIC	I	4693552	4693631	79
1	NIC	I	4699449	4699506	57
2	NIC	I	4699715	4699850	135
1	NIC	I	4702294	4702367	73
1	NIC	I	4707025	4707386	361
1	NIC	I	4707846	4708098	252
1	NIC	I	4716540	4716625	85
1	NIC	I	4723048	4723189	141
36	NIC	I	4723508	4723574	66
66	NIC	I	4723508	4723650	142
3	NIC	I	4738141	4738188	47
5	NIC	I	4738147	4738596	449
1	NIC	I	4738734	4738778	44
3	NIC	I	4743135	4743328	193
1	NIC	I	4743314	4743365	51
1	NIC	I	4743787	4743859	72
1	NIC	I	4748645	4748687	42
4	NIC	I	4748926	4748990	64
1	NIC	I	4752667	4752712	45
1	NIC	I	4753939	4753993	54
1	NIC	I	4760675	4760751	76
1	NIC	I	4764745	4764914	169
1	NIC	I	4767141	4767710	569
1	NIC	I	4767336	4767393	57
1	NIC	I	4772655	4772702	47
1	NIC	I	4773049	4773096	47
4	NIC	I	4774260	4774351	91
1	NIC	I	4775534	4775588	54
1	NIC	I	4775894	4775970	76
1	NIC	I	4779484	4780022	538
1	NIC	I	4779885	4780022	137
7	NIC	I	4779947	4779998	51
1	NIC	I	4780100	4780138	38
1	NIC	I	4780271	4780315	44
1	NIC	I	4780464	4780530	66
1	NIC	I	4781049	4781242	193
1	NIC	I	4781766	4782045	279
1	NIC	I	4782005	4782045	40
1	NIC	I	4783102	4783168	66
1	NIC	I	4788323	4788364	41
1	NIC	I	4790843	4790884	41
1	NIC	I	4796654	4796854	200
1	NIC	I	4798054	4798144	90
2	NIC	I	4817729	4817788	59
4	NIC	I	482140	482285	145
1	NIC	I	4825005	4825076	71
1	NIC	I	4825026	4825076	50
1	NIC	I	4825170	4825457	287
2	NIC	I	4825754	4825818	64
2	NIC	I	4826013	4826074	61
1	NIC	I	4826656	4826695	39
1	NIC	I	4835874	4835921	47
1	NIC	I	4838564	4838614	50
1	NIC	I	4838868	4838908	40
1	NIC	I	4844145	4844196	51
1	NIC	I	4844280	4844341	61
3	NIC	I	4845430	4845496	66
1	NIC	I	4851532	4851582	50
1	NIC	I	4851532	4851603	71
16	NIC	I	4851557	4851603	46
1	NIC	I	4851955	4852046	91
1	NIC	I	4852237	4852394	157
1	NIC	I	4852428	4852477	49
1	NIC	I	4861028	4861330	302
11	NIC	I	4861138	4861186	48
4	NIC	I	4861145	4861186	41
1	NIC	I	4863960	4864001	41
7	NIC	I	4864355	4864458	103
4	NIC	I	4864523	4864583	60
1	NIC	I	486592	486648	56
1	NIC	I	4867528	4867875	347
1	NIC	I	4867875	4868231	356
1	NIC	I	4870653	4870780	127
2	NIC	I	4874777	4874825	48
1	NIC	I	4875051	4875116	65
7	NIC	I	4880993	4881037	44
1	NIC	I	488498	488573	75
1	NIC	I	4892892	4893006	114
1	NIC	I	4896334	4896409	75
2	NIC	I	4900585	4900642	57
1	NIC	I	490252	490337	85
1	NIC	I	4903217	4903277	60
8	NIC	I	4903217	4903720	503
1	NIC	I	490931	490997	66
1	NIC	I	490931	491185	254
1	NIC	I	4911753	4912135	382
207	NIC	I	4916829	4916920	91
4	NIC	I	4916841	4916942	101
1	NIC	I	492007	492066	59
2	NIC	I	4925899	4925943	44
1	NIC	I	4926369	4926413	44
24	NIC	I	4926449	4926658	209
1	NIC	I	4926597	4926698	101
1	NIC	I	4927598	4927642	44
1	NIC	I	4927598	4927667	69
1	NIC	I	4929319	4929376	57
1	NIC	I	4929319	4929378	59
2	NIC	I	4937013	4937199	186
51	NIC	I	4938932	4939056	124
2	NIC	I	4940653	4941358	705
1	NIC	I	4955392	4955459	67
1	NIC	I	4964649	4964697	48
1	NIC	I	4972662	4972738	76
1	NIC	I	4977996	4978147	151
2	NIC	I	4978271	4978418	147
1	NIC	I	4979121	4979166	45
2	NIC	I	497943	498006	63
1	NIC	I	4979470	4979535	65
2	NIC	I	4980650	4980697	47
5	NIC	I	4980650	4980704	54
1	NIC	I	4985927	4986021	94
1	NIC	I	5000888	5000932	44
1	NIC	I	5002018	5002059	41
2	NIC	I	5002114	5002180	66
1	NIC	I	5005973	5006018	45
1	NIC	I	5008706	5008747	41
1	NIC	I	5011213	5011400	187
1	NIC	I	5017127	5017263	136
1	NIC	I	5017544	5017713	169
1	NIC	I	5017694	5017781	87
2	NIC	I	5022382	5022438	56
1	NIC	I	5026332	5026423	91
1	NIC	I	502790	502878	88
1	NIC	I	502821	502878	57
1	NIC	I	5037446	5038925	1479
2	NIC	I	5043038	5043117	79
1	NIC	I	5044924	5044991	67
1	NIC	I	5065610	5065651	41
1	NIC	I	5065705	5065759	54
1	NIC	I	5075533	5075763	230
1	NIC	I	5075533	5075767	234
3	NIC	I	5098405	5098484	79
1	NIC	I	5098405	5098774	369
1	NIC	I	5099512	5099599	87
1	NIC	I	5111528	5111613	85
1	NIC	I	5119565	5119618	53
7	NIC	I	5119830	5120440	610
1	NIC	I	5125218	5125310	92
41	NIC	I	5125262	5125310	48
26	NIC	I	5132987	5133094	107
4	NIC	I	5133292	5133339	47
1	NIC	I	5133801	5133929	128
2	NIC	I	513858	513915	57
2	NIC	I	5144193	5144327	134
1	NIC	I	515082	515236	154
1	NIC	I	5172807	5172953	146
1	NIC	I	5173986	5174376	390
1	NIC	I	5175017	5175065	48
1	NIC	I	5188415	5188625	210
1	NIC	I	5206156	5206201	45
2	NIC	I	520694	520804	110
1	NIC	I	5229634	5229700	66
1	NIC	I	5230091	5230526	435
1	NIC	I	5230595	5230710	115
5	NIC	I	5230870	5230912	42
4	NIC	I	5235632	5235687	55
2	NIC	I	5248063	5248130	67
1	NIC	I	5248394	5248446	52
1	NIC	I	52534	52590	56
1	NIC	I	52537	52590	53
13	NIC	I	526692	526854	162
34	NIC	I	526904	527087	183
21	NIC	I	526904	527100	196
10	NIC	I	527166	527322	156
34	NIC	I	527336	527542	206
5	NIC	I	527591	527768	177
23	NIC	I	5276733	5276782	49
1	NIC	I	5276959	5277043	84
3	NIC	I	528269	528566	297
1	NIC	I	528448	528566	118
1	NIC	I	5286562	5286605	43
5	NIC	I	5292938	5292993	55
1	NIC	I	5292969	5293022	53
1	NIC	I	5293191	5293469	278
2	NIC	I	529635	529678	43
5	NIC	I	5306043	5306314	271
1	NIC	I	5311132	5311240	108
7	NIC	I	5311668	5312345	677
3	NIC	I	531885	531947	62
1	NIC	I	5322722	5322779	57
1	NIC	I	5323648	5323729	81
1	NIC	I	5329248	5329296	48
7	NIC	I	5330472	5330522	50
1	NIC	I	5353321	5353556	235
2	NIC	I	5359146	5359557	411
1	NIC	I	5361086	5361216	130
2	NIC	I	5361278	5361359	81
1	NIC	I	5361421	5361502	81
2	NIC	I	5363804	5363854	50
1	NIC	I	5367496	5367820	324
1	NIC	I	5370143	5370183	40
1	NIC	I	5375256	5375301	45
2	NIC	I	5378618	5378659	41
1	NIC	I	5384083	5384163	80
1	NIC	I	538628	538667	39
1	NIC	I	539963	540009	46
1	NIC	I	5414086	5414137	51
1	NIC	I	5419406	5419478	72
1	NIC	I	5419424	5419478	54
3	NIC	I	5419430	5419478	48
2	NIC	I	5427062	5427430	368
4	NIC	I	5437871	5437921	50
1	NIC	I	5438035	5438123	88
1	NIC	I	5445123	5445338	215
1	NIC	I	5445127	5445327	200
1	NIC	I	5454519	5454611	92
1	NIC	I	5463933	5464068	135
1	NIC	I	5470525	5470601	76
1	NIC	I	5476824	5476886	62
2	NIC	I	5476988	5477034	46
1	NIC	I	5478562	5478660	98
1	NIC	I	5496390	5496455	65
1	NIC	I	5517866	5518015	149
1	NIC	I	5549852	5549955	103
1	NIC	I	563744	563831	87
1	NIC	I	564464	564563	99
4	NIC	I	570199	570254	55
1	NIC	I	570406	570884	478
1	NIC	I	570467	570548	81
1	NIC	I	581965	582023	58
1	NIC	I	582394	582450	56
3	NIC	I	588030	588122	92
18	NIC	I	588059	588122	63
5	NIC	I	588059	588127	68
1	NIC	I	591739	591782	43
1	NIC	I	609497	609697	200
1	NIC	I	634879	636233	1354
2	NIC	I	636314	636396	82
1	NIC	I	637344	637397	53
1	NIC	I	641184	641447	263
1	NIC	I	644886	644928	42
1	NIC	I	653648	653708	60
1	NIC	I	663863	663915	52
1	NIC	I	679289	679339	50
2	NIC	I	683109	683175	66
1	NIC	I	691524	691579	55
1	NIC	I	692596	692639	43
55	NIC	I	698322	698404	82
1	NIC	I	702546	702621	75
1	NIC	I	703962	704014	52
1	NIC	I	705098	705194	96
1	NIC	I	705158	705208	50
2	NIC	I	706252	706294	42
2	NIC	I	706486	706570	84
1	NIC	I	706652	706696	44
1	NIC	I	712993	713054	61
1	NIC	I	714040	714189	149
127	NIC	I	714135	714189	54
10	NIC	I	717585	717863	278
1	NIC	I	719766	719809	43
1	NIC	I	721612	721669	57
1	NIC	I	722196	722287	91
1	NIC	I	722226	722287	61
2	NIC	I	730676	730725	49
1	NIC	I	730791	730864	73
1	NIC	I	732356	732409	53
1	NIC	I	746935	746979	44
1	NIC	I	756392	756470	78
2	NIC	I	776537	776588	51
1	NIC	I	776758	776820	62
1	NIC	I	777287	777342	55
3	NIC	I	777576	777890	314
2	NIC	I	777731	777777	46
1	NIC	I	777731	777795	64
9	NIC	I	777909	777960	51
4	NIC	I	785835	785895	60
1	NIC	I	787257	787885	628
1	NIC	I	796783	796829	46
1	NIC	I	801733	801780	47
1	NIC	I	81743	81784	41
1	NIC	I	821243	821376	133
2	NIC	I	827389	827431	42
6	NIC	I	827747	827902	155
1	NIC	I	827778	827827	49
5	NIC	I	844065	844143	78
1	NIC	I	870880	871040	160
1	NIC	I	885492	885529	37
1	NIC	I	887499	887544	45
2	NIC	I	894728	894779	51
2	NIC	I	895407	895822	415
1	NIC	I	897167	897241	74
1	NIC	I	903820	903891	71
1	NIC	I	904415	904564	149
3	NIC	I	905977	906287	310
3	NIC	I	907206	907253	47
2	NIC	I	91174	91271	97
3	NIC	I	912896	913549	653
2	NIC	I	91546	91603	57
1	NIC	I	920082	920257	175
1	NIC	I	920706	920761	55
2	NIC	I	92386	92444	58
4	NIC	I	925854	925948	94
4	NIC	I	925854	925961	107
226	NIC	I	925905	925961	56
1	NIC	I	926064	926121	57
1	NIC	I	926202	926247	45
159	NIC	I	926202	926251	49
64	NIC	I	926209	926251	42
1	NIC	I	935668	935728	60
1	NIC	I	935690	935746	56
1	NIC	I	935812	935942	130
1	NIC	I	941669	941721	52
2	NIC	I	941928	942214	286
2	NIC	I	941928	942245	317
9	NIC	I	942151	942214	63
4	NIC	I	942296	942346	50
2	NIC	I	942296	942400	104
1	NIC	I	942680	942804	124
1	NIC	I	950157	950221	64
2	NIC	I	950482	950525	43
1	NIC	I	952664	952751	87
16	NIC	I	95632	95798	166
1	NIC	I	95926	95967	41
28	NIC	I	95926	95978	52
3	NIC	I	95926	95991	65
23	NIC	I	96062	96272	210
1	NIC	I	969693	969742	49
1	NIC	I	977533	977579	46
2	NIC	I	977857	977914	57
14	NIC	I	978006	978058	52
2	NIC	I	978276	978332	56
1	NIC	I	979021	979069	48
1	NIC	I	980160	980211	51
1	NIC	I	980239	980433	194
1	NIC	I	980761	980845	84
1	NIC	I	980787	980845	58
1	NIC	I	980898	980948	50
2	NIC	I	988136	988343	207
6	NIC	I	99619	99687	68
1	NIC	II	1012565	1012619	54
1	NIC	II	1013103	1013571	468
1	NIC	II	1013289	1013571	282
1	NIC	II	1035238	1035280	42
2	NIC	II	1036316	1036459	143
1	NIC	II	1042992	1043047	55
1	NIC	II	1047676	1047942	266
3	NIC	II	1052010	1052061	51
1	NIC	II	1052122	1052172	50
1	NIC	II	1052368	1052410	42
47	NIC	II	1055713	1055753	40
1	NIC	II	1055857	1056054	197
1	NIC	II	1064228	1064275	47
10	NIC	II	1064566	1064621	55
1	NIC	II	1065880	1065931	51
1	NIC	II	1066303	1066396	93
1	NIC	II	1066357	1066396	39
2	NIC	II	1069688	1069739	51
1	NIC	II	1070053	1070206	153
1	NIC	II	1070735	1070801	66
1	NIC	II	1077966	1078482	516
1	NIC	II	1078799	1078890	91
1	NIC	II	108194	108256	62
2	NIC	II	1083500	1083547	47
1	NIC	II	1087011	1087088	77
32	NIC	II	1088318	1088429	111
1	NIC	II	1088574	1088641	67
1	NIC	II	1103692	1103773	81
1	NIC	II	1111430	1111520	90
1	NIC	II	1119982	1120077	95
3	NIC	II	1119995	1120105	110
1	NIC	II	1126278	1126402	124
1	NIC	II	1127412	1127541	129
2	NIC	II	1130573	1130670	97
1	NIC	II	1131078	1131147	69
1	NIC	II	1132123	1132283	160
1	NIC	II	1132245	1132283	38
1	NIC	II	1134975	1135039	64
2	NIC	II	1141126	1141179	53
1	NIC	II	1141126	1141280	154
1	NIC	II	1154792	1154859	67
3	NIC	II	1155023	1155141	118
1	NIC	II	1155128	1155384	256
1	NIC	II	1156882	1156983	101
1	NIC	II	1156882	1157074	192
82	NIC	II	1156882	1157082	200
22	NIC	II	1158054	1158117	63
9	NIC	II	1164297	1164357	60
2	NIC	II	1165470	1165514	44
4	NIC	II	1175884	1175936	52
1	NIC	II	1183802	1183861	59
1	NIC	II	1183802	1183914	112
1	NIC	II	1184256	1184368	112
1	NIC	II	1224897	1224952	55
1	NIC	II	1240229	1240350	121
1	NIC	II	1240479	1240553	74
1	NIC	II	1256048	1256127	79
1	NIC	II	1264004	1264046	42
1	NIC	II	127524	127578	54
4	NIC	II	127803	127842	39
9	NIC	II	128119	128198	79
1	NIC	II	1282555	1282752	197
25	NIC	II	1283323	1283525	202
1	NIC	II	1284855	1284920	65
1	NIC	II	1297545	1297740	195
2	NIC	II	1297884	1297922	38
7	NIC	II	1297884	1297927	43
2	NIC	II	1298151	1298200	49
10	NIC	II	1298245	1298387	142
1	NIC	II	1308052	1308094	42
1	NIC	II	1308190	1308417	227
136	NIC	II	1319128	1319188	60
26	NIC	II	1320819	1320889	70
5	NIC	II	1321000	1321065	65
2	NIC	II	1328999	1329087	88
1	NIC	II	1329555	1329623	68
1	NIC	II	1329984	1330041	57
8	NIC	II	1350867	1350918	51
3	NIC	II	1364092	1364142	50
2	NIC	II	136693	136748	55
1	NIC	II	1380215	1380309	94
2	NIC	II	1381039	1381079	40
3	NIC	II	1381141	1381499	358
1	NIC	II	1382725	1382776	51
1	NIC	II	1386238	1386275	37
1	NIC	II	1386238	1386295	57
2	NIC	II	1392286	1392770	484
1	NIC	II	1403590	1403829	239
1	NIC	II	1416296	1416344	48
2	NIC	II	141643	141708	65
1	NIC	II	1416544	1416586	42
3	NIC	II	1420950	1421001	51
1	NIC	II	1421215	1421272	57
1	NIC	II	1427890	1428096	206
12	NIC	II	1432230	1432275	45
1	NIC	II	1437002	1437067	65
3	NIC	II	1438881	1438945	64
2	NIC	II	1444453	1444499	46
1	NIC	II	1458888	1458949	61
3	NIC	II	1468887	1469074	187
1	NIC	II	147353	147402	49
27	NIC	II	147552	147607	55
4	NIC	II	147896	147941	45
1	NIC	II	147899	147941	42
13	NIC	II	1486038	1486108	70
1	NIC	II	1486065	1486108	43
1	NIC	II	1497019	1497388	369
1	NIC	II	1500376	1500685	309
7	NIC	II	1506462	1506762	300
1	NIC	II	1506710	1506762	52
1	NIC	II	1506714	1506762	48
1	NIC	II	1511608	1511655	47
1	NIC	II	151670	151737	67
1	NIC	II	1532594	1532632	38
8	NIC	II	1532594	1532658	64
1	NIC	II	1532669	1532738	69
1	NIC	II	1532680	1532755	75
1	NIC	II	1535430	1535606	176
2	NIC	II	1535464	1535526	62
1	NIC	II	1536938	1537266	328
1	NIC	II	1568725	1568767	42
1	NIC	II	157520	157571	51
6	NIC	II	1580244	1580284	40
1	NIC	II	162272	162355	83
3	NIC	II	1649727	1649814	87
1	NIC	II	1649775	1649814	39
82	NIC	II	1649878	1649919	41
139	NIC	II	1649878	1650147	269
1	NIC	II	1650157	1650203	46
24	NIC	II	1650568	1650624	56
1	NIC	II	1653993	1654053	60
2	NIC	II	1663140	1663187	47
1	NIC	II	1670137	1670189	52
13	NIC	II	1674554	1674597	43
1	NIC	II	1675098	1675156	58
3	NIC	II	1687520	1687571	51
1	NIC	II	1690289	1690336	47
5	NIC	II	1690343	1690487	144
1	NIC	II	1690424	1690487	63
3	NIC	II	1694456	1694504	48
3	NIC	II	1695808	1695871	63
1	NIC	II	1704327	1704386	59
1	NIC	II	1704544	1704617	73
4	NIC	II	1707431	1707748	317
1	NIC	II	1713311	1713410	99
1	NIC	II	1714252	1714312	60
1	NIC	II	1715442	1715483	41
281	NIC	II	1720700	1720752	52
1	NIC	II	1720821	1720870	49
1	NIC	II	172548	172593	45
1	NIC	II	1731700	1731763	63
1	NIC	II	1741421	1741480	59
1	NIC	II	174834	174873	39
1	NIC	II	1756892	1756930	38
3	NIC	II	1758217	1758301	84
1	NIC	II	1758707	1758762	55
32	NIC	II	1759860	1759900	40
1	NIC	II	1774194	1774370	176
1	NIC	II	1775327	1775391	64
107	NIC	II	178098	178139	41
1	NIC	II	1782829	1782893	64
1	NIC	II	1782933	1782987	54
1	NIC	II	1782933	1782995	62
1	NIC	II	1783180	1783257	77
1	NIC	II	1783221	1783257	36
2	NIC	II	1784121	1784241	120
1	NIC	II	1785748	1786140	392
4	NIC	II	1786414	1786471	57
1	NIC	II	1786418	1786477	59
1	NIC	II	178660	178699	39
1	NIC	II	1796534	1796577	43
1	NIC	II	180143	180299	156
4	NIC	II	180411	180460	49
1	NIC	II	1829078	1829126	48
1	NIC	II	1829498	1829589	91
1	NIC	II	1829807	1830023	216
1	NIC	II	1830175	1830236	61
6	NIC	II	1830615	1830665	50
1	NIC	II	1835177	1835320	143
3	NIC	II	1855795	1855852	57
89	NIC	II	1855795	1855902	107
1	NIC	II	1858253	1858466	213
1	NIC	II	1863214	1863268	54
1	NIC	II	1869320	1869370	50
1	NIC	II	187207	187377	170
1	NIC	II	187328	187374	46
2	NIC	II	187328	187377	49
2	NIC	II	1873345	1873470	125
10	NIC	II	1873397	1873470	73
21	NIC	II	1877521	1877655	134
7	NIC	II	1877601	1877655	54
3	NIC	II	1879222	1880115	893
17	NIC	II	1890895	1890949	54
1	NIC	II	1890895	1890952	57
1	NIC	II	1891155	1891210	55
1	NIC	II	1891756	1891790	34
1	NIC	II	1893472	1893514	42
1	NIC	II	189513	189611	98
1	NIC	II	189560	189611	51
3	NIC	II	1905777	1906383	606
5	NIC	II	1905952	1906383	431
14	NIC	II	1905987	1906125	138
21	NIC	II	1910218	1910316	98
2	NIC	II	1911877	1911944	67
1	NIC	II	191414	191495	81
4	NIC	II	1921645	1921687	42
17	NIC	II	1923906	1923957	51
1	NIC	II	1929625	1929710	85
1	NIC	II	193942	194038	96
1	NIC	II	194599	194665	66
7	NIC	II	1946916	1946964	48
2	NIC	II	1962066	1962114	48
2	NIC	II	1973095	1973170	75
3	NIC	II	1987154	1987549	395
7	NIC	II	1987534	1987600	66
2	NIC	II	1988204	1988256	52
5	NIC	II	2004065	2004117	52
1	NIC	II	2004065	2004193	128
1	NIC	II	2004473	2004607	134
3	NIC	II	201645	201689	44
1	NIC	II	2021459	2021529	70
2	NIC	II	2023929	2023972	43
2	NIC	II	2024015	2024058	43
1	NIC	II	2063519	2063564	45
1	NIC	II	2064158	2064206	48
14	NIC	II	2064626	2064672	46
3	NIC	II	2065644	2065710	66
2	NIC	II	2080388	2080440	52
1	NIC	II	2083299	2083363	64
2	NIC	II	2083316	2083594	278
1	NIC	II	2090137	2090543	406
2	NIC	II	2093038	2093125	87
5	NIC	II	209874	209921	47
4	NIC	II	2100193	2100242	49
3	NIC	II	2100285	2100519	234
1	NIC	II	2105656	2105800	144
1	NIC	II	211571	211619	48
1	NIC	II	2121031	2121093	62
2	NIC	II	2125014	2125079	65
3	NIC	II	2138181	2138320	139
1	NIC	II	2138387	2138601	214
4	NIC	II	2138531	2138589	58
1	NIC	II	2138531	2139103	572
1	NIC	II	2138553	2139081	528
1	NIC	II	2138872	2139103	231
1	NIC	II	2149118	2149531	413
1	NIC	II	2149464	2149531	67
1	NIC	II	2151729	2151808	79
1	NIC	II	215355	215417	62
1	NIC	II	215355	215425	70
2	NIC	II	215355	215450	95
1	NIC	II	2155965	2156128	163
2	NIC	II	2156495	2156635	140
1	NIC	II	215807	215963	156
2	NIC	II	2161746	2161957	211
1	NIC	II	2162402	2162485	83
1	NIC	II	2177591	2177760	169
1	NIC	II	2180092	2180191	99
1	NIC	II	218245	218335	90
1	NIC	II	2210056	2210110	54
9	NIC	II	2210056	2210224	168
1	NIC	II	2211005	2211107	102
1	NIC	II	2213691	2213744	53
7	NIC	II	2214042	2214094	52
1	NIC	II	2218254	2218336	82
1	NIC	II	2218935	2219093	158
5	NIC	II	2225031	2225073	42
4	NIC	II	2225031	2225082	51
9	NIC	II	2226216	2226296	80
1	NIC	II	2227826	2227884	58
2	NIC	II	2227826	2227889	63
2	NIC	II	2233710	2233780	70
1	NIC	II	2236740	2236791	51
1	NIC	II	2240464	2240507	43
1	NIC	II	2252942	2253008	66
1	NIC	II	2257292	2257484	192
1	NIC	II	2262357	2262427	70
1	NIC	II	2262357	2262871	514
1	NIC	II	2263315	2263367	52
1	NIC	II	226653	226722	69
5	NIC	II	2282451	2282506	55
3	NIC	II	2283508	2283563	55
1	NIC	II	2293775	2293828	53
3	NIC	II	2295233	2295361	128
1	NIC	II	2301150	2301228	78
1	NIC	II	230275	230445	170
1	NIC	II	2307686	2307873	187
1	NIC	II	2313251	2313290	39
5	NIC	II	2313251	2313295	44
1	NIC	II	2313358	2313408	50
31	NIC	II	2313698	2313984	286
1	NIC	II	2314550	2314622	72
1	NIC	II	2314550	2314627	77
1	NIC	II	2315521	2315579	58
1	NIC	II	2316028	2316068	40
1	NIC	II	2316199	2316634	435
1	NIC	II	2316239	2316394	155
1	NIC	II	2316239	2316611	372
1	NIC	II	2316540	2316611	71
1	NIC	II	2317136	2317227	91
1	NIC	II	232381	232791	410
1	NIC	II	2326280	2326323	43
2	NIC	II	2328598	2328668	70
28	NIC	II	2329533	2329588	55
7	NIC	II	2329853	2329895	42
1	NIC	II	233107	234850	1743
2	NIC	II	2331397	2331452	55
1	NIC	II	2331397	2331561	164
1	NIC	II	2332267	2332348	81
1	NIC	II	2334282	2334435	153
1	NIC	II	2341950	2341987	37
2	NIC	II	234853	239715	4862
2	NIC	II	2349028	2349082	54
1	NIC	II	2357960	2358012	52
1	NIC	II	2372985	2373040	55
37	NIC	II	2376256	2376302	46
1	NIC	II	2376442	2376487	45
1	NIC	II	2377126	2377175	49
1	NIC	II	2379511	2379580	69
2	NIC	II	2381908	2382092	184
17	NIC	II	2382216	2382255	39
1	NIC	II	2382474	2382548	74
1	NIC	II	2382775	2383027	252
2	NIC	II	2387207	2387408	201
1	NIC	II	2395218	2395275	57
1	NIC	II	240215	240266	51
5	NIC	II	2402237	2402276	39
1	NIC	II	2405161	2405198	37
1	NIC	II	2411997	2413250	1253
1	NIC	II	2418799	2418872	73
2	NIC	II	2419366	2419532	166
2	NIC	II	2431699	2431765	66
1	NIC	II	2431905	2431948	43
1	NIC	II	2432227	2432285	58
2	NIC	II	244547	244762	215
1	NIC	II	245573	245665	92
1	NIC	II	245912	246427	515
1	NIC	II	2466216	2466255	39
1	NIC	II	2466400	2466457	57
1	NIC	II	2466864	2467733	869
1	NIC	II	2466881	2466997	116
2	NIC	II	2488993	2489398	405
1	NIC	II	2494473	2494545	72
1	NIC	II	2495718	2495780	62
3	NIC	II	2496524	2496693	169
1	NIC	II	2503108	2503227	119
1	NIC	II	2503489	2503599	110
2	NIC	II	2512244	2512333	89
1	NIC	II	253231	253351	120
11	NIC	II	2543425	2543495	70
1	NIC	II	2543442	2543495	53
1	NIC	II	2545876	2545930	54
1	NIC	II	2545876	2547545	1669
2	NIC	II	2554954	2555006	52
1	NIC	II	2554954	2555053	99
6	NIC	II	2555269	2555320	51
1	NIC	II	2555269	2555366	97
1	NIC	II	2555269	2555553	284
1	NIC	II	2555932	2556140	208
2	NIC	II	2556495	2556689	194
1	NIC	II	2556676	2556751	75
1	NIC	II	2565268	2565447	179
6	NIC	II	2573870	2573997	127
1	NIC	II	2574436	2574514	78
1	NIC	II	2590931	2590980	49
1	NIC	II	2591579	2591622	43
2	NIC	II	2591675	2591726	51
1	NIC	II	2591675	2591757	82
3	NIC	II	2601325	2601380	55
1	NIC	II	2601409	2601481	72
1	NIC	II	2601416	2601481	65
13	NIC	II	2606418	2606470	52
1	NIC	II	2608105	2608154	49
7	NIC	II	2608105	2608231	126
2	NIC	II	2618064	2618138	74
4	NIC	II	2618899	2619003	104
1	NIC	II	2618935	2618988	53
1	NIC	II	2618935	2619003	68
1	NIC	II	2619052	2619167	115
6	NIC	II	2619232	2619275	43
1	NIC	II	2627341	2627397	56
1	NIC	II	2639837	2639913	76
1	NIC	II	2650333	2650384	51
1	NIC	II	2650424	2650473	49
1	NIC	II	2650633	2650699	66
1	NIC	II	2650726	2650783	57
2	NIC	II	265095	265260	165
5	NIC	II	2651237	2651436	199
2	NIC	II	2661312	2661365	53
1	NIC	II	2663941	2664074	133
70	NIC	II	2664236	2664341	105
2	NIC	II	2664236	2664390	154
1	NIC	II	2664341	2664475	134
5	NIC	II	2664348	2664475	127
1	NIC	II	2664422	2664475	53
5	NIC	II	2672507	2672639	132
2	NIC	II	2672507	2672696	189
1	NIC	II	2676766	2677083	317
1	NIC	II	267859	267906	47
1	NIC	II	2679172	2679217	45
1	NIC	II	2684958	2685012	54
1	NIC	II	2685241	2685312	71
4	NIC	II	2685870	2686005	135
1	NIC	II	2687736	2687892	156
5	NIC	II	2690902	2691196	294
28	NIC	II	2690928	2691034	106
1	NIC	II	2700167	2700215	48
2	NIC	II	2701486	2701530	44
10	NIC	II	2707565	2707602	37
1	NIC	II	2719833	2719893	60
1	NIC	II	2720238	2720339	101
1	NIC	II	2720320	2720394	74
1	NIC	II	2728268	2728311	43
20	NIC	II	2728958	2729015	57
1	NIC	II	2745934	2746202	268
1	NIC	II	2748188	2748248	60
3	NIC	II	2764928	2764968	40
1	NIC	II	2767307	2767356	49
2	NIC	II	2767397	2767497	100
1	NIC	II	2767520	2767599	79
1	NIC	II	2770654	2770721	67
1	NIC	II	2781318	2781407	89
2	NIC	II	2788429	2788476	47
1	NIC	II	2789804	2789864	60
1	NIC	II	2791796	2791841	45
2	NIC	II	2793972	2794012	40
1	NIC	II	2795160	2795201	41
1	NIC	II	2804723	2804779	56
1	NIC	II	2808122	2808281	159
2	NIC	II	2810076	2810133	57
4	NIC	II	2810090	2810133	43
1	NIC	II	2811155	2811241	86
5	NIC	II	2811256	2811429	173
3	NIC	II	2811283	2811429	146
1	NIC	II	281415	281529	114
1	NIC	II	2827054	2827118	64
1	NIC	II	2862681	2862810	129
2	NIC	II	2869538	2870151	613
1	NIC	II	2883823	2883994	171
1	NIC	II	2884159	2884241	82
2	NIC	II	2886959	2887035	76
1	NIC	II	289341	289419	78
1	NIC	II	2895823	2896000	177
326	NIC	II	2896459	2896534	75
1	NIC	II	2902969	2903025	56
1	NIC	II	2909289	2909366	77
1	NIC	II	2912054	2912105	51
1	NIC	II	2921312	2921447	135
7	NIC	II	2921312	2921451	139
3	NIC	II	2921400	2921440	40
1	NIC	II	2921978	2922312	334
1	NIC	II	2924311	2924358	47
3	NIC	II	2924311	2924372	61
1	NIC	II	2928294	2928536	242
3	NIC	II	2933002	2933058	56
60	NIC	II	2933121	2933167	46
86	NIC	II	294175	294272	97
1	NIC	II	294507	294570	63
3	NIC	II	2948171	2948551	380
1	NIC	II	294823	295053	230
1	NIC	II	2949209	2949266	57
1	NIC	II	2950693	2950771	78
6	NIC	II	2951196	2951260	64
2	NIC	II	2959927	2960022	95
3	NIC	II	2960104	2960145	41
1	NIC	II	2960104	2960152	48
3	NIC	II	2960694	2960758	64
1	NIC	II	2960702	2960745	43
6	NIC	II	2962199	2962250	51
1	NIC	II	2962217	2962264	47
1	NIC	II	2963060	2963109	49
1	NIC	II	2963060	2963117	57
1	NIC	II	2963060	2963481	421
1	NIC	II	2963113	2963326	213
1	NIC	II	2964144	2964196	52
1	NIC	II	2965020	2965083	63
1	NIC	II	2965935	2966097	162
1	NIC	II	2966158	2966202	44
1	NIC	II	2974959	2975565	606
3	NIC	II	297619	297671	52
3	NIC	II	2976485	2976522	37
1	NIC	II	2978767	2978818	51
1	NIC	II	2978767	2978842	75
7	NIC	II	2979120	2979171	51
6	NIC	II	2979124	2979266	142
12	NIC	II	2980439	2980478	39
1	NIC	II	2982568	2982651	83
14	NIC	II	2984622	2984680	58
2	NIC	II	2986707	2986768	61
1	NIC	II	2987032	2987108	76
1	NIC	II	2988911	2988966	55
1	NIC	II	298946	298992	46
4	NIC	II	2995495	2995533	38
1	NIC	II	2995497	2995618	121
1	NIC	II	2995923	2996149	226
29	NIC	II	2996547	2996584	37
1	NIC	II	3004555	3004624	69
1	NIC	II	3004685	3004782	97
1	NIC	II	3009171	3009243	72
2	NIC	II	3009758	3009820	62
1	NIC	II	3030972	3031054	82
2	NIC	II	3031151	3031212	61
1	NIC	II	3032031	3032086	55
1	NIC	II	3032057	3032202	145
2	NIC	II	3032147	3032202	55
1	NIC	II	3032161	3032202	41
229	NIC	II	3032465	3032511	46
1	NIC	II	3032822	3032864	42
31	NIC	II	3035361	3035399	38
1	NIC	II	304943	305009	66
1	NIC	II	3050946	3050987	41
2	NIC	II	3051051	3051114	63
2	NIC	II	3056270	3056325	55
1	NIC	II	3056475	3056554	79
3	NIC	II	3056651	3056694	43
1	NIC	II	3058474	3058529	55
1	NIC	II	3060957	3061278	321
3	NIC	II	3067901	3067999	98
1	NIC	II	3067904	3067999	95
1	NIC	II	3068748	3068787	39
1	NIC	II	3072868	3072908	40
1	NIC	II	3073152	3073296	144
1	NIC	II	3073152	3073384	232
1	NIC	II	3073336	3073384	48
1	NIC	II	3073451	3073497	46
1	NIC	II	3074771	3074882	111
1	NIC	II	3085170	3085213	43
1	NIC	II	3089494	3089603	109
1	NIC	II	3089675	3089744	69
6	NIC	II	3091269	3091360	91
1	NIC	II	3101953	3102167	214
1	NIC	II	3104690	3104736	46
1	NIC	II	3106571	3106638	67
10	NIC	II	3110462	3110562	100
1	NIC	II	3111780	3111846	66
1	NIC	II	3111785	3111846	61
11	NIC	II	3112923	3112963	40
1	NIC	II	3113168	3113991	823
1	NIC	II	3115394	3116182	788
2	NIC	II	3116097	3116182	85
1	NIC	II	3117283	3117337	54
3	NIC	II	3117724	3117769	45
2	NIC	II	3117724	3117902	178
1	NIC	II	3117850	3117950	100
1	NIC	II	3117902	3117950	48
1	NIC	II	3120931	3121010	79
1	NIC	II	3127409	3127516	107
1	NIC	II	3127453	3127496	43
2	NIC	II	3127453	3127511	58
5	NIC	II	312912	312953	41
4	NIC	II	3137623	3137669	46
1	NIC	II	3138065	3138106	41
8	NIC	II	3138106	3138182	76
2	NIC	II	3146430	3146476	46
1	NIC	II	3147210	3147255	45
6	NIC	II	3148187	3148236	49
2	NIC	II	3154037	3154098	61
2	NIC	II	3155811	3155867	56
1	NIC	II	3166333	3166439	106
7	NIC	II	3166534	3166646	112
23	NIC	II	3166605	3166653	48
1	NIC	II	3172002	3172061	59
3	NIC	II	3172715	3172768	53
1	NIC	II	3172715	3173033	318
1	NIC	II	317587	317652	65
1	NIC	II	3177294	3177354	60
1	NIC	II	3205305	3205476	171
1	NIC	II	3205832	3205878	46
1	NIC	II	3206111	3206157	46
2	NIC	II	3206551	3206716	165
1	NIC	II	3209561	3209672	111
1	NIC	II	3209588	3209648	60
1	NIC	II	320972	321026	54
1	NIC	II	3209852	3209904	52
8	NIC	II	3213305	3213348	43
1	NIC	II	3216389	3216443	54
1	NIC	II	3218424	3218521	97
1	NIC	II	3218957	3219007	50
6	NIC	II	3219165	3219217	52
8	NIC	II	3222591	3222653	62
[truncated: 1,066 more rows]

## Sheet: Novel noncanonical
Read count	Type	Chromosome	Coordinate_L	Coordinate_R	length (bp)	Splice site
28	NINC	I	1003216	1003309	93	GTTG
1	NINC	I	102181	102898	717	AGAG
1	NINC	I	102801	103079	278	CAAT
1	NINC	I	1032716	1032766	50	GTGT
1	NINC	I	1037086	1037617	531	CAGG
1	NINC	I	1043792	1044004	212	CTTC
13	NINC	I	1043793	1044003	210	TAAT
1	NINC	I	1051708	1052167	459	ATAG
1	NINC	I	1070536	1071490	954	CTAC
1	NINC	I	1082690	1083258	568	ATAA
1	NINC	I	1083141	1083193	52	GTGA
24	NINC	I	1108846	1109055	209	GTGG
1	NINC	I	111849	111909	60	GTTG
2	NINC	I	1135775	1135931	156	GTGA
1	NINC	I	1135781	1135931	150	GTAT
1	NINC	I	1145696	1145759	63	GTTG
1	NINC	I	1149853	1149938	85	CGTT
1	NINC	I	1159255	1159616	361	TTAG
1	NINC	I	1170244	1170690	446	ATAC
1	NINC	I	1171930	1172049	119	GAAG
1	NINC	I	1177683	1178483	800	ATGC
1	NINC	I	1183338	1184275	937	TTAC
1	NINC	I	1190689	1190739	50	GCAG
1	NINC	I	1192501	1193082	581	GTTG
1	NINC	I	1199657	1199814	157	GTGA
1	NINC	I	1213120	1213175	55	TCAT
1	NINC	I	1239800	1239934	134	TGAG
3	NINC	I	1240419	1240744	325	AGAA
1	NINC	I	1240420	1240745	325	GACA
4	NINC	I	1244045	1244148	103	CCAG
1	NINC	I	1255570	1255802	232	AAAA
1	NINC	I	1257617	1257741	124	TTAA
1	NINC	I	1261118	1261175	57	CTAC
1	NINC	I	1261653	1261755	102	CTAC
1	NINC	I	1261927	1262009	82	CTAC
1	NINC	I	1262602	1262666	64	CTAC
1	NINC	I	1308494	1308923	429	CGGC
1	NINC	I	1312579	1312678	99	TCAT
1	NINC	I	1359294	1359403	109	AAAG
1	NINC	I	1368322	1368388	66	GTGA
5	NINC	I	1368441	1368644	203	GTTA
1	NINC	I	1368441	1368646	205	GTGT
3	NINC	I	1380314	1380602	288	ATAA
1	NINC	I	1381325	1381406	81	GTGG
2	NINC	I	1381327	1381406	79	GTTA
1	NINC	I	1382705	1382861	156	ATAC
1	NINC	I	1430817	1431690	873	TAAT
1	NINC	I	1434133	1434215	82	CATG
1	NINC	I	1445471	1445599	128	CTAA
1	NINC	I	1450266	1450474	208	CTGG
1	NINC	I	1456085	1456151	66	TTAG
1	NINC	I	1504350	1504400	50	TGAG
1	NINC	I	152008	152210	202	GTAC
1	NINC	I	1542831	1543379	548	AAAT
10	NINC	I	1557842	1557897	55	GTGA
1	NINC	I	1558014	1558112	98	GAAG
1	NINC	I	1558015	1558069	54	GTTA
1	NINC	I	156472	156628	156	ATAT
1	NINC	I	1569896	1570358	462	CTAT
1	NINC	I	1597417	1597508	91	CTGC
3	NINC	I	1613854	1613923	69	GTGT
1	NINC	I	1624157	1624336	179	AAAC
1	NINC	I	1654830	1654911	81	ATAA
1	NINC	I	1676791	1677518	727	GTCG
1	NINC	I	1695276	1695360	84	AGTT
1	NINC	I	1695277	1695363	86	GAAA
1	NINC	I	1696689	1696818	129	GTAT
1	NINC	I	1697012	1697166	154	GAAG
1	NINC	I	1701293	1701361	68	GTTA
2	NINC	I	1744710	1745462	752	TTTG
1	NINC	I	1744857	1745594	737	TCTG
1	NINC	I	1756528	1756597	69	ACAC
1	NINC	I	1758639	1759217	578	AAAG
1	NINC	I	1758936	1759101	165	CAAA
1	NINC	I	1759857	1762340	2483	AAGT
2	NINC	I	1764560	1765367	807	GACC
1	NINC	I	1803858	1803952	94	ATTG
1	NINC	I	180720	180887	167	GGCC
1	NINC	I	1808740	1808799	59	GTGC
1	NINC	I	1808748	1808799	51	GTTG
1	NINC	I	1812762	1813722	960	ATAG
1	NINC	I	181436	181486	50	CTAG
1	NINC	I	1824592	1825816	1224	TAGG
1	NINC	I	1826808	1826964	156	GTGT
1	NINC	I	1831049	1831118	69	GTCG
1	NINC	I	1831052	1831121	69	CCTG
1	NINC	I	183357	184389	1032	TGAC
1	NINC	I	1885266	1885354	88	CTAC
1	NINC	I	188972	189243	271	GTTG
1	NINC	I	1890210	1890292	82	GTTG
1	NINC	I	189040	189096	56	CTAC
5	NINC	I	1890812	1891154	342	ATAT
1	NINC	I	1892625	1892911	286	CGAA
5	NINC	I	1897755	1898077	322	GAAG
1	NINC	I	1898037	1898193	156	ATTC
1	NINC	I	1899031	1899244	213	TGAT
1	NINC	I	190000	190063	63	TTTG
1	NINC	I	190001	190063	62	TTTG
2	NINC	I	190002	190063	61	TTTG
6	NINC	I	1947845	1948307	462	TTTA
1	NINC	I	1966038	1966101	63	GCAG
1	NINC	I	1966049	1966101	52	GGAG
1	NINC	I	1975873	1976076	203	TTTT
1	NINC	I	1977309	1977742	433	TTAA
1	NINC	I	1981594	1981818	224	GGAC
1	NINC	I	1995251	1995377	126	CTAG
1	NINC	I	1996273	1996324	51	GTTG
3	NINC	I	1997089	1997392	303	TTAG
1	NINC	I	2028573	2028634	61	ATAG
1	NINC	I	2029284	2029362	78	ATTG
1	NINC	I	2040952	2041132	180	AGAG
1	NINC	I	2064805	2064976	171	TCAT
1	NINC	I	2065179	2065784	605	TTGT
1	NINC	I	207297	207366	69	AGTG
6	NINC	I	207300	207369	69	CTTG
1	NINC	I	2079609	2079722	113	GTTA
1	NINC	I	208474	208552	78	GTTG
1	NINC	I	2094154	2094229	75	TTAG
3	NINC	I	2094519	2094569	50	GAAA
1	NINC	I	2096440	2096517	77	TTAG
1	NINC	I	2116018	2116192	174	GTTA
1	NINC	I	2134488	2134597	109	GTAT
1	NINC	I	2140573	2140689	116	GATG
4	NINC	I	2165893	2166016	123	CTAA
1	NINC	I	216849	216919	70	AGGG
3	NINC	I	2209834	2209896	62	ATGT
1	NINC	I	2234393	2234510	117	GTGG
1	NINC	I	2250976	2251026	50	GTGC
1	NINC	I	2256179	2256230	51	GAAA
1	NINC	I	2260006	2261699	1693	ATAA
1	NINC	I	2299601	2299655	54	CTAT
1	NINC	I	2300813	2301289	476	TTAT
1	NINC	I	230922	232688	1766	AAAT
1	NINC	I	2313434	2313528	94	GTTG
1	NINC	I	2314547	2314890	343	ACAT
1	NINC	I	2315599	2315695	96	GTTG
1	NINC	I	232665	233036	371	CTTG
1	NINC	I	2332384	2332436	52	GTGG
12	NINC	I	2332539	2332604	65	GTAT
1	NINC	I	2336497	2336621	124	ACAA
1	NINC	I	2340275	2340392	117	GTGG
1	NINC	I	2348091	2348210	119	TGGT
1	NINC	I	2348869	2349007	138	GTTG
1	NINC	I	235137	248614	13477	CTAC
1	NINC	I	2355496	2355748	252	CTGG
1	NINC	I	2356154	2356217	63	AGAG
2	NINC	I	2358364	2358496	132	AAAT
2	NINC	I	2358626	2358701	75	GAAC
2	NINC	I	2358686	2359083	397	TTAC
1	NINC	I	2359131	2359197	66	CATC
1	NINC	I	2377515	2377582	67	GTGC
1	NINC	I	2395653	2395704	51	CTCC
1	NINC	I	2396523	2396752	229	GTGT
3	NINC	I	241325	241377	52	CTAC
1	NINC	I	2425842	2426455	613	TAAT
1	NINC	I	2439638	2440102	464	TGCG
1	NINC	I	2446601	2447102	501	GTCA
1	NINC	I	2457539	2458781	1242	GTAT
1	NINC	I	2480949	2481258	309	AAAG
1	NINC	I	2499824	2499875	51	GTGT
12	NINC	I	2523840	2523924	84	CTCA
8	NINC	I	252644	253597	953	CCAT
1	NINC	I	252709	253596	887	CCGG
1	NINC	I	2528795	2529143	348	CTTG
1	NINC	I	2529212	2529267	55	CCAA
1	NINC	I	2532186	2532453	267	CAAC
1	NINC	I	2538562	2538659	97	TCAA
1	NINC	I	2538809	2539019	210	GTTG
1	NINC	I	2539318	2539467	149	GAAT
1	NINC	I	2539511	2539854	343	GAAG
1	NINC	I	2541952	2542346	394	GTCA
1	NINC	I	2545952	2546279	327	ATCT
1	NINC	I	255239	255290	51	GTAT
1	NINC	I	2575525	2575930	405	TTAG
1	NINC	I	2580558	2581127	569	ACAC
1	NINC	I	2581355	2581484	129	AGTG
1	NINC	I	2582723	2582798	75	CTCT
1	NINC	I	2584069	2584170	101	CTAG
1	NINC	I	2595749	2595821	72	TACA
1	NINC	I	2610451	2610529	78	AGAG
2	NINC	I	2620466	2620763	297	TGTA
1	NINC	I	2643791	2643859	68	GAAG
1	NINC	I	2644407	2644714	307	TTCC
1	NINC	I	2667217	2667269	52	GTGT
2	NINC	I	2674316	2674433	117	TTAG
1	NINC	I	2690271	2690406	135	GGTA
1	NINC	I	2690740	2690800	60	CATA
1	NINC	I	2690745	2690804	59	AAGG
1	NINC	I	2697375	2698093	718	GAAT
1	NINC	I	2701808	2701958	150	ATAG
1	NINC	I	2721354	2721404	50	AGAG
1	NINC	I	2722291	2722375	84	GTGC
2	NINC	I	2746930	2747118	188	GTGC
1	NINC	I	2754608	2755218	610	ATAG
1	NINC	I	2754615	2755214	599	TTTT
4	NINC	I	2754690	2755527	837	ATAC
1	NINC	I	2755657	2755789	132	GTGA
1	NINC	I	2755724	2755779	55	CAGG
1	NINC	I	2755732	2755784	52	GATT
8	NINC	I	2757978	2758206	228	CACA
1	NINC	I	2791215	2791339	124	AGAC
1	NINC	I	279156	279402	246	CTCC
1	NINC	I	2791837	2792472	635	CTAC
3	NINC	I	2807899	2810504	2605	ATTC
2	NINC	I	2810781	2811339	558	CTTT
3	NINC	I	2812069	2812220	151	ATCG
1	NINC	I	2815908	2825594	9686	ATTT
1	NINC	I	2818442	2825816	7374	GTTA
2	NINC	I	2824118	2825068	950	CTAC
1	NINC	I	2827100	2827995	895	CTTC
1	NINC	I	2833365	2833425	60	GAAG
1	NINC	I	2866975	2867379	404	AAAA
3	NINC	I	2891392	2891815	423	GAAT
1	NINC	I	2903868	2904200	332	CTTC
1	NINC	I	292707	293660	953	GTAA
1	NINC	I	2929527	2939956	10429	ATAC
1	NINC	I	2929586	2940015	10429	AGAC
1	NINC	I	2948429	2949002	573	CCAT
1	NINC	I	2977295	2977535	240	TTTT
1	NINC	I	2995257	2996482	1225	CTGC
1	NINC	I	3012660	3013196	536	GAGG
1	NINC	I	3013041	3013107	66	CGCC
1	NINC	I	3028477	3029045	568	CTTC
1	NINC	I	3028959	3030335	1376	TCAT
1	NINC	I	3044250	3044393	143	TAAC
1	NINC	I	3061312	3061374	62	GCAG
1	NINC	I	3073505	3075352	1847	ATCA
1	NINC	I	3074563	3074617	54	GCAG
1	NINC	I	3074576	3074851	275	ACAG
1	NINC	I	3074625	3075051	426	CCAG
1	NINC	I	309838	309888	50	GTGT
1	NINC	I	3109312	3109803	491	GTGA
1	NINC	I	3109552	3109605	53	GGAG
1	NINC	I	3111120	3111765	645	ATAC
1	NINC	I	311179	311298	119	GTGG
2	NINC	I	3115834	3116131	297	CTTT
1	NINC	I	3139166	3144698	5532	ATAA
1	NINC	I	3185457	3186229	772	CTGT
1	NINC	I	320093	320308	215	ATAC
1	NINC	I	3205647	3218474	12827	AGAG
1	NINC	I	3219823	3219918	95	CTGC
1	NINC	I	3220003	3220345	342	TTGG
4	NINC	I	3220998	3221222	224	ATAG
1	NINC	I	3233907	3233958	51	GTGA
6	NINC	I	3241576	3241661	85	GTTG
2	NINC	I	3255349	3257426	2077	TTGA
1	NINC	I	3260260	3260467	207	GGGA
1	NINC	I	3268510	3268574	64	AGTA
9	NINC	I	3278194	3278301	107	TCTC
1	NINC	I	3286667	3286735	68	GTAT
1	NINC	I	3299555	3299632	77	GTTG
2	NINC	I	3301189	3301257	68	AATG
1	NINC	I	3320690	3325184	4494	ATTA
1	NINC	I	3332819	3334117	1298	GTTC
1	NINC	I	3344892	3345030	138	GCAG
2	NINC	I	3347055	3347121	66	GTGG
2	NINC	I	3354758	3355244	486	CTTT
1	NINC	I	3356799	3356957	158	CTTT
1	NINC	I	3366871	3366931	60	GTGT
4	NINC	I	3367916	3368300	384	CTAA
1	NINC	I	3368663	3369287	624	CTTT
1	NINC	I	3368928	3369233	305	CGAG
1	NINC	I	3370382	3370652	270	GTTG
1	NINC	I	3377366	3377510	144	GTGG
1	NINC	I	3382404	3382479	75	GTGG
3	NINC	I	3384873	3385442	569	CCCT
1	NINC	I	3385116	3385229	113	ATAG
1	NINC	I	3396424	3397585	1161	TTAG
1	NINC	I	3397463	3397642	179	GGAG
3	NINC	I	3397466	3397646	180	AAGG
6	NINC	I	3397974	3398061	87	CTAC
2	NINC	I	3398017	3398361	344	ATTG
1	NINC	I	3398111	3398205	94	CTAC
1	NINC	I	3399560	3399674	114	CTGT
1	NINC	I	3405013	3415512	10499	TGTA
1	NINC	I	3413510	3413570	60	GTTG
1	NINC	I	3430300	3430738	438	CTGG
2	NINC	I	3441360	3441484	124	GGTT
1	NINC	I	3441760	3441930	170	AAAG
1	NINC	I	3460561	3460643	82	TGAA
3	NINC	I	3479823	3480011	188	TTCT
1	NINC	I	3479828	3480015	187	CGAT
25	NINC	I	3480722	3480791	69	TCAG
1	NINC	I	3483841	3484152	311	ATAA
1	NINC	I	3485065	3485241	176	GTGG
2	NINC	I	3527335	3527634	299	GTAT
1	NINC	I	3532822	3532978	156	ACAG
1	NINC	I	3537787	3537982	195	GGTT
1	NINC	I	3569231	3569291	60	GTTG
1	NINC	I	3569367	3569442	75	GTGA
1	NINC	I	3583994	3584712	718	GTGA
1	NINC	I	3585784	3585918	134	GTAT
1	NINC	I	3594166	3594291	125	TAAA
1	NINC	I	3623960	3624459	499	GATT
1	NINC	I	3634676	3659733	25057	AGTT
1	NINC	I	3637239	3637357	118	AGGG
1	NINC	I	3647064	3647298	234	CAGG
14	NINC	I	3647322	3647643	321	CTTG
1	NINC	I	3660556	3660607	51	GTGT
2	NINC	I	367039	367103	64	GGTA
1	NINC	I	367187	367290	103	AGAA
1	NINC	I	3687049	3687125	76	GTTG
2	NINC	I	3711671	3711721	50	GTGG
1	NINC	I	3713319	3713371	52	GTCG
3	NINC	I	3714300	3714350	50	GGAA
1	NINC	I	3721505	3721578	73	CTAC
1	NINC	I	3722809	3722997	188	TATA
1	NINC	I	3746750	3746859	109	TTGG
1	NINC	I	3800482	3800534	52	GTAA
1	NINC	I	3804579	3804660	81	GCAG
1	NINC	I	3819346	3819459	113	GTGG
1	NINC	I	3821032	3821187	155	GTGG
1	NINC	I	3824789	3824997	208	GATC
1	NINC	I	3826831	3827258	427	AACG
1	NINC	I	385060	385120	60	GTCG
1	NINC	I	3854744	3854799	55	GTGA
1	NINC	I	3868973	3880724	11751	CTAC
1	NINC	I	3888854	3889295	441	GAAG
1	NINC	I	3896862	3896936	74	GTGG
1	NINC	I	3897052	3897102	50	GGTA
1	NINC	I	3918268	3918567	299	CTCA
1	NINC	I	3921100	3921255	155	TTAC
1	NINC	I	3937861	3939121	1260	TTCG
1	NINC	I	3964239	3965817	1578	ATGG
1	NINC	I	3975247	3975790	543	GCAC
2	NINC	I	3975726	3975880	154	AGTA
1	NINC	I	3975832	3975882	50	GTGC
1	NINC	I	3981527	3981590	63	GTGG
1	NINC	I	3987482	3987650	168	TAAC
1	NINC	I	3990885	3992192	1307	TTTG
1	NINC	I	3993490	3995388	1898	TTGT
1	NINC	I	4006245	4007034	789	TTCT
1	NINC	I	4037067	4037480	413	GCCC
3	NINC	I	4046969	4047072	103	GTGA
1	NINC	I	4049214	4055024	5810	TTAT
1	NINC	I	405083	405137	54	GTTG
4	NINC	I	4051950	4052021	71	GTTG
1	NINC	I	4060765	4060935	170	TAAG
1	NINC	I	406168	406268	100	GTGT
1	NINC	I	4062245	4062852	607	AGGG
1	NINC	I	4062471	4062765	294	CTCA
1	NINC	I	4063169	4063957	788	CAAT
1	NINC	I	4063692	4063770	78	CTTC
1	NINC	I	4063692	4063809	117	CTTC
1	NINC	I	4079322	4079394	72	TAGG
1	NINC	I	4120512	4120578	66	GTGG
1	NINC	I	4137738	4306006	168268	CTAC
1	NINC	I	4137894	4138489	595	CTGG
1	NINC	I	415678	416607	929	GAAC
1	NINC	I	4178623	4178817	194	GTAT
1	NINC	I	4206949	4207049	100	AAAG
1	NINC	I	4207718	4208057	339	GTAT
1	NINC	I	4233456	4233566	110	ATTC
1	NINC	I	4233880	4234679	799	ACGC
1	NINC	I	4233936	4234458	522	CGAT
4	NINC	I	4234012	4234462	450	TCAG
1	NINC	I	4249797	4250055	258	AAAG
1	NINC	I	4251022	4251214	192	AGAC
1	NINC	I	4251075	4251141	66	CTCG
1	NINC	I	4251129	4251207	78	ATCG
1	NINC	I	4281964	4282029	65	TTTC
1	NINC	I	4293392	4293493	101	ATTG
1	NINC	I	4304998	4305249	251	GGTT
1	NINC	I	4311464	4312454	990	CTAC
1	NINC	I	4311467	4312463	996	CTTC
1	NINC	I	4343984	4355551	11567	TAAA
2	NINC	I	435197	453371	18174	TTAT
3	NINC	I	437019	437483	464	CAAC
1	NINC	I	4374257	4374376	119	GTGT
1	NINC	I	4395480	4395532	52	GAGC
1	NINC	I	4415536	4415960	424	ATTG
2	NINC	I	4415843	4415912	69	GCAG
1	NINC	I	4425691	4425766	75	TTCG
1	NINC	I	4425969	4426488	519	AGAG
1	NINC	I	4438648	4438703	55	GTGT
1	NINC	I	4472696	4472785	89	AGAG
1	NINC	I	4473098	4473181	83	TCTG
1	NINC	I	4473271	4473323	52	GTTA
1	NINC	I	4473271	4473325	54	GTGG
1	NINC	I	4473273	4473327	54	AATG
1	NINC	I	4473570	4474053	483	CATG
1	NINC	I	4479492	4479572	80	TGAG
1	NINC	I	4481363	4481514	151	TCCG
1	NINC	I	4490914	4490969	55	GTTG
1	NINC	I	449238	449292	54	AAGC
1	NINC	I	449240	449292	52	GGGC
1	NINC	I	4501223	4501609	386	TTAT
1	NINC	I	4516747	4516797	50	TGAG
1	NINC	I	4526608	4529644	3036	AACC
1	NINC	I	4534124	4534294	170	GCAA
1	NINC	I	457590	458276	686	CTAC
2	NINC	I	4582682	4583280	598	GTGC
1	NINC	I	4583557	4583619	62	GTGA
4	NINC	I	4612259	4612384	125	TTGG
1	NINC	I	4614083	4614202	119	AAAG
2	NINC	I	4614083	4614437	354	AAAG
1	NINC	I	4649201	4649267	66	CTAC
2	NINC	I	4649300	4649936	636	ACTG
1	NINC	I	4656639	4656701	62	GTGG
1	NINC	I	4656968	4657660	692	CTTT
1	NINC	I	4667845	4667905	60	GCAG
1	NINC	I	4675824	4675919	95	CTTT
8	NINC	I	4677541	4686549	9008	TTAA
1	NINC	I	4723046	4723187	141	AGGT
1	NINC	I	4723508	4723607	99	GTCG
1	NINC	I	4723692	4724227	535	CAAG
1	NINC	I	4724145	4724392	247	CCCG
1	NINC	I	472801	472857	56	GTGC
1	NINC	I	4732174	4732301	127	CTAG
1	NINC	I	4744765	4744909	144	TAAA
1	NINC	I	4752219	4752287	68	GGCC
1	NINC	I	4752223	4752291	68	GTGG
1	NINC	I	4763310	4763439	129	GATC
1	NINC	I	4763995	4764038	43	CTAC
1	NINC	I	4781868	4782054	186	GTAA
1	NINC	I	4783099	4783149	50	AAGC
2	NINC	I	4789642	4789744	102	CTGC
1	NINC	I	4789738	4789894	156	TCCT
1	NINC	I	4789930	4789981	51	ATGG
1	NINC	I	4789937	4790074	137	CTCC
1	NINC	I	4789943	4790024	81	GATC
1	NINC	I	4790665	4790728	63	GTAA
1	NINC	I	4825628	4825923	295	CCTA
1	NINC	I	4825759	4825917	158	GTTG
1	NINC	I	4826974	4827208	234	CTAT
1	NINC	I	4835405	4835617	212	TTAA
1	NINC	I	4839806	4840103	297	GAAA
1	NINC	I	484200	484811	611	TTAT
1	NINC	I	4850690	4850828	138	CTAG
1	NINC	I	4850729	4850911	182	CCAA
1	NINC	I	4857690	4857892	202	CTAG
1	NINC	I	4864917	4865273	356	ATGG
1	NINC	I	4874702	4874820	118	GTTG
1	NINC	I	490931	491020	89	GTCG
1	NINC	I	4935340	4935697	357	TTTC
1	NINC	I	4936054	4936119	65	CTGC
1	NINC	I	4959296	4959550	254	CTTC
1	NINC	I	4980485	4980561	76	GTGA
1	NINC	I	4989776	4990713	937	ATAG
1	NINC	I	4991539	4992042	503	AAGC
1	NINC	I	5016026	5016076	50	TGAG
1	NINC	I	5025869	5025941	72	AAAG
1	NINC	I	5043764	5043827	63	AACG
4	NINC	I	5043851	5044048	197	AAAA
1	NINC	I	5043851	5044067	216	GAAA
1	NINC	I	5051495	5067525	16030	CTAC
1	NINC	I	5061226	5061374	148	CCAC
1	NINC	I	5068458	5068647	189	GTTG
1	NINC	I	5079081	5079881	800	AGGG
1	NINC	I	508334	508694	360	TCGG
4	NINC	I	5084071	5084128	57	GAAG
1	NINC	I	5085663	5086346	683	TTCG
1	NINC	I	5086737	5086945	208	TTTT
1	NINC	I	509484	509562	78	GTGC
1	NINC	I	5098721	5098774	53	GTTG
1	NINC	I	5111548	5111613	65	GTAT
2	NINC	I	5119830	5119887	57	GTGA
1	NINC	I	5126594	5127968	1374	CAAA
1	NINC	I	5141497	5141758	261	GAAA
1	NINC	I	5141547	5141743	196	AAGA
1	NINC	I	5171559	5171619	60	GCTC
1	NINC	I	5171907	5172032	125	TGTG
3	NINC	I	5171913	5172038	125	TTGG
3	NINC	I	5174193	5174484	291	GCAG
1	NINC	I	5174196	5174331	135	GACC
1	NINC	I	5174471	5174561	90	GTTG
1	NINC	I	5174527	5177760	3233	TTAC
1	NINC	I	5175416	5175499	83	TTAC
1	NINC	I	5180538	5181053	515	GACC
1	NINC	I	5188101	5188377	276	ATAT
1	NINC	I	5206863	5207726	863	TGAG
1	NINC	I	5222991	5225127	2136	TTTG
1	NINC	I	5231350	5231605	255	AAAG
1	NINC	I	523625	524575	950	CTGC
1	NINC	I	5264816	5264882	66	GTGA
1	NINC	I	526691	526853	162	GGTA
1	NINC	I	52822	53228	406	GTTT
1	NINC	I	5287555	5287613	58	GTGA
1	NINC	I	5292864	5292977	113	GAGC
1	NINC	I	5302520	5302573	53	CTCC
1	NINC	I	5306264	5306314	50	GGAG
5	NINC	I	5327829	5327880	51	GCAG
1	NINC	I	5329646	5329713	67	GTGT
5	NINC	I	5332503	5332557	54	TTTG
36	NINC	I	5334259	5334327	68	AGAG
2	NINC	I	5359194	5359551	357	GTGA
2	NINC	I	5365963	5366339	376	GTGA
1	NINC	I	5370464	5370552	88	TAGA
1	NINC	I	5384082	5384206	124	GTGG
1	NINC	I	5389085	5389149	64	TTAT
132	NINC	I	5407756	5407886	130	CAGT
1	NINC	I	5507004	5507080	76	AAAA
1	NINC	I	55414	56039	625	GGCG
1	NINC	I	586834	587112	278	CCTC
4	NINC	I	599482	600367	885	TTTA
1	NINC	I	610079	610143	64	GATG
1	NINC	I	636529	637173	644	GAAT
2	NINC	I	645444	646391	947	AATT
1	NINC	I	645663	646317	654	CTAA
1	NINC	I	660893	661397	504	GCAG
1	NINC	I	667919	668150	231	GAAG
1	NINC	I	669095	669177	82	GTAT
1	NINC	I	680096	681137	1041	AGAA
1	NINC	I	713069	713603	534	GAGT
1	NINC	I	715721	715815	94	GTTG
1	NINC	I	720344	720505	161	CTAA
1	NINC	I	720344	720506	162	CTAA
1	NINC	I	725127	725250	123	CTGG
2	NINC	I	725133	725265	132	CAAT
1	NINC	I	756880	756988	108	GTGA
1	NINC	I	76537	76745	208	GAAG
1	NINC	I	777285	777335	50	AGAA
1	NINC	I	780415	780728	313	TTAT
1	NINC	I	785431	786033	602	AATG
1	NINC	I	816373	816433	60	GTGG
1	NINC	I	820242	820332	90	CTTT
1	NINC	I	820247	820338	91	AAGA
1	NINC	I	823784	823894	110	GTGA
1	NINC	I	824042	825377	1335	TCTT
1	NINC	I	833393	835260	1867	GAAT
1	NINC	I	842242	842323	81	CGTA
1	NINC	I	872109	872159	50	CTAA
1	NINC	I	877876	877976	100	ATTG
1	NINC	I	893398	893476	78	ACAC
1	NINC	I	895974	896039	65	GTGA
2	NINC	I	918526	919252	726	TCTC
1	NINC	I	926670	926735	65	GTGA
1	NINC	I	948427	948480	53	GTCG
1	NINC	I	95902	96259	357	ATTG
1	NINC	I	95990	96389	399	GCAG
1	NINC	I	95999	96555	556	ATAA
1	NINC	I	96057	96257	200	AGAA
1	NINC	I	96106	96253	147	CACC
2	NINC	I	961402	961632	230	GGAT
1	NINC	I	96310	96373	63	CGTG
15	NINC	I	96447	96587	140	GTCT
1	NINC	I	96461	96533	72	GTCT
1	NINC	I	96480	96534	54	CTTG
6	NINC	I	96485	96543	58	GCCG
1	NINC	I	96550	99473	2923	ATTG
40	NINC	I	96652	96949	297	GCAG
1	NINC	I	979021	979120	99	GTGA
1	NINC	I	980773	980845	72	GTGA
1	NINC	I	988481	989132	651	CTGC
1	NINC	I	988513	988759	246	GTTG
1	NINC	I	991561	994023	2462	TTTT
1	NINC	I	996928	997331	403	TAGG
1	NINC	II	1020146	1020614	468	CTAC
1	NINC	II	1021236	1021376	140	CTAC
4	NINC	II	1024672	1025386	714	CTTT
1	NINC	II	1030320	1030419	99	CTAG
1	NINC	II	1039316	1040220	904	TTAG
1	NINC	II	1042844	1042900	56	GTGG
2	NINC	II	1044874	1045103	229	TTAT
1	NINC	II	1044880	1045564	684	GCAT
3	NINC	II	1045149	1045377	228	GAAG
6	NINC	II	1045181	1045410	229	GGTG
1	NINC	II	1045249	1045478	229	TTAT
2	NINC	II	1045259	1045488	229	AAAA
2	NINC	II	1052044	1052463	419	TTCG
1	NINC	II	1059276	1077337	18061	TTAA
1	NINC	II	1059276	1077338	18062	TTAA
2	NINC	II	1062388	1062442	54	AAAG
1	NINC	II	1062634	1062709	75	GTGC
1	NINC	II	1069430	1077365	7935	TAAA
1	NINC	II	1069688	1069906	218	GGAG
1	NINC	II	1084524	1084612	88	CCAG
1	NINC	II	1086683	1086886	203	GTAT
1	NINC	II	1102782	1103125	343	ATAG
1	NINC	II	1104308	1104359	51	GGTT
1	NINC	II	1112987	1113039	52	GTAT
2	NINC	II	1121689	1121827	138	GAGA
2	NINC	II	1124447	1124516	69	TTAA
1	NINC	II	1129987	1130051	64	TAGA
1	NINC	II	1135410	1135506	96	CTAG
2	NINC	II	1169468	1169659	191	AATG
1	NINC	II	1182791	1182845	54	GTGG
1	NINC	II	1186641	1186737	96	GTTA
1	NINC	II	1200671	1200982	311	GAAG
1	NINC	II	1204369	1204450	81	AACC
1	NINC	II	1220012	1220563	551	AAAC
1	NINC	II	1238916	1239004	88	GTTA
1	NINC	II	1248669	1249002	333	ATAG
1	NINC	II	1262286	1262600	314	TTTT
1	NINC	II	1262543	1262958	415	TTTG
1	NINC	II	1262586	1262928	342	GTTA
1	NINC	II	1271230	1271287	57	CCAC
2	NINC	II	1287914	1288406	492	CTAC
1	NINC	II	1292253	1292418	165	ATAG
1	NINC	II	1307771	1307912	141	TGTC
1	NINC	II	1320819	1320897	78	GTGA
2	NINC	II	1321003	1321065	62	TGAG
1	NINC	II	1321004	1321054	50	GTTG
1	NINC	II	1329717	1329767	50	GTAT
2	NINC	II	1343438	1343489	51	GTTG
2	NINC	II	1348416	1348504	88	GTGG
1	NINC	II	1350914	1351114	200	ATAG
1	NINC	II	1375419	1375493	74	GTGA
1	NINC	II	1377159	1378118	959	TTTG
1	NINC	II	1379357	1391422	12065	ATGG
1	NINC	II	138331	139087	756	AACG
1	NINC	II	1386168	1386223	55	ATTA
2	NINC	II	1391625	1392986	1361	ATTT
1	NINC	II	1391908	1392125	217	ATAC
1	NINC	II	1392066	1392973	907	TCGG
2	NINC	II	1392307	1392744	437	GTTG
1	NINC	II	1402948	1403001	53	GAAG
1	NINC	II	1412107	1412203	96	TCAG
1	NINC	II	1416296	1416347	51	GTTG
1	NINC	II	1429591	1429989	398	AGAG
1	NINC	II	1445387	1445467	80	GTTG
3	NINC	II	1450793	1450886	93	GTGT
1	NINC	II	1460622	1460760	138	GTTA
2	NINC	II	146076	146356	280	CAAC
1	NINC	II	1461864	1462739	875	TTAT
1	NINC	II	1464366	1464668	302	TCTG
1	NINC	II	1469289	1469382	93	CAAT
1	NINC	II	1476298	1476703	405	ATAG
1	NINC	II	1496636	1497304	668	TTAG
1	NINC	II	1500593	1500708	115	AATG
1	NINC	II	1500877	1500968	91	CGTG
1	NINC	II	1516834	1516900	66	GTTA
1	NINC	II	152132	152240	108	GGAT
1	NINC	II	152381	152835	454	CAAC
1	NINC	II	1530772	1531029	257	CAAT
1	NINC	II	155336	155467	131	GTAT
2	NINC	II	1554375	1555890	1515	CTAT
1	NINC	II	1564101	1565289	1188	GCCA
1	NINC	II	1564105	1564368	263	GAAA
1	NINC	II	1564580	1564793	213	ATTG
1	NINC	II	1663586	1663689	103	ATTC
1	NINC	II	1668742	1668811	69	CTTT
2	NINC	II	167328	167392	64	TTAA
1	NINC	II	1686639	1687045	406	CTAG
1	NINC	II	1687259	1687938	679	ATAC
2	NINC	II	1688439	1688514	75	GTTC
1	NINC	II	1688443	1688517	74	GCTG
1	NINC	II	1696189	1696350	161	CAAC
1	NINC	II	1700401	1700498	97	GTGA
1	NINC	II	1716810	1724596	7786	TCTT
1	NINC	II	1723739	1723827	88	TCCG
1	NINC	II	173059	173142	83	GGGC
1	NINC	II	1756048	1756272	224	TTAC
2	NINC	II	1757000	1757087	87	GTTG
4	NINC	II	1757017	1757087	70	GTGG
1	NINC	II	1757771	1757852	81	ATTG
1	NINC	II	1758793	1759110	317	CTAT
1	NINC	II	1768248	1768492	244	CTGA
1	NINC	II	1773385	1773498	113	AAAC
1	NINC	II	1773608	1773677	69	TGCG
1	NINC	II	1776556	1776713	157	GTAT
1	NINC	II	1783839	1784234	395	AAAA
1	NINC	II	1786078	1786139	61	TAGC
1	NINC	II	1792737	1792865	128	GAAG
1	NINC	II	1794023	1794092	69	CAAT
1	NINC	II	1827530	1827671	141	AGGA
1	NINC	II	1831211	1831272	61	GTGG
1	NINC	II	1856049	1856634	585	CGAT
1	NINC	II	1859603	1860083	480	AGAA
1	NINC	II	1866396	1866911	515	ATAA
1	NINC	II	187518	187580	62	GCAG
2	NINC	II	1890819	1891051	232	TTAA
1	NINC	II	1891405	1891542	137	GTTG
1	NINC	II	1906441	1906491	50	GTGT
2	NINC	II	1909708	1909795	87	CTGG
1	NINC	II	1919988	1920053	65	GCAG
1	NINC	II	1920993	1921512	519	ATAC
1	NINC	II	1947213	1947285	72	GTCG
2	NINC	II	1948578	1948809	231	GAAG
1	NINC	II	1970822	1971110	288	TGAT
1	NINC	II	1974670	1975014	344	CTCC
1	NINC	II	197755	198055	300	CTAG
1	NINC	II	1990914	1991137	223	CCAA
1	NINC	II	2013093	2013584	491	TTGG
1	NINC	II	2014484	2014954	470	ATAG
1	NINC	II	2021459	2021510	51	GTTG
1	NINC	II	2024549	2024638	89	AAAG
1	NINC	II	202524	202610	86	TTAC
1	NINC	II	202556	202610	54	AAAC
1	NINC	II	202680	202830	150	CTCC
1	NINC	II	2033037	2034208	1171	ATAT
1	NINC	II	2045677	2045932	255	ATAC
1	NINC	II	2055032	2055594	562	TATG
1	NINC	II	209825	209922	97	GTGG
1	NINC	II	2115393	2115656	263	CTTC
1	NINC	II	2125024	2125277	253	GTCA
1	NINC	II	2125025	2125277	252	GTTC
1	NINC	II	2141638	2141691	53	AGTG
1	NINC	II	2141802	2141856	54	ATAG
1	NINC	II	2141934	2142030	96	CCAT
1	NINC	II	2151656	2151710	54	TGAT
1	NINC	II	2158491	2158801	310	ACAA
1	NINC	II	2169893	2171753	1860	TAAA
1	NINC	II	2188132	2189032	900	GTGG
1	NINC	II	2188164	2188254	90	GAAG
1	NINC	II	2201348	2201411	63	GTTG
1	NINC	II	2211185	2211387	202	CTAG
1	NINC	II	2212144	2212415	271	GGTG
1	NINC	II	2212145	2213047	902	ATAT
1	NINC	II	2212577	2212745	168	GAAG
1	NINC	II	2217972	2218100	128	TGCG
1	NINC	II	2236910	2237368	458	ATAG
2	NINC	II	224863	224936	73	GGAG
1	NINC	II	2277499	2278359	860	CAGG
1	NINC	II	2282451	2282505	54	GTTA
1	NINC	II	2286116	2286368	252	GGAG
1	NINC	II	2296708	2296893	185	GTCA
1	NINC	II	231860	231936	76	TCAG
1	NINC	II	231889	231964	75	ACTG
1	NINC	II	2324035	2324095	60	ATTG
1	NINC	II	2337114	2337678	564	TCAA
1	NINC	II	2341127	2341263	136	GTTG
1	NINC	II	2341503	2341724	221	TGAA
1	NINC	II	2343632	2345120	1488	GCGT
1	NINC	II	2343735	2343806	71	GTGC
4	NINC	II	2369189	2369245	56	GTGG
5	NINC	II	2369191	2369245	54	GTTA
1	NINC	II	2376559	2376609	50	GTGA
1	NINC	II	2388424	2388961	537	ATTG
1	NINC	II	2395073	2395239	166	GTAT
1	NINC	II	2418289	2426714	8425	AAGG
1	NINC	II	2421042	2421162	120	CTGG
1	NINC	II	2421045	2421135	90	CTTG
1	NINC	II	2421048	2421132	84	CTTG
1	NINC	II	2421051	2421114	63	CTAC
1	NINC	II	2421051	2421115	64	CCAC
1	NINC	II	2421093	2421204	111	CAAG
1	NINC	II	2421386	2421440	54	TAGG
1	NINC	II	2432227	2432278	51	GTGT
2	NINC	II	2432540	2432765	225	ATAA
2	NINC	II	2447199	2447283	84	ATGG
3	NINC	II	2449226	2449863	637	CTAC
1	NINC	II	2449779	2449932	153	CCTC
1	NINC	II	246499	246549	50	CGAT
1	NINC	II	2466509	2466604	95	CATT
1	NINC	II	2467506	2468527	1021	GTTG
1	NINC	II	2477847	2478512	665	ATCG
1	NINC	II	2521834	2522550	716	GCGT
1	NINC	II	2525007	2526128	1121	AGAA
1	NINC	II	2546878	2547267	389	CTAC
1	NINC	II	2550512	2552120	1608	ATAC
1	NINC	II	2553916	2554095	179	CACG
1	NINC	II	2592518	2593308	790	TTAT
1	NINC	II	2606362	2606414	52	GAAG
1	NINC	II	2610337	2610379	42	CTAC
1	NINC	II	2650820	2650880	60	AAGC
1	NINC	II	266672	266855	183	GACA
1	NINC	II	2677891	2677954	63	ACAA
1	NINC	II	2686452	2686639	187	GAGA
1	NINC	II	2694884	2695730	846	AAAC
1	NINC	II	2726637	2727505	868	ATAG
1	NINC	II	2727803	2727862	59	GTTG
2	NINC	II	2746717	2746838	121	GAAG
1	NINC	II	275531	275601	70	GTAA
1	NINC	II	2759863	2760059	196	ATAG
2	NINC	II	2764673	2764754	81	GTGA
1	NINC	II	2789149	2789240	91	TCCG
1	NINC	II	2789257	2789424	167	TAAA
1	NINC	II	2793017	2793071	54	GTTG
3	NINC	II	2802613	2802751	138	TTTG
1	NINC	II	2802928	2804167	1239	CTAA
1	NINC	II	2802934	2804176	1242	CTTA
1	NINC	II	2802955	2804176	1221	CTTA
1	NINC	II	2803127	2803707	580	AAAA
1	NINC	II	2803224	2803472	248	GTGG
1	NINC	II	2807941	2808094	153	CAAC
1	NINC	II	2808043	2808554	511	CGAA
1	NINC	II	2808208	2808274	66	CTGC
1	NINC	II	282562	283431	869	GAAG
1	NINC	II	2832794	2833425	631	ATGG
1	NINC	II	2841359	2841980	621	GTTG
1	NINC	II	2849897	2849972	75	GTAT
1	NINC	II	2849944	2850088	144	GCAC
1	NINC	II	286880	287244	364	CTTC
1	NINC	II	2874386	2874539	153	GTTA
1	NINC	II	2898758	2898870	112	TCCG
1	NINC	II	2947856	2948049	193	AAAA
1	NINC	II	2950704	2950771	67	GTGG
1	NINC	II	2950705	2950771	66	GTTG
1	NINC	II	2956855	2956905	50	GTGG
1	NINC	II	2956903	2956965	62	GTGT
1	NINC	II	2963263	2963327	64	GTGA
1	NINC	II	2975202	2975295	93	GCAG
1	NINC	II	2983488	2983605	117	GTTG
1	NINC	II	3001258	3002145	887	GTAT
1	NINC	II	3005781	3006095	314	ATAA
1	NINC	II	3008935	3008995	60	GTTG
2	NINC	II	3020933	3021178	245	ACGA
1	NINC	II	3039864	3040497	633	AGAG
1	NINC	II	3050191	3050241	50	AGTT
1	NINC	II	3053663	3054424	761	GTCG
1	NINC	II	3070756	3071355	599	ATTT
1	NINC	II	3071010	3071121	111	GCAG
1	NINC	II	3072629	3072693	64	GTTA
1	NINC	II	3072629	3072695	66	GTGG
1	NINC	II	3089333	3089391	58	GTTA
1	NINC	II	3089333	3089393	60	GTGG
7	NINC	II	3093261	3093311	50	GGAA
1	NINC	II	3095887	3096152	265	TGAG
1	NINC	II	3103217	3103310	93	CCAG
1	NINC	II	3104254	3104870	616	GAAG
1	NINC	II	3104330	3104453	123	AAGC
1	NINC	II	3104626	3104765	139	ACTC
1	NINC	II	3104940	3111617	6677	CAAG
4	NINC	II	3107882	3108289	407	TATC
1	NINC	II	3108430	3108507	77	GTGA
1	NINC	II	3111599	3111696	97	GTGA
3	NINC	II	3114504	3114846	342	CTAT
1	NINC	II	3115789	3115844	55	AGTA
3	NINC	II	3115791	3115842	51	GTGG
3	NINC	II	3115911	3115963	52	GAAG
1	NINC	II	3147875	3148150	275	GGAG
1	NINC	II	3148769	3149038	269	ATCA
1	NINC	II	3148769	3149040	271	ATAA
1	NINC	II	3148769	3149041	272	ATAA
2	NINC	II	3148769	3149042	273	ATAA
1	NINC	II	3160352	3160498	146	GAAA
1	NINC	II	3167324	3167401	77	GCTG
1	NINC	II	3168011	3168258	247	CATT
1	NINC	II	3178642	3178692	50	GGAG
2	NINC	II	3180057	3180637	580	GTTT
1	NINC	II	3186664	3186810	146	TCAA
1	NINC	II	3209852	3209902	50	GTTG
1	NINC	II	3215210	3215479	269	GTGT
1	NINC	II	3215429	3215479	50	GTGT
1	NINC	II	3219028	3219121	93	GTAT
1	NINC	II	3220174	3220361	187	AACC
1	NINC	II	3226732	3227170	438	TAAT
1	NINC	II	3230114	3230164	50	TAAT
2	NINC	II	3243117	3243480	363	GTTG
1	NINC	II	3243183	3243477	294	ATAG
1	NINC	II	3245630	3245745	115	CTAT
1	NINC	II	3267224	3267458	234	ATCA
1	NINC	II	3267802	3267855	53	GTGT
1	NINC	II	3272060	3272153	93	TTTG
1	NINC	II	3317014	3317110	96	CTTC
1	NINC	II	3322137	3322863	726	AAAG
3	NINC	II	3339632	3339995	363	GGCT
1	NINC	II	3340898	3340985	87	GTGA
5	NINC	II	334366	352601	18235	ACCC
2	NINC	II	3350879	3350929	50	GTAT
1	NINC	II	3361819	3361870	51	GTTA
2	NINC	II	3361819	3361872	53	GTGG
1	NINC	II	3365871	3365997	126	AAAG
1	NINC	II	337062	337201	139	GTTT
1	NINC	II	3378179	3378343	164	ATAC
2	NINC	II	3380147	3381208	1061	TTTT
6	NINC	II	3388067	3389394	1327	ACCA
1	NINC	II	3389449	3390279	830	GTTG
1	NINC	II	3391837	3392270	433	GAAA
3	NINC	II	3392217	3393180	963	TCTT
1	NINC	II	3404256	3404999	743	ATAC
1	NINC	II	3418095	3418182	87	CTGC
3	NINC	II	3418101	3418188	87	ATTC
2	NINC	II	3423159	3423231	72	GATG
1	NINC	II	3429842	3430383	541	GAGG
1	NINC	II	3433815	3433865	50	TCAT
1	NINC	II	343626	343770	144	GTGG
5	NINC	II	343628	343771	143	GGTA
8	NINC	II	344134	344185	51	GTGA
5	NINC	II	3443324	3444073	749	CTAA
1	NINC	II	3455005	3455098	93	CTCG
1	NINC	II	3466710	3466995	285	GTGG
1	NINC	II	3469652	3470268	616	ATAC
1	NINC	II	347860	352601	4741	TACC
3	NINC	II	349232	349323	91	CGAC
1	NINC	II	3500534	3500917	383	ATAG
1	NINC	II	3506640	3506991	351	GTAT
1	NINC	II	3513653	3513704	51	GTTA
1	NINC	II	3513920	3528769	14849	ATAC
1	NINC	II	3518266	3518722	456	TTGG
1	NINC	II	3519053	3519107	54	AAAA
1	NINC	II	3519053	3519108	55	AAAA
2	NINC	II	3522916	3522999	83	AAAT
2	NINC	II	3534014	3534999	985	CGAC
1	NINC	II	3536723	3536775	52	GTGG
1	NINC	II	3560655	3560705	50	GTAT
5	NINC	II	3580975	3581093	118	GTTG
1	NINC	II	3583302	3583437	135	ATAC
2	NINC	II	3583422	3583482	60	GCGG
1	NINC	II	360138	360188	50	GCAG
1	NINC	II	360138	360191	53	GCAG
1	NINC	II	3627487	3629348	1861	ATAC
1	NINC	II	3630071	3630171	100	GCAG
1	NINC	II	3630071	3630177	106	GCAG
1	NINC	II	3634157	3634225	68	TGGT
1	NINC	II	3634159	3634229	70	AGAG
2	NINC	II	3635427	3635655	228	CTAA
1	NINC	II	3637027	3637348	321	GTTC
1	NINC	II	3645049	3645185	136	GTGG
1	NINC	II	3646437	3646491	54	GTGT
1	NINC	II	3664003	3664153	150	TGGG
1	NINC	II	366532	366628	96	GAAA
1	NINC	II	3680508	3680658	150	TTAA
1	NINC	II	3684969	3685094	125	GTAA
1	NINC	II	3690553	3690659	106	GAAA
1	NINC	II	3702081	3702147	66	GTTG
1	NINC	II	3710474	3710816	342	TTGA
1	NINC	II	3724410	3724556	146	TAAG
1	NINC	II	3734727	3734961	234	ACCT
1	NINC	II	3736685	3736763	78	AAAA
1	NINC	II	3736792	3737429	637	CACG
1	NINC	II	3758462	3758766	304	GAAG
1	NINC	II	3759323	3759377	54	TGAG
1	NINC	II	3760649	3760727	78	ATAC
1	NINC	II	3770775	3770825	50	GTTG
1	NINC	II	378223	378276	53	GCAG
2	NINC	II	3802294	3803172	878	AAAG
1	NINC	II	3808695	3808768	73	AAAG
1	NINC	II	3809956	3810949	993	TAAG
1	NINC	II	3827439	3828008	569	AAAA
1	NINC	II	3828461	3828701	240	GTTG
2	NINC	II	3828461	3828722	261	GTGC
1	NINC	II	384993	385525	532	GCTG
1	NINC	II	3850703	3850844	141	TTAA
1	NINC	II	3886302	3886780	478	ATTG
1	NINC	II	3892350	3892404	54	GTGA
3	NINC	II	3912404	3912455	51	GTTA
1	NINC	II	3916796	3917080	284	ATAC
1	NINC	II	3934672	3934794	122	TTAA
1	NINC	II	3943416	3943532	116	CAAA
1	NINC	II	3946178	3947063	885	ATTG
1	NINC	II	3946556	3946880	324	GTTG
1	NINC	II	3954562	3962288	7726	ATAG
2	NINC	II	3957783	3957864	81	CTAA
1	NINC	II	3964458	3964781	323	TTTG
1	NINC	II	3964517	3964752	235	GTTG
1	NINC	II	3964751	3965336	585	TGGG
1	NINC	II	3965538	3965737	199	GATG
1	NINC	II	3969559	3969658	99	AAAG
1	NINC	II	3977124	3977283	159	TGCA
1	NINC	II	3980488	3996527	16039	AAAT
4	NINC	II	3980488	4001575	21087	TATT
1	NINC	II	4005074	4005485	411	AAAG
1	NINC	II	4005531	4005813	282	CGTA
1	NINC	II	4025371	4027078	1707	GGAA
1	NINC	II	402699	402867	168	ATTG
1	NINC	II	4029381	4029499	118	GGAG
1	NINC	II	4029437	4029494	57	GATA
1	NINC	II	4036464	4036915	451	TCCG
1	NINC	II	4040386	4041073	687	AAAG
1	NINC	II	4045960	4046143	183	ATAC
1	NINC	II	4050567	4050656	89	ATAA
1	NINC	II	4069467	4069635	168	CTAA
1	NINC	II	4069525	4069601	76	GAGG
1	NINC	II	407394	407451	57	GTGT
2	NINC	II	4074183	4074237	54	GCAG
13	NINC	II	4086953	4087004	51	GAAG
1	NINC	II	4087481	4087901	420	GAAG
4	NINC	II	4092165	4092934	769	CAGG
1	NINC	II	4107282	4123108	15826	TATT
1	NINC	II	4123169	4123245	76	AACT
1	NINC	II	4127342	4127901	559	GCCG
1	NINC	II	4135229	4136349	1120	ACAA
1	NINC	II	4140418	4141904	1486	TTTG
1	NINC	II	4145929	4145986	57	ATAG
1	NINC	II	4145931	4145986	55	ATAC
82	NINC	II	4147577	4147856	279	GTTG
1	NINC	II	4158181	4158861	680	CTTC
7	NINC	II	4158185	4158865	680	TTTC
2	NINC	II	4158282	4158852	570	AAAG
1	NINC	II	4158305	4158665	360	GTTG
1	NINC	II	4158978	4159038	60	GAAG
1	NINC	II	4159195	4159273	78	GTAA
1	NINC	II	4176263	4177136	873	CTGC
1	NINC	II	4185562	4186459	897	ATAC
1	NINC	II	419218	419272	54	AGAG
1	NINC	II	4200277	4200334	57	GTCA
1	NINC	II	4206507	4207028	521	GTAA
1	NINC	II	4207218	4207561	343	TTCG
1	NINC	II	4221292	4222318	1026	ACCG
1	NINC	II	4224405	4224486	81	CCTT
4	NINC	II	4242071	4242193	122	GCAG
1	NINC	II	424707	424761	54	CTAC
1	NINC	II	4248556	4248896	340	TTAC
1	NINC	II	4268985	4269661	676	AAAC
1	NINC	II	4272695	4272907	212	CAGG
2	NINC	II	4273109	4274224	1115	GAAT
1	NINC	II	4273401	4273651	250	GAGG
1	NINC	II	4274064	4274151	87	ATAC
2	NINC	II	4275287	4275337	50	GGAA
4	NINC	II	4275288	4275339	51	GTGG
1	NINC	II	4282739	4282811	72	GGAG
1	NINC	II	4284828	4285077	249	GCAG
1	NINC	II	428581	428633	52	GTTG
1	NINC	II	429223	429364	141	GTTT
1	NINC	II	4319798	4320035	237	CACA
1	NINC	II	4342026	4342123	97	ATAA
1	NINC	II	4342139	4343342	1203	ATAC
1	NINC	II	4342308	4342407	99	TGAC
1	NINC	II	435613	435981	368	CTTT
1	NINC	II	4380912	4381034	122	AAAG
1	NINC	II	442826	442893	67	GGTT
1	NINC	II	4445270	4445387	117	ACAG
1	NINC	II	4465225	4465893	668	GTAT
1	NINC	II	4465298	4465714	416	ATCG
1	NINC	II	4465840	4465993	153	GTGG
1	NINC	II	4466097	4466204	107	GTAT
1	NINC	II	4474570	4493022	18452	TTTT
2	NINC	II	4486228	4486592	364	GAAG
1	NINC	II	450716	450819	103	TTCG
1	NINC	II	454180	454506	326	AAAG
1	NINC	II	454430	456220	1790	AAAG
1	NINC	II	454466	456046	1580	GAGC
1	NINC	II	454797	455587	790	CAAT
1	NINC	II	470265	471027	762	TTTA
1	NINC	II	491620	491675	55	GTGT
5	NINC	II	492270	492320	50	AGTT
1	NINC	II	492459	492631	172	CTAG
1	NINC	II	492941	493002	61	TTAA
1	NINC	II	493480	493584	104	TGAG
3	NINC	II	513640	513694	54	GTTG
1	NINC	II	527123	527198	75	TTTT
1	NINC	II	527129	527207	78	AAAA
1	NINC	II	537484	537584	100	GCTT
1	NINC	II	558432	558510	78	CAAG
4	NINC	II	558762	558879	117	TTTG
1	NINC	II	579060	579188	128	CAAC
1	NINC	II	608250	608983	733	CAGC
1	NINC	II	621476	621536	60	CATG
1	NINC	II	626324	626447	123	CCCC
1	NINC	II	626574	627462	888	CGAA
1	NINC	II	626638	627190	552	AGCA
1	NINC	II	627096	627168	72	TCGG
1	NINC	II	627123	627252	129	GTGA
1	NINC	II	627217	627280	63	GTTG
1	NINC	II	631742	631928	186	GTGT
1	NINC	II	632433	632628	195	GCAG
1	NINC	II	715738	715981	243	GTGG
1	NINC	II	733261	733444	183	CTAC
1	NINC	II	741143	741248	105	TGAT
1	NINC	II	757953	758003	50	AGTC
3	NINC	II	771430	772083	653	CTTT
1	NINC	II	805498	805589	91	GTCG
11	NINC	II	811444	812218	774	TTAG
1	NINC	II	811943	812074	131	CCCC
1	NINC	II	857848	857910	62	TTGC
122	NINC	II	857849	857911	62	ATCG
1	NINC	II	862090	862160	70	ACAA
1	NINC	II	887986	888512	526	GTAT
1	NINC	II	93042	98559	5517	TTAA
3	NINC	II	93051	98570	5519	TTTT
2	NINC	II	932171	932322	151	TTAA
1	NINC	II	933583	934146	563	TCAG
11	NINC	II	933675	934151	476	GGGC
1	NINC	II	933704	934146	442	TCAG
1	NINC	II	933854	933944	90	CTAC
1	NINC	II	940862	940928	66	AAAG
1	NINC	II	943524	943803	279	ATGG
1	NINC	II	950823	950874	51	GTTG
1	NINC	II	951078	951402	324	GCAG
1	NINC	II	953868	953919	51	GTAT
1	NINC	II	969695	969780	85	AGTA
4	NINC	II	969696	969779	83	GGTT
2	NINC	III	1001124	1001205	81	CTAA
1	NINC	III	1003338	1006931	3593	CGAG
1	NINC	III	102413	102493	80	GTTG
1	NINC	III	1031901	1031961	60	GGAG
1	NINC	III	1033958	1034027	69	TGAG
1	NINC	III	1044570	1044812	242	GTGA
1	NINC	III	1045811	1046134	323	GGTG
1	NINC	III	1048915	1048980	65	GCTA
1	NINC	III	109673	109840	167	ATCT
1	NINC	III	1152899	1153220	321	TTCG
1	NINC	III	1168094	1168244	150	CTAC
1	NINC	III	1176871	1176952	81	GGAG
1	NINC	III	1184258	1184326	68	GGTG
1	NINC	III	1212273	1212346	73	GTGG
5	NINC	III	1261757	1262264	507	ACTG
1	NINC	III	1261760	1262240	480	CTTC
4	NINC	III	1264115	1264190	75	GCAG
1	NINC	III	1265396	1266883	1487	ATAA
1	NINC	III	1292702	1293006	304	GTGT
1	NINC	III	1298294	1298349	55	GTTA
1	NINC	III	1308567	1308739	172	ATTG
1	NINC	III	1309918	1310038	120	CTTT
1	NINC	III	1310243	1310273	30	CTAC
1	NINC	III	1332029	1332099	70	GGTG
1	NINC	III	1367468	1367601	133	TTCC
1	NINC	III	1400387	1400441	54	GTAT
1	NINC	III	1401668	1401721	53	GTTG
8	NINC	III	1401830	1401899	69	TTAG
1	NINC	III	1419962	1420857	895	ACCG
1	NINC	III	1420263	1420323	60	ATAC
1	NINC	III	1438391	1438451	60	GCAG
1	NINC	III	1440176	1440931	755	ACTT
1	NINC	III	1454040	1454388	348	CCTG
1	NINC	III	1454822	1455015	193	GACT
2	NINC	III	1454822	1455016	194	AGCT
1	NINC	III	1456318	1456592	274	CTAA
1	NINC	III	1471797	1471856	59	GTTG
1	NINC	III	1472080	1472143	63	TTGC
2	NINC	III	1489039	1489759	720	ATAC
1	NINC	III	1505846	1505914	68	CTAG
1	NINC	III	1505954	1506567	613	GTAC
1	NINC	III	151470	151521	51	TTCG
1	NINC	III	1532465	1533200	735	CCAG
1	NINC	III	1532583	1534236	1653	ATAG
1	NINC	III	1532713	1532834	121	TTAC
1	NINC	III	1541472	1541609	137	ATGA
1	NINC	III	1549262	1549359	97	TTAG
1	NINC	III	155051	155141	90	GTTG
1	NINC	III	1577671	1577743	72	ATGG
1	NINC	III	1591323	1591837	514	AAAC
35	NINC	III	1591352	1591475	123	CAAC
1	NINC	III	1591355	1591499	144	ATAC
1	NINC	III	1591355	1591706	351	ATAC
2	NINC	III	1591356	1591975	619	TAGG
1	NINC	III	1591380	1591489	109	TGGG
1	NINC	III	1591424	1591589	165	TTAG
2	NINC	III	1591437	1591579	142	CCGT
1	NINC	III	1591443	1591584	141	CCCG
11	NINC	III	1591443	1591606	163	CCAC
1	NINC	III	1591467	1591640	173	TGAG
1	NINC	III	1591481	1591640	159	TAAG
1	NINC	III	1591488	1591557	69	GTCG
2	NINC	III	1591488	1591599	111	GTCG
1	NINC	III	1591492	1591579	87	CTGT
1	NINC	III	1591521	1591599	78	GTCG
1	NINC	III	1591544	1591643	99	ATGG
1	NINC	III	1591557	1591905	348	GTTG
1	NINC	III	1591755	1591806	51	TTGG
1	NINC	III	1591787	1591856	69	GAAG
3	NINC	III	1591849	1592011	162	CTGC
1	NINC	III	1591849	1592021	172	CTTC
1	NINC	III	1591856	1591934	78	GAAC
3	NINC	III	1591860	1591919	59	CCAT
1	NINC	III	1591887	1591940	53	GCAG
4	NINC	III	1591905	1592076	171	GTCG
2	NINC	III	1591940	1592063	123	GCAG
1	NINC	III	1591985	1592063	78	GCAG
1	NINC	III	1591995	1592077	82	TCGG
1	NINC	III	1592000	1592117	117	TCAG
1	NINC	III	1592012	1592063	51	GAAG
1	NINC	III	1592021	1592092	71	CTAC
1	NINC	III	1592064	1592107	43	CTAC
2	NINC	III	1592068	1592158	90	CAAC
1	NINC	III	1592085	1592145	60	ACCC
1	NINC	III	1592122	1592188	66	CGGC
1	NINC	III	1592130	1592192	62	CTAG
2	NINC	III	1592220	1592506	286	TTCG
1	NINC	III	1592310	1592399	89	CTAC
5	NINC	III	1592342	1592503	161	CCGG
1	NINC	III	1592343	1592503	160	CCGG
9	NINC	III	1592349	1592509	160	TCTG
1	NINC	III	1592353	1592503	150	CCGG
8	NINC	III	1592364	1592415	51	ATGA
1	NINC	III	1592419	1592641	222	GATG
1	NINC	III	1592889	1594935	2046	TTAA
1	NINC	III	1601250	1605504	4254	CTAC
1	NINC	III	1607241	1607395	154	GTTG
1	NINC	III	1615767	1615947	180	GAGG
1	NINC	III	1626560	1626618	58	GTGA
2	NINC	III	162744	162813	69	GCAG
1	NINC	III	163906	163959	53	GTGT
3	NINC	III	1648406	1648495	89	TTAA
1	NINC	III	165178	165229	51	GTGA
1	NINC	III	1660544	1660601	57	ATTG
1	NINC	III	1686072	1686146	74	CTTC
1	NINC	III	1688081	1688578	497	GTGG
1	NINC	III	1691569	1702502	10933	ATAA
1	NINC	III	1698054	1698318	264	GAAG
1	NINC	III	1703882	1704346	464	CCGC
1	NINC	III	1733800	1743459	9659	GTAT
1	NINC	III	174237	174462	225	CTTC
1	NINC	III	174290	174350	60	ACTG
1	NINC	III	174395	174839	444	GATG
1	NINC	III	174419	174515	96	GTTG
1	NINC	III	174545	174620	75	GAAG
1	NINC	III	174545	174668	123	GAAG
1	NINC	III	174587	174950	363	CTCT
1	NINC	III	174675	175101	426	CAGG
1	NINC	III	1757660	1757807	147	GTAT
1	NINC	III	1789713	1789801	88	TTTG
1	NINC	III	1792156	1792215	59	GTGG
1	NINC	III	1827243	1827293	50	GGCA
1	NINC	III	1830971	1831087	116	GTGC
1	NINC	III	1839160	1839225	65	CTAA
1	NINC	III	1839350	1839450	100	CCTC
1	NINC	III	1842160	1842677	517	TTAT
1	NINC	III	1861458	1861635	177	TGAG
1	NINC	III	1864605	1864683	78	ATAC
1	NINC	III	1868126	1869292	1166	GAAG
1	NINC	III	1868355	1868933	578	GCAA
1	NINC	III	1868423	1868556	133	CTAT
1	NINC	III	1868469	1868985	516	GAGA
1	NINC	III	190845	191016	171	GTCG
1	NINC	III	1926168	1927095	927	CTAA
1	NINC	III	1973443	1973662	219	GTAA
1	NINC	III	1975234	1975370	136	CAAC
1	NINC	III	2007372	2007498	126	CTCT
1	NINC	III	2012613	2012817	204	GTGG
1	NINC	III	2012613	2012820	207	GTTG
3	NINC	III	2013468	2013981	513	TCAC
1	NINC	III	2014921	2015688	767	CTGC
4	NINC	III	2018525	2018624	99	CTTT
1	NINC	III	2032078	2032893	815	ATGG
1	NINC	III	2033310	2033363	53	CTAC
1	NINC	III	2035526	2042065	6539	GAAC
1	NINC	III	2035527	2042069	6542	AAAG
2	NINC	III	2048872	2048958	86	ATAA
1	NINC	III	2049001	2049091	90	TTAT
1	NINC	III	2054735	2054895	160	CTAC
1	NINC	III	2058412	2059040	628	TTTG
1	NINC	III	2064512	2064820	308	ATAG
1	NINC	III	2070554	2070638	84	CAAA
1	NINC	III	2092412	2093219	807	AGAC
1	NINC	III	2092835	2093217	382	ATAA
1	NINC	III	2095635	2095961	326	GGAA
1	NINC	III	2095640	2095985	345	GCGC
5	NINC	III	2125187	2125256	69	GTGG
1	NINC	III	212714	213560	846	CATC
1	NINC	III	2127604	2127661	57	TAAA
1	NINC	III	212974	213938	964	GAAA
1	NINC	III	2130747	2130869	122	CAAC
1	NINC	III	213444	214099	655	GTCA
1	NINC	III	2143042	2143114	72	TAAT
1	NINC	III	2144204	2144254	50	GTTG
1	NINC	III	2152748	2152869	121	GTGT
2	NINC	III	2156079	2156937	858	TTTC
1	NINC	III	2156435	2156529	94	GAAA
1	NINC	III	2157099	2157191	92	TTAG
1	NINC	III	2159611	2159760	149	GTAA
1	NINC	III	2160097	2160817	720	CTAG
1	NINC	III	2169637	2169815	178	CATT
1	NINC	III	2192685	2192737	52	GTTG
1	NINC	III	2192769	2192930	161	TGAT
1	NINC	III	2194548	2194878	330	GGAG
2	NINC	III	2194551	2194881	330	AAAG
2	NINC	III	2194551	2194925	374	CGAG
1	NINC	III	2194557	2194624	67	GGTG
1	NINC	III	2194864	2194991	127	TCCA
2	NINC	III	2194867	2195005	138	GCCT
1	NINC	III	2196534	2196645	111	GTAT
1	NINC	III	2197859	2198062	203	AATG
9	NINC	III	2206602	2206658	56	AGCT
1	NINC	III	2231786	2231929	143	GTCA
1	NINC	III	2232136	2232194	58	GTGT
2	NINC	III	2232220	2232475	255	AAAG
2	NINC	III	2232221	2232475	254	AAAG
3	NINC	III	2259650	2259710	60	CATT
1	NINC	III	2266816	2267076	260	GGCG
1	NINC	III	227396	228699	1303	TGGG
1	NINC	III	227963	228032	69	CAAC
1	NINC	III	2293307	2293368	61	TTAT
1	NINC	III	2293380	2293968	588	GTCG
1	NINC	III	229411	229477	66	GTGG
1	NINC	III	2334095	2334540	445	AAAG
1	NINC	III	2347848	2348483	635	CTCC
1	NINC	III	2350983	2351475	492	GAAA
1	NINC	III	2356126	2362187	6061	GATA
2	NINC	III	2366865	2366958	93	GTGG
8	NINC	III	2386407	2386554	147	ATAT
1	NINC	III	2395818	2396388	570	TCTG
2	NINC	III	262884	262971	87	GTGA
2	NINC	III	263041	263093	52	GTGA
2	NINC	III	263269	263449	180	CAAT
3	NINC	III	276143	277717	1574	ATAG
1	NINC	III	283453	283800	347	CGAT
1	NINC	III	284010	284112	102	TTTC
1	NINC	III	294786	295020	234	AGAG
2	NINC	III	316780	317716	936	GGTT
1	NINC	III	321777	321976	199	ATTT
1	NINC	III	328248	329153	905	TTGG
1	NINC	III	328596	328895	299	AAAC
1	NINC	III	349473	350076	603	CGAC
1	NINC	III	349804	350927	1123	AAAG
1	NINC	III	350537	350882	345	CTTC
1	NINC	III	358297	358348	51	TGAG
1	NINC	III	358370	358454	84	TTTG
1	NINC	III	387071	388233	1162	GCAT
2	NINC	III	391046	391235	189	ATTG
1	NINC	III	403233	404334	1101	AAAA
1	NINC	III	408692	408757	65	GTGG
1	NINC	III	417161	417221	60	GCAT
1	NINC	III	422149	422254	105	GCAG
1	NINC	III	442574	442660	86	CTCG
3	NINC	III	444479	444549	70	TAAG
2	NINC	III	458207	459377	1170	TTAT
1	NINC	III	458273	458364	91	TTAT
1	NINC	III	458350	459302	952	GATG
1	NINC	III	471828	472244	416	TTAG
3	NINC	III	473831	474150	319	ATAA
1	NINC	III	474126	474890	764	TAAT
1	NINC	III	480647	480829	182	CACG
1	NINC	III	51536	51970	434	GTCA
1	NINC	III	562049	563122	1073	TTAT
2	NINC	III	566226	566643	417	CAAT
1	NINC	III	584665	584968	303	TTAT
1	NINC	III	629478	630316	838	GTTG
1	NINC	III	633557	633688	131	TTAT
1	NINC	III	667056	667483	427	TTAA
1	NINC	III	686373	686833	460	CTTG
1	NINC	III	686821	686971	150	AAGG
1	NINC	III	696300	696357	57	GTGA
1	NINC	III	699727	699824	97	GATT
1	NINC	III	702685	703699	1014	AAAA
1	NINC	III	705721	705807	86	GTGC
2	NINC	III	706061	706491	430	GGAG
7	NINC	III	707685	707755	70	GTGA
2	NINC	III	709808	710119	311	GTTC
1	NINC	III	733049	733102	53	GTGA
2	NINC	III	740880	740972	92	GTGG
1	NINC	III	749515	750052	537	TTCG
1	NINC	III	753137	753196	59	AATC
1	NINC	III	757761	757851	90	GTGT
1	NINC	III	773145	773243	98	AAGA
1	NINC	III	773410	773488	78	GTGT
1	NINC	III	774996	775970	974	GAAT
1	NINC	III	783108	783217	109	CTAT
1	NINC	III	783108	783218	110	CTTC
1	NINC	III	805628	805678	50	GGAA
1	NINC	III	805952	806005	53	GTTG
1	NINC	III	816105	816178	73	GTGC
1	NINC	III	827273	882011	54738	TGTG
1	NINC	III	842837	844096	1259	ATAG
2	NINC	III	846499	846734	235	GTTG
1	NINC	III	859669	859723	54	GTGA
1	NINC	III	863965	864759	794	AGCG
1	NINC	III	865404	866224	820	AGAG
1	NINC	III	910921	911063	142	GCAG
4	NINC	III	917866	917931	65	GTGG
5	NINC	III	930835	931224	389	GAAG
1	NINC	III	93496	93618	122	GTGG
1	NINC	III	945749	945799	50	AATC
1	NINC	III	94831	94909	78	GTGA
2	NINC	III	953333	953402	69	CGAG
1	NINC	III	953418	953488	70	CAAT
1	NINC	III	959831	960077	246	GTTG
7	NINC	III	960596	960992	396	GATG
3	NINC	III	974186	974723	537	CTGT
1	NINC	III	981491	981549	58	GTGG
3	NINC	III	991337	991729	392	TTAT
1	NINC	III	993299	993366	67	GCTG

## Sheet: Retained
6 retained intron: SPAC1002.07c:intron:[1808538,1808629] - 91
11 retained intron: SPAC1002.07c:intron:[1808660,1808706] - 46
32 retained intron: SPAC1002.07c:intron:[1808741,1808799] - 58
3 retained intron: SPAC1002.07c:intron:[1808918,1809165] - 247
73 retained intron: SPAC1002.15c:intron:[1826423,1826464] - 41
1 retained intron: SPAC1002.15c:intron:[1826547,1826602] - 55
4 retained intron: SPAC1006.03c:intron:[5071417,5071461] - 44
16 retained intron: SPAC1006.06:intron:[5084084,5084128] - 44
3 retained intron: SPAC1006.08:intron:[5088998,5089060] - 62
1 retained intron: SPAC1039.01:intron:[5445123,5445327] - 204
1 retained intron: SPAC1039.05c:intron:[5456788,5456839] - 51
2 retained intron: SPAC1039.05c:intron:[5457472,5457527] - 55
1 retained intron: SPAC1039.05c:intron:[5457826,5457871] - 45
2 retained intron: SPAC1039.05c:intron:[5459173,5459274] - 101
6 retained intron: SPAC1039.10:intron:[5470525,5470573] - 48
517 retained intron: SPAC1039.10:intron:[5471227,5471283] - 56
1 retained intron: SPAC105.01c:intron:[1743124,1743298] - 174
3 retained intron: SPAC105.02c:intron:[1744950,1745234] - 284
4 retained intron: SPAC105.02c:intron:[1745519,1745572] - 53
48 retained intron: SPAC1071.02:intron:[3858891,3858934] - 43
3 retained intron: SPAC1071.02:intron:[3859077,3859123] - 46
1 retained intron: SPAC1071.02:intron:[3861564,3861630] - 66
1 retained intron: SPAC1093.03:intron:[4613686,4613722] - 36
8 retained intron: SPAC1093.03:intron:[4614954,4614995] - 41
8 retained intron: SPAC1093.04c:intron:[4616623,4616667] - 44
1 retained intron: SPAC1093.04c:intron:[4617281,4617352] - 71
1 retained intron: SPAC1093.04c:intron:[4617935,4617996] - 61
18 retained intron: SPAC1093.04c:intron:[4618297,4618359] - 62
31 retained intron: SPAC10F6.04:intron:[1213504,1213548] - 44
1 retained intron: SPAC10F6.05c:intron:[1215638,1215722] - 84
4 retained intron: SPAC10F6.08c:intron:[1220440,1220494] - 54
1 retained intron: SPAC10F6.08c:intron:[1220703,1220754] - 51
14 retained intron: SPAC10F6.10:intron:[1225725,1225810] - 85
4 retained intron: SPAC10F6.10:intron:[1225936,1226038] - 102
6 retained intron: SPAC10F6.16:intron:[1238979,1239024] - 45
3 retained intron: SPAC10F6.16:intron:[1239108,1239172] - 64
9 retained intron: SPAC110.03:intron:[1916155,1916318] - 163
19 retained intron: SPAC110.03:intron:[1916387,1916817] - 430
25 retained intron: SPAC110.04c:intron:[1920201,1920606] - 405
1 retained intron: SPAC110.05:intron:[1904455,1904498] - 43
1 retained intron: SPAC1142.02c:intron:[3628074,3628122] - 48
19 retained intron: SPAC1142.02c:intron:[3628743,3628783] - 40
41 retained intron: SPAC11D3.03c:intron:[112046,112097] - 51
3 retained intron: SPAC11D3.03c:intron:[112333,112377] - 44
1 retained intron: SPAC11D3.04c:intron:[113367,113434] - 67
1 retained intron: SPAC11D3.11c:intron:[129059,129102] - 43
5 retained intron: SPAC11E3.02c:intron:[5285570,5285616] - 46
1 retained intron: SPAC11E3.03:intron:[5286181,5286220] - 39
26 retained intron: SPAC11E3.03:intron:[5286562,5286608] - 46
10 retained intron: SPAC11E3.03:intron:[5286821,5286876] - 55
1 retained intron: SPAC11E3.04c:intron:[5287556,5287613] - 57
11 retained intron: SPAC11E3.04c:intron:[5287698,5287850] - 152
19 retained intron: SPAC11E3.04c:intron:[5288012,5288054] - 42
14 retained intron: SPAC11E3.06:intron:[5292938,5293022] - 84
1 retained intron: SPAC11E3.06:intron:[5293191,5293460] - 269
11 retained intron: SPAC11E3.09:intron:[5299125,5299230] - 105
1 retained intron: SPAC11E3.10:intron:[5300948,5301115] - 167
30 retained intron: SPAC11E3.10:intron:[5301302,5301349] - 47
2 retained intron: SPAC11E3.10:intron:[5301379,5301456] - 77
4 retained intron: SPAC11E3.12:intron:[5306043,5306102] - 59
4 retained intron: SPAC11E3.12:intron:[5306265,5306314] - 49
7 retained intron: SPAC11E3.15:intron:[5314867,5314913] - 46
149 retained intron: SPAC11E3.15:intron:[5315165,5315221] - 56
2 retained intron: SPAC11G7.02:intron:[3963413,3963464] - 51
1 retained intron: SPAC11G7.02:intron:[3963609,3963751] - 142
7 retained intron: SPAC11H11.01:intron:[4775894,4775933] - 39
1 retained intron: SPAC11H11.02c:intron:[4777498,4777536] - 38
2 retained intron: SPAC11H11.02c:intron:[4777956,4778008] - 52
16 retained intron: SPAC11H11.02c:intron:[4778147,4778253] - 106
38 retained intron: SPAC11H11.03c:intron:[4779484,4779522] - 38
18 retained intron: SPAC11H11.03c:intron:[4779667,4780022] - 355
65 retained intron: SPAC11H11.03c:intron:[4780185,4780240] - 55
1 retained intron: SPAC11H11.05c:intron:[4782195,4782242] - 47
1 retained intron: SPAC11H11.06:intron:[4783102,4783152] - 50
1 retained intron: SPAC1250.03:intron:[5098405,5098506] - 101
5 retained intron: SPAC1250.03:intron:[5098713,5098774] - 61
16 retained intron: SPAC1250.05:intron:[5095301,5095547] - 246
1 retained intron: SPAC1296.01c:intron:[708127,708167] - 40
4 retained intron: SPAC1296.01c:intron:[709339,709427] - 88
6 retained intron: SPAC1296.01c:intron:[709644,709744] - 100
6 retained intron: SPAC1296.02:intron:[711412,711767] - 355
1 retained intron: SPAC1296.04:intron:[715535,715582] - 47
13 retained intron: SPAC1296.04:intron:[715721,715993] - 272
15 retained intron: SPAC1296.04:intron:[716146,716222] - 76
2 retained intron: SPAC1296.05c:intron:[717585,717673] - 88
1 retained intron: SPAC1296.06:intron:[719581,719662] - 81
5 retained intron: SPAC1296.06:intron:[719740,719790] - 50
2 retained intron: SPAC1296.06:intron:[719888,719925] - 37
16 retained intron: SPAC1296.06:intron:[720024,720065] - 41
2 retained intron: SPAC12B10.04:intron:[4581783,4581835] - 52
13 retained intron: SPAC12B10.04:intron:[4581919,4581977] - 58
6 retained intron: SPAC12B10.05:intron:[4582549,4582594] - 45
1 retained intron: SPAC12B10.05:intron:[4582697,4582746] - 49
13 retained intron: SPAC12B10.05:intron:[4582767,4582806] - 39
29 retained intron: SPAC12B10.05:intron:[4582833,4582868] - 35
6 retained intron: SPAC12B10.05:intron:[4582882,4582930] - 48
18 retained intron: SPAC12B10.05:intron:[4583134,4583173] - 39
3 retained intron: SPAC12B10.05:intron:[4583557,4583618] - 61
12 retained intron: SPAC12B10.05:intron:[4583696,4583739] - 43
9 retained intron: SPAC12B10.05:intron:[4584118,4584162] - 44
2 retained intron: SPAC12B10.06c:intron:[4584676,4584732] - 56
1 retained intron: SPAC12B10.07:intron:[4585324,4585370] - 46
36 retained intron: SPAC12B10.07:intron:[4585564,4585628] - 64
3 retained intron: SPAC12B10.08c:intron:[4587390,4587449] - 59
1 retained intron: SPAC12B10.08c:intron:[4587937,4587982] - 45
48 retained intron: SPAC12B10.09:intron:[4588723,4588868] - 145
13 retained intron: SPAC12B10.09:intron:[4589323,4589409] - 86
1 retained intron: SPAC12B10.13:intron:[4596539,4596603] - 64
20 retained intron: SPAC12B10.13:intron:[4596799,4596843] - 44
25 retained intron: SPAC12B10.14c:intron:[4597621,4597679] - 58
1 retained intron: SPAC12B10.16c:intron:[4602981,4603146] - 165
1 retained intron: SPAC12G12.02:intron:[346051,346113] - 62
3 retained intron: SPAC12G12.02:intron:[346244,346306] - 62
32 retained intron: SPAC12G12.02:intron:[346439,346543] - 104
4 retained intron: SPAC12G12.07c:intron:[334782,334829] - 47
1 retained intron: SPAC12G12.11c:intron:[326856,326941] - 85
81 retained intron: SPAC12G12.11c:intron:[327391,327497] - 106
3 retained intron: SPAC12G12.12:intron:[324407,324461] - 54
3 retained intron: SPAC12G12.12:intron:[325166,325224] - 58
37 retained intron: SPAC12G12.15:intron:[317469,317513] - 44
3 retained intron: SPAC12G12.15:intron:[318172,318220] - 48
14 retained intron: SPAC12G12.17:intron:[333239,333290] - 51
1 retained intron: SPAC139.01c:intron:[1016669,1016729] - 60
4 retained intron: SPAC139.03:intron:[1022807,1022846] - 39
10 retained intron: SPAC139.03:intron:[1023794,1023835] - 41
2 retained intron: SPAC13A11.01c:intron:[574224,574268] - 44
1 retained intron: SPAC13A11.03:intron:[578586,578680] - 94
1 retained intron: SPAC13A11.04c:intron:[579789,579834] - 45
11 retained intron: SPAC13A11.04c:intron:[579899,579952] - 53
16 retained intron: SPAC13A11.04c:intron:[580250,580295] - 45
9 retained intron: SPAC13A11.04c:intron:[580983,581083] - 100
11 retained intron: SPAC13A11.04c:intron:[581216,581294] - 78
5 retained intron: SPAC13C5.02:intron:[426069,426105] - 36
21 retained intron: SPAC13C5.02:intron:[426322,426363] - 41
8 retained intron: SPAC13C5.03:intron:[427943,427985] - 42
8 retained intron: SPAC13C5.05c:intron:[432982,433027] - 45
2 retained intron: SPAC13C5.05c:intron:[433113,433153] - 40
28 retained intron: SPAC13C5.06c:intron:[434831,434875] - 44
4 retained intron: SPAC13C5.07:intron:[436935,437005] - 70
3 retained intron: SPAC13D6.03c:intron:[2250977,2251026] - 49
1 retained intron: SPAC13D6.04c:intron:[2252912,2252980] - 68
6 retained intron: SPAC13F5.01c:intron:[2169267,2169307] - 40
1 retained intron: SPAC13F5.01c:intron:[2169392,2169437] - 45
1 retained intron: SPAC13F5.02c:intron:[2173383,2173424] - 41
1 retained intron: SPAC13F5.06c:intron:[2181723,2181766] - 43
6 retained intron: SPAC13F5.06c:intron:[2181868,2181924] - 56
5 retained intron: SPAC13F5.06c:intron:[2183959,2184188] - 229
1 retained intron: SPAC13F5.07c:intron:[2185282,2185471] - 189
1 retained intron: SPAC13G6.04:intron:[180528,180585] - 57
13 retained intron: SPAC13G6.04:intron:[180721,180889] - 168
2 retained intron: SPAC13G6.05c:intron:[181436,181484] - 48
3 retained intron: SPAC13G6.05c:intron:[181574,181631] - 57
8 retained intron: SPAC13G6.05c:intron:[181749,182000] - 251
12 retained intron: SPAC13G6.11c:intron:[195258,195507] - 249
1 retained intron: SPAC13G6.12c:intron:[196174,196220] - 46
1 retained intron: SPAC13G7.01c:intron:[2293088,2293136] - 48
1 retained intron: SPAC13G7.01c:intron:[2293754,2293810] - 56
14 retained intron: SPAC13G7.01c:intron:[2294893,2294939] - 46
15 retained intron: SPAC13G7.03:intron:[2299133,2299192] - 59
10 retained intron: SPAC13G7.03:intron:[2299299,2299349] - 50
5 retained intron: SPAC13G7.07:intron:[2309212,2309258] - 46
42 retained intron: SPAC13G7.07:intron:[2309569,2309609] - 40
3 retained intron: SPAC13G7.07:intron:[2309667,2309713] - 46
4 retained intron: SPAC13G7.07:intron:[2309946,2309997] - 51
39 retained intron: SPAC13G7.07:intron:[2310088,2310129] - 41
3 retained intron: SPAC13G7.08c:intron:[2310517,2310560] - 43
2 retained intron: SPAC13G7.08c:intron:[2311571,2311693] - 122
14 retained intron: SPAC13G7.10:intron:[2313961,2314048] - 87
1 retained intron: SPAC13G7.10:intron:[2314131,2314189] - 58
2 retained intron: SPAC13G7.11:intron:[2315349,2315385] - 36
7 retained intron: SPAC13G7.11:intron:[2315599,2315700] - 101
36 retained intron: SPAC140.03:intron:[1900165,1900206] - 41
3 retained intron: SPAC140.03:intron:[1900346,1900385] - 39
3 retained intron: SPAC140.03:intron:[1900637,1900698] - 61
3 retained intron: SPAC1420.01c:intron:[1262609,1262654] - 45
1 retained intron: SPAC144.01:intron:[4650764,4650822] - 58
1 retained intron: SPAC144.03:intron:[4654727,4654766] - 39
68 retained intron: SPAC144.03:intron:[4654863,4655246] - 383
1 retained intron: SPAC144.05:intron:[4662883,4662921] - 38
2 retained intron: SPAC144.06:intron:[4664545,4664585] - 40
6 retained intron: SPAC144.06:intron:[4666668,4666713] - 45
1 retained intron: SPAC144.06:intron:[4666976,4667015] - 39
8 retained intron: SPAC144.08:intron:[4669710,4669753] - 43
1 retained intron: SPAC144.14:intron:[4682276,4682328] - 52
1 retained intron: SPAC144.15c:intron:[4685465,4685525] - 60
1 retained intron: SPAC144.17c:intron:[4687477,4687521] - 44
10 retained intron: SPAC144.17c:intron:[4688462,4688512] - 50
1 retained intron: SPAC1486.01:intron:[3185577,3185700] - 123
1 retained intron: SPAC1486.02c:intron:[3187722,3187810] - 88
3 retained intron: SPAC1486.02c:intron:[3187941,3188048] - 107
7 retained intron: SPAC1486.05:intron:[3197443,3197529] - 86
1 retained intron: SPAC1486.06:intron:[3203923,3204067] - 144
1 retained intron: SPAC1486.08:intron:[3207750,3207869] - 119
1 retained intron: SPAC1486.09:intron:[3210102,3210317] - 215
1 retained intron: SPAC14C4.03:intron:[5231296,5231336] - 40
10 retained intron: SPAC14C4.03:intron:[5231871,5231920] - 49
4 retained intron: SPAC14C4.06c:intron:[5239047,5239093] - 46
3 retained intron: SPAC14C4.06c:intron:[5239192,5239235] - 43
1 retained intron: SPAC14C4.10c:intron:[5246610,5246672] - 62
1 retained intron: SPAC14C4.11:intron:[5247923,5248130] - 207
1 retained intron: SPAC14C4.13:intron:[5253568,5253611] - 43
3 retained intron: SPAC14C4.14:intron:[5256843,5257012] - 169
8 retained intron: SPAC14C4.15c:intron:[5260252,5260296] - 44
1 retained intron: SPAC14C4.16:intron:[5229903,5229940] - 37
1 retained intron: SPAC1527.02:intron:[4383211,4383264] - 53
41 retained intron: SPAC1527.02:intron:[4383593,4383749] - 156
15 retained intron: SPAC1556.01c:intron:[3791851,3791890] - 39
9 retained intron: SPAC1556.01c:intron:[3792229,3792266] - 37
1 retained intron: SPAC1556.01c:intron:[3795557,3795600] - 43
2 retained intron: SPAC1556.01c:intron:[3795684,3795733] - 49
2 retained intron: SPAC1556.02c:intron:[3798226,3798347] - 121
1 retained intron: SPAC1556.03:intron:[3800135,3800183] - 48
2 retained intron: SPAC1556.04c:intron:[3800351,3800392] - 41
17 retained intron: SPAC1556.04c:intron:[3800471,3800534] - 63
1 retained intron: SPAC1556.04c:intron:[3800617,3800685] - 68
140 retained intron: SPAC1556.04c:intron:[3800747,3800799] - 52
26 retained intron: SPAC1556.05c:intron:[3801391,3801441] - 50
9 retained intron: SPAC1556.05c:intron:[3801589,3801633] - 44
14 retained intron: SPAC1556.05c:intron:[3801643,3801683] - 40
2 retained intron: SPAC1556.06:intron:[3804587,3804660] - 73
16 retained intron: SPAC1556.07:intron:[3805930,3806162] - 232
1 retained intron: SPAC1556.08c:intron:[3807775,3807830] - 55
14 retained intron: SPAC1556.08c:intron:[3807987,3808034] - 47
24 retained intron: SPAC1556.08c:intron:[3808393,3808447] - 54
10 retained intron: SPAC1556.08c:intron:[3808571,3808634] - 63
6 retained intron: SPAC1565.02c:intron:[1293689,1293751] - 62
1 retained intron: SPAC1565.04c:intron:[1296255,1296413] - 158
1 retained intron: SPAC1565.06c:intron:[1300242,1300281] - 39
23 retained intron: SPAC1565.06c:intron:[1300356,1300396] - 40
12 retained intron: SPAC1565.06c:intron:[1300480,1300633] - 153
2 retained intron: SPAC1565.06c:intron:[1300842,1300888] - 46
23 retained intron: SPAC1565.08:intron:[1306512,1306568] - 56
1 retained intron: SPAC15A10.05c:intron:[3685989,3686073] - 84
24 retained intron: SPAC15A10.05c:intron:[3686489,3686529] - 40
22 retained intron: SPAC15A10.05c:intron:[3686600,3686709] - 109
4 retained intron: SPAC15A10.06:intron:[3688806,3689321] - 515
29 retained intron: SPAC15A10.06:intron:[3689638,3689721] - 83
2 retained intron: SPAC15A10.06:intron:[3690441,3690483] - 42
1 retained intron: SPAC15A10.08:intron:[3693162,3693302] - 140
1 retained intron: SPAC15A10.10:intron:[3697752,3697794] - 42
27 retained intron: SPAC15A10.10:intron:[3698368,3698420] - 52
2 retained intron: SPAC15A10.10:intron:[3698527,3698569] - 42
2 retained intron: SPAC15A10.10:intron:[3699310,3699358] - 48
27 retained intron: SPAC15A10.10:intron:[3699538,3699581] - 43
2 retained intron: SPAC15A10.12c:intron:[3709346,3709498] - 152
1 retained intron: SPAC15A10.13:intron:[3711671,3711720] - 49
1 retained intron: SPAC15A10.13:intron:[3712014,3712066] - 52
1 retained intron: SPAC15A10.13:intron:[3712927,3712967] - 40
8 retained intron: SPAC15A10.13:intron:[3713096,3713146] - 50
2 retained intron: SPAC15A10.13:intron:[3713319,3713378] - 59
5 retained intron: SPAC15A10.15:intron:[3714223,3714261] - 38
1 retained intron: SPAC15A10.15:intron:[3714301,3714351] - 50
2 retained intron: SPAC15A10.15:intron:[3714584,3714627] - 43
5 retained intron: SPAC15E1.03:intron:[3722808,3722998] - 190
1 retained intron: SPAC15E1.05c:intron:[3726952,3727007] - 55
3 retained intron: SPAC15E1.05c:intron:[3727142,3727297] - 155
6 retained intron: SPAC15E1.06:intron:[3727525,3727603] - 78
1 retained intron: SPAC15E1.08:intron:[3729897,3729983] - 86
9 retained intron: SPAC15E1.08:intron:[3730178,3730493] - 315
8 retained intron: SPAC15E1.08:intron:[3730596,3730643] - 47
6 retained intron: SPAC15E1.08:intron:[3730700,3730903] - 203
10 retained intron: SPAC15E1.09:intron:[3731424,3731671] - 247
33 retained intron: SPAC15E1.09:intron:[3731692,3731739] - 47
20 retained intron: SPAC15E1.09:intron:[3731808,3731892] - 84
16 retained intron: SPAC15F9.01c:intron:[2397823,2397878] - 55
1 retained intron: SPAC15F9.02:intron:[2399487,2399528] - 41
24 retained intron: SPAC15F9.02:intron:[2400462,2400516] - 54
1 retained intron: SPAC15F9.03c:intron:[2401067,2401145] - 78
12 retained intron: SPAC15F9.03c:intron:[2401247,2401299] - 52
3 retained intron: SPAC15F9.03c:intron:[2401371,2401440] - 69
21 retained intron: SPAC15F9.03c:intron:[2401523,2401565] - 42
12 retained intron: SPAC16.01:intron:[4423027,4423111] - 84
3 retained intron: SPAC16.01:intron:[4423190,4423306] - 116
1 retained intron: SPAC16.01:intron:[4423312,4423365] - 53
22 retained intron: SPAC16.01:intron:[4423404,4423516] - 112
7 retained intron: SPAC16.01:intron:[4423557,4423625] - 68
4 retained intron: SPAC16.01:intron:[4423644,4423692] - 48
27 retained intron: SPAC16.01:intron:[4423964,4424011] - 47
5 retained intron: SPAC16.02c:intron:[4425837,4425892] - 55
7 retained intron: SPAC16.02c:intron:[4425992,4426036] - 44
3 retained intron: SPAC16.02c:intron:[4426110,4426198] - 88
8 retained intron: SPAC16.02c:intron:[4426268,4426458] - 190
16 retained intron: SPAC16.02c:intron:[4426601,4426653] - 52
18 retained intron: SPAC16.02c:intron:[4426736,4426792] - 56
4 retained intron: SPAC16.03c:intron:[4428611,4428688] - 77
1 retained intron: SPAC16.04:intron:[4429724,4429772] - 48
1 retained intron: SPAC1610.03c:intron:[1794497,1794588] - 91
1 retained intron: SPAC1610.03c:intron:[1794766,1794851] - 85
7 retained intron: SPAC1635.01:intron:[4649003,4649079] - 76
1 retained intron: SPAC1639.01c:intron:[252337,252391] - 54
7 retained intron: SPAC1639.01c:intron:[252752,253589] - 837
78 retained intron: SPAC1639.02c:intron:[256134,256344] - 210
4 retained intron: SPAC1639.02c:intron:[256370,256426] - 56
4 retained intron: SPAC1639.02c:intron:[256612,256683] - 71
1 retained intron: SPAC1639.02c:intron:[256750,256796] - 46
4 retained intron: SPAC1639.02c:intron:[257135,257178] - 43
9 retained intron: SPAC1639.02c:intron:[259120,259160] - 40
1 retained intron: SPAC167.01:intron:[1559639,1559689] - 50
1 retained intron: SPAC167.02:intron:[1557410,1557455] - 45
5 retained intron: SPAC167.02:intron:[1557589,1557627] - 38
6 retained intron: SPAC167.02:intron:[1557843,1557897] - 54
3 retained intron: SPAC167.02:intron:[1558014,1558069] - 55
1 retained intron: SPAC167.02:intron:[1558220,1558267] - 47
9 retained intron: SPAC167.04:intron:[1554072,1554134] - 62
8 retained intron: SPAC167.04:intron:[1554166,1554213] - 47
6 retained intron: SPAC167.04:intron:[1554292,1554380] - 88
7 retained intron: SPAC167.07c:intron:[1549487,1549545] - 58
1 retained intron: SPAC167.07c:intron:[1549602,1549646] - 44
1 retained intron: SPAC167.09:intron:[1558957,1559006] - 49
13 retained intron: SPAC167.09:intron:[1559127,1559173] - 46
6 retained intron: SPAC1687.01:intron:[903172,903245] - 73
4 retained intron: SPAC1687.01:intron:[903343,903391] - 48
12 retained intron: SPAC1687.01:intron:[903468,903545] - 77
30 retained intron: SPAC1687.03c:intron:[905977,906032] - 55
14 retained intron: SPAC1687.03c:intron:[906144,906287] - 143
18 retained intron: SPAC1687.04:intron:[907045,907089] - 44
1 retained intron: SPAC1687.05:intron:[908871,908923] - 52
1 retained intron: SPAC1687.10:intron:[920716,920768] - 52
1 retained intron: SPAC1687.11:intron:[922383,922424] - 41
1 retained intron: SPAC1687.12c:intron:[925446,925502] - 56
22 retained intron: SPAC1687.12c:intron:[925857,925961] - 104
14 retained intron: SPAC1687.12c:intron:[926066,926121] - 55
10 retained intron: SPAC1687.13c:intron:[926671,926735] - 64
4 retained intron: SPAC1687.13c:intron:[927381,927488] - 107
21 retained intron: SPAC1687.15:intron:[929957,930005] - 48
4 retained intron: SPAC1687.17c:intron:[935668,935746] - 78
10 retained intron: SPAC1687.17c:intron:[935812,935859] - 47
4 retained intron: SPAC1687.17c:intron:[935899,935942] - 43
1 retained intron: SPAC1687.18c:intron:[936371,936452] - 81
7 retained intron: SPAC1687.18c:intron:[937719,937759] - 40
4 retained intron: SPAC1687.18c:intron:[937891,937927] - 36
9 retained intron: SPAC1687.19c:intron:[938958,939001] - 43
3 retained intron: SPAC1687.19c:intron:[939575,939629] - 54
13 retained intron: SPAC1687.21:intron:[941989,942214] - 225
22 retained intron: SPAC1687.21:intron:[942296,942450] - 154
39 retained intron: SPAC1687.21:intron:[942573,942614] - 41
2 retained intron: SPAC1687.21:intron:[942680,942726] - 46
4 retained intron: SPAC1687.21:intron:[942748,942804] - 56
2 retained intron: SPAC1687.22c:intron:[943692,943740] - 48
1 retained intron: SPAC1687.22c:intron:[943904,943960] - 56
3 retained intron: SPAC16A10.02:intron:[3081104,3081154] - 50
1 retained intron: SPAC16A10.03c:intron:[3084081,3084124] - 43
2 retained intron: SPAC16A10.03c:intron:[3084190,3084229] - 39
1 retained intron: SPAC16A10.04:intron:[3087071,3087126] - 55
22 retained intron: SPAC16A10.04:intron:[3087168,3087229] - 61
5 retained intron: SPAC16A10.04:intron:[3087276,3087383] - 107
1 retained intron: SPAC16A10.04:intron:[3087587,3087703] - 116
3 retained intron: SPAC16A10.04:intron:[3087838,3087894] - 56
5 retained intron: SPAC16A10.06c:intron:[3090047,3090162] - 115
2 retained intron: SPAC16A10.06c:intron:[3090285,3090532] - 247
52 retained intron: SPAC16A10.08c:intron:[3094173,3094228] - 55
1 retained intron: SPAC16C9.01c:intron:[791851,792013] - 162
1 retained intron: SPAC16C9.01c:intron:[792091,792128] - 37
167 retained intron: SPAC16C9.02c:intron:[792949,793048] - 99
5 retained intron: SPAC16C9.02c:intron:[793609,793658] - 49
31 retained intron: SPAC16C9.04c:intron:[798229,798317] - 88
2 retained intron: SPAC16C9.04c:intron:[798497,798547] - 50
9 retained intron: SPAC16E8.02:intron:[3504269,3504310] - 41
1 retained intron: SPAC16E8.02:intron:[3504377,3504421] - 44
1 retained intron: SPAC16E8.02:intron:[3505014,3505580] - 566
12 retained intron: SPAC16E8.05c:intron:[3508050,3508093] - 43
1 retained intron: SPAC16E8.06c:intron:[3509854,3509899] - 45
1 retained intron: SPAC16E8.07c:intron:[3512794,3512847] - 53
1 retained intron: SPAC16E8.08:intron:[3514130,3514186] - 56
1 retained intron: SPAC16E8.10c:intron:[3519139,3519226] - 87
1 retained intron: SPAC16E8.11c:intron:[3520619,3520662] - 43
5 retained intron: SPAC16E8.11c:intron:[3521206,3521263] - 57
1 retained intron: SPAC16E8.11c:intron:[3521447,3521492] - 45
8 retained intron: SPAC16E8.11c:intron:[3522155,3522200] - 45
10 retained intron: SPAC16E8.11c:intron:[3522287,3522324] - 37
1 retained intron: SPAC16E8.12c:intron:[3523644,3523924] - 280
1 retained intron: SPAC16E8.12c:intron:[3523996,3524043] - 47
25 retained intron: SPAC16E8.12c:intron:[3524162,3524204] - 42
110 retained intron: SPAC16E8.14c:intron:[3527341,3527383] - 42
1 retained intron: SPAC16E8.14c:intron:[3527862,3528008] - 146
1 retained intron: SPAC16E8.14c:intron:[3528069,3528106] - 37
13 retained intron: SPAC16E8.15:intron:[3528385,3528453] - 68
30 retained intron: SPAC16E8.15:intron:[3528628,3528762] - 134
48 retained intron: SPAC16E8.16:intron:[3530470,3530614] - 144
1 retained intron: SPAC16E8.18c:intron:[3534738,3534876] - 138
3 retained intron: SPAC1705.02:intron:[1568869,1569063] - 194
23 retained intron: SPAC1705.02:intron:[1569160,1569215] - 55
2 retained intron: SPAC1751.02c:intron:[385887,385937] - 50
1 retained intron: SPAC1751.02c:intron:[386043,386106] - 63
8 retained intron: SPAC1751.03:intron:[386394,386457] - 63
8 retained intron: SPAC1751.04:intron:[384349,384479] - 130
21 retained intron: SPAC1751.04:intron:[384590,384985] - 395
9 retained intron: SPAC1751.04:intron:[385060,385124] - 64
2 retained intron: SPAC1782.02c:intron:[4760651,4760751] - 100
1 retained intron: SPAC1782.04:intron:[4763235,4763277] - 42
1 retained intron: SPAC1782.07:intron:[4767141,4767330] - 189
22 retained intron: SPAC1782.07:intron:[4767348,4767393] - 45
59 retained intron: SPAC1782.07:intron:[4767607,4767710] - 103
12 retained intron: SPAC1782.09c:intron:[4771555,4771610] - 55
1 retained intron: SPAC1782.11:intron:[4774260,4774366] - 106
1 retained intron: SPAC1782.12c:intron:[4773658,4773735] - 77
149 retained intron: SPAC1782.12c:intron:[4774934,4774990] - 56
3 retained intron: SPAC1782.12c:intron:[4775067,4775163] - 96
25 retained intron: SPAC1783.02c:intron:[2189845,2189906] - 61
2 retained intron: SPAC1783.02c:intron:[2190509,2190696] - 187
1 retained intron: SPAC1783.04c:intron:[2193163,2193288] - 125
1 retained intron: SPAC1783.06c:intron:[2199570,2199624] - 54
2 retained intron: SPAC1783.06c:intron:[2199761,2199825] - 64
11 retained intron: SPAC1786.01c:intron:[3028520,3028569] - 49
6 retained intron: SPAC1786.01c:intron:[3029905,3029971] - 66
62 retained intron: SPAC1786.01c:intron:[3030188,3030271] - 83
6 retained intron: SPAC1786.03:intron:[3037877,3037919] - 42
1 retained intron: SPAC17A2.03c:intron:[3556282,3556325] - 43
1 retained intron: SPAC17A2.07c:intron:[3567638,3567740] - 102
1 retained intron: SPAC17A2.08c:intron:[3569092,3569140] - 48
1 retained intron: SPAC17A2.13c:intron:[3583995,3584712] - 717
1 retained intron: SPAC17A5.02c:intron:[1754145,1754185] - 40
2 retained intron: SPAC17A5.02c:intron:[1754310,1754349] - 39
4 retained intron: SPAC17A5.02c:intron:[1755118,1755163] - 45
2 retained intron: SPAC17A5.02c:intron:[1755285,1755330] - 45
5 retained intron: SPAC17A5.04c:intron:[1758185,1758256] - 71
1 retained intron: SPAC17A5.07c:intron:[1764792,1764876] - 84
45 retained intron: SPAC17A5.07c:intron:[1765113,1765167] - 54
1 retained intron: SPAC17A5.07c:intron:[1765272,1765341] - 69
2 retained intron: SPAC17A5.07c:intron:[1766188,1766336] - 148
4 retained intron: SPAC17A5.07c:intron:[1766530,1766588] - 58
7 retained intron: SPAC17A5.07c:intron:[1766644,1766690] - 46
1 retained intron: SPAC17A5.08:intron:[1767710,1767783] - 73
1 retained intron: SPAC17A5.11:intron:[1773205,1773263] - 58
32 retained intron: SPAC17A5.11:intron:[1773372,1773422] - 50
2 retained intron: SPAC17A5.11:intron:[1773500,1773564] - 64
6 retained intron: SPAC17A5.13:intron:[1776608,1776661] - 53
11 retained intron: SPAC17A5.13:intron:[1776957,1777068] - 111
4 retained intron: SPAC17A5.14:intron:[1778563,1778601] - 38
1 retained intron: SPAC17A5.14:intron:[1778669,1778719] - 50
1 retained intron: SPAC17A5.16:intron:[1786542,1786604] - 62
4 retained intron: SPAC17A5.16:intron:[1786637,1786705] - 68
2 retained intron: SPAC17A5.16:intron:[1787658,1787714] - 56
1 retained intron: SPAC17A5.16:intron:[1788446,1788498] - 52
1 retained intron: SPAC17C9.01c:intron:[4498435,4498480] - 45
1 retained intron: SPAC17C9.05c:intron:[4490610,4490647] - 37
19 retained intron: SPAC17C9.05c:intron:[4490711,4490836] - 125
11 retained intron: SPAC17C9.05c:intron:[4490914,4490960] - 46
4 retained intron: SPAC17C9.05c:intron:[4491382,4491431] - 49
3 retained intron: SPAC17C9.08:intron:[4485274,4485349] - 75
6 retained intron: SPAC17C9.08:intron:[4485596,4485712] - 116
44 retained intron: SPAC17C9.09c:intron:[4484194,4484252] - 58
1 retained intron: SPAC17C9.09c:intron:[4484321,4484364] - 43
11 retained intron: SPAC17C9.11c:intron:[4481012,4481157] - 145
31 retained intron: SPAC17C9.11c:intron:[4481734,4481892] - 158
15 retained intron: SPAC17C9.12:intron:[4479295,4479376] - 81
5 retained intron: SPAC17C9.12:intron:[4479492,4479721] - 229
9 retained intron: SPAC17C9.14:intron:[4476474,4476616] - 142
1 retained intron: SPAC17C9.16c:intron:[4473271,4473324] - 53
1 retained intron: SPAC17D4.01:intron:[4723048,4723375] - 327
59 retained intron: SPAC17D4.01:intron:[4723508,4723637] - 129
26 retained intron: SPAC17D4.02:intron:[4726422,4726463] - 41
1 retained intron: SPAC17D4.04:intron:[4731893,4731937] - 44
6 retained intron: SPAC17G6.06:intron:[3599171,3599240] - 69
1 retained intron: SPAC17G6.12:intron:[3612191,3612236] - 45
4 retained intron: SPAC17G6.12:intron:[3612486,3612597] - 111
1 retained intron: SPAC17G6.12:intron:[3612674,3612876] - 202
1 retained intron: SPAC17G6.15c:intron:[3619703,3619807] - 104
5 retained intron: SPAC17G6.15c:intron:[3620143,3620183] - 40
2 retained intron: SPAC17G6.15c:intron:[3620257,3620370] - 113
2 retained intron: SPAC17G6.15c:intron:[3620480,3620528] - 48
32 retained intron: SPAC17G6.15c:intron:[3620554,3620594] - 40
3 retained intron: SPAC17G6.16c:intron:[3621470,3621513] - 43
8 retained intron: SPAC17G6.16c:intron:[3622060,3622104] - 44
14 retained intron: SPAC17G8.01c:intron:[2343706,2343753] - 47
1 retained intron: SPAC17G8.04c:intron:[2348614,2348704] - 90
33 retained intron: SPAC17G8.04c:intron:[2348881,2349007] - 126
36 retained intron: SPAC17G8.05:intron:[2350340,2350382] - 42
31 retained intron: SPAC17G8.05:intron:[2350471,2350540] - 69
3 retained intron: SPAC17G8.08c:intron:[2356154,2356425] - 271
1 retained intron: SPAC17G8.09:intron:[2357468,2357575] - 107
10 retained intron: SPAC17G8.09:intron:[2357697,2357762] - 65
7 retained intron: SPAC17G8.11c:intron:[2361931,2361980] - 49
1 retained intron: SPAC17G8.13c:intron:[2366127,2366174] - 47
11 retained intron: SPAC17G8.13c:intron:[2366264,2366380] - 116
2 retained intron: SPAC17G8.14c:intron:[2367496,2367541] - 45
6 retained intron: SPAC17G8.14c:intron:[2367725,2367766] - 41
9 retained intron: SPAC17G8.14c:intron:[2367955,2367999] - 44
1 retained intron: SPAC17G8.15:intron:[2348088,2348208] - 120
60 retained intron: SPAC17H9.06c:intron:[2014286,2014326] - 40
8 retained intron: SPAC17H9.06c:intron:[2014551,2014598] - 47
7 retained intron: SPAC17H9.06c:intron:[2015095,2015135] - 40
11 retained intron: SPAC17H9.07:intron:[2016456,2016508] - 52
12 retained intron: SPAC17H9.07:intron:[2017259,2017319] - 60
106 retained intron: SPAC17H9.09c:intron:[2020411,2020482] - 71
1 retained intron: SPAC17H9.13c:intron:[2028198,2028274] - 76
2 retained intron: SPAC17H9.13c:intron:[2028573,2028697] - 124
14 retained intron: SPAC17H9.16:intron:[2031605,2031666] - 61
1 retained intron: SPAC17H9.17c:intron:[2032629,2032687] - 58
9 retained intron: SPAC17H9.17c:intron:[2033082,2033131] - 49
5 retained intron: SPAC17H9.20:intron:[2036667,2036712] - 45
1 retained intron: SPAC17H9.20:intron:[2036825,2036863] - 38
1 retained intron: SPAC17H9.20:intron:[2039067,2039115] - 48
3 retained intron: SPAC1805.01c:intron:[2770895,2770935] - 40
4 retained intron: SPAC1805.01c:intron:[2773012,2773107] - 95
2 retained intron: SPAC1805.01c:intron:[2773156,2773203] - 47
1 retained intron: SPAC1805.02c:intron:[2774745,2774817] - 72
1 retained intron: SPAC1805.03c:intron:[2776083,2776134] - 51
2 retained intron: SPAC1805.03c:intron:[2776171,2776250] - 79
3 retained intron: SPAC1805.05:intron:[2781550,2781616] - 66
2 retained intron: SPAC1805.05:intron:[2781686,2781746] - 60
7 retained intron: SPAC1805.05:intron:[2781895,2781968] - 73
2 retained intron: SPAC1805.07c:intron:[2785684,2786012] - 328
1 retained intron: SPAC1805.08:intron:[2788078,2788127] - 49
7 retained intron: SPAC1805.08:intron:[2788238,2788298] - 60
1 retained intron: SPAC1805.13:intron:[2795045,2795289] - 244
1 retained intron: SPAC1805.15c:intron:[2798122,2798163] - 41
7 retained intron: SPAC1805.15c:intron:[2799766,2799861] - 95
30 retained intron: SPAC1834.06c:intron:[4705224,4705309] - 85
3 retained intron: SPAC1834.06c:intron:[4705762,4705817] - 55
20 retained intron: SPAC1834.07:intron:[4707460,4707505] - 45
1 retained intron: SPAC1834.07:intron:[4707659,4707732] - 73
3 retained intron: SPAC1834.10c:intron:[4718027,4718088] - 61
1 retained intron: SPAC1851.02:intron:[4500959,4501022] - 63
1 retained intron: SPAC1851.03:intron:[4502430,4502509] - 79
42 retained intron: SPAC1851.03:intron:[4502789,4502994] - 205
2 retained intron: SPAC1851.03:intron:[4504191,4504252] - 61
291 retained intron: SPAC18B11.03c:intron:[312212,312273] - 61
1 retained intron: SPAC18B11.04:intron:[310790,310836] - 46
17 retained intron: SPAC18B11.04:intron:[311180,311298] - 118
37 retained intron: SPAC18B11.04:intron:[311331,311370] - 39
35 retained intron: SPAC18B11.05:intron:[309719,309750] - 31
3 retained intron: SPAC18B11.05:intron:[309839,309888] - 49
4 retained intron: SPAC18B11.07c:intron:[305764,305811] - 47
16 retained intron: SPAC18B11.07c:intron:[305876,306089] - 213
13 retained intron: SPAC18B11.07c:intron:[306210,306315] - 105
55 retained intron: SPAC18B11.07c:intron:[306419,306467] - 48
56 retained intron: SPAC18B11.08c:intron:[304535,304673] - 138
3 retained intron: SPAC18B11.08c:intron:[304731,304770] - 39
4 retained intron: SPAC18B11.08c:intron:[304860,304918] - 58
1 retained intron: SPAC18B11.08c:intron:[304955,304999] - 44
1 retained intron: SPAC18B11.09c:intron:[303231,303333] - 102
88 retained intron: SPAC18B11.09c:intron:[303640,303715] - 75
4 retained intron: SPAC18B11.09c:intron:[303793,303851] - 58
33 retained intron: SPAC18G6.03:intron:[2215735,2215791] - 56
85 retained intron: SPAC18G6.03:intron:[2216241,2216485] - 244
14 retained intron: SPAC18G6.03:intron:[2216566,2216620] - 54
3 retained intron: SPAC18G6.04c:intron:[2218569,2218715] - 146
1 retained intron: SPAC18G6.11c:intron:[2238904,2239047] - 143
1 retained intron: SPAC18G6.15:intron:[2243677,2243737] - 60
1 retained intron: SPAC1952.01:intron:[4968537,4968764] - 227
1 retained intron: SPAC1952.02:intron:[4970005,4970086] - 81
10 retained intron: SPAC1952.02:intron:[4970179,4970243] - 64
5 retained intron: SPAC1952.03:intron:[4971548,4971594] - 46
1 retained intron: SPAC1952.04c:intron:[4972662,4972851] - 189
24 retained intron: SPAC1952.04c:intron:[4972922,4973016] - 94
10 retained intron: SPAC1952.04c:intron:[4973030,4973243] - 213
8 retained intron: SPAC1952.07:intron:[4978754,4978880] - 126
12 retained intron: SPAC1952.08c:intron:[4980486,4980561] - 75
1 retained intron: SPAC1952.10c:intron:[4985906,4986021] - 115
1 retained intron: SPAC1952.13:intron:[4991205,4991275] - 70
5 retained intron: SPAC1952.14c:intron:[4993934,4994045] - 111
1 retained intron: SPAC1952.16:intron:[4997719,4997774] - 55
8 retained intron: SPAC1952.16:intron:[4997935,4997987] - 52
5 retained intron: SPAC1952.16:intron:[4998734,4998776] - 42
4 retained intron: SPAC1952.16:intron:[4999154,4999206] - 52
18 retained intron: SPAC1952.16:intron:[4999233,4999273] - 40
2 retained intron: SPAC1952.16:intron:[4999672,4999707] - 35
1 retained intron: SPAC1952.17c:intron:[5000272,5000324] - 52
1 retained intron: SPAC1952.17c:intron:[5000891,5000932] - 41
9 retained intron: SPAC19A8.04:intron:[2481645,2481977] - 332
1 retained intron: SPAC19A8.09:intron:[2468000,2468042] - 42
9 retained intron: SPAC19A8.09:intron:[2468144,2468194] - 50
10 retained intron: SPAC19A8.09:intron:[2468254,2468291] - 37
2 retained intron: SPAC19A8.11c:intron:[2465405,2465445] - 40
21 retained intron: SPAC19A8.11c:intron:[2465835,2465877] - 42
5 retained intron: SPAC19A8.11c:intron:[2466069,2466112] - 43
1 retained intron: SPAC19A8.16:intron:[2472749,2472860] - 111
1 retained intron: SPAC19B12.04:intron:[4890373,4890425] - 52
1 retained intron: SPAC19B12.05c:intron:[4891292,4891364] - 72
2 retained intron: SPAC19B12.05c:intron:[4891669,4891713] - 44
11 retained intron: SPAC19B12.05c:intron:[4892892,4892965] - 73
1 retained intron: SPAC19B12.05c:intron:[4893050,4893097] - 47
11 retained intron: SPAC19B12.05c:intron:[4893184,4893239] - 55
13 retained intron: SPAC19B12.06c:intron:[4894405,4894448] - 43
9 retained intron: SPAC19B12.06c:intron:[4894514,4894619] - 105
2 retained intron: SPAC19B12.06c:intron:[4894836,4894886] - 50
22 retained intron: SPAC19B12.07c:intron:[4896084,4896124] - 40
8 retained intron: SPAC19B12.07c:intron:[4896340,4896409] - 69
9 retained intron: SPAC19B12.08:intron:[4898565,4898748] - 183
1 retained intron: SPAC19B12.09:intron:[4900585,4900633] - 48
1 retained intron: SPAC19B12.09:intron:[4900712,4900756] - 44
3 retained intron: SPAC19B12.10:intron:[4902001,4902132] - 131
18 retained intron: SPAC19B12.10:intron:[4903001,4903045] - 44
5 retained intron: SPAC19B12.11c:intron:[4904040,4904099] - 59
1 retained intron: SPAC19B12.12c:intron:[4906122,4906227] - 105
4 retained intron: SPAC19D5.03:intron:[5206956,5207060] - 104
1 retained intron: SPAC19D5.03:intron:[5207201,5207302] - 101
1 retained intron: SPAC19D5.05c:intron:[5218922,5218961] - 39
2 retained intron: SPAC19D5.05c:intron:[5219470,5219516] - 46
1 retained intron: SPAC19E9.01c:intron:[1353236,1353423] - 187
1 retained intron: SPAC19E9.02:intron:[1354419,1354687] - 268
1 retained intron: SPAC19E9.02:intron:[1354711,1354757] - 46
1 retained intron: SPAC19G12.01c:intron:[4043554,4043599] - 45
9 retained intron: SPAC19G12.01c:intron:[4043657,4043748] - 91
1 retained intron: SPAC19G12.02c:intron:[4045135,4045176] - 41
5 retained intron: SPAC19G12.02c:intron:[4046433,4046504] - 71
3 retained intron: SPAC19G12.02c:intron:[4046970,4047072] - 102
10 retained intron: SPAC19G12.02c:intron:[4047963,4048012] - 49
1 retained intron: SPAC19G12.03:intron:[4047933,4047979] - 46
1 retained intron: SPAC19G12.07c:intron:[4054068,4054109] - 41
4 retained intron: SPAC19G12.07c:intron:[4054184,4054233] - 49
3 retained intron: SPAC19G12.08:intron:[4057015,4057303] - 288
1 retained intron: SPAC19G12.13c:intron:[4070172,4070266] - 94
5 retained intron: SPAC19G12.13c:intron:[4070613,4070650] - 37
5 retained intron: SPAC19G12.14:intron:[4074126,4074179] - 53
8 retained intron: SPAC19G12.14:intron:[4074291,4074387] - 96
1 retained intron: SPAC19G12.17:intron:[4066328,4066386] - 58
5 retained intron: SPAC19G12.17:intron:[4066491,4066622] - 131
18 retained intron: SPAC19G12.17:intron:[4066652,4066727] - 75
4 retained intron: SPAC19G12.17:intron:[4066785,4066836] - 51
4 retained intron: SPAC19G12.17:intron:[4066858,4066942] - 84
27 retained intron: SPAC1A6.05c:intron:[1080606,1080658] - 52
1 retained intron: SPAC1A6.05c:intron:[1081433,1081470] - 37
16 retained intron: SPAC1A6.06c:intron:[1083142,1083193] - 51
1 retained intron: SPAC1A6.09c:intron:[1089044,1089306] - 262
1 retained intron: SPAC1B1.01:intron:[3537788,3537984] - 196
1 retained intron: SPAC1B1.04c:intron:[3544801,3544848] - 47
11 retained intron: SPAC1B1.04c:intron:[3544920,3544970] - 50
5 retained intron: SPAC1B1.04c:intron:[3545250,3545314] - 64
1 retained intron: SPAC1B1.04c:intron:[3546701,3546739] - 38
2 retained intron: SPAC1B1.04c:intron:[3546914,3547051] - 137
1 retained intron: SPAC1B1.04c:intron:[3547152,3547266] - 114
6 retained intron: SPAC1B2.03c:intron:[2812368,2812411] - 43
4 retained intron: SPAC1B2.04:intron:[2814516,2814927] - 411
1 retained intron: SPAC1B2.05:intron:[2818037,2818077] - 40
1 retained intron: SPAC1B3.01c:intron:[4927003,4927095] - 92
2 retained intron: SPAC1B3.01c:intron:[4927598,4927819] - 221
27 retained intron: SPAC1B3.02c:intron:[4929100,4929248] - 148
10 retained intron: SPAC1B3.02c:intron:[4929319,4929362] - 43
11 retained intron: SPAC1B3.02c:intron:[4929409,4929450] - 41
2 retained intron: SPAC1B3.04c:intron:[4931351,4931502] - 151
2 retained intron: SPAC1B3.05:intron:[4934684,4934730] - 46
1 retained intron: SPAC1B3.11c:intron:[4949874,4949922] - 48
1 retained intron: SPAC1B3.12c:intron:[4950665,4950728] - 63
2 retained intron: SPAC1B3.12c:intron:[4950882,4951198] - 316
20 retained intron: SPAC1B3.14:intron:[4954650,4954695] - 45
72 retained intron: SPAC1B3.14:intron:[4954701,4954747] - 46
11 retained intron: SPAC1B3.14:intron:[4954879,4955067] - 188
3 retained intron: SPAC1B3.14:intron:[4955392,4955437] - 45
2 retained intron: SPAC1B3.20:intron:[4948758,4948802] - 44
1 retained intron: SPAC1B9.02c:intron:[2402493,2402543] - 50
2 retained intron: SPAC1B9.03c:intron:[2406687,2406745] - 58
4 retained intron: SPAC1B9.03c:intron:[2406805,2406865] - 60
2 retained intron: SPAC1D4.02c:intron:[640947,640996] - 49
6 retained intron: SPAC1D4.02c:intron:[641184,641280] - 96
12 retained intron: SPAC1D4.02c:intron:[641401,641447] - 46
7 retained intron: SPAC1D4.03c:intron:[642131,642217] - 86
1 retained intron: SPAC1D4.04:intron:[644713,644749] - 36
9 retained intron: SPAC1D4.05c:intron:[647677,647729] - 52
1 retained intron: SPAC1D4.06c:intron:[648501,648613] - 112
11 retained intron: SPAC1D4.08:intron:[650545,651192] - 647
1 retained intron: SPAC1D4.09c:intron:[652529,652575] - 46
2 retained intron: SPAC1D4.09c:intron:[652698,652762] - 64
4 retained intron: SPAC1D4.09c:intron:[653178,653221] - 43
13 retained intron: SPAC1D4.14:intron:[670427,670482] - 55
1 retained intron: SPAC1F12.06c:intron:[3814940,3815026] - 86
1 retained intron: SPAC1F12.08:intron:[3817803,3817850] - 47
7 retained intron: SPAC1F12.08:intron:[3817991,3818034] - 43
6 retained intron: SPAC1F12.08:intron:[3818130,3818169] - 39
2 retained intron: SPAC1F12.09:intron:[3818907,3818953] - 46
14 retained intron: SPAC1F12.09:intron:[3819677,3819719] - 42
7 retained intron: SPAC1F12.10c:intron:[3820794,3820855] - 61
4 retained intron: SPAC1F12.10c:intron:[3821033,3821187] - 154
4 retained intron: SPAC1F3.03:intron:[620376,620419] - 43
1 retained intron: SPAC1F3.05:intron:[623305,623374] - 69
7 retained intron: SPAC1F3.05:intron:[623462,623517] - 55
3 retained intron: SPAC1F3.05:intron:[623593,623751] - 158
3 retained intron: SPAC1F3.09:intron:[634971,635068] - 97
5 retained intron: SPAC1F3.09:intron:[635235,635348] - 113
1 retained intron: SPAC1F3.09:intron:[636176,636233] - 57
195 retained intron: SPAC1F3.09:intron:[636314,636384] - 70
2 retained intron: SPAC1F5.03c:intron:[289985,290186] - 201
1 retained intron: SPAC1F5.10:intron:[272190,272256] - 66
14 retained intron: SPAC1F7.04:intron:[4224250,4224581] - 331
1 retained intron: SPAC1F8.07c:intron:[101869,101871] - 2
4 retained intron: SPAC20G4.01:intron:[4812222,4812301] - 79
11 retained intron: SPAC20G4.01:intron:[4812421,4812466] - 45
8 retained intron: SPAC20G4.04c:intron:[4821594,4821651] - 57
1 retained intron: SPAC20G4.04c:intron:[4822246,4822300] - 54
38 retained intron: SPAC20G4.04c:intron:[4822313,4822378] - 65
4 retained intron: SPAC20G4.06c:intron:[4825754,4825917] - 163
16 retained intron: SPAC20G4.06c:intron:[4826023,4826074] - 51
50 retained intron: SPAC20G4.08:intron:[4831968,4832010] - 42
3 retained intron: SPAC20G8.01:intron:[1388026,1388066] - 40
2 retained intron: SPAC20G8.01:intron:[1388574,1388636] - 62
1 retained intron: SPAC20G8.08c:intron:[1412792,1412835] - 43
1 retained intron: SPAC20G8.08c:intron:[1413237,1413275] - 38
1 retained intron: SPAC20G8.09c:intron:[1418654,1418693] - 39
2 retained intron: SPAC20H4.03c:intron:[2115200,2115249] - 49
11 retained intron: SPAC20H4.03c:intron:[2115274,2115337] - 63
4 retained intron: SPAC20H4.03c:intron:[2116017,2116192] - 175
69 retained intron: SPAC20H4.03c:intron:[2116255,2116312] - 57
3 retained intron: SPAC20H4.04:intron:[2120107,2120155] - 48
1 retained intron: SPAC20H4.05c:intron:[2119570,2119613] - 43
2 retained intron: SPAC20H4.05c:intron:[2119789,2119837] - 48
5 retained intron: SPAC20H4.05c:intron:[2119915,2119974] - 59
1 retained intron: SPAC20H4.05c:intron:[2120052,2120095] - 43
15 retained intron: SPAC20H4.05c:intron:[2120119,2120162] - 43
9 retained intron: SPAC20H4.07:intron:[2123356,2123451] - 95
1 retained intron: SPAC20H4.09:intron:[2126157,2126200] - 43
2 retained intron: SPAC20H4.09:intron:[2126278,2126326] - 48
11 retained intron: SPAC20H4.09:intron:[2126391,2126439] - 48
5 retained intron: SPAC20H4.09:intron:[2126696,2126732] - 36
23 retained intron: SPAC20H4.09:intron:[2127504,2127550] - 46
5 retained intron: SPAC20H4.09:intron:[2127652,2127700] - 48
3 retained intron: SPAC20H4.09:intron:[2127869,2127911] - 42
9 retained intron: SPAC20H4.09:intron:[2128232,2128270] - 38
11 retained intron: SPAC20H4.10:intron:[2128480,2128522] - 42
1 retained intron: SPAC20H4.10:intron:[2131509,2131549] - 40
1 retained intron: SPAC20H4.11c:intron:[2132426,2132544] - 118
1 retained intron: SPAC212.04c:intron:[22076,22131] - 55
1 retained intron: SPAC21E11.07:intron:[4260295,4260350] - 55
1 retained intron: SPAC222.03c:intron:[948132,948480] - 348
1 retained intron: SPAC222.07c:intron:[955585,955649] - 64
8 retained intron: SPAC222.07c:intron:[956272,956359] - 87
1 retained intron: SPAC222.13c:intron:[971404,971446] - 42
5 retained intron: SPAC222.14c:intron:[976463,976576] - 113
1 retained intron: SPAC222.15:intron:[977757,977803] - 46
7 retained intron: SPAC222.15:intron:[977857,977904] - 47
5 retained intron: SPAC222.15:intron:[978006,978048] - 42
13 retained intron: SPAC222.15:intron:[978189,978332] - 143
14 retained intron: SPAC222.16c:intron:[980026,980092] - 66
17 retained intron: SPAC222.16c:intron:[980239,980288] - 49
3 retained intron: SPAC222.16c:intron:[980378,980433] - 55
4 retained intron: SPAC222.16c:intron:[980532,980627] - 95
6 retained intron: SPAC222.16c:intron:[980774,980845] - 71
2 retained intron: SPAC222.16c:intron:[980898,980943] - 45
9 retained intron: SPAC222.18:intron:[979021,979119] - 98
50 retained intron: SPAC222.18:intron:[979176,979214] - 38
1 retained intron: SPAC222.19:intron:[949680,949728] - 48
1 retained intron: SPAC227.07c:intron:[508159,508202] - 43
9 retained intron: SPAC227.07c:intron:[509485,509562] - 77
5 retained intron: SPAC227.07c:intron:[509603,509647] - 44
1 retained intron: SPAC227.08c:intron:[510720,510779] - 59
3 retained intron: SPAC227.08c:intron:[511070,511166] - 96
4 retained intron: SPAC227.10:intron:[513858,513907] - 49
25 retained intron: SPAC227.10:intron:[513998,514045] - 47
8 retained intron: SPAC227.10:intron:[514169,514243] - 74
3 retained intron: SPAC227.11c:intron:[515082,515221] - 139
11 retained intron: SPAC227.11c:intron:[515482,515533] - 51
10 retained intron: SPAC227.12:intron:[515833,515895] - 62
1 retained intron: SPAC227.14:intron:[520694,520799] - 105
35 retained intron: SPAC227.14:intron:[521133,521214] - 81
1 retained intron: SPAC227.16c:intron:[528064,528123] - 59
16 retained intron: SPAC227.16c:intron:[528460,528566] - 106
28 retained intron: SPAC227.16c:intron:[528625,528672] - 47
6 retained intron: SPAC22A12.08c:intron:[1171270,1171361] - 91
2 retained intron: SPAC22A12.08c:intron:[1171856,1171899] - 43
6 retained intron: SPAC22A12.08c:intron:[1171956,1171998] - 42
5 retained intron: SPAC22A12.09c:intron:[1172789,1172832] - 43
1 retained intron: SPAC22A12.09c:intron:[1173979,1174028] - 49
6 retained intron: SPAC22A12.10:intron:[1174707,1174757] - 50
1 retained intron: SPAC22A12.14c:intron:[1182122,1182166] - 44
2 retained intron: SPAC22A12.14c:intron:[1182217,1182272] - 55
9 retained intron: SPAC22A12.16:intron:[1186337,1186396] - 59
1 retained intron: SPAC22E12.02:intron:[5022491,5022725] - 234
1 retained intron: SPAC22E12.04:intron:[5024944,5024996] - 52
4 retained intron: SPAC22E12.04:intron:[5025123,5025278] - 155
1 retained intron: SPAC22E12.04:intron:[5026067,5026155] - 88
107 retained intron: SPAC22E12.05c:intron:[5027294,5027347] - 53
1 retained intron: SPAC22E12.08:intron:[5033603,5033655] - 52
1 retained intron: SPAC22E12.10c:intron:[5037446,5037491] - 45
1 retained intron: SPAC22E12.13c:intron:[5044231,5044478] - 247
1 retained intron: SPAC22E12.13c:intron:[5044617,5044667] - 50
18 retained intron: SPAC22E12.16c:intron:[5052186,5052235] - 49
1 retained intron: SPAC22E12.17c:intron:[5054373,5054435] - 62
1 retained intron: SPAC22E12.17c:intron:[5054554,5054607] - 53
3 retained intron: SPAC22E12.18:intron:[5055217,5055256] - 39
1 retained intron: SPAC22F3.03c:intron:[703967,704014] - 47
2 retained intron: SPAC22F3.03c:intron:[704113,704204] - 91
9 retained intron: SPAC22F3.03c:intron:[704280,704321] - 41
3 retained intron: SPAC22F3.03c:intron:[704536,704572] - 36
2 retained intron: SPAC22F3.03c:intron:[704763,704815] - 52
3 retained intron: SPAC22F3.03c:intron:[704889,704924] - 35
3 retained intron: SPAC22F3.03c:intron:[705056,705094] - 38
4 retained intron: SPAC22F3.03c:intron:[705158,705194] - 36
3 retained intron: SPAC22F3.03c:intron:[705293,705332] - 39
2 retained intron: SPAC22F3.03c:intron:[705490,705528] - 38
5 retained intron: SPAC22F3.03c:intron:[705601,705636] - 35
1 retained intron: SPAC22F3.03c:intron:[706252,706291] - 39
6 retained intron: SPAC22F3.03c:intron:[706361,706403] - 42
1 retained intron: SPAC22F3.03c:intron:[706652,706687] - 35
7 retained intron: SPAC22F3.04:intron:[698177,698222] - 45
2 retained intron: SPAC22F3.04:intron:[699104,699147] - 43
1 retained intron: SPAC22F3.05c:intron:[697355,697400] - 45
4 retained intron: SPAC22F3.05c:intron:[697455,697495] - 40
1 retained intron: SPAC22F3.05c:intron:[697568,697620] - 52
1 retained intron: SPAC22F3.05c:intron:[697766,697804] - 38
3 retained intron: SPAC22F3.05c:intron:[697885,697927] - 42
2 retained intron: SPAC22F3.05c:intron:[701453,701507] - 54
1 retained intron: SPAC22F3.07c:intron:[691656,691705] - 49
10 retained intron: SPAC22F3.07c:intron:[691803,691852] - 49
18 retained intron: SPAC22F3.10c:intron:[684093,684344] - 251
1 retained intron: SPAC22F3.11c:intron:[683034,683101] - 67
52 retained intron: SPAC22F3.15:intron:[692725,692848] - 123
5 retained intron: SPAC22F8.07c:intron:[4797376,4797423] - 47
3 retained intron: SPAC22F8.07c:intron:[4797575,4797620] - 45
9 retained intron: SPAC22F8.07c:intron:[4797953,4797991] - 38
24 retained intron: SPAC22F8.07c:intron:[4798103,4798142] - 39
4 retained intron: SPAC22F8.07c:intron:[4798230,4798275] - 45
30 retained intron: SPAC22F8.07c:intron:[4798442,4798489] - 47
11 retained intron: SPAC22F8.09:intron:[4803315,4803370] - 55
1 retained intron: SPAC22G7.02:intron:[728452,728493] - 41
21 retained intron: SPAC22G7.02:intron:[728619,728663] - 44
9 retained intron: SPAC22G7.02:intron:[730685,730725] - 40
13 retained intron: SPAC22G7.02:intron:[730963,731003] - 40
2 retained intron: SPAC22G7.02:intron:[731322,731368] - 46
4 retained intron: SPAC22G7.04:intron:[733040,733084] - 44
1 retained intron: SPAC22G7.04:intron:[733495,733535] - 40
1 retained intron: SPAC22G7.04:intron:[735457,735494] - 37
2 retained intron: SPAC22G7.09c:intron:[751800,751839] - 39
16 retained intron: SPAC22G7.09c:intron:[752131,752187] - 56
11 retained intron: SPAC22G7.09c:intron:[752296,752342] - 46
1 retained intron: SPAC22G7.09c:intron:[752429,752472] - 43
2 retained intron: SPAC22G7.09c:intron:[753079,753155] - 76
10 retained intron: SPAC22G7.10:intron:[753841,753886] - 45
11 retained intron: SPAC22G7.10:intron:[753939,753986] - 47
4 retained intron: SPAC22H10.02:intron:[2371809,2371876] - 67
1 retained intron: SPAC22H10.02:intron:[2371965,2372102] - 137
43 retained intron: SPAC22H10.03c:intron:[2373263,2373302] - 39
2 retained intron: SPAC22H10.03c:intron:[2373376,2373412] - 36
2 retained intron: SPAC22H10.03c:intron:[2376223,2376279] - 56
1 retained intron: SPAC22H10.04:intron:[2377515,2377581] - 66
7 retained intron: SPAC22H10.04:intron:[2377652,2377764] - 112
1 retained intron: SPAC22H10.05c:intron:[2380026,2380171] - 145
1 retained intron: SPAC22H10.07:intron:[2383180,2383233] - 53
1 retained intron: SPAC22H10.08:intron:[2387265,2387321] - 56
1 retained intron: SPAC22H10.10:intron:[2390240,2390278] - 38
5 retained intron: SPAC22H10.10:intron:[2390547,2390589] - 42
4 retained intron: SPAC22H10.10:intron:[2390689,2390735] - 46
33 retained intron: SPAC22H10.10:intron:[2391011,2391054] - 43
1 retained intron: SPAC22H10.12c:intron:[2396615,2396700] - 85
1 retained intron: SPAC22H12.02:intron:[895407,895596] - 189
37 retained intron: SPAC22H12.02:intron:[895765,895822] - 57
6 retained intron: SPAC22H12.02:intron:[895974,896038] - 64
2 retained intron: SPAC22H12.03:intron:[897163,897241] - 78
1 retained intron: SPAC22H12.03:intron:[897781,897828] - 47
68 retained intron: SPAC23A1.03:intron:[4083769,4083947] - 178
1 retained intron: SPAC23A1.06c:intron:[4091756,4091821] - 65
2 retained intron: SPAC23A1.06c:intron:[4092024,4092064] - 40
10 retained intron: SPAC23A1.11:intron:[4097374,4097429] - 55
1 retained intron: SPAC23A1.12c:intron:[4100014,4100065] - 51
1 retained intron: SPAC23A1.19c:intron:[4113933,4114108] - 175
1 retained intron: SPAC23A1.20:intron:[4101269,4101271] - 2
1 retained intron: SPAC23C11.01:intron:[2134096,2134149] - 53
2 retained intron: SPAC23C11.01:intron:[2134335,2134375] - 40
12 retained intron: SPAC23C11.01:intron:[2134488,2134573] - 85
10 retained intron: SPAC23C11.04c:intron:[2138210,2138266] - 56
1 retained intron: SPAC23C11.04c:intron:[2138409,2138448] - 39
3 retained intron: SPAC23C11.08:intron:[2145779,2145926] - 147
14 retained intron: SPAC23C11.08:intron:[2145987,2146042] - 55
9 retained intron: SPAC23C11.08:intron:[2146170,2146325] - 155
3 retained intron: SPAC23C11.10:intron:[2150744,2150783] - 39
14 retained intron: SPAC23C11.10:intron:[2150882,2150929] - 47
7 retained intron: SPAC23C11.10:intron:[2151128,2151179] - 51
13 retained intron: SPAC23C11.10:intron:[2151342,2151385] - 43
2 retained intron: SPAC23C11.11:intron:[2152199,2152259] - 60
56 retained intron: SPAC23C11.11:intron:[2153011,2153072] - 61
2 retained intron: SPAC23C11.11:intron:[2153374,2153467] - 93
4 retained intron: SPAC23C11.13c:intron:[2156048,2156322] - 274
1 retained intron: SPAC23C11.15:intron:[2160829,2160907] - 78
1 retained intron: SPAC23C11.17:intron:[2167245,2167301] - 56
1 retained intron: SPAC23C4.02:intron:[1032310,1032358] - 48
2 retained intron: SPAC23C4.02:intron:[1032716,1032765] - 49
1 retained intron: SPAC23C4.04c:intron:[1036343,1036396] - 53
3 retained intron: SPAC23C4.05c:intron:[1038061,1038115] - 54
1 retained intron: SPAC23C4.08:intron:[1041598,1041672] - 74
6 retained intron: SPAC23C4.08:intron:[1041745,1042069] - 324
9 retained intron: SPAC23C4.09c:intron:[1043264,1043381] - 117
3 retained intron: SPAC23C4.09c:intron:[1043512,1043595] - 83
9 retained intron: SPAC23C4.09c:intron:[1043671,1043719] - 48
13 retained intron: SPAC23C4.09c:intron:[1043789,1044000] - 211
5 retained intron: SPAC23C4.11:intron:[1047385,1047434] - 49
1 retained intron: SPAC23C4.11:intron:[1047485,1047529] - 44
7 retained intron: SPAC23C4.12:intron:[1049198,1049364] - 166
31 retained intron: SPAC23C4.12:intron:[1050088,1050174] - 86
4 retained intron: SPAC23C4.13:intron:[1051739,1051782] - 43
15 retained intron: SPAC23C4.13:intron:[1051921,1051970] - 49
8 retained intron: SPAC23C4.14:intron:[1053167,1053243] - 76
13 retained intron: SPAC23C4.14:intron:[1053676,1053719] - 43
17 retained intron: SPAC23C4.14:intron:[1054254,1054345] - 91
5 retained intron: SPAC23C4.15:intron:[1054809,1054873] - 64
6 retained intron: SPAC23C4.15:intron:[1054956,1055167] - 211
3 retained intron: SPAC23C4.17:intron:[1058415,1058464] - 49
1 retained intron: SPAC23C4.17:intron:[1058514,1058622] - 108
1 retained intron: SPAC23C4.17:intron:[1060670,1060708] - 38
4 retained intron: SPAC23D3.02:intron:[4338815,4338867] - 52
1 retained intron: SPAC23D3.07:intron:[4351067,4351132] - 65
22 retained intron: SPAC23D3.07:intron:[4351278,4351326] - 48
2 retained intron: SPAC23D3.08:intron:[4353359,4353409] - 50
1 retained intron: SPAC23D3.09:intron:[4355096,4355172] - 76
1 retained intron: SPAC23D3.14c:intron:[4373326,4373370] - 44
2 retained intron: SPAC23D3.14c:intron:[4374258,4374376] - 118
106 retained intron: SPAC23D3.14c:intron:[4374691,4374732] - 41
36 retained intron: SPAC23D3.16:intron:[4365734,4365788] - 54
1 retained intron: SPAC23D3.16:intron:[4365844,4366008] - 164
11 retained intron: SPAC23D3.17:intron:[4366563,4366610] - 47
12 retained intron: SPAC23D3.17:intron:[4366693,4366769] - 76
4 retained intron: SPAC23G3.03:intron:[870880,870952] - 72
1 retained intron: SPAC23G3.06:intron:[877106,877174] - 68
1 retained intron: SPAC23G3.11:intron:[887836,887898] - 62
7 retained intron: SPAC23G3.11:intron:[887981,888026] - 45
3 retained intron: SPAC23H3.02c:intron:[2494856,2494895] - 39
36 retained intron: SPAC23H3.02c:intron:[2495142,2495213] - 71
40 retained intron: SPAC23H3.02c:intron:[2495267,2495308] - 41
17 retained intron: SPAC23H3.03c:intron:[2496697,2496738] - 41
1 retained intron: SPAC23H3.03c:intron:[2496875,2496918] - 43
3 retained intron: SPAC23H3.04:intron:[2499159,2499160] - 1
159 retained intron: SPAC23H3.04:intron:[2499824,2499874] - 50
3 retained intron: SPAC23H3.07c:intron:[2505452,2505493] - 41
7 retained intron: SPAC23H3.07c:intron:[2505540,2505589] - 49
15 retained intron: SPAC23H3.08c:intron:[2506939,2506984] - 45
1 retained intron: SPAC23H3.14:intron:[2521917,2522033] - 116
2 retained intron: SPAC23H4.02:intron:[1606803,1606974] - 171
1 retained intron: SPAC23H4.03c:intron:[1604396,1604529] - 133
1 retained intron: SPAC23H4.04:intron:[1602593,1602680] - 87
21 retained intron: SPAC23H4.04:intron:[1602742,1602786] - 44
1 retained intron: SPAC23H4.07c:intron:[1595362,1595410] - 48
1 retained intron: SPAC23H4.08:intron:[1593780,1593869] - 89
6 retained intron: SPAC23H4.08:intron:[1594182,1594271] - 89
26 retained intron: SPAC23H4.08:intron:[1594340,1594393] - 53
11 retained intron: SPAC23H4.11c:intron:[1589391,1589462] - 71
2 retained intron: SPAC23H4.13c:intron:[1586863,1586943] - 80
1 retained intron: SPAC23H4.14:intron:[1582597,1582656] - 59
1 retained intron: SPAC23H4.14:intron:[1585045,1585091] - 46
4 retained intron: SPAC23H4.16c:intron:[1578445,1578491] - 46
40 retained intron: SPAC23H4.16c:intron:[1578656,1578792] - 136
1 retained intron: SPAC23H4.16c:intron:[1578984,1579042] - 58
2 retained intron: SPAC23H4.18c:intron:[1575484,1575672] - 188
16 retained intron: SPAC23H4.18c:intron:[1575822,1575885] - 63
13 retained intron: SPAC23H4.18c:intron:[1575976,1576020] - 44
2 retained intron: SPAC23H4.21:intron:[1586096,1586188] - 92
1 retained intron: SPAC24C9.02c:intron:[3039995,3040087] - 92
1 retained intron: SPAC24C9.06c:intron:[3050745,3051374] - 629
1 retained intron: SPAC24C9.08:intron:[3061315,3061374] - 59
1 retained intron: SPAC24C9.11:intron:[3066657,3066706] - 49
13 retained intron: SPAC24C9.11:intron:[3068734,3068781] - 47
1 retained intron: SPAC24C9.13c:intron:[3071750,3071803] - 53
1 retained intron: SPAC24C9.15c:intron:[3074719,3074771] - 52
1 retained intron: SPAC24C9.15c:intron:[3075353,3075428] - 75
113 retained intron: SPAC24C9.16c:intron:[3042817,3042871] - 54
2 retained intron: SPAC24C9.16c:intron:[3042909,3043095] - 186
2 retained intron: SPAC24H6.01c:intron:[490262,490337] - 75
1 retained intron: SPAC24H6.01c:intron:[490771,490811] - 40
15 retained intron: SPAC24H6.01c:intron:[490931,490978] - 47
1 retained intron: SPAC24H6.01c:intron:[491149,491185] - 36
9 retained intron: SPAC24H6.01c:intron:[491858,491904] - 46
6 retained intron: SPAC24H6.02c:intron:[489029,489073] - 44
1 retained intron: SPAC24H6.03:intron:[486131,486187] - 56
1 retained intron: SPAC24H6.03:intron:[486597,486648] - 51
2 retained intron: SPAC24H6.05:intron:[482185,482285] - 100
1 retained intron: SPAC24H6.06:intron:[478606,478654] - 48
1 retained intron: SPAC24H6.07:intron:[476053,476098] - 45
1 retained intron: SPAC24H6.09:intron:[472802,472857] - 55
1 retained intron: SPAC25B8.11:intron:[4175508,4175554] - 46
1 retained intron: SPAC25G10.03:intron:[4299958,4300021] - 63
1 retained intron: SPAC25G10.05c:intron:[4305569,4305728] - 159
1 retained intron: SPAC25G10.06:intron:[4306038,4306187] - 149
1 retained intron: SPAC25H1.10c:intron:[2532928,2532990] - 62
1 retained intron: SPAC25H1.10c:intron:[2533127,2533169] - 42
8 retained intron: SPAC26A3.02:intron:[3335587,3335686] - 99
3 retained intron: SPAC26A3.02:intron:[3335880,3335923] - 43
1 retained intron: SPAC26A3.06:intron:[3344819,3344870] - 51
4 retained intron: SPAC26A3.06:intron:[3344908,3345030] - 122
30 retained intron: SPAC26A3.08:intron:[3347055,3347120] - 65
1 retained intron: SPAC26A3.10:intron:[3352693,3352984] - 291
2 retained intron: SPAC26A3.11:intron:[3357079,3357128] - 49
2 retained intron: SPAC26A3.14c:intron:[3366872,3366931] - 59
5 retained intron: SPAC26A3.14c:intron:[3367020,3367053] - 33
33 retained intron: SPAC26F1.02:intron:[5182122,5182190] - 68
1 retained intron: SPAC26F1.12c:intron:[5154942,5154993] - 51
7 retained intron: SPAC26H5.02c:intron:[4118200,4118244] - 44
2 retained intron: SPAC26H5.02c:intron:[4118262,4118307] - 45
1 retained intron: SPAC26H5.02c:intron:[4118338,4118381] - 43
6 retained intron: SPAC26H5.03:intron:[4120030,4120125] - 95
13 retained intron: SPAC26H5.03:intron:[4120228,4120269] - 41
5 retained intron: SPAC26H5.03:intron:[4120512,4120577] - 65
4 retained intron: SPAC26H5.06:intron:[4129597,4129643] - 46
3 retained intron: SPAC26H5.06:intron:[4129764,4129836] - 72
2 retained intron: SPAC26H5.07c:intron:[4132923,4133226] - 303
4 retained intron: SPAC26H5.07c:intron:[4133299,4133376] - 77
12 retained intron: SPAC26H5.09c:intron:[4138718,4138979] - 261
1 retained intron: SPAC26H5.11:intron:[4146978,4147028] - 50
1 retained intron: SPAC26H5.13c:intron:[4152345,4152434] - 89
1 retained intron: SPAC27D7.07c:intron:[4520827,4520883] - 56
4 retained intron: SPAC27D7.07c:intron:[4520933,4520976] - 43
7 retained intron: SPAC27D7.08c:intron:[4521846,4521902] - 56
14 retained intron: SPAC27D7.08c:intron:[4521992,4522039] - 47
3 retained intron: SPAC27D7.08c:intron:[4522416,4522464] - 48
1 retained intron: SPAC27D7.08c:intron:[4522619,4522665] - 46
23 retained intron: SPAC27D7.08c:intron:[4522676,4522754] - 78
1 retained intron: SPAC27D7.08c:intron:[4522830,4522876] - 46
18 retained intron: SPAC27E2.01:intron:[4003416,4003466] - 50
1 retained intron: SPAC27E2.02:intron:[4005061,4005153] - 92
5 retained intron: SPAC27E2.03c:intron:[4007148,4007591] - 443
1 retained intron: SPAC27E2.05:intron:[4016190,4016239] - 49
1 retained intron: SPAC27E2.10c:intron:[4034516,4034577] - 61
2 retained intron: SPAC27E2.10c:intron:[4034949,4035090] - 141
1 retained intron: SPAC27E2.10c:intron:[4035429,4035478] - 49
9 retained intron: SPAC27E2.10c:intron:[4035543,4035708] - 165
14 retained intron: SPAC27E2.14:intron:[4012611,4012662] - 51
3 retained intron: SPAC27F1.02c:intron:[4320127,4320186] - 59
1 retained intron: SPAC27F1.09c:intron:[4336555,4336621] - 66
2 retained intron: SPAC29A4.02c:intron:[5144034,5144327] - 293
1 retained intron: SPAC29A4.03c:intron:[5142628,5142630] - 2
1 retained intron: SPAC29A4.06c:intron:[5136362,5136404] - 42
1 retained intron: SPAC29A4.08c:intron:[5133299,5133339] - 40
6 retained intron: SPAC29A4.08c:intron:[5133444,5133929] - 485
11 retained intron: SPAC29A4.09:intron:[5132641,5132688] - 47
1 retained intron: SPAC29A4.09:intron:[5132794,5132834] - 40
3 retained intron: SPAC29A4.14c:intron:[5119830,5119886] - 56
8 retained intron: SPAC29A4.14c:intron:[5120333,5120440] - 107
3 retained intron: SPAC29A4.17c:intron:[5113369,5113480] - 111
1 retained intron: SPAC29A4.18:intron:[5111536,5111613] - 77
4 retained intron: SPAC29A4.18:intron:[5111719,5111789] - 70
10 retained intron: SPAC29A4.19c:intron:[5107454,5107503] - 49
1 retained intron: SPAC29A4.19c:intron:[5110068,5110114] - 46
3 retained intron: SPAC29A4.20:intron:[5104605,5104700] - 95
1 retained intron: SPAC29E6.01:intron:[4402313,4402364] - 51
2 retained intron: SPAC29E6.02:intron:[4405435,4405518] - 83
3 retained intron: SPAC29E6.03c:intron:[4407375,4407446] - 71
14 retained intron: SPAC29E6.05c:intron:[4410633,4410688] - 55
1 retained intron: SPAC29E6.08:intron:[4415749,4416004] - 255
339 retained intron: SPAC29E6.08:intron:[4416065,4416117] - 52
44 retained intron: SPAC29E6.08:intron:[4416378,4416448] - 70
25 retained intron: SPAC2C4.03c:intron:[4264152,4264213] - 61
2 retained intron: SPAC2C4.03c:intron:[4264326,4264386] - 60
1 retained intron: SPAC2C4.03c:intron:[4264487,4264544] - 57
6 retained intron: SPAC2C4.05:intron:[4267233,4267320] - 87
1 retained intron: SPAC2C4.06c:intron:[4270674,4270735] - 61
2 retained intron: SPAC2C4.09:intron:[4276244,4276293] - 49
9 retained intron: SPAC2C4.09:intron:[4276680,4276743] - 63
4 retained intron: SPAC2C4.10c:intron:[4277317,4277369] - 52
8 retained intron: SPAC2C4.10c:intron:[4277582,4277651] - 69
15 retained intron: SPAC2C4.11c:intron:[4279405,4279456] - 51
1 retained intron: SPAC2F3.04c:intron:[3927884,3927968] - 84
1 retained intron: SPAC2F3.11:intron:[3946695,3946737] - 42
1 retained intron: SPAC2F3.12c:intron:[3948493,3948537] - 44
5 retained intron: SPAC2F3.12c:intron:[3948690,3948734] - 44
3 retained intron: SPAC2F3.15:intron:[3955555,3955621] - 66
10 retained intron: SPAC2F3.16:intron:[3957442,3957511] - 69
7 retained intron: SPAC2F3.16:intron:[3958004,3958066] - 62
2 retained intron: SPAC2F3.17c:intron:[3923721,3923771] - 50
19 retained intron: SPAC2F3.17c:intron:[3923885,3923994] - 109
2 retained intron: SPAC2F3.18c:intron:[3942364,3942505] - 141
27 retained intron: SPAC2F3.18c:intron:[3942669,3942774] - 105
14 retained intron: SPAC2F7.04:intron:[539322,539364] - 42
1 retained intron: SPAC2F7.15:intron:[564464,564552] - 88
1 retained intron: SPAC2F7.17:intron:[570647,570884] - 237
14 retained intron: SPAC2G11.03c:intron:[812139,812191] - 52
1 retained intron: SPAC2G11.03c:intron:[813472,813558] - 86
3 retained intron: SPAC2G11.03c:intron:[813766,813815] - 49
8 retained intron: SPAC2G11.06:intron:[818140,818206] - 66
14 retained intron: SPAC2G11.06:intron:[818318,818428] - 110
3 retained intron: SPAC2G11.06:intron:[818915,818974] - 59
9 retained intron: SPAC2G11.07c:intron:[821005,821044] - 39
2 retained intron: SPAC2G11.07c:intron:[821118,821376] - 258
16 retained intron: SPAC2G11.08c:intron:[822429,822488] - 59
1 retained intron: SPAC2G11.09:intron:[823784,823893] - 109
1 retained intron: SPAC2G11.10c:intron:[827678,827902] - 224
5 retained intron: SPAC2G11.11c:intron:[829312,829355] - 43
1 retained intron: SPAC2G11.11c:intron:[829424,829507] - 83
3 retained intron: SPAC2G11.14:intron:[838382,838424] - 42
3 retained intron: SPAC2G11.14:intron:[839192,839230] - 38
1 retained intron: SPAC2G11.15c:intron:[841859,841907] - 48
1 retained intron: SPAC2G11.15c:intron:[842053,842125] - 72
9 retained intron: SPAC2G11.15c:intron:[842241,842320] - 79
8 retained intron: SPAC2H10.02c:intron:[5276755,5276826] - 71
1 retained intron: SPAC30.02c:intron:[4393572,4393717] - 145
1 retained intron: SPAC30.03c:intron:[4394741,4394798] - 57
9 retained intron: SPAC30.03c:intron:[4394967,4395009] - 42
21 retained intron: SPAC30.03c:intron:[4395092,4395130] - 38
14 retained intron: SPAC30.03c:intron:[4395367,4395415] - 48
104 retained intron: SPAC30.03c:intron:[4395491,4395529] - 38
1 retained intron: SPAC30C2.05:intron:[4639924,4639968] - 44
24 retained intron: SPAC30C2.05:intron:[4640365,4640446] - 81
4 retained intron: SPAC30D11.02c:intron:[1119620,1119748] - 128
1 retained intron: SPAC30D11.03:intron:[1116202,1116246] - 44
1 retained intron: SPAC30D11.03:intron:[1116367,1116414] - 47
2 retained intron: SPAC30D11.06c:intron:[1108703,1108758] - 55
4 retained intron: SPAC30D11.06c:intron:[1108846,1109054] - 208
1 retained intron: SPAC30D11.08c:intron:[1106203,1106252] - 49
1 retained intron: SPAC30D11.09:intron:[1101979,1102022] - 43
3 retained intron: SPAC30D11.12:intron:[1096924,1097011] - 87
4 retained intron: SPAC30D11.12:intron:[1097198,1097247] - 49
2 retained intron: SPAC30D11.13:intron:[1094560,1094615] - 55
11 retained intron: SPAC30D11.13:intron:[1094854,1094896] - 42
16 retained intron: SPAC30D11.13:intron:[1095274,1095327] - 53
3 retained intron: SPAC31A2.02:intron:[388415,388451] - 36
7 retained intron: SPAC31A2.02:intron:[388621,388720] - 99
9 retained intron: SPAC31A2.03:intron:[389564,389616] - 52
1 retained intron: SPAC31A2.05c:intron:[391915,391955] - 40
2 retained intron: SPAC31A2.09c:intron:[405079,405137] - 58
2 retained intron: SPAC31A2.09c:intron:[405202,405240] - 38
4 retained intron: SPAC31A2.10:intron:[405924,405963] - 39
6 retained intron: SPAC31A2.10:intron:[406032,406133] - 101
3 retained intron: SPAC31A2.13c:intron:[414629,414683] - 54
1 retained intron: SPAC31A2.15c:intron:[418720,418758] - 38
14 retained intron: SPAC31A2.15c:intron:[419220,419267] - 47
5 retained intron: SPAC31A2.15c:intron:[419502,419601] - 99
7 retained intron: SPAC31G5.02:intron:[2991271,2991497] - 226
1 retained intron: SPAC31G5.05c:intron:[2995688,2995733] - 45
1 retained intron: SPAC31G5.06:intron:[2996403,2996453] - 50
1 retained intron: SPAC31G5.12c:intron:[3008795,3009159] - 364
10 retained intron: SPAC31G5.12c:intron:[3009258,3009311] - 53
16 retained intron: SPAC31G5.15:intron:[3014555,3014594] - 39
1 retained intron: SPAC31G5.15:intron:[3016560,3016600] - 40
4 retained intron: SPAC31G5.16c:intron:[3018073,3018198] - 125
1 retained intron: SPAC31G5.17c:intron:[3020010,3020229] - 219
1 retained intron: SPAC323.01c:intron:[3908550,3908599] - 49
1 retained intron: SPAC323.02c:intron:[3909568,3909631] - 63
10 retained intron: SPAC323.02c:intron:[3909734,3909872] - 138
10 retained intron: SPAC323.02c:intron:[3910314,3910352] - 38
36 retained intron: SPAC323.03c:intron:[3911784,3911827] - 43
6 retained intron: SPAC323.03c:intron:[3911964,3912016] - 52
2 retained intron: SPAC323.03c:intron:[3912500,3912542] - 42
2 retained intron: SPAC323.04:intron:[3912916,3913096] - 180
1 retained intron: SPAC323.04:intron:[3913481,3913543] - 62
1 retained intron: SPAC323.04:intron:[3914055,3914101] - 46
10 retained intron: SPAC323.05c:intron:[3914790,3914837] - 47
3 retained intron: SPAC323.05c:intron:[3915124,3915165] - 41
11 retained intron: SPAC323.05c:intron:[3915227,3915266] - 39
20 retained intron: SPAC323.05c:intron:[3915360,3915404] - 44
15 retained intron: SPAC323.06c:intron:[3915698,3915745] - 47
2 retained intron: SPAC323.06c:intron:[3915821,3915864] - 43
4 retained intron: SPAC323.06c:intron:[3916072,3916107] - 35
4 retained intron: SPAC323.06c:intron:[3916298,3916339] - 41
1 retained intron: SPAC323.06c:intron:[3916527,3916568] - 41
4 retained intron: SPAC323.06c:intron:[3916873,3916912] - 39
1 retained intron: SPAC323.06c:intron:[3917102,3917139] - 37
1 retained intron: SPAC323.06c:intron:[3917303,3917346] - 43
2 retained intron: SPAC323.06c:intron:[3917459,3917496] - 37
5 retained intron: SPAC328.05:intron:[3485342,3485381] - 39
10 retained intron: SPAC328.05:intron:[3485483,3485581] - 98
1 retained intron: SPAC328.06:intron:[3490684,3490768] - 84
1 retained intron: SPAC328.09:intron:[3494775,3495046] - 271
1 retained intron: SPAC328.10c:intron:[3496988,3497276] - 288
1 retained intron: SPAC32A11.01:intron:[2445412,2445472] - 60
11 retained intron: SPAC32A11.01:intron:[2445968,2446051] - 83
7 retained intron: SPAC32A11.04c:intron:[2444921,2445001] - 80
1 retained intron: SPAC343.01c:intron:[1640811,1640877] - 66
1 retained intron: SPAC343.03:intron:[1643126,1643169] - 43
5 retained intron: SPAC343.03:intron:[1643292,1643509] - 217
27 retained intron: SPAC343.07:intron:[1651141,1651184] - 43
5 retained intron: SPAC343.08c:intron:[1653306,1653355] - 49
2 retained intron: SPAC343.08c:intron:[1653606,1653723] - 117
2 retained intron: SPAC343.13:intron:[1670510,1670576] - 66
5 retained intron: SPAC343.14c:intron:[1672952,1672998] - 46
6 retained intron: SPAC343.14c:intron:[1673389,1673441] - 52
14 retained intron: SPAC343.17c:intron:[1679642,1679698] - 56
1 retained intron: SPAC343.18:intron:[1680435,1680488] - 53
1 retained intron: SPAC3A11.02:intron:[3469845,3469903] - 58
1 retained intron: SPAC3A11.03:intron:[3467475,3467607] - 132
3 retained intron: SPAC3A11.04:intron:[3464259,3464296] - 37
1 retained intron: SPAC3A11.04:intron:[3465444,3465541] - 97
4 retained intron: SPAC3A11.05c:intron:[3463127,3463258] - 131
4 retained intron: SPAC3A11.05c:intron:[3463698,3463744] - 46
2 retained intron: SPAC3A11.06:intron:[3459436,3459491] - 55
2 retained intron: SPAC3A11.06:intron:[3459665,3459704] - 39
2 retained intron: SPAC3A11.06:intron:[3459897,3459940] - 43
1 retained intron: SPAC3A11.06:intron:[3460185,3460233] - 48
12 retained intron: SPAC3A11.06:intron:[3460364,3460424] - 60
11 retained intron: SPAC3A11.06:intron:[3460560,3460641] - 81
1 retained intron: SPAC3A11.06:intron:[3461583,3461765] - 182
2 retained intron: SPAC3A11.09:intron:[3452269,3452484] - 215
1 retained intron: SPAC3A11.12c:intron:[3444096,3444281] - 185
1 retained intron: SPAC3A11.13:intron:[3441795,3441923] - 128
18 retained intron: SPAC3A11.13:intron:[3442048,3442126] - 78
12 retained intron: SPAC3A11.13:intron:[3442197,3442247] - 50
12 retained intron: SPAC3A11.14c:intron:[3438944,3438986] - 42
1 retained intron: SPAC3A12.02:intron:[1422071,1422179] - 108
34 retained intron: SPAC3A12.02:intron:[1422552,1422610] - 58
2 retained intron: SPAC3A12.04c:intron:[1425161,1425230] - 69
2 retained intron: SPAC3A12.04c:intron:[1425329,1425371] - 42
9 retained intron: SPAC3A12.05c:intron:[1427148,1427188] - 40
1 retained intron: SPAC3A12.05c:intron:[1429830,1429881] - 51
1 retained intron: SPAC3A12.07:intron:[1434002,1434047] - 45
9 retained intron: SPAC3A12.07:intron:[1434137,1434183] - 46
3 retained intron: SPAC3A12.11c:intron:[1440057,1440111] - 54
3 retained intron: SPAC3A12.11c:intron:[1440276,1440325] - 49
7 retained intron: SPAC3A12.13c:intron:[1443072,1443115] - 43
1 retained intron: SPAC3A12.14:intron:[1444932,1445058] - 126
1 retained intron: SPAC3A12.16c:intron:[1451004,1451078] - 74
1 retained intron: SPAC3A12.18:intron:[1454927,1455043] - 116
1 retained intron: SPAC3C7.03c:intron:[2067704,2067748] - 44
1 retained intron: SPAC3C7.07c:intron:[2077384,2077423] - 39
3 retained intron: SPAC3C7.07c:intron:[2077684,2077725] - 41
30 retained intron: SPAC3C7.07c:intron:[2077796,2077842] - 46
13 retained intron: SPAC3C7.07c:intron:[2078366,2078420] - 54
2 retained intron: SPAC3C7.07c:intron:[2078486,2078527] - 41
7 retained intron: SPAC3C7.11c:intron:[2088473,2088526] - 53
1 retained intron: SPAC3F10.06c:intron:[2828349,2828628] - 279
1 retained intron: SPAC3F10.09:intron:[2833036,2833098] - 62
11 retained intron: SPAC3F10.09:intron:[2833169,2833425] - 256
13 retained intron: SPAC3F10.09:intron:[2833529,2833595] - 66
1 retained intron: SPAC3F10.17:intron:[2852038,2852174] - 136
1 retained intron: SPAC3F10.19:intron:[2830599,2830798] - 199
9 retained intron: SPAC3F10.19:intron:[2830806,2830991] - 185
112 retained intron: SPAC3G6.01:intron:[5378618,5378675] - 57
1 retained intron: SPAC3G6.02:intron:[5383123,5383229] - 106
6 retained intron: SPAC3G6.02:intron:[5383271,5383311] - 40
19 retained intron: SPAC3G6.03c:intron:[5384083,5384206] - 123
1 retained intron: SPAC3G6.03c:intron:[5384530,5384629] - 99
14 retained intron: SPAC3G6.03c:intron:[5384758,5385009] - 251
11 retained intron: SPAC3G6.05:intron:[5388963,5389019] - 56
5 retained intron: SPAC3G6.05:intron:[5389091,5389155] - 64
7 retained intron: SPAC3G6.05:intron:[5389253,5389322] - 69
2 retained intron: SPAC3G6.06c:intron:[5390707,5391088] - 381
7 retained intron: SPAC3G6.06c:intron:[5391179,5391248] - 69
1 retained intron: SPAC3G9.03:intron:[3179709,3179820] - 111
1 retained intron: SPAC3G9.04:intron:[3176998,3177047] - 49
1 retained intron: SPAC3G9.06:intron:[3172857,3173051] - 194
10 retained intron: SPAC3G9.09c:intron:[3166525,3166587] - 62
10 retained intron: SPAC3G9.09c:intron:[3166758,3166864] - 106
1 retained intron: SPAC3G9.10c:intron:[3163223,3163271] - 48
1 retained intron: SPAC3G9.10c:intron:[3163311,3163422] - 111
12 retained intron: SPAC3G9.13c:intron:[3151625,3151788] - 163
5 retained intron: SPAC3G9.13c:intron:[3151869,3151951] - 82
18 retained intron: SPAC3G9.13c:intron:[3152079,3152133] - 54
8 retained intron: SPAC3G9.17:intron:[3162443,3162522] - 79
41 retained intron: SPAC3G9.17:intron:[3162611,3162669] - 58
2 retained intron: SPAC3H1.01c:intron:[1931084,1931128] - 44
1 retained intron: SPAC3H1.04c:intron:[1936234,1936335] - 101
1 retained intron: SPAC3H1.05:intron:[1939004,1939074] - 70
1 retained intron: SPAC3H1.08c:intron:[1945852,1945892] - 40
1 retained intron: SPAC3H1.09c:intron:[1947011,1947059] - 48
7 retained intron: SPAC3H1.09c:intron:[1947754,1947794] - 40
2 retained intron: SPAC3H1.13:intron:[1965294,1965333] - 39
35 retained intron: SPAC3H1.13:intron:[1965803,1965844] - 41
2 retained intron: SPAC3H1.13:intron:[1966050,1966101] - 51
6 retained intron: SPAC3H5.07:intron:[3430343,3430634] - 291
1 retained intron: SPAC3H5.11:intron:[3413295,3413368] - 73
9 retained intron: SPAC3H5.11:intron:[3413520,3413570] - 50
1 retained intron: SPAC3H5.11:intron:[3414238,3414291] - 53
12 retained intron: SPAC3H5.13:intron:[3412569,3412609] - 40
9 retained intron: SPAC3H5.13:intron:[3412731,3412777] - 46
18 retained intron: SPAC3H8.05c:intron:[594731,594770] - 39
2 retained intron: SPAC3H8.05c:intron:[594859,594899] - 40
7 retained intron: SPAC3H8.07c:intron:[601282,601326] - 44
6 retained intron: SPAC3H8.09c:intron:[605355,605437] - 82
2 retained intron: SPAC3H8.10:intron:[609150,609198] - 48
42 retained intron: SPAC3H8.10:intron:[609501,609697] - 196
22 retained intron: SPAC3H8.10:intron:[609820,609883] - 63
2 retained intron: SPAC458.02c:intron:[4733599,4733719] - 120
20 retained intron: SPAC458.04c:intron:[4738147,4738188] - 41
1 retained intron: SPAC458.04c:intron:[4738283,4738329] - 46
29 retained intron: SPAC458.04c:intron:[4738554,4738596] - 42
8 retained intron: SPAC458.04c:intron:[4738740,4738778] - 38
41 retained intron: SPAC458.06:intron:[4742983,4743034] - 51
32 retained intron: SPAC458.06:intron:[4743135,4743183] - 48
8 retained intron: SPAC458.06:intron:[4743272,4743328] - 56
4 retained intron: SPAC458.06:intron:[4743420,4743469] - 49
4 retained intron: SPAC458.07:intron:[4744690,4744732] - 42
7 retained intron: SPAC458.07:intron:[4744828,4744869] - 41
4 retained intron: SPAC458.07:intron:[4745011,4745139] - 128
5 retained intron: SPAC4A8.02c:intron:[2540642,2540692] - 50
1 retained intron: SPAC4A8.07c:intron:[2557848,2557937] - 89
5 retained intron: SPAC4A8.07c:intron:[2558123,2558182] - 59
9 retained intron: SPAC4A8.08c:intron:[2561080,2561120] - 40
1 retained intron: SPAC4A8.08c:intron:[2561562,2561615] - 53
2 retained intron: SPAC4A8.09c:intron:[2563889,2563960] - 71
1 retained intron: SPAC4A8.10:intron:[2564086,2564156] - 70
1 retained intron: SPAC4A8.12c:intron:[2574295,2574350] - 55
1 retained intron: SPAC4A8.14:intron:[2577577,2577619] - 42
1 retained intron: SPAC4A8.15c:intron:[2579027,2579083] - 56
1 retained intron: SPAC4A8.15c:intron:[2579416,2579465] - 49
13 retained intron: SPAC4C5.01:intron:[1192592,1192661] - 69
15 retained intron: SPAC4C5.01:intron:[1192704,1192778] - 74
1 retained intron: SPAC4C5.01:intron:[1192841,1192915] - 74
10 retained intron: SPAC4C5.01:intron:[1193145,1193196] - 51
8 retained intron: SPAC4C5.02c:intron:[1194407,1194519] - 112
5 retained intron: SPAC4C5.02c:intron:[1194631,1194710] - 79
3 retained intron: SPAC4C5.02c:intron:[1194870,1194913] - 43
6 retained intron: SPAC4C5.04:intron:[1199397,1199453] - 56
2 retained intron: SPAC4D7.02c:intron:[5353425,5353556] - 131
1 retained intron: SPAC4D7.04c:intron:[5357502,5357557] - 55
26 retained intron: SPAC4D7.04c:intron:[5357774,5357820] - 46
7 retained intron: SPAC4D7.04c:intron:[5358080,5358192] - 112
29 retained intron: SPAC4D7.05:intron:[5359018,5359073] - 55
20 retained intron: SPAC4D7.05:intron:[5359194,5359550] - 356
3 retained intron: SPAC4D7.06c:intron:[5361331,5361502] - 171
1 retained intron: SPAC4D7.08c:intron:[5365964,5366339] - 375
1 retained intron: SPAC4D7.09:intron:[5367696,5367820] - 124
23 retained intron: SPAC4D7.09:intron:[5368091,5368217] - 126
7 retained intron: SPAC4D7.09:intron:[5368659,5368700] - 41
7 retained intron: SPAC4D7.09:intron:[5368843,5368914] - 71
1 retained intron: SPAC4D7.10c:intron:[5369559,5369727] - 168
3 retained intron: SPAC4D7.10c:intron:[5369782,5369973] - 191
1 retained intron: SPAC4D7.11:intron:[5372301,5372355] - 54
8 retained intron: SPAC4D7.11:intron:[5372398,5372502] - 104
1 retained intron: SPAC4D7.12c:intron:[5374281,5374326] - 45
1 retained intron: SPAC4F10.02:intron:[4833160,4833256] - 96
1 retained intron: SPAC4F10.03c:intron:[4835703,4835921] - 218
1 retained intron: SPAC4F10.04:intron:[4837267,4837310] - 43
1 retained intron: SPAC4F10.07c:intron:[4842891,4843135] - 244
3 retained intron: SPAC4F10.08:intron:[4844140,4844196] - 56
6 retained intron: SPAC4F10.08:intron:[4844280,4844332] - 52
193 retained intron: SPAC4F10.08:intron:[4845824,4845862] - 38
7 retained intron: SPAC4F10.08:intron:[4846063,4846103] - 40
26 retained intron: SPAC4F10.11:intron:[4853265,4853302] - 37
13 retained intron: SPAC4F10.11:intron:[4853899,4853944] - 45
2 retained intron: SPAC4F10.16c:intron:[4864537,4864583] - 46
1 retained intron: SPAC4F10.18:intron:[4870525,4870576] - 51
1 retained intron: SPAC4F10.18:intron:[4870653,4870822] - 169
4 retained intron: SPAC4F10.19c:intron:[4872572,4872685] - 113
1 retained intron: SPAC4F10.20:intron:[4874289,4874383] - 94
27 retained intron: SPAC4F10.20:intron:[4874436,4874604] - 168
36 retained intron: SPAC4F10.20:intron:[4874702,4874825] - 123
37 retained intron: SPAC4F8.01:intron:[2675398,2675555] - 157
28 retained intron: SPAC4F8.01:intron:[2675606,2675688] - 82
7 retained intron: SPAC4F8.03:intron:[2672783,2672977] - 194
1 retained intron: SPAC4F8.14c:intron:[2643572,2643611] - 39
25 retained intron: SPAC4F8.14c:intron:[2643683,2643859] - 176
4 retained intron: SPAC4G8.02c:intron:[756610,756778] - 168
4 retained intron: SPAC4G8.02c:intron:[756881,756988] - 107
16 retained intron: SPAC4G8.04:intron:[769748,769811] - 63
1 retained intron: SPAC4G8.08:intron:[777731,777890] - 159
4 retained intron: SPAC4G8.12c:intron:[785632,785697] - 65
1 retained intron: SPAC4G8.12c:intron:[785855,785895] - 40
19 retained intron: SPAC4G8.12c:intron:[786229,786273] - 44
14 retained intron: SPAC4G8.12c:intron:[786399,786439] - 40
55 retained intron: SPAC4G9.04c:intron:[2258623,2258671] - 48
1 retained intron: SPAC4G9.05:intron:[2259572,2259621] - 49
38 retained intron: SPAC4G9.05:intron:[2261312,2261354] - 42
39 retained intron: SPAC4G9.06c:intron:[2262129,2262194] - 65
3 retained intron: SPAC4G9.06c:intron:[2262340,2262386] - 46
7 retained intron: SPAC4G9.12:intron:[2276974,2277025] - 51
1 retained intron: SPAC4G9.13c:intron:[2278994,2279090] - 96
1 retained intron: SPAC4G9.14:intron:[2280766,2280859] - 93
27 retained intron: SPAC4G9.14:intron:[2280882,2280991] - 109
2 retained intron: SPAC4G9.14:intron:[2281120,2281167] - 47
9 retained intron: SPAC4G9.14:intron:[2281239,2281307] - 68
1 retained intron: SPAC4G9.15:intron:[2282242,2282302] - 60
101 retained intron: SPAC4G9.15:intron:[2282433,2282482] - 49
2 retained intron: SPAC4G9.17c:intron:[2284717,2284844] - 127
1 retained intron: SPAC4G9.20c:intron:[2289546,2289947] - 401
1 retained intron: SPAC4H3.01:intron:[3823020,3823058] - 38
6 retained intron: SPAC4H3.01:intron:[3823886,3823931] - 45
5 retained intron: SPAC4H3.02c:intron:[3825495,3825552] - 57
1 retained intron: SPAC4H3.04c:intron:[3831683,3831774] - 91
3 retained intron: SPAC4H3.04c:intron:[3831956,3832015] - 59
14 retained intron: SPAC4H3.05:intron:[3833136,3833201] - 65
2 retained intron: SPAC4H3.06:intron:[3837751,3837810] - 59
12 retained intron: SPAC4H3.06:intron:[3837890,3837939] - 49
3 retained intron: SPAC4H3.07c:intron:[3838770,3838836] - 66
4 retained intron: SPAC4H3.07c:intron:[3839056,3839105] - 49
3 retained intron: SPAC4H3.07c:intron:[3839157,3839281] - 124
18 retained intron: SPAC4H3.09:intron:[3843577,3843765] - 188
7 retained intron: SPAC4H3.09:intron:[3843934,3844014] - 80
9 retained intron: SPAC4H3.13:intron:[3853112,3853189] - 77
1 retained intron: SPAC4H3.14c:intron:[3854745,3854799] - 54
1 retained intron: SPAC4H3.16:intron:[3835672,3835718] - 46
1 retained intron: SPAC4H3.16:intron:[3835926,3835966] - 40
35 retained intron: SPAC513.03:intron:[2913020,2913062] - 42
1 retained intron: SPAC56E4.05:intron:[1255953,1256011] - 58
1 retained intron: SPAC56F8.04c:intron:[1134283,1134331] - 48
1 retained intron: SPAC56F8.05c:intron:[1135061,1135194] - 133
8 retained intron: SPAC56F8.05c:intron:[1135402,1135516] - 114
5 retained intron: SPAC56F8.05c:intron:[1135684,1135728] - 44
39 retained intron: SPAC56F8.05c:intron:[1135776,1135931] - 155
55 retained intron: SPAC56F8.06c:intron:[1136754,1136796] - 42
1 retained intron: SPAC56F8.08:intron:[1139333,1139447] - 114
1 retained intron: SPAC56F8.11:intron:[1145696,1145887] - 191
35 retained intron: SPAC56F8.11:intron:[1146041,1146109] - 68
8 retained intron: SPAC57A10.03:intron:[1368240,1368280] - 40
6 retained intron: SPAC57A10.03:intron:[1368322,1368387] - 65
22 retained intron: SPAC57A10.03:intron:[1368441,1368645] - 204
2 retained intron: SPAC57A10.03:intron:[1368725,1368807] - 82
46 retained intron: SPAC57A10.03:intron:[1368904,1368944] - 40
12 retained intron: SPAC57A10.04:intron:[1370394,1370457] - 63
1 retained intron: SPAC57A10.06:intron:[1376947,1377031] - 84
1 retained intron: SPAC57A10.08c:intron:[1378620,1378662] - 42
2 retained intron: SPAC57A10.08c:intron:[1378773,1378822] - 49
19 retained intron: SPAC57A10.09c:intron:[1380975,1381267] - 292
24 retained intron: SPAC57A10.09c:intron:[1381326,1381406] - 80
17 retained intron: SPAC57A10.10c:intron:[1383224,1383299] - 75
1 retained intron: SPAC57A10.14:intron:[1371620,1371673] - 53
50 retained intron: SPAC57A10.14:intron:[1372044,1372280] - 236
3 retained intron: SPAC57A7.10c:intron:[1523837,1523896] - 59
1 retained intron: SPAC57A7.13:intron:[1513366,1513408] - 42
26 retained intron: SPAC57A7.13:intron:[1514014,1514085] - 71
16 retained intron: SPAC57A7.13:intron:[1514316,1514370] - 54
54 retained intron: SPAC57A7.15c:intron:[1545608,1545660] - 52
1 retained intron: SPAC589.02c:intron:[3098590,3098625] - 35
1 retained intron: SPAC589.03c:intron:[3099419,3099482] - 63
1 retained intron: SPAC589.04:intron:[3100667,3100746] - 79
1 retained intron: SPAC589.05c:intron:[3102149,3102282] - 133
9 retained intron: SPAC589.05c:intron:[3102431,3102477] - 46
6 retained intron: SPAC589.06c:intron:[3103565,3103707] - 142
1 retained intron: SPAC589.07c:intron:[3104364,3104432] - 68
2 retained intron: SPAC589.07c:intron:[3105153,3105218] - 65
11 retained intron: SPAC589.07c:intron:[3105378,3105440] - 62
2 retained intron: SPAC589.11:intron:[3109312,3109605] - 293
1 retained intron: SPAC589.12:intron:[3110323,3110507] - 184
1 retained intron: SPAC5D6.01:intron:[1512198,1512345] - 147
1 retained intron: SPAC5D6.04:intron:[1506731,1506767] - 36
7 retained intron: SPAC5D6.05:intron:[1504174,1504227] - 53
11 retained intron: SPAC5D6.05:intron:[1504350,1504403] - 53
27 retained intron: SPAC5D6.05:intron:[1504509,1504611] - 102
1 retained intron: SPAC5D6.06c:intron:[1503373,1503419] - 46
3 retained intron: SPAC5D6.08c:intron:[1499358,1499433] - 75
1 retained intron: SPAC607.02c:intron:[2039885,2039931] - 46
13 retained intron: SPAC607.02c:intron:[2040300,2040348] - 48
16 retained intron: SPAC607.03c:intron:[2041295,2041445] - 150
1 retained intron: SPAC607.05:intron:[2043954,2044008] - 54
1 retained intron: SPAC607.06c:intron:[2045245,2045283] - 38
5 retained intron: SPAC630.03:intron:[350511,350574] - 63
40 retained intron: SPAC630.03:intron:[350598,350670] - 72
14 retained intron: SPAC630.03:intron:[351199,351294] - 95
11 retained intron: SPAC630.03:intron:[351894,351959] - 65
4 retained intron: SPAC630.06c:intron:[356433,356510] - 77
13 retained intron: SPAC630.06c:intron:[356592,356634] - 42
6 retained intron: SPAC630.06c:intron:[356904,356983] - 79
13 retained intron: SPAC630.11:intron:[366817,366872] - 55
10 retained intron: SPAC630.11:intron:[366891,366967] - 76
22 retained intron: SPAC630.11:intron:[367040,367104] - 64
2 retained intron: SPAC630.11:intron:[367189,367292] - 103
47 retained intron: SPAC630.11:intron:[367348,367394] - 46
1 retained intron: SPAC630.14c:intron:[375830,376093] - 263
3 retained intron: SPAC630.14c:intron:[376446,376843] - 397
1 retained intron: SPAC631.01c:intron:[2104600,2104649] - 49
11 retained intron: SPAC631.01c:intron:[2105046,2105243] - 197
32 retained intron: SPAC637.04:intron:[4544082,4544121] - 39
2 retained intron: SPAC637.05c:intron:[4547579,4547624] - 45
2 retained intron: SPAC637.05c:intron:[4548616,4548674] - 58
1 retained intron: SPAC637.10c:intron:[4557955,4558018] - 63
7 retained intron: SPAC637.10c:intron:[4558342,4558421] - 79
26 retained intron: SPAC637.10c:intron:[4558568,4558610] - 42
1 retained intron: SPAC644.04:intron:[2677373,2677427] - 54
1 retained intron: SPAC644.08:intron:[2688263,2688316] - 53
1 retained intron: SPAC644.09:intron:[2689771,2690152] - 381
14 retained intron: SPAC644.09:intron:[2690272,2690407] - 135
3 retained intron: SPAC644.09:intron:[2690743,2690803] - 60
7 retained intron: SPAC644.11c:intron:[2693106,2693185] - 79
13 retained intron: SPAC644.11c:intron:[2693352,2693435] - 83
10 retained intron: SPAC644.15:intron:[2700521,2700657] - 136
1 retained intron: SPAC644.16:intron:[2701653,2701693] - 40
1 retained intron: SPAC644.18c:intron:[2705024,2705075] - 51
17 retained intron: SPAC644.18c:intron:[2705361,2705408] - 47
40 retained intron: SPAC644.18c:intron:[2705503,2705552] - 49
9 retained intron: SPAC664.02c:intron:[1706291,1706358] - 67
2 retained intron: SPAC664.02c:intron:[1706879,1706927] - 48
1 retained intron: SPAC664.02c:intron:[1707105,1707149] - 44
1 retained intron: SPAC664.03:intron:[1708824,1708861] - 37
1 retained intron: SPAC664.04c:intron:[1710549,1710692] - 143
1 retained intron: SPAC664.06:intron:[1712939,1713156] - 217
1 retained intron: SPAC664.07c:intron:[1714317,1714373] - 56
2 retained intron: SPAC664.07c:intron:[1714987,1715044] - 57
13 retained intron: SPAC664.07c:intron:[1715378,1715431] - 53
1 retained intron: SPAC664.12c:intron:[1728730,1728816] - 86
1 retained intron: SPAC688.02c:intron:[3113999,3114128] - 129
10 retained intron: SPAC688.02c:intron:[3114276,3114362] - 86
13 retained intron: SPAC688.03c:intron:[3114973,3115102] - 129
1 retained intron: SPAC688.06c:intron:[3118862,3118946] - 84
1 retained intron: SPAC688.08:intron:[3125057,3125098] - 41
17 retained intron: SPAC688.08:intron:[3126310,3126355] - 45
1 retained intron: SPAC688.14:intron:[3141603,3141651] - 48
19 retained intron: SPAC688.14:intron:[3142329,3142395] - 66
8 retained intron: SPAC688.14:intron:[3142667,3142718] - 51
1 retained intron: SPAC688.16:intron:[3144046,3144124] - 78
1 retained intron: SPAC694.03:intron:[4205870,4205936] - 66
1 retained intron: SPAC694.04c:intron:[4207714,4208057] - 343
1 retained intron: SPAC694.05c:intron:[4208500,4208553] - 53
2 retained intron: SPAC694.05c:intron:[4208794,4208844] - 50
675 retained intron: SPAC6B12.08:intron:[2426279,2426413] - 134
1 retained intron: SPAC6B12.10c:intron:[2430459,2430543] - 84
1 retained intron: SPAC6B12.11:intron:[2431816,2431856] - 40
2 retained intron: SPAC6B12.15:intron:[2439657,2439854] - 197
191 retained intron: SPAC6B12.15:intron:[2440253,2440506] - 253
6 retained intron: SPAC6B12.16:intron:[2443634,2443740] - 106
1 retained intron: SPAC6C3.03c:intron:[2327498,2327549] - 51
4 retained intron: SPAC6C3.04:intron:[2327862,2328646] - 784
1 retained intron: SPAC6C3.06c:intron:[2332256,2332305] - 49
3 retained intron: SPAC6C3.06c:intron:[2332385,2332436] - 51
1 retained intron: SPAC6C3.06c:intron:[2332563,2332604] - 41
6 retained intron: SPAC6C3.08:intron:[2338279,2338417] - 138
1 retained intron: SPAC6C3.09:intron:[2339976,2340020] - 44
13 retained intron: SPAC6C3.09:intron:[2340168,2340218] - 50
3 retained intron: SPAC6C3.09:intron:[2340275,2340391] - 116
16 retained intron: SPAC6C3.09:intron:[2340950,2340990] - 40
18 retained intron: SPAC6F12.07:intron:[1321483,1321781] - 298
79 retained intron: SPAC6F12.07:intron:[1321841,1321902] - 61
6 retained intron: SPAC6F12.07:intron:[1322088,1322137] - 49
2 retained intron: SPAC6F12.08c:intron:[1323955,1323998] - 43
7 retained intron: SPAC6F12.08c:intron:[1324140,1324194] - 54
3 retained intron: SPAC6F12.08c:intron:[1324377,1324430] - 53
1 retained intron: SPAC6F12.09:intron:[1325005,1325085] - 80
1 retained intron: SPAC6F12.12:intron:[1336320,1336388] - 68
1 retained intron: SPAC6F12.12:intron:[1336632,1336704] - 72
4 retained intron: SPAC6F12.13c:intron:[1339375,1339580] - 205
7 retained intron: SPAC6F12.13c:intron:[1339700,1339868] - 168
6 retained intron: SPAC6F12.14:intron:[1340533,1340825] - 292
37 retained intron: SPAC6F12.14:intron:[1341544,1341582] - 38
7 retained intron: SPAC6F12.15c:intron:[1342922,1342978] - 56
2 retained intron: SPAC6F12.15c:intron:[1343114,1343167] - 53
9 retained intron: SPAC6F12.17:intron:[1350871,1350914] - 43
1 retained intron: SPAC6F6.05:intron:[2740840,2740893] - 53
1 retained intron: SPAC6F6.07c:intron:[2746128,2746192] - 64
24 retained intron: SPAC6F6.07c:intron:[2746239,2746302] - 63
496 retained intron: SPAC6F6.07c:intron:[2746335,2746438] - 103
1 retained intron: SPAC6F6.08c:intron:[2747266,2747340] - 74
1 retained intron: SPAC6F6.09:intron:[2749100,2749163] - 63
1 retained intron: SPAC6F6.10c:intron:[2750869,2750909] - 40
1 retained intron: SPAC6F6.11c:intron:[2752152,2752211] - 59
4 retained intron: SPAC6F6.11c:intron:[2752329,2752386] - 57
15 retained intron: SPAC6F6.11c:intron:[2752731,2752773] - 42
20 retained intron: SPAC6F6.12:intron:[2754899,2754967] - 68
22 retained intron: SPAC6F6.12:intron:[2755103,2755191] - 88
4 retained intron: SPAC6F6.15:intron:[2762096,2762184] - 88
549 retained intron: SPAC6F6.15:intron:[2762382,2762453] - 71
36 retained intron: SPAC6F6.15:intron:[2762493,2762561] - 68
4 retained intron: SPAC6F6.15:intron:[2762585,2762661] - 76
38 retained intron: SPAC6F6.15:intron:[2762722,2762786] - 64
2 retained intron: SPAC6F6.15:intron:[2762833,2762874] - 41
14 retained intron: SPAC6F6.15:intron:[2763126,2763180] - 54
9 retained intron: SPAC6F6.16c:intron:[2764572,2764610] - 38
5 retained intron: SPAC6F6.16c:intron:[2764752,2764790] - 38
14 retained intron: SPAC6F6.16c:intron:[2764825,2764871] - 46
6 retained intron: SPAC6F6.16c:intron:[2765122,2765165] - 43
5 retained intron: SPAC6F6.16c:intron:[2765263,2765319] - 56
10 retained intron: SPAC6G10.04c:intron:[3221620,3221794] - 174
7 retained intron: SPAC6G10.04c:intron:[3221898,3221948] - 50
55 retained intron: SPAC6G10.04c:intron:[3222079,3222122] - 43
16 retained intron: SPAC6G10.05c:intron:[3222782,3222847] - 65
1 retained intron: SPAC6G10.06:intron:[3226980,3227041] - 61
3 retained intron: SPAC6G10.06:intron:[3227383,3227455] - 72
2 retained intron: SPAC6G10.07:intron:[3228783,3228832] - 49
1 retained intron: SPAC6G9.01c:intron:[3241570,3241654] - 84
4 retained intron: SPAC6G9.01c:intron:[3241753,3242151] - 398
13 retained intron: SPAC6G9.03c:intron:[3246912,3246956] - 44
3 retained intron: SPAC6G9.03c:intron:[3247580,3247625] - 45
17 retained intron: SPAC6G9.05:intron:[3253391,3253439] - 48
1 retained intron: SPAC6G9.07c:intron:[3258748,3258929] - 181
20 retained intron: SPAC6G9.07c:intron:[3259053,3259183] - 130
5 retained intron: SPAC6G9.07c:intron:[3259386,3259441] - 55
3 retained intron: SPAC6G9.11:intron:[3268512,3268576] - 64
1 retained intron: SPAC6G9.13c:intron:[3272265,3272416] - 151
1 retained intron: SPAC6G9.14:intron:[3275874,3275924] - 50
1 retained intron: SPAC6G9.16c:intron:[3279539,3279682] - 143
8 retained intron: SPAC6G9.16c:intron:[3279819,3279864] - 45
16 retained intron: SPAC732.01:intron:[2057624,2057663] - 39
62 retained intron: SPAC732.01:intron:[2057695,2057727] - 32
38 retained intron: SPAC732.01:intron:[2057837,2057892] - 55
3 retained intron: SPAC732.01:intron:[2057928,2057973] - 45
2 retained intron: SPAC732.01:intron:[2058044,2058336] - 292
5 retained intron: SPAC7D4.02c:intron:[2637808,2637978] - 170
33 retained intron: SPAC7D4.02c:intron:[2638210,2638303] - 93
3 retained intron: SPAC7D4.02c:intron:[2639057,2639120] - 63
4 retained intron: SPAC7D4.05:intron:[2629819,2629908] - 89
2 retained intron: SPAC7D4.05:intron:[2629985,2630020] - 35
15 retained intron: SPAC7D4.09c:intron:[2622420,2622471] - 51
1 retained intron: SPAC7D4.10:intron:[2621519,2621661] - 142
1 retained intron: SPAC7D4.10:intron:[2621725,2621775] - 50
2 retained intron: SPAC7D4.13c:intron:[2613310,2613382] - 72
1 retained intron: SPAC806.02c:intron:[235053,235102] - 49
2 retained intron: SPAC806.04c:intron:[241537,241588] - 51
2 retained intron: SPAC806.04c:intron:[241709,241756] - 47
8 retained intron: SPAC806.04c:intron:[242815,242916] - 101
40 retained intron: SPAC806.05:intron:[247438,247490] - 52
1 retained intron: SPAC821.05:intron:[988422,988461] - 39
7 retained intron: SPAC821.05:intron:[988568,988747] - 179
4 retained intron: SPAC821.06:intron:[990289,990338] - 49
13 retained intron: SPAC821.06:intron:[990413,990471] - 58
5 retained intron: SPAC821.06:intron:[990600,990711] - 111
2 retained intron: SPAC821.06:intron:[990793,990855] - 62
1 retained intron: SPAC821.12:intron:[1009023,1009068] - 45
2 retained intron: SPAC823.03:intron:[2585943,2585990] - 47
1 retained intron: SPAC823.04:intron:[2587897,2587951] - 54
2 retained intron: SPAC823.04:intron:[2588028,2588030] - 2
69 retained intron: SPAC823.04:intron:[2588143,2588181] - 38
2 retained intron: SPAC823.05c:intron:[2589275,2589327] - 52
1 retained intron: SPAC823.09c:intron:[2594734,2594791] - 57
3 retained intron: SPAC823.09c:intron:[2594913,2594965] - 52
4 retained intron: SPAC823.09c:intron:[2595693,2595733] - 40
11 retained intron: SPAC823.10c:intron:[2596736,2596804] - 68
1 retained intron: SPAC823.11:intron:[2598495,2598551] - 56
18 retained intron: SPAC823.11:intron:[2599299,2599351] - 52
1 retained intron: SPAC823.14:intron:[2606227,2606278] - 51
2 retained intron: SPAC823.14:intron:[2606317,2606540] - 223
32 retained intron: SPAC823.14:intron:[2606613,2606654] - 41
14 retained intron: SPAC823.15:intron:[2607958,2608088] - 130
1 retained intron: SPAC823.16c:intron:[2609481,2609521] - 40
7 retained intron: SPAC823.16c:intron:[2610454,2610528] - 74
9 retained intron: SPAC823.16c:intron:[2610602,2610660] - 58
8 retained intron: SPAC824.05:intron:[1692037,1692077] - 40
2 retained intron: SPAC824.06:intron:[1695104,1695151] - 47
4 retained intron: SPAC824.06:intron:[1695199,1695252] - 53
44 retained intron: SPAC824.07:intron:[1696689,1696831] - 142
1 retained intron: SPAC824.09c:intron:[1700959,1701097] - 138
4 retained intron: SPAC824.09c:intron:[1701142,1701213] - 71
1 retained intron: SPAC824.09c:intron:[1701292,1701361] - 69
9 retained intron: SPAC824.09c:intron:[1701405,1701449] - 44
2 retained intron: SPAC890.03:intron:[5004694,5004741] - 47
5 retained intron: SPAC890.03:intron:[5004952,5005120] - 168
2 retained intron: SPAC890.04c:intron:[5008344,5008706] - 362
1 retained intron: SPAC890.07c:intron:[5016026,5016075] - 49
1 retained intron: SPAC890.07c:intron:[5016215,5016261] - 46
2 retained intron: SPAC890.07c:intron:[5017059,5017137] - 78
8 retained intron: SPAC890.07c:intron:[5017252,5017420] - 168
8 retained intron: SPAC890.07c:intron:[5017433,5017699] - 266
2 retained intron: SPAC890.07c:intron:[5017703,5017781] - 78
1 retained intron: SPAC890.08:intron:[5018272,5018392] - 120
1 retained intron: SPAC8C9.03:intron:[3643368,3643633] - 265
1 retained intron: SPAC8C9.05:intron:[3649601,3649715] - 114
1 retained intron: SPAC8C9.05:intron:[3649749,3649798] - 49
4 retained intron: SPAC8C9.05:intron:[3649827,3649938] - 111
1 retained intron: SPAC8C9.05:intron:[3650058,3650116] - 58
2 retained intron: SPAC8C9.05:intron:[3650260,3650337] - 77
1 retained intron: SPAC8C9.05:intron:[3650341,3650389] - 48
6 retained intron: SPAC8C9.08:intron:[3655253,3655469] - 216
1 retained intron: SPAC8C9.10c:intron:[3658832,3658877] - 45
8 retained intron: SPAC8C9.10c:intron:[3658961,3659006] - 45
10 retained intron: SPAC8C9.11:intron:[3659191,3659270] - 79
1 retained intron: SPAC8C9.11:intron:[3659420,3659526] - 106
3 retained intron: SPAC8C9.14:intron:[3666036,3666133] - 97
2 retained intron: SPAC8C9.14:intron:[3666223,3666979] - 756
2 retained intron: SPAC8C9.14:intron:[3667059,3667112] - 53
1 retained intron: SPAC8C9.14:intron:[3667170,3667313] - 143
1 retained intron: SPAC8C9.15c:intron:[3671096,3671165] - 69
1 retained intron: SPAC8C9.15c:intron:[3671290,3671333] - 43
2 retained intron: SPAC8C9.15c:intron:[3671395,3671439] - 44
3 retained intron: SPAC8C9.19:intron:[3660438,3660490] - 52
1 retained intron: SPAC8C9.19:intron:[3660556,3660606] - 50
3 retained intron: SPAC8E11.02c:intron:[3384337,3384744] - 407
1 retained intron: SPAC8E11.03c:intron:[3382404,3382478] - 74
1 retained intron: SPAC8E11.04c:intron:[3380828,3380899] - 71
1 retained intron: SPAC8E11.04c:intron:[3380984,3381095] - 111
3 retained intron: SPAC8E11.04c:intron:[3381344,3381458] - 114
2 retained intron: SPAC8E11.06:intron:[3378021,3378068] - 47
12 retained intron: SPAC8E11.07c:intron:[3377216,3377279] - 63
5 retained intron: SPAC8E11.07c:intron:[3377366,3377518] - 152
6 retained intron: SPAC8F11.02c:intron:[2855090,2855168] - 78
86 retained intron: SPAC8F11.02c:intron:[2855456,2855515] - 59
3 retained intron: SPAC8F11.02c:intron:[2855577,2855619] - 42
4 retained intron: SPAC8F11.04:intron:[2859491,2859618] - 127
1 retained intron: SPAC8F11.05c:intron:[2861354,2861417] - 63
1 retained intron: SPAC8F11.07c:intron:[2864266,2864307] - 41
1 retained intron: SPAC8F11.07c:intron:[2864442,2864487] - 45
8 retained intron: SPAC8F11.07c:intron:[2865151,2865209] - 58
1 retained intron: SPAC8F11.07c:intron:[2865409,2865473] - 64
2 retained intron: SPAC8F11.07c:intron:[2865501,2865555] - 54
2 retained intron: SPAC8F11.07c:intron:[2865640,2865695] - 55
1 retained intron: SPAC8F11.08c:intron:[2866235,2866288] - 53
6 retained intron: SPAC8F11.08c:intron:[2867391,2867762] - 371
68 retained intron: SPAC8F11.09c:intron:[2869171,2869264] - 93
2 retained intron: SPAC8F11.10c:intron:[2871492,2871574] - 82
1 retained intron: SPAC9.02c:intron:[1457541,1457638] - 97
1 retained intron: SPAC9.05:intron:[1472508,1472553] - 45
1 retained intron: SPAC9.06c:intron:[1473885,1473938] - 53
3 retained intron: SPAC9.06c:intron:[1474105,1474152] - 47
6 retained intron: SPAC9.06c:intron:[1474212,1474263] - 51
1 retained intron: SPAC9.06c:intron:[1474341,1474380] - 39
18 retained intron: SPAC9.06c:intron:[1474404,1474459] - 55
5 retained intron: SPAC9.07c:intron:[1475049,1475099] - 50
1 retained intron: SPAC9.07c:intron:[1475899,1475947] - 48
29 retained intron: SPAC9.12c:intron:[1487237,1487286] - 49
1 retained intron: SPAC922.03:intron:[5477883,5477947] - 64
4 retained intron: SPAC926.02:intron:[3884687,3884843] - 156
1 retained intron: SPAC926.05c:intron:[3892505,3892544] - 39
1 retained intron: SPAC926.07c:intron:[3896696,3896766] - 70
3 retained intron: SPAC926.07c:intron:[3896863,3896936] - 73
1 retained intron: SPAC926.07c:intron:[3896971,3897017] - 46
14 retained intron: SPAC926.07c:intron:[3897051,3897101] - 50
1 retained intron: SPAC926.08c:intron:[3899626,3899673] - 47
15 retained intron: SPAC959.02:intron:[3388273,3388316] - 43
20 retained intron: SPAC959.02:intron:[3388434,3388475] - 41
2 retained intron: SPAC959.02:intron:[3388779,3388912] - 133
8 retained intron: SPAC959.04c:intron:[3393028,3393124] - 96
20 retained intron: SPAC959.04c:intron:[3393411,3393482] - 71
3 retained intron: SPAC959.09c:intron:[3401424,3401470] - 46
1 retained intron: SPAC959.09c:intron:[3401913,3401960] - 47
2 retained intron: SPAC959.09c:intron:[3402087,3402137] - 50
1 retained intron: SPAC959.09c:intron:[3402905,3402955] - 50
27 retained intron: SPAC959.09c:intron:[3403576,3403624] - 48
1 retained intron: SPAC977.06:intron:[39848,39898] - 50
1 retained intron: SPAC977.10:intron:[52240,52317] - 77
1 retained intron: SPAC977.16c:intron:[66679,66680] - 1
1 retained intron: SPAC9E9.04:intron:[4443233,4443518] - 285
1 retained intron: SPAC9E9.06c:intron:[4447341,4447399] - 58
1 retained intron: SPAC9E9.08:intron:[4450845,4450925] - 80
9 retained intron: SPAC9E9.13:intron:[4468768,4468967] - 199
1 retained intron: SPAC9G1.04:intron:[1975313,1975378] - 65
35 retained intron: SPAC9G1.04:intron:[1976129,1976205] - 76
15 retained intron: SPAC9G1.05:intron:[1977191,1977261] - 70
14 retained intron: SPAC9G1.05:intron:[1977363,1977403] - 40
42 retained intron: SPAC9G1.05:intron:[1977449,1977555] - 106
1 retained intron: SPAC9G1.05:intron:[1977601,1977650] - 49
15 retained intron: SPAC9G1.05:intron:[1978592,1978638] - 46
5 retained intron: SPAC9G1.06c:intron:[1981957,1982040] - 83
1 retained intron: SPAC9G1.10c:intron:[1987471,1987508] - 37
1 retained intron: SPAC9G1.13c:intron:[1996148,1996190] - 42
7 retained intron: SPAC9G1.13c:intron:[1996268,1996324] - 56
2 retained intron: SPAC9G1.13c:intron:[1996413,1996477] - 64
24 retained intron: SPACUNK12.02c:intron:[1738198,1738260] - 62
3 retained intron: SPACUNK12.02c:intron:[1738591,1738663] - 72
47 retained intron: SPACUNK12.02c:intron:[1738876,1738923] - 47
3 retained intron: SPACUNK4.06c:intron:[2902761,2902828] - 67
1 retained intron: SPACUNK4.10:intron:[2891258,2891309] - 51
7 retained intron: SPACUNK4.10:intron:[2892175,2892431] - 256
225 retained intron: SPACUNK4.11c:intron:[2890184,2890239] - 55
1 retained intron: SPACUNK4.13c:intron:[2885526,2885591] - 65
2 retained intron: SPACUNK4.13c:intron:[2885632,2885723] - 91
3 retained intron: SPACUNK4.14:intron:[2884783,2884839] - 56
1 retained intron: SPAP14E8.02:intron:[1923085,1923192] - 107
1 retained intron: SPAP14E8.03:intron:[1925125,1925176] - 51
6 retained intron: SPAP14E8.03:intron:[1925273,1925345] - 72
65 retained intron: SPAP27G11.03:intron:[1613854,1613922] - 68
1 retained intron: SPAP27G11.04c:intron:[1615336,1615379] - 43
1 retained intron: SPAP27G11.05c:intron:[1616168,1616213] - 45
1 retained intron: SPAP27G11.05c:intron:[1618349,1618390] - 41
1 retained intron: SPAP27G11.06c:intron:[1619727,1619784] - 57
3 retained intron: SPAP27G11.06c:intron:[1619915,1619968] - 53
14 retained intron: SPAP27G11.07c:intron:[1620608,1620656] - 48
1 retained intron: SPAP27G11.08c:intron:[1622195,1622245] - 50
1 retained intron: SPAP27G11.10c:intron:[1629753,1629824] - 71
1 retained intron: SPAP27G11.12:intron:[1632087,1632166] - 79
1 retained intron: SPAP27G11.13c:intron:[1635274,1635326] - 52
1 retained intron: SPAP27G11.15:intron:[1638741,1638782] - 41
1 retained intron: SPAP4C9.02:intron:[3791111,3791153] - 42
1 retained intron: SPAP7G5.02c:intron:[3735517,3735560] - 43
7 retained intron: SPAP7G5.03:intron:[3738464,3738504] - 40
1 retained intron: SPAP8A3.05:intron:[5323251,5323311] - 60
1 retained intron: SPAP8A3.05:intron:[5324283,5324323] - 40
4 retained intron: SPAP8A3.05:intron:[5324408,5324445] - 37
2 retained intron: SPAP8A3.07c:intron:[5327829,5328100] - 271
1 retained intron: SPAP8A3.08:intron:[5329248,5329300] - 52
26 retained intron: SPAP8A3.08:intron:[5329432,5329505] - 73
15 retained intron: SPAP8A3.08:intron:[5329646,5329712] - 66
16 retained intron: SPAP8A3.08:intron:[5329805,5329877] - 72
5 retained intron: SPAP8A3.09c:intron:[5332283,5332391] - 108
1 retained intron: SPAP8A3.09c:intron:[5332497,5332551] - 54
5 retained intron: SPAP8A3.09c:intron:[5332599,5332650] - 51
2 retained intron: SPAP8A3.10:intron:[5334260,5334327] - 67
1 retained intron: SPAPB17E12.04c:intron:[1274191,1274230] - 39
4 retained intron: SPAPB17E12.04c:intron:[1274447,1274489] - 42
1 retained intron: SPAPB17E12.05:intron:[1275769,1275836] - 67
1 retained intron: SPAPB17E12.06:intron:[1276846,1276936] - 90
13 retained intron: SPAPB17E12.06:intron:[1276986,1277040] - 54
1 retained intron: SPAPB17E12.06:intron:[1277108,1277168] - 60
5 retained intron: SPAPB17E12.06:intron:[1277270,1277312] - 42
5 retained intron: SPAPB17E12.06:intron:[1277419,1277457] - 38
1 retained intron: SPAPB17E12.07c:intron:[1278092,1278139] - 47
2 retained intron: SPAPB17E12.08:intron:[1279779,1279819] - 40
23 retained intron: SPAPB17E12.08:intron:[1279869,1279952] - 83
5 retained intron: SPAPB17E12.09:intron:[1281060,1281106] - 46
1 retained intron: SPAPB17E12.10c:intron:[1282073,1282116] - 43
2 retained intron: SPAPB17E12.11:intron:[1283335,1283386] - 51
12 retained intron: SPAPB17E12.11:intron:[1283504,1283562] - 58
37 retained intron: SPAPB17E12.11:intron:[1283642,1283758] - 116
13 retained intron: SPAPB17E12.11:intron:[1284105,1284151] - 46
9 retained intron: SPAPB18E9.01:intron:[3974485,3974540] - 55
15 retained intron: SPAPB18E9.01:intron:[3974629,3974673] - 44
4 retained intron: SPAPB18E9.01:intron:[3974775,3974878] - 103
33 retained intron: SPAPB18E9.01:intron:[3975132,3975192] - 60
4 retained intron: SPAPB18E9.01:intron:[3975429,3975484] - 55
3 retained intron: SPAPB18E9.01:intron:[3975832,3975881] - 49
1 retained intron: SPAPB18E9.01:intron:[3975962,3976013] - 51
10 retained intron: SPAPB1A10.04c:intron:[1864880,1864931] - 51
1 retained intron: SPAPB1A10.06c:intron:[1871515,1871562] - 47
1 retained intron: SPAPB1A10.07c:intron:[1872472,1872521] - 49
1 retained intron: SPAPB1A10.08:intron:[1876886,1876958] - 72
1 retained intron: SPAPB1A10.09:intron:[1878785,1878832] - 47
1 retained intron: SPAPB1A10.10c:intron:[1881325,1881379] - 54
7 retained intron: SPAPB1A10.10c:intron:[1881478,1881829] - 351
16 retained intron: SPAPB1A10.12c:intron:[1885876,1886077] - 201
1 retained intron: SPAPB1A10.15:intron:[1892640,1892925] - 285
24 retained intron: SPAPB1A10.15:intron:[1893060,1893115] - 55
1 retained intron: SPAPB1E7.03:intron:[3286667,3286746] - 79
1 retained intron: SPAPB1E7.06c:intron:[3299724,3299780] - 56
2 retained intron: SPAPB1E7.14:intron:[3322018,3322070] - 52
21 retained intron: SPAPB1E7.14:intron:[3322331,3322378] - 47
3 retained intron: SPAPB21F2.02:intron:[492476,492511] - 35
1 retained intron: SPAPB21F2.03:intron:[498173,498214] - 41
1 retained intron: SPAPB2B4.01c:intron:[2706552,2706603] - 51
3 retained intron: SPAPB2B4.01c:intron:[2706671,2706727] - 56
1 retained intron: SPAPB2B4.02:intron:[2708446,2708778] - 332
1 retained intron: SPAPB2B4.05:intron:[2721100,2721201] - 101
5 retained intron: SPAPB2B4.05:intron:[2721355,2721404] - 49
1 retained intron: SPAPB2B4.05:intron:[2721499,2721551] - 52
2 retained intron: SPAPB2B4.05:intron:[2721643,2721747] - 104
4 retained intron: SPAPB2B4.05:intron:[2722008,2722059] - 51
3 retained intron: SPAPB2B4.05:intron:[2722291,2722374] - 83
1 retained intron: SPAPB2B4.06:intron:[2723210,2723272] - 62
27 retained intron: SPAPB2B4.06:intron:[2723300,2723348] - 48
3 retained intron: SPAPB2B4.06:intron:[2723559,2723607] - 48
12 retained intron: SPAPB8E5.02c:intron:[4910744,4910791] - 47
1 retained intron: SPAPB8E5.05:intron:[4916841,4916920] - 79
974 retained intron: SPAPB8E5.05:intron:[4917214,4917285] - 71
1 retained intron: SPAPJ691.03:intron:[5189768,5189968] - 200
1 retained intron: SPAPJ691.03:intron:[5190053,5190124] - 71
10 retained intron: SPAPJ696.01c:intron:[722243,722287] - 44
5 retained intron: SPAPJ696.01c:intron:[722995,723062] - 67
10 retained intron: SPAPJ696.02:intron:[724325,724377] - 52
3 retained intron: SPAPJ696.02:intron:[724418,724505] - 87
1 retained intron: SPAPYUG7.02c:intron:[4746283,4746322] - 39
4 retained intron: SPAPYUG7.04c:intron:[4751734,4751809] - 75
2 retained intron: SPAPYUG7.04c:intron:[4752034,4752157] - 123
6 retained intron: SPAPYUG7.04c:intron:[4752224,4752291] - 67
5 retained intron: SPATRNALYS.04:intron:[2684718,2684726] - 8
1 retained intron: SPBC106.04:intron:[380560,380623] - 63
1 retained intron: SPBC106.05c:intron:[383612,383702] - 90
2 retained intron: SPBC106.05c:intron:[383874,383939] - 65
45 retained intron: SPBC106.12c:intron:[401683,401843] - 160
1 retained intron: SPBC106.12c:intron:[401910,402016] - 106
6 retained intron: SPBC106.12c:intron:[402141,402194] - 53
1 retained intron: SPBC106.13:intron:[402923,402985] - 62
1 retained intron: SPBC106.13:intron:[403507,403557] - 50
6 retained intron: SPBC106.15:intron:[406991,407055] - 64
14 retained intron: SPBC106.15:intron:[407394,407450] - 56
19 retained intron: SPBC106.16:intron:[409594,409654] - 60
43 retained intron: SPBC106.16:intron:[410028,410146] - 118
2 retained intron: SPBC106.18:intron:[413653,413893] - 240
1 retained intron: SPBC106.20:intron:[417399,417459] - 60
1 retained intron: SPBC106.20:intron:[419219,419272] - 53
6 retained intron: SPBC106.20:intron:[419309,419410] - 101
2 retained intron: SPBC1105.01:intron:[3504888,3504930] - 42
6 retained intron: SPBC1105.01:intron:[3505395,3505437] - 42
2 retained intron: SPBC1105.07c:intron:[3518754,3518796] - 42
1 retained intron: SPBC1105.07c:intron:[3519601,3519648] - 47
9 retained intron: SPBC1105.07c:intron:[3519806,3519872] - 66
1 retained intron: SPBC1105.08:intron:[3520559,3520707] - 148
1 retained intron: SPBC1105.09:intron:[3522919,3523001] - 82
11 retained intron: SPBC1105.09:intron:[3523145,3523223] - 78
2 retained intron: SPBC1105.09:intron:[3523253,3523329] - 76
15 retained intron: SPBC1105.09:intron:[3523555,3523625] - 70
17 retained intron: SPBC1105.15c:intron:[3536677,3536710] - 33
2 retained intron: SPBC115.01c:intron:[639428,639511] - 83
1 retained intron: SPBC115.03:intron:[635544,635733] - 189
1 retained intron: SPBC119.01:intron:[712530,712576] - 46
6 retained intron: SPBC119.01:intron:[712672,712716] - 44
4 retained intron: SPBC119.02:intron:[715452,715531] - 79
14 retained intron: SPBC119.02:intron:[715609,715980] - 371
59 retained intron: SPBC119.07:intron:[725608,725682] - 74
1 retained intron: SPBC119.07:intron:[726260,726317] - 57
1 retained intron: SPBC119.08:intron:[731205,731478] - 273
1 retained intron: SPBC119.14:intron:[746447,746600] - 153
6 retained intron: SPBC119.14:intron:[746780,746838] - 58
18 retained intron: SPBC119.14:intron:[747222,747267] - 45
2 retained intron: SPBC119.15:intron:[748137,748193] - 56
3 retained intron: SPBC119.18:intron:[744107,744169] - 62
1 retained intron: SPBC1198.04c:intron:[178651,178689] - 38
8 retained intron: SPBC1198.04c:intron:[179283,179321] - 38
1 retained intron: SPBC1198.08:intron:[187455,187580] - 125
1 retained intron: SPBC1198.10c:intron:[191217,191287] - 70
1 retained intron: SPBC1198.10c:intron:[191414,191488] - 74
2 retained intron: SPBC1198.11c:intron:[192146,192197] - 51
2 retained intron: SPBC1198.11c:intron:[193690,193809] - 119
1 retained intron: SPBC1198.13c:intron:[196244,196347] - 103
3 retained intron: SPBC1198.13c:intron:[196491,196550] - 59
5 retained intron: SPBC11B10.01:intron:[1486236,1486283] - 47
33 retained intron: SPBC11B10.01:intron:[1486400,1486471] - 71
3 retained intron: SPBC11B10.01:intron:[1486925,1487073] - 148
8 retained intron: SPBC11B10.02c:intron:[1488673,1488732] - 59
2 retained intron: SPBC11B10.02c:intron:[1489344,1489529] - 185
5 retained intron: SPBC11B10.06:intron:[1494955,1495017] - 62
1 retained intron: SPBC11B10.07c:intron:[1497019,1497241] - 222
6 retained intron: SPBC11B10.07c:intron:[1497380,1497438] - 58
13 retained intron: SPBC11B10.09:intron:[1500243,1500285] - 42
293 retained intron: SPBC11B10.09:intron:[1500376,1500444] - 68
4 retained intron: SPBC11B10.09:intron:[1500613,1500685] - 72
5 retained intron: SPBC11B10.09:intron:[1500986,1501087] - 101
6 retained intron: SPBC11B10.09:intron:[1501393,1501447] - 54
5 retained intron: SPBC11C11.01:intron:[3344676,3344729] - 53
32 retained intron: SPBC11C11.01:intron:[3344788,3344832] - 44
10 retained intron: SPBC11C11.01:intron:[3344915,3344957] - 42
12 retained intron: SPBC11C11.01:intron:[3345058,3345097] - 39
2 retained intron: SPBC11C11.01:intron:[3345531,3345578] - 47
3 retained intron: SPBC11C11.01:intron:[3345757,3345807] - 50
17 retained intron: SPBC11C11.02:intron:[3348049,3348143] - 94
1 retained intron: SPBC11C11.02:intron:[3349973,3350021] - 48
2 retained intron: SPBC11C11.03:intron:[3350875,3350924] - 49
3 retained intron: SPBC11C11.03:intron:[3351108,3351151] - 43
2 retained intron: SPBC11C11.04c:intron:[3353508,3353550] - 42
9 retained intron: SPBC11C11.04c:intron:[3353944,3353992] - 48
2 retained intron: SPBC11C11.07:intron:[3361819,3361871] - 52
1 retained intron: SPBC11C11.08:intron:[3362969,3363015] - 46
1 retained intron: SPBC11C11.08:intron:[3363072,3363121] - 49
4 retained intron: SPBC11C11.10:intron:[3365894,3365997] - 103
1 retained intron: SPBC11C11.11c:intron:[3368204,3368245] - 41
3 retained intron: SPBC11C11.11c:intron:[3368397,3368445] - 48
2 retained intron: SPBC11C11.11c:intron:[3368475,3368514] - 39
1 retained intron: SPBC11C11.11c:intron:[3368996,3369040] - 44
3 retained intron: SPBC11G11.01:intron:[1758188,1758301] - 113
1 retained intron: SPBC11G11.02c:intron:[1759860,1760084] - 224
11 retained intron: SPBC11G11.02c:intron:[1760161,1760231] - 70
1 retained intron: SPBC11G11.03:intron:[1760848,1761183] - 335
1 retained intron: SPBC11G11.04:intron:[1762522,1762569] - 47
10 retained intron: SPBC11G11.04:intron:[1762652,1762712] - 60
17 retained intron: SPBC11G11.04:intron:[1762774,1762843] - 69
6 retained intron: SPBC11G11.06c:intron:[1764553,1764782] - 229
2 retained intron: SPBC11G11.06c:intron:[1764858,1764967] - 109
10 retained intron: SPBC11G11.06c:intron:[1765057,1765094] - 37
11 retained intron: SPBC1215.01:intron:[1505677,1505760] - 83
1 retained intron: SPBC1215.02c:intron:[1506519,1506579] - 60
4 retained intron: SPBC1215.02c:intron:[1508289,1508329] - 40
2 retained intron: SPBC1271.02:intron:[370716,370775] - 59
1 retained intron: SPBC1271.03c:intron:[367278,367330] - 52
1 retained intron: SPBC1271.04c:intron:[365630,365765] - 135
17 retained intron: SPBC1271.04c:intron:[366542,366594] - 52
2 retained intron: SPBC1271.09:intron:[350740,350786] - 46
1 retained intron: SPBC1271.11:intron:[345947,346057] - 110
1 retained intron: SPBC1271.11:intron:[346178,346245] - 67
30 retained intron: SPBC1271.11:intron:[346253,346309] - 56
1 retained intron: SPBC1271.12:intron:[342098,342144] - 46
236 retained intron: SPBC1271.12:intron:[342950,343009] - 59
2 retained intron: SPBC1271.12:intron:[343322,343504] - 182
24 retained intron: SPBC1271.12:intron:[343627,343770] - 143
3 retained intron: SPBC1271.12:intron:[343849,344021] - 172
30 retained intron: SPBC1271.12:intron:[344047,344122] - 75
16 retained intron: SPBC1271.12:intron:[344135,344185] - 50
13 retained intron: SPBC1271.13:intron:[341519,341582] - 63
1 retained intron: SPBC1289.02c:intron:[4384704,4384815] - 111
5 retained intron: SPBC1289.02c:intron:[4385387,4385449] - 62
47 retained intron: SPBC1289.03c:intron:[4386684,4386818] - 134
16 retained intron: SPBC1289.03c:intron:[4387005,4387190] - 185
61 retained intron: SPBC1289.04c:intron:[4390826,4391021] - 195
1 retained intron: SPBC1289.05c:intron:[4392231,4392287] - 56
12 retained intron: SPBC1289.05c:intron:[4392388,4392431] - 43
9 retained intron: SPBC1289.05c:intron:[4392474,4392521] - 47
2 retained intron: SPBC1289.05c:intron:[4392560,4392607] - 47
19 retained intron: SPBC1289.11:intron:[4404605,4404646] - 41
6 retained intron: SPBC1289.11:intron:[4404751,4404789] - 38
5 retained intron: SPBC1289.11:intron:[4404862,4404911] - 49
14 retained intron: SPBC1289.11:intron:[4405171,4405216] - 45
15 retained intron: SPBC1289.11:intron:[4405460,4405521] - 61
2 retained intron: SPBC1289.12:intron:[4405987,4406026] - 39
1 retained intron: SPBC12C2.05c:intron:[2466282,2466336] - 54
4 retained intron: SPBC12C2.05c:intron:[2467687,2467733] - 46
3 retained intron: SPBC12C2.05c:intron:[2468090,2468133] - 43
11 retained intron: SPBC12C2.05c:intron:[2468398,2468466] - 68
1 retained intron: SPBC12C2.10c:intron:[2452181,2452318] - 137
1 retained intron: SPBC12C2.11:intron:[2450781,2450849] - 68
1 retained intron: SPBC12D12.03:intron:[2307466,2307514] - 48
12 retained intron: SPBC12D12.03:intron:[2307562,2307600] - 38
5 retained intron: SPBC12D12.03:intron:[2307686,2307930] - 244
1 retained intron: SPBC12D12.05c:intron:[2315787,2315824] - 37
1 retained intron: SPBC12D12.06:intron:[2316199,2316611] - 412
40 retained intron: SPBC12D12.06:intron:[2316691,2316769] - 78
4 retained intron: SPBC12D12.06:intron:[2317136,2317200] - 64
3 retained intron: SPBC12D12.07c:intron:[2318251,2318333] - 82
1 retained intron: SPBC12D12.08c:intron:[2319938,2319988] - 50
7 retained intron: SPBC12D12.08c:intron:[2320101,2320172] - 71
43 retained intron: SPBC12D12.08c:intron:[2320190,2320238] - 48
3 retained intron: SPBC12D12.09:intron:[2313574,2313623] - 49
5 retained intron: SPBC12D12.09:intron:[2313650,2313693] - 43
7 retained intron: SPBC12D12.09:intron:[2313744,2313784] - 40
5 retained intron: SPBC12D12.09:intron:[2313897,2313939] - 42
5 retained intron: SPBC12D12.09:intron:[2314055,2314103] - 48
4 retained intron: SPBC12D12.09:intron:[2314207,2314276] - 69
9 retained intron: SPBC1347.03:intron:[4066375,4066416] - 41
1 retained intron: SPBC1347.05c:intron:[4069334,4069389] - 55
4 retained intron: SPBC1347.05c:intron:[4070510,4070584] - 74
3 retained intron: SPBC1347.06c:intron:[4072925,4073008] - 83
5 retained intron: SPBC1347.06c:intron:[4073235,4073278] - 43
18 retained intron: SPBC1347.07:intron:[4073765,4073870] - 105
34 retained intron: SPBC1347.07:intron:[4073951,4074032] - 81
15 retained intron: SPBC1347.07:intron:[4074118,4074237] - 119
9 retained intron: SPBC1347.07:intron:[4074303,4074365] - 62
14 retained intron: SPBC1347.08c:intron:[4076742,4076796] - 54
1 retained intron: SPBC1347.12:intron:[4083953,4083996] - 43
5 retained intron: SPBC1347.12:intron:[4084027,4084096] - 69
3 retained intron: SPBC1347.12:intron:[4084161,4084200] - 39
1 retained intron: SPBC1347.13c:intron:[4085476,4085519] - 43
10 retained intron: SPBC1347.13c:intron:[4085793,4085839] - 46
16 retained intron: SPBC1347.13c:intron:[4086055,4086150] - 95
44 retained intron: SPBC1348.12:intron:[35171,35210] - 39
4 retained intron: SPBC1348.12:intron:[35612,35747] - 135
5 retained intron: SPBC1348.12:intron:[35883,35927] - 44
4 retained intron: SPBC1348.12:intron:[36125,36233] - 108
4 retained intron: SPBC13A2.01c:intron:[3399466,3399547] - 81
5 retained intron: SPBC13E7.01:intron:[3040331,3040333] - 2
1 retained intron: SPBC13E7.05:intron:[3050193,3050243] - 50
1 retained intron: SPBC13E7.09:intron:[3056273,3056325] - 52
1 retained intron: SPBC13E7.09:intron:[3057996,3058075] - 79
1 retained intron: SPBC13E7.10c:intron:[3058060,3058217] - 157
3 retained intron: SPBC13G1.02:intron:[3729857,3729920] - 63
7 retained intron: SPBC13G1.02:intron:[3729960,3730060] - 100
7 retained intron: SPBC13G1.03c:intron:[3732019,3732079] - 60
1 retained intron: SPBC13G1.04c:intron:[3732930,3732993] - 63
1 retained intron: SPBC13G1.05:intron:[3735902,3735948] - 46
4 retained intron: SPBC13G1.05:intron:[3736232,3736287] - 55
4 retained intron: SPBC13G1.06c:intron:[3737142,3737221] - 79
1 retained intron: SPBC13G1.09:intron:[3743352,3743395] - 43
1 retained intron: SPBC13G1.11:intron:[3750272,3750320] - 48
1 retained intron: SPBC13G1.12:intron:[3752376,3752416] - 40
30 retained intron: SPBC13G1.12:intron:[3752436,3752476] - 40
20 retained intron: SPBC13G1.12:intron:[3752554,3752756] - 202
3 retained intron: SPBC13G1.12:intron:[3752903,3752945] - 42
1 retained intron: SPBC13G1.12:intron:[3753014,3753069] - 55
5 retained intron: SPBC13G1.13:intron:[3754392,3754437] - 45
1 retained intron: SPBC13G1.14c:intron:[3727810,3727876] - 66
24 retained intron: SPBC14C8.04:intron:[2210162,2210224] - 62
18 retained intron: SPBC14C8.04:intron:[2210362,2210811] - 449
20 retained intron: SPBC14C8.04:intron:[2211005,2211085] - 80
7 retained intron: SPBC14C8.06:intron:[2214510,2214557] - 47
1 retained intron: SPBC14C8.09c:intron:[2219934,2219936] - 2
1 retained intron: SPBC14C8.12:intron:[2223841,2223900] - 59
39 retained intron: SPBC14C8.12:intron:[2224102,2224150] - 48
7 retained intron: SPBC14C8.15:intron:[2230262,2230316] - 54
[truncated: 2,028 more rows]
