# Supplementary material for: The dynamic landscape of fission yeast meiosis alternative-splice isoforms
Source: HighWire-hosted journal article supplement (doi:10.1101/gr.208041.116), 2016-11-17
Supplement: Supplemental_Table_S12.xlsx [file Supplemental_Table_S12.xlsx]

## Sheet: NG
query	subject	E_value	Align_len	subject_organism
NP111|NG_111|I	gi|891582446|ref|XP_013022204.1|	0.0008	30	Schizosaccharomyces cryophilus OY26
NP111|NG_111|I	gi|891575795|ref|XP_013021310.1|	0.005	52	Schizosaccharomyces cryophilus OY26
NP111|NG_111|I	gi|891595744|ref|XP_013024616.1|	0.007	37	Schizosaccharomyces cryophilus OY26
NP141|NG_141|II	gi|891565677|ref|XP_013019077.1|	0.017	38	Schizosaccharomyces octosporus yFS286
NP277|NG_278|III	gi|891560015|ref|XP_013018391.1|	0.034	58	Schizosaccharomyces octosporus yFS286
NP312|NG_313|I	gi|891568542|ref|XP_013019454.1|	0.046	44	Schizosaccharomyces octosporus yFS286
NP354|NG_355|I	gi|891602256|ref|XP_013025695.1|	0.003	45	Schizosaccharomyces cryophilus OY26
NP354|NG_355|I	gi|891545615|ref|XP_013016394.1|	0.003	45	Schizosaccharomyces octosporus yFS286
NP531|NG_532|II	gi|891602160|ref|XP_013025647.1|	0.016	30	Schizosaccharomyces cryophilus OY26
NP531|NG_532|II	gi|891546271|ref|XP_013016442.1|	0.039	30	Schizosaccharomyces octosporus yFS286
NP553|NG_554|II	gi|891579019|ref|XP_013020827.1|	7e-22	107	Schizosaccharomyces octosporus yFS286
NP553|NG_554|II	gi|891586057|ref|XP_013022971.1|	5e-20	107	Schizosaccharomyces cryophilus OY26
NP553|NG_554|II	gi|891565526|ref|XP_013019002.1|	5e-16	111	Schizosaccharomyces octosporus yFS286
NP553|NG_554|II	gi|891595748|ref|XP_013024618.1|	5e-14	109	Schizosaccharomyces cryophilus OY26
NP553|NG_554|II	gi|213405161|ref|XP_002173352.1|	4e-10	74	Schizosaccharomyces japonicus yFS275
NP553|NG_554|II	gi|213401445|ref|XP_002171495.1|	3e-06	65	Schizosaccharomyces japonicus yFS275
NP568|NG_569|III	gi|891582319|ref|XP_013022153.1|	6e-49	233	Schizosaccharomyces cryophilus OY26
NP568|NG_569|III	gi|891585984|ref|XP_013022942.1|	1e-43	225	Schizosaccharomyces cryophilus OY26
NP568|NG_569|III	gi|891582279|ref|XP_013022133.1|	5e-37	189	Schizosaccharomyces cryophilus OY26
NP568|NG_569|III	gi|927347884|gb|ALE15148.1|	4e-33	217	Schizosaccharomyces japonicus
NP731|NG_I_139|III	gi|213408028|ref|XP_002174785.1|	0.009	34	Schizosaccharomyces japonicus yFS275
NP131|NG_131|II	gi|615399219|ref|XP_007579722.1|	0.022	47	Neofusicoccum parvum UCRNP2
NP434|NG_435|II	gi|924823472|gb|KOS21415.1|	0.029	54	Escovopsis weberi
NP454|NG_455|II	gi|630015431|ref|XP_007831701.1|	0.023	31	Pestalotiopsis fici W106-1
NP549|NG_550|II	gi|552913198|gb|ERZ98518.1|	0.029	77	Rhizophagus irregularis DAOM 181602;Rhizophagus irregularis DAOM 197198w
NP553|NG_554|II	gi|662506479|gb|KEQ64089.1|	1e-06	85	Aureobasidium melanogenum CBS 110374
NP553|NG_554|II	gi|630036299|ref|XP_007839334.1|	1e-06	82	Pestalotiopsis fici W106-1
NP553|NG_554|II	gi|700457588|gb|KGO47150.1|	2e-06	84	Penicillium expansum
NP553|NG_554|II	gi|700463277|gb|KGO52235.1|	2e-06	84	Penicillium expansum
NP553|NG_554|II	gi|918812871|ref|XP_013427310.1|	2e-06	83	Aureobasidium pullulans var. namibiae CBS 147.97
NP553|NG_554|II	gi|829123782|gb|KLO99400.1|	2e-06	65	Fusarium fujikuroi
NP553|NG_554|II	gi|517312973|emb|CCT65215.1|	2e-06	65	Fusarium fujikuroi;Fusarium fujikuroi IMI 58289
NP553|NG_554|II	gi|748550508|dbj|GAM43986.1|	4e-06	98	Talaromyces cellulolyticus
NP553|NG_554|II	gi|829115681|gb|KLO92032.1|	5e-06	65	Fusarium fujikuroi
NP553|NG_554|II	gi|729186979|emb|CEJ87121.1|	1e-05	80	Torrubiella hemipterigena
NP553|NG_554|II	gi|636762787|ref|XP_008083567.1|	1e-05	65	Glarea lozoyensis ATCC 20868
NP553|NG_554|II	gi|584145095|gb|EWG54366.1|	1e-05	82	Fusarium verticillioides 7600
NP553|NG_554|II	gi|590057683|gb|EXK85207.1|	2e-05	82	Fusarium oxysporum f. sp. raphani 54005
NP553|NG_554|II	gi|517313022|emb|CCT65260.1|	2e-05	82	Fusarium fujikuroi;Fusarium fujikuroi IMI 58289
NP553|NG_554|II	gi|477511190|gb|ENH63758.1|	2e-05	82	Fusarium oxysporum f. sp. cubense race 1
NP553|NG_554|II	gi|587753513|gb|EXA51229.1|	2e-05	82	Fusarium oxysporum f. sp. pisi HDV247
NP553|NG_554|II	gi|829115726|gb|KLO92077.1|	2e-05	82	Fusarium fujikuroi
NP553|NG_554|II	gi|342874770|gb|EGU76699.1|	2e-05	82	Fusarium oxysporum Fo5176
NP553|NG_554|II	gi|902745604|gb|KNB17171.1|	2e-05	79	Fusarium oxysporum f. sp. lycopersici 4287
NP553|NG_554|II	gi|682466082|gb|KFZ20540.1|	2e-05	75	Pseudogymnoascus pannorum VKM F-4519 (FW-2642)
NP553|NG_554|II	gi|591484525|gb|EXM14499.1|	2e-05	82	Fusarium oxysporum f. sp. vasinfectum 25433
NP553|NG_554|II	gi|591476256|gb|EXM07408.1|	2e-05	82	Fusarium oxysporum f. sp. cubense tropical race 4 54006
NP553|NG_554|II	gi|591435751|gb|EXL68665.1|	2e-05	82	Fusarium oxysporum f. sp. conglutinans race 2 54008
NP553|NG_554|II	gi|361131809|gb|EHL03444.1|	2e-05	65	Glarea lozoyensis 74030
NP553|NG_554|II	gi|587699340|gb|EWZ45945.1|	2e-05	82	Fusarium oxysporum Fo47;Fusarium oxysporum f. sp. radicis-lycopersici 26381
NP553|NG_554|II	gi|590041524|gb|EXK43382.1|	2e-05	82	Fusarium oxysporum f. sp. melonis 26406
NP553|NG_554|II	gi|475675671|gb|EMT72734.1|	2e-05	82	Fusarium oxysporum f. sp. cubense race 4
NP553|NG_554|II	gi|587725894|gb|EWZ97231.1|	2e-05	82	Fusarium oxysporum f. sp. lycopersici MN25
NP553|NG_554|II	gi|587677602|gb|EWY99930.1|	2e-05	82	Fusarium oxysporum FOSC 3-a
NP553|NG_554|II	gi|759262849|gb|KIW39376.1|	3e-05	74	Exophiala oligosperma
NP553|NG_554|II	gi|682432564|gb|KFY98078.1|	3e-05	75	Pseudogymnoascus pannorum VKM F-4518 (FW-2643)
NP553|NG_554|II	gi|936414618|gb|KPM43000.1|	3e-05	69	Neonectria ditissima
NP553|NG_554|II	gi|768695074|gb|KJJ24203.1|	3e-05	83	Penicillium solitum
NP553|NG_554|II	gi|685864817|ref|XP_009259441.1|	3e-05	82	Fusarium pseudograminearum CS3096
NP553|NG_554|II	gi|831333680|gb|KLT43231.1|	4e-05	86	Trichosporon oleaginosus
NP553|NG_554|II	gi|927755364|gb|KPA38907.1|	4e-05	82	Fusarium langsethiae
NP553|NG_554|II	gi|682448357|gb|KFZ08467.1|	4e-05	62	Pseudogymnoascus pannorum VKM F-4520 (FW-2644)
NP553|NG_554|II	gi|758210394|ref|XP_011327365.1|	5e-05	82	Fusarium graminearum;Fusarium graminearum PH-1
NP553|NG_554|II	gi|915041482|ref|XP_013256131.1|	5e-05	64	Exophiala aquamarina CBS 119918
NP553|NG_554|II	gi|682464369|gb|KFZ19456.1|	5e-05	75	Pseudogymnoascus pannorum VKM F-4519 (FW-2642)
NP553|NG_554|II	gi|596542669|gb|EYB23101.1|	5e-05	82	Fusarium graminearum
NP553|NG_554|II	gi|584144048|gb|EWG53346.1|	6e-05	65	Fusarium verticillioides 7600
NP553|NG_554|II	gi|682324571|gb|KFY26353.1|	8e-05	75	Pseudogymnoascus pannorum VKM F-4281 (FW-2241)
NP553|NG_554|II	gi|302888964|ref|XP_003043368.1|	9e-05	79	Nectria haematococca mpVI 77-13-4
NP553|NG_554|II	gi|255945605|ref|XP_002563570.1|	0.0001	79	Penicillium chrysogenum Wisconsin 54-1255
NP553|NG_554|II	gi|768696200|gb|KJJ25283.1|	0.0001	83	Penicillium solitum
NP553|NG_554|II	gi|682399999|gb|KFY77119.1|	0.0001	75	Pseudogymnoascus pannorum VKM F-103
NP553|NG_554|II	gi|615416521|ref|XP_007585248.1|	0.0001	74	Neofusicoccum parvum UCRNP2
NP553|NG_554|II	gi|259484922|tpe|CBF81557.1|	0.0001	77	Aspergillus nidulans FGSC A4
NP553|NG_554|II	gi|818166382|gb|KKP05831.1|	0.0001	73	Trichoderma harzianum
NP553|NG_554|II	gi|156058986|ref|XP_001595416.1|	0.0001	69	Sclerotinia sclerotiorum 1980 UF-70
NP553|NG_554|II	gi|662501483|gb|KEQ59114.1|	0.0002	64	Aureobasidium melanogenum CBS 110374
NP553|NG_554|II	gi|630040009|ref|XP_007840801.1|	0.0002	72	Pestalotiopsis fici W106-1
NP553|NG_554|II	gi|169603678|ref|XP_001795260.1|	0.0002	65	Phaeosphaeria nodorum SN15
NP553|NG_554|II	gi|597583259|ref|XP_007294686.1|	0.0002	67	Marssonina brunnea f. sp. 'multigermtubi' MB_m1
NP553|NG_554|II	gi|924891742|gb|KOS47689.1|	0.0002	79	Penicillium nordicum
NP553|NG_554|II	gi|573990475|ref|XP_006673158.1|	0.0002	75	Cordyceps militaris CM01
NP553|NG_554|II	gi|682425989|gb|KFY93451.1|	0.0002	62	Pseudogymnoascus pannorum VKM F-4518 (FW-2643)
NP553|NG_554|II	gi|154296608|ref|XP_001548734.1|	0.0002	78	Botryotinia fuckeliana B05.10;Botryotinia fuckeliana BcDW1
NP553|NG_554|II	gi|807745733|ref|XP_012177661.1|	0.0002	83	Fibroporia radiculosa
NP553|NG_554|II	gi|347828045|emb|CCD43742.1|	0.0002	78	Botryotinia fuckeliana T4
NP553|NG_554|II	gi|682319404|gb|KFY23268.1|	0.0003	91	Pseudogymnoascus pannorum VKM F-3775
NP553|NG_554|II	gi|821060467|gb|KKY15964.1|	0.0003	77	Diplodia seriata
NP553|NG_554|II	gi|818163289|gb|KKP03093.1|	0.0003	56	Trichoderma harzianum
NP553|NG_554|II	gi|627810719|ref|XP_007678707.1|	0.0003	65	Baudoinia compniacensis UAMH 10762
NP553|NG_554|II	gi|563296095|gb|ESZ96313.1|	0.0003	69	Sclerotinia borealis F-4157
NP553|NG_554|II	gi|398393238|ref|XP_003850078.1|	0.0003	55	Zymoseptoria tritici IPO323
NP553|NG_554|II	gi|751747984|gb|KIM96171.1|	0.0003	72	Oidiodendron maius Zn
NP553|NG_554|II	gi|525582966|gb|EPS29216.1|	0.0004	78	Penicillium oxalicum 114-2
NP553|NG_554|II	gi|748553837|dbj|GAM40716.1|	0.0004	73	Talaromyces cellulolyticus
NP553|NG_554|II	gi|589112537|ref|XP_006968291.1|	0.0004	56	Trichoderma reesei QM6a;Trichoderma reesei RUT C-30
NP553|NG_554|II	gi|927405847|ref|XP_013949505.1|	0.0004	56	Trichoderma virens Gv29-8
NP553|NG_554|II	gi|682454157|gb|KFZ12691.1|	0.0004	59	Pseudogymnoascus pannorum VKM F-4520 (FW-2644)
NP553|NG_554|II	gi|700449699|gb|KGO39840.1|	0.0005	63	Penicillium expansum
NP553|NG_554|II	gi|927427910|ref|XP_013959786.1|	0.0005	73	Trichoderma virens Gv29-8
NP553|NG_554|II	gi|859261508|emb|CEJ60978.1|	0.0005	56	Penicillium brasilianum
NP553|NG_554|II	gi|630038291|ref|XP_007840112.1|	0.0005	76	Pestalotiopsis fici W106-1
NP553|NG_554|II	gi|402218326|gb|EJT98403.1|	0.0005	73	N/A
NP553|NG_554|II	gi|927387995|ref|XP_013939843.1|	0.0006	72	Trichoderma atroviride IMI 206040
NP553|NG_554|II	gi|923151795|gb|KOP45784.1|	0.0006	67	Madurella mycetomatis
NP553|NG_554|II	gi|902270957|emb|CRL25578.1|	0.0007	73	Penicillium camemberti
NP553|NG_554|II	gi|636751615|ref|XP_008077981.1|	0.0007	72	Glarea lozoyensis ATCC 20868
NP553|NG_554|II	gi|628233729|ref|XP_007722440.1|	0.0008	65	Capronia coronata CBS 617.96
NP553|NG_554|II	gi|615419451|ref|XP_007586176.1|	0.0008	65	Neofusicoccum parvum UCRNP2
NP553|NG_554|II	gi|684171000|ref|XP_009159370.1|	0.0008	65	Exophiala dermatitidis NIH/UT8656
NP553|NG_554|II	gi|910299084|gb|KNG90593.1|	0.0008	79	Aspergillus nomius NRRL 13137
NP553|NG_554|II	gi|700454705|gb|KGO44511.1|	0.0009	73	Penicillium expansum
NP553|NG_554|II	gi|859261507|emb|CEJ60977.1|	0.0009	56	Penicillium brasilianum
NP553|NG_554|II	gi|302893909|ref|XP_003045835.1|	0.0009	77	Nectria haematococca mpVI 77-13-4
NP553|NG_554|II	gi|662528937|gb|KEQ86313.1|	0.0009	64	Aureobasidium pullulans EXF-150
NP553|NG_554|II	gi|631241630|ref|XP_007915737.1|	0.001	47	Togninia minima UCRPA7
NP553|NG_554|II	gi|759226956|gb|KIW03940.1|	0.001	64	Ochroconis gallopava
NP553|NG_554|II	gi|628310028|ref|XP_007735258.1|	0.001	65	Capronia epimyces CBS 606.96
NP553|NG_554|II	gi|759206980|gb|KIV84326.1|	0.001	65	Exophiala sideris
NP553|NG_554|II	gi|116208606|ref|XP_001230112.1|	0.001	67	Chaetomium globosum CBS 148.51
NP553|NG_554|II	gi|115384308|ref|XP_001208701.1|	0.001	73	Aspergillus terreus NIH2624
NP553|NG_554|II	gi|915701805|ref|XP_013346700.1|	0.001	64	Aureobasidium subglaciale EXF-2481
NP553|NG_554|II	gi|831335088|gb|KLT44627.1|	0.001	77	Trichosporon oleaginosus
NP553|NG_554|II	gi|914760937|gb|KOC14752.1|	0.001	83	Aspergillus flavus AF70
NP553|NG_554|II	gi|391864414|gb|EIT73710.1|	0.001	83	Aspergillus oryzae 3.042;Aspergillus oryzae 100-8
NP553|NG_554|II	gi|238508230|ref|XP_002385314.1|	0.001	83	Aspergillus flavus NRRL3357
NP553|NG_554|II	gi|631236916|ref|XP_007913380.1|	0.001	73	Togninia minima UCRPA7
NP553|NG_554|II	gi|759242496|gb|KIW19436.1|	0.001	66	Exophiala spinifera
NP553|NG_554|II	gi|910292877|gb|KNG84592.1|	0.001	83	Aspergillus nomius NRRL 13137
NP553|NG_554|II	gi|154315519|ref|XP_001557082.1|	0.001	65	Botryotinia fuckeliana B05.10
NP553|NG_554|II	gi|347839990|emb|CCD54562.1|	0.001	65	Botryotinia fuckeliana T4
NP553|NG_554|II	gi|472236245|gb|EMR81183.1|	0.002	65	Botryotinia fuckeliana BcDW1
NP553|NG_554|II	gi|685407757|ref|XP_009222737.1|	0.002	67	Gaeumannomyces graminis var. tritici R3-111a-1
NP553|NG_554|II	gi|630006593|ref|XP_007827282.1|	0.002	67	Pestalotiopsis fici W106-1
NP553|NG_554|II	gi|700458554|gb|KGO48041.1|	0.002	73	Penicillium expansum
NP553|NG_554|II	gi|700471536|gb|KGO59793.1|	0.002	73	Penicillium expansum
NP553|NG_554|II	gi|816334296|gb|KKK14657.1|	0.002	66	Aspergillus ochraceoroseus;Aspergillus rambellii
NP553|NG_554|II	gi|918819780|ref|XP_013428997.1|	0.002	65	Aureobasidium pullulans var. namibiae CBS 147.97
NP553|NG_554|II	gi|477534774|gb|ENH86302.1|	0.002	47	Colletotrichum orbiculare MAFF 240422
NP553|NG_554|II	gi|599151547|gb|EYE90975.1|	0.002	72	Aspergillus ruber CBS 135680
NP553|NG_554|II	gi|396470936|ref|XP_003838749.1|	0.002	83	Leptosphaeria maculans JN3
NP553|NG_554|II	gi|748528729|ref|XP_011128224.1|	0.002	47	Arthrobotrys oligospora ATCC 24927
NP553|NG_554|II	gi|134081658|emb|CAK46592.1|	0.002	47	Aspergillus niger
NP553|NG_554|II	gi|407922930|gb|EKG16020.1|	0.002	77	Macrophomina phaseolina MS6
NP553|NG_554|II	gi|517321299|emb|CCT71815.1|	0.002	67	Fusarium fujikuroi;Fusarium fujikuroi IMI 58289
NP553|NG_554|II	gi|829101767|gb|KLO78723.1|	0.002	67	Fusarium fujikuroi
NP553|NG_554|II	gi|902275478|emb|CRL21279.1|	0.002	73	Penicillium camemberti
NP553|NG_554|II	gi|761333074|gb|KIX94696.1|	0.002	65	Fonsecaea multimorphosa CBS 102226
NP553|NG_554|II	gi|770304669|gb|KJK62641.1|	0.002	79	Aspergillus parasiticus SU-1
NP553|NG_554|II	gi|238504570|ref|XP_002383516.1|	0.002	80	Aspergillus flavus NRRL3357
NP553|NG_554|II	gi|748550819|dbj|GAM43494.1|	0.002	67	Talaromyces cellulolyticus
NP553|NG_554|II	gi|317035053|ref|XP_001400980.2|	0.003	53	Aspergillus niger CBS 513.88
NP553|NG_554|II	gi|584144054|gb|EWG53352.1|	0.003	67	Fusarium verticillioides 7600
NP553|NG_554|II	gi|350639456|gb|EHA27810.1|	0.003	53	Aspergillus niger ATCC 1015
NP553|NG_554|II	gi|169764229|ref|XP_001816586.1|	0.003	79	Aspergillus oryzae RIB40;Aspergillus oryzae 3.042;Aspergillus oryzae 100-8
NP553|NG_554|II	gi|914753619|gb|KOC07784.1|	0.003	80	Aspergillus flavus AF70
NP553|NG_554|II	gi|358370342|dbj|GAA86953.1|	0.003	53	Aspergillus kawachii IFO 4308
NP553|NG_554|II	gi|930141634|ref|XP_014171223.1|	0.003	65	Grosmannia clavigera kw1407
NP553|NG_554|II	gi|930446605|gb|KPI45156.1|	0.003	56	Phialophora attae
NP553|NG_554|II	gi|682473213|gb|KFZ25239.1|	0.003	73	Pseudogymnoascus pannorum VKM F-4520 (FW-2644)
NP553|NG_554|II	gi|154296727|ref|XP_001548793.1|	0.003	56	Botryotinia fuckeliana B05.10
NP553|NG_554|II	gi|813208802|dbj|GAO50069.1|	0.004	65	Saitoella complicata NRRL Y-17804
NP553|NG_554|II	gi|671382110|ref|XP_008720944.1|	0.004	56	Cyphellophora europaea CBS 101466
NP553|NG_554|II	gi|615468425|ref|XP_007600232.1|	0.004	49	Colletotrichum fioriniae PJ7
NP553|NG_554|II	gi|821058487|gb|KKY14194.1|	0.004	67	Diplodia seriata
NP553|NG_554|II	gi|930445315|gb|KPI43868.1|	0.004	69	Phialophora attae
NP553|NG_554|II	gi|512187064|gb|EPE02847.1|	0.004	65	Ophiostoma piceae UAMH 11346
NP553|NG_554|II	gi|628294105|ref|XP_007757569.1|	0.004	55	Cladophialophora yegresii CBS 114405
NP553|NG_554|II	gi|530460079|gb|EQB43493.1|	0.004	47	Colletotrichum gloeosporioides Cg-14
NP553|NG_554|II	gi|402218343|gb|EJT98420.1|	0.004	73	N/A
NP553|NG_554|II	gi|682254863|gb|KFX85747.1|	0.004	69	Pseudogymnoascus pannorum VKM F-3557
NP553|NG_554|II	gi|821074358|gb|KKY29234.1|	0.004	70	Phaeomoniella chlamydospora
NP553|NG_554|II	gi|596728436|ref|XP_007287657.1|	0.004	47	Colletotrichum gloeosporioides Nara gc5
NP553|NG_554|II	gi|682352624|gb|KFY43576.1|	0.004	69	Pseudogymnoascus pannorum VKM F-4514 (FW-929);Pseudogymnoascus pannorum VKM F-4516 (FW-969)
NP553|NG_554|II	gi|682278462|gb|KFY00275.1|	0.004	69	Pseudogymnoascus pannorum VKM F-3808
NP553|NG_554|II	gi|682415604|gb|KFY86693.1|	0.004	69	Pseudogymnoascus pannorum VKM F-4518 (FW-2643)
NP553|NG_554|II	gi|682320827|gb|KFY24155.1|	0.004	69	Pseudogymnoascus pannorum VKM F-3775
NP553|NG_554|II	gi|759256395|gb|KIW33058.1|	0.004	65	Cladophialophora immunda
NP553|NG_554|II	gi|835891043|gb|KLU83188.1|	0.004	65	Magnaporthe poae ATCC 64411
NP553|NG_554|II	gi|380472415|emb|CCF46787.1|	0.004	49	Colletotrichum higginsianum
NP553|NG_554|II	gi|930412297|ref|XP_014180421.1|	0.005	98	Trichosporon asahii var. asahii CBS 2479;Trichosporon asahii var. asahii CBS 8904
NP553|NG_554|II	gi|682433266|gb|KFY98605.1|	0.005	69	Pseudogymnoascus pannorum VKM F-4517 (FW-2822)
NP553|NG_554|II	gi|915178802|ref|XP_013316144.1|	0.005	54	Exophiala xenobiotica
NP553|NG_554|II	gi|759310533|gb|KIW86904.1|	0.005	65	Cladophialophora bantiana CBS 173.52
NP553|NG_554|II	gi|682386886|gb|KFY68635.1|	0.005	69	Pseudogymnoascus pannorum VKM F-4515 (FW-2607)
NP553|NG_554|II	gi|759243091|gb|KIW20031.1|	0.005	54	Exophiala spinifera
NP553|NG_554|II	gi|821062306|gb|KKY17689.1|	0.005	48	Phaeomoniella chlamydospora
NP553|NG_554|II	gi|902278726|emb|CRL17409.1|	0.006	84	Penicillium camemberti
NP553|NG_554|II	gi|682399912|gb|KFY77057.1|	0.006	69	Pseudogymnoascus pannorum VKM F-103
NP553|NG_554|II	gi|671166570|ref|XP_008723751.1|	0.006	55	Cladophialophora carrionii CBS 160.54
NP553|NG_554|II	gi|761337938|gb|KIX98942.1|	0.006	56	Fonsecaea multimorphosa CBS 102226
NP553|NG_554|II	gi|682386473|gb|KFY68324.1|	0.006	73	Pseudogymnoascus pannorum VKM F-4515 (FW-2607)
NP553|NG_554|II	gi|813206378|dbj|GAO52231.1|	0.006	56	Saitoella complicata NRRL Y-17804
NP553|NG_554|II	gi|634354484|gb|KDE09503.1|	0.006	64	Microbotryum violaceum p1A1 Lamole
NP553|NG_554|II	gi|682432521|gb|KFY98039.1|	0.006	73	Pseudogymnoascus pannorum VKM F-4517 (FW-2822)
NP553|NG_554|II	gi|628319273|ref|XP_007736539.1|	0.006	73	Capronia epimyces CBS 606.96
NP553|NG_554|II	gi|629654541|ref|XP_007792313.1|	0.006	79	Eutypa lata UCREL1
NP553|NG_554|II	gi|759290076|gb|KIW66494.1|	0.006	55	Capronia semiimmersa
NP553|NG_554|II	gi|452840193|gb|EME42131.1|	0.006	79	Dothistroma septosporum NZE10
NP553|NG_554|II	gi|682447956|gb|KFZ08152.1|	0.006	69	Pseudogymnoascus pannorum VKM F-4519 (FW-2642)
NP553|NG_554|II	gi|915108995|ref|XP_013287183.1|	0.007	61	Fonsecaea pedrosoi CBS 271.37
NP553|NG_554|II	gi|821061025|gb|KKY16490.1|	0.007	67	Diplodia seriata
NP553|NG_554|II	gi|472583087|gb|EMS20741.1|	0.007	57	Rhodosporidium toruloides;Rhodosporidium toruloides NP11
NP553|NG_554|II	gi|671144012|ref|XP_008711452.1|	0.007	66	Cyphellophora europaea CBS 101466
NP553|NG_554|II	gi|695112818|gb|KGK39359.1|	0.007	82	Pichia kudriavzevii
NP553|NG_554|II	gi|563289190|gb|ESZ89986.1|	0.007	56	Sclerotinia borealis F-4157
NP553|NG_554|II	gi|591469122|gb|EXM00449.1|	0.007	67	Fusarium oxysporum f. sp. cubense tropical race 4 54006
NP553|NG_554|II	gi|587734773|gb|EXA32489.1|	0.007	67	Fusarium oxysporum f. sp. pisi HDV247;Fusarium oxysporum f. sp. vasinfectum 25433;Fusarium oxysporum f. sp. raphani 54005
NP553|NG_554|II	gi|587684875|gb|EWZ31480.1|	0.007	67	Fusarium oxysporum Fo47
NP553|NG_554|II	gi|682355762|gb|KFY45649.1|	0.007	69	Pseudogymnoascus pannorum VKM F-4513 (FW-928)
NP553|NG_554|II	gi|682306878|gb|KFY16468.1|	0.007	69	Pseudogymnoascus pannorum VKM F-4246
NP553|NG_554|II	gi|915093744|ref|XP_013284711.1|	0.007	65	Fonsecaea pedrosoi CBS 271.37
NP553|NG_554|II	gi|587722724|gb|EWZ94061.1|	0.007	67	Fusarium oxysporum f. sp. lycopersici MN25
NP553|NG_554|II	gi|590025348|gb|EXK27206.1|	0.007	67	Fusarium oxysporum f. sp. lycopersici 4287;Fusarium oxysporum f. sp. melonis 26406
NP553|NG_554|II	gi|475676989|gb|EMT74006.1|	0.007	67	Fusarium oxysporum f. sp. cubense race 4
NP553|NG_554|II	gi|682317307|gb|KFY21907.1|	0.007	69	Pseudogymnoascus pannorum VKM F-4281 (FW-2241)
NP553|NG_554|II	gi|347836028|emb|CCD50600.1|	0.008	56	Botryotinia fuckeliana T4;Botryotinia fuckeliana BcDW1
NP553|NG_554|II	gi|591405714|gb|EXL40851.1|	0.008	67	Fusarium oxysporum f. sp. radicis-lycopersici 26381
NP553|NG_554|II	gi|477522907|gb|ENH74949.1|	0.008	67	Fusarium oxysporum FOSC 3-a;Fusarium oxysporum f. sp. cubense race 1
NP553|NG_554|II	gi|115398662|ref|XP_001214920.1|	0.008	80	Aspergillus terreus NIH2624
NP553|NG_554|II	gi|599159807|gb|EYE98791.1|	0.008	69	Aspergillus ruber CBS 135680
NP553|NG_554|II	gi|169784592|ref|XP_001826757.1|	0.008	83	Aspergillus oryzae RIB40
NP553|NG_554|II	gi|682399794|gb|KFY76961.1|	0.008	72	Pseudogymnoascus pannorum VKM F-103
NP553|NG_554|II	gi|628300456|ref|XP_007759327.1|	0.009	61	Cladophialophora yegresii CBS 114405
NP553|NG_554|II	gi|682448117|gb|KFZ08279.1|	0.009	72	Pseudogymnoascus pannorum VKM F-4519 (FW-2642)
NP553|NG_554|II	gi|930441427|gb|KPI39989.1|	0.009	72	Phialophora attae
NP553|NG_554|II	gi|452841756|gb|EME43693.1|	0.009	65	Dothistroma septosporum NZE10
NP553|NG_554|II	gi|915138874|ref|XP_013325562.1|	0.009	56	Rasamsonia emersonii CBS 393.64
NP553|NG_554|II	gi|628278893|ref|XP_007731908.1|	0.009	67	Capronia epimyces CBS 606.96
NP553|NG_554|II	gi|859263191|emb|CEJ57946.1|	0.01	80	Penicillium brasilianum
NP553|NG_554|II	gi|634354483|gb|KDE09502.1|	0.01	64	Microbotryum violaceum p1A1 Lamole
NP553|NG_554|II	gi|671170136|ref|XP_008725534.1|	0.01	61	Cladophialophora carrionii CBS 160.54
NP553|NG_554|II	gi|590026642|gb|EXK28500.1|	0.01	66	Fusarium oxysporum f. sp. melonis 26406
NP553|NG_554|II	gi|671159476|ref|XP_008718129.1|	0.01	56	Cyphellophora europaea CBS 101466
NP553|NG_554|II	gi|682429686|gb|KFY95992.1|	0.011	76	Pseudogymnoascus pannorum VKM F-4517 (FW-2822)
NP553|NG_554|II	gi|729183534|emb|CEJ92464.1|	0.011	47	Torrubiella hemipterigena
NP553|NG_554|II	gi|821083141|gb|KKY36574.1|	0.011	64	Diaporthe ampelina
NP553|NG_554|II	gi|628325483|ref|XP_007737654.1|	0.011	56	Capronia epimyces CBS 606.96
NP553|NG_554|II	gi|628310945|ref|XP_007741091.1|	0.011	56	Cladophialophora psammophila CBS 110553
NP553|NG_554|II	gi|759252874|gb|KIW29538.1|	0.011	75	Cladophialophora immunda
NP553|NG_554|II	gi|816187216|emb|CRG90498.1|	0.012	56	Talaromyces islandicus
NP553|NG_554|II	gi|590021625|gb|EXK23483.1|	0.012	47	Fusarium oxysporum f. sp. lycopersici 4287;Fusarium oxysporum f. sp. melonis 26406
NP553|NG_554|II	gi|598009845|ref|XP_007370880.1|	0.013	70	Dichomitus squalens LYAD-421 SS1
NP553|NG_554|II	gi|591443936|gb|EXL76482.1|	0.013	67	Fusarium oxysporum f. sp. conglutinans race 2 54008
NP553|NG_554|II	gi|751749592|gb|KIM97775.1|	0.013	56	Oidiodendron maius Zn
NP553|NG_554|II	gi|759246319|gb|KIW22988.1|	0.013	56	Cladophialophora immunda
NP553|NG_554|II	gi|596543899|gb|EYB24134.1|	0.013	51	Fusarium graminearum
NP553|NG_554|II	gi|630018445|ref|XP_007833071.1|	0.014	56	Pestalotiopsis fici W106-1
NP553|NG_554|II	gi|910296333|gb|KNG87916.1|	0.014	65	Aspergillus nomius NRRL 13137
NP553|NG_554|II	gi|407924685|gb|EKG17717.1|	0.014	71	Macrophomina phaseolina MS6
NP553|NG_554|II	gi|930137462|ref|XP_014169137.1|	0.014	83	Grosmannia clavigera kw1407
NP553|NG_554|II	gi|472583086|gb|EMS20740.1|	0.014	43	Rhodosporidium toruloides;Rhodosporidium toruloides NP11
NP553|NG_554|II	gi|920638308|gb|KOM19519.1|	0.015	65	Ophiocordyceps unilateralis
NP553|NG_554|II	gi|512187672|gb|EPE03449.1|	0.015	75	Ophiostoma piceae UAMH 11346
NP553|NG_554|II	gi|758186597|ref|XP_011315679.1|	0.015	51	Fusarium graminearum;Fusarium graminearum PH-1
NP553|NG_554|II	gi|743628199|gb|KID59668.1|	0.016	88	Metarhizium anisopliae ARSEF 549
NP553|NG_554|II	gi|67518037|ref|XP_658789.1|	0.016	78	Aspergillus nidulans FGSC A4
NP553|NG_554|II	gi|255933614|ref|XP_002558186.1|	0.017	84	Penicillium chrysogenum Wisconsin 54-1255
NP553|NG_554|II	gi|859263687|emb|CEJ58442.1|	0.017	107	Penicillium brasilianum
NP553|NG_554|II	gi|930442382|gb|KPI40942.1|	0.018	66	Phialophora attae
NP553|NG_554|II	gi|671381886|ref|XP_008720832.1|	0.018	74	Cyphellophora europaea CBS 101466
NP553|NG_554|II	gi|631239116|ref|XP_007914480.1|	0.018	56	Togninia minima UCRPA7
NP553|NG_554|II	gi|924889186|gb|KOS45168.1|	0.019	78	Penicillium nordicum
NP553|NG_554|II	gi|821066153|gb|KKY21349.1|	0.019	57	Phaeomoniella chlamydospora
NP553|NG_554|II	gi|759288797|gb|KIW65290.1|	0.019	61	Capronia semiimmersa
NP553|NG_554|II	gi|169786341|ref|XP_001827631.1|	0.02	69	Aspergillus oryzae RIB40
NP553|NG_554|II	gi|759271234|gb|KIW47752.1|	0.021	56	Exophiala oligosperma
NP553|NG_554|II	gi|759240159|gb|KIW17102.1|	0.021	77	Exophiala spinifera
NP553|NG_554|II	gi|156060179|ref|XP_001596012.1|	0.022	67	Sclerotinia sclerotiorum 1980 UF-70
NP553|NG_554|II	gi|315040902|ref|XP_003169828.1|	0.023	77	Arthroderma gypseum CBS 118893
NP553|NG_554|II	gi|770410193|gb|KJK94987.1|	0.023	88	Metarhizium anisopliae BRIP 53284
NP553|NG_554|II	gi|768693017|gb|KJJ22308.1|	0.023	85	Penicillium solitum
NP553|NG_554|II	gi|915083490|ref|XP_013262185.1|	0.024	54	Exophiala aquamarina CBS 119918
NP553|NG_554|II	gi|770390281|gb|KJK76276.1|	0.024	88	Metarhizium anisopliae BRIP 53293
NP553|NG_554|II	gi|591485020|gb|EXM14942.1|	0.025	66	Fusarium oxysporum f. sp. vasinfectum 25433
NP553|NG_554|II	gi|770309582|gb|KJK66635.1|	0.025	76	Aspergillus parasiticus SU-1
NP553|NG_554|II	gi|296813597|ref|XP_002847136.1|	0.026	56	Arthroderma otae CBS 113480
NP553|NG_554|II	gi|821067326|gb|KKY22488.1|	0.026	72	Diplodia seriata
NP553|NG_554|II	gi|591459726|gb|EXL91350.1|	0.027	66	Fusarium oxysporum f. sp. cubense tropical race 4 54006
NP553|NG_554|II	gi|631385496|ref|XP_007927128.1|	0.028	54	Pseudocercospora fijiensis CIRAD86
NP553|NG_554|II	gi|302889712|ref|XP_003043741.1|	0.028	63	Nectria haematococca mpVI 77-13-4
NP553|NG_554|II	gi|849273539|dbj|GAO84166.1|	0.028	69	Neosartorya udagawae
NP553|NG_554|II	gi|759311353|gb|KIW87717.1|	0.028	56	Cladophialophora bantiana CBS 173.52
NP553|NG_554|II	gi|667654593|ref|XP_008599128.1|	0.03	66	Beauveria bassiana ARSEF 2860
NP553|NG_554|II	gi|759242955|gb|KIW19895.1|	0.03	47	Exophiala spinifera
NP553|NG_554|II	gi|679994928|gb|KFX47416.1|	0.03	56	Talaromyces marneffei PM1
NP553|NG_554|II	gi|915105652|ref|XP_013265433.1|	0.03	64	Exophiala aquamarina CBS 119918
NP553|NG_554|II	gi|302663813|ref|XP_003023544.1|	0.03	77	Trichophyton verrucosum HKI 0517
NP553|NG_554|II	gi|742075856|gb|KIA75774.1|	0.031	73	Aspergillus ustus
NP553|NG_554|II	gi|584145627|gb|EWG54894.1|	0.032	66	Fusarium verticillioides 7600
NP553|NG_554|II	gi|628246066|ref|XP_007724446.1|	0.033	56	Capronia coronata CBS 617.96
NP553|NG_554|II	gi|902271217|emb|CRL25225.1|	0.033	56	Penicillium camemberti
NP553|NG_554|II	gi|682274876|gb|KFX97690.1|	0.033	72	Pseudogymnoascus pannorum VKM F-3808
NP553|NG_554|II	gi|768683518|gb|KJJ13368.1|	0.033	96	Penicillium solitum
NP553|NG_554|II	gi|682260049|gb|KFX87987.1|	0.033	72	Pseudogymnoascus pannorum VKM F-3557
NP553|NG_554|II	gi|768693855|gb|KJJ23104.1|	0.034	56	Penicillium solitum
NP553|NG_554|II	gi|367047597|ref|XP_003654178.1|	0.034	71	Thielavia terrestris NRRL 8126
NP553|NG_554|II	gi|902266995|emb|CRL29576.1|	0.035	103	Penicillium camemberti
NP553|NG_554|II	gi|666870286|gb|KEZ46389.1|	0.035	80	Pseudallescheria apiosperma
NP553|NG_554|II	gi|550807072|gb|ERS98986.1|	0.036	36	Sporothrix schenckii ATCC 58251
NP553|NG_554|II	gi|302681019|ref|XP_003030191.1|	0.036	74	Schizophyllum commune H4-8
NP553|NG_554|II	gi|748543726|gb|KIH94028.1|	0.037	36	Sporothrix brasiliensis 5110
NP553|NG_554|II	gi|452845616|gb|EME47549.1|	0.037	63	Dothistroma septosporum NZE10
NP553|NG_554|II	gi|780592609|gb|KJR83368.1|	0.037	36	Sporothrix schenckii 1099-18
NP553|NG_554|II	gi|632915158|gb|KDB14765.1|	0.037	66	Villosiclava virens
NP553|NG_554|II	gi|119480629|ref|XP_001260343.1|	0.037	56	Neosartorya fischeri NRRL 181
NP553|NG_554|II	gi|908387065|gb|KND87788.1|	0.037	66	Tolypocladium ophioglossoides CBS 100239
NP553|NG_554|II	gi|189192038|ref|XP_001932358.1|	0.038	61	Pyrenophora tritici-repentis Pt-1C-BFP
NP553|NG_554|II	gi|425766536|gb|EKV05145.1|	0.038	56	Penicillium digitatum PHI26;Penicillium digitatum Pd1
NP553|NG_554|II	gi|584415315|emb|CDM27008.1|	0.039	56	Penicillium roqueforti FM164
NP553|NG_554|II	gi|255935703|ref|XP_002558878.1|	0.04	56	Penicillium chrysogenum Wisconsin 54-1255
NP553|NG_554|II	gi|751758585|gb|KIN06758.1|	0.04	54	Oidiodendron maius Zn
NP553|NG_554|II	gi|640922784|gb|KDN67003.1|	0.042	36	Colletotrichum sublineola
NP553|NG_554|II	gi|759237908|gb|KIW14853.1|	0.043	74	Exophiala spinifera
NP553|NG_554|II	gi|909986678|gb|KNG44325.1|	0.043	61	Stemphylium lycopersici
NP553|NG_554|II	gi|915090595|ref|XP_013276186.1|	0.043	56	Rhinocladiella mackenziei CBS 650.93
NP553|NG_554|II	gi|70998731|ref|XP_754087.1|	0.044	69	Aspergillus fumigatus Af293
NP553|NG_554|II	gi|700472477|gb|KGO60653.1|	0.045	54	Penicillium expansum
NP553|NG_554|II	gi|700452452|gb|KGO42430.1|	0.045	54	Penicillium expansum
NP553|NG_554|II	gi|636755903|ref|XP_008080125.1|	0.045	56	Glarea lozoyensis ATCC 20868
NP553|NG_554|II	gi|759265969|gb|KIW42491.1|	0.045	95	Exophiala oligosperma
NP553|NG_554|II	gi|700449434|gb|KGO39602.1|	0.046	78	Penicillium expansum
NP553|NG_554|II	gi|821080349|gb|KKY33893.1|	0.047	71	Diaporthe ampelina
NP553|NG_554|II	gi|700474617|gb|KGO62601.1|	0.047	78	Penicillium expansum
NP553|NG_554|II	gi|700488629|gb|KGO73857.1|	0.048	56	Penicillium italicum
NP553|NG_554|II	gi|527297075|gb|EPS97896.1|	0.049	67	Fomitopsis pinicola FP-58527 SS1
NP553|NG_554|II	gi|818162031|gb|KKP02015.1|	0.049	57	Trichoderma harzianum
NP553|NG_554|II	gi|748558896|dbj|GAM35646.1|	0.05	56	Talaromyces cellulolyticus
NP568|NG_569|III	gi|759221485|gb|KIV98558.1|	4e-32	218	Ochroconis gallopava
NP568|NG_569|III	gi|691790483|emb|CDO73846.1|	6e-29	227	Trametes cinnabarina
NP568|NG_569|III	gi|682308465|gb|KFY17374.1|	1e-28	223	Pseudogymnoascus pannorum VKM F-3775
NP568|NG_569|III	gi|691787406|emb|CDO76068.1|	3e-28	220	Trametes cinnabarina
NP568|NG_569|III	gi|915127959|ref|XP_013323266.1|	6e-28	224	Rasamsonia emersonii CBS 393.64
NP568|NG_569|III	gi|691783972|emb|CDO78159.1|	1e-27	227	Trametes cinnabarina
NP568|NG_569|III	gi|315039287|ref|XP_003169023.1|	2e-27	226	Arthroderma gypseum CBS 118893
NP568|NG_569|III	gi|270356908|gb|ACZ80693.1|	2e-26	243	Filobasidiella depauperata
NP568|NG_569|III	gi|154274259|ref|XP_001537981.1|	3e-26	220	Ajellomyces capsulatus NAm1
NP568|NG_569|III	gi|576980834|gb|EUC53577.1|	4e-26	226	Rhizoctonia solani AG-3 Rhs1AP;Rhizoctonia solani 123E
NP568|NG_569|III	gi|154286146|ref|XP_001543868.1|	5e-26	220	Ajellomyces capsulatus NAm1
NP568|NG_569|III	gi|682438736|gb|KFZ02674.1|	5e-26	231	Pseudogymnoascus pannorum VKM F-4519 (FW-2642)
NP568|NG_569|III	gi|154271798|ref|XP_001536752.1|	5e-26	220	Ajellomyces capsulatus NAm1
NP568|NG_569|III	gi|315042437|ref|XP_003170595.1|	5e-26	226	Arthroderma gypseum CBS 118893
NP568|NG_569|III	gi|154284878|ref|XP_001543234.1|	2e-25	227	Ajellomyces capsulatus NAm1
NP568|NG_569|III	gi|154272636|ref|XP_001537170.1|	2e-25	227	Ajellomyces capsulatus NAm1
NP568|NG_569|III	gi|154275790|ref|XP_001538740.1|	2e-25	227	Ajellomyces capsulatus NAm1
NP568|NG_569|III	gi|154271534|ref|XP_001536620.1|	2e-25	227	Ajellomyces capsulatus NAm1
NP568|NG_569|III	gi|154285338|ref|XP_001543464.1|	2e-25	227	Ajellomyces capsulatus NAm1
NP568|NG_569|III	gi|215465503|gb|EEB96124.1|	4e-25	218	Moniliophthora perniciosa FA553
NP568|NG_569|III	gi|154287242|ref|XP_001544416.1|	4e-25	227	Ajellomyces capsulatus NAm1
NP568|NG_569|III	gi|154271288|ref|XP_001536497.1|	6e-25	227	Ajellomyces capsulatus NAm1
NP568|NG_569|III	gi|909987656|gb|KNG45260.1|	6e-25	234	Stemphylium lycopersici
NP568|NG_569|III	gi|388855346|emb|CCF51010.1|	7e-25	230	Ustilago hordei
NP568|NG_569|III	gi|630207691|ref|XP_007853959.1|	8e-25	224	Moniliophthora roreri MCA 2997
NP568|NG_569|III	gi|820657211|emb|CED84441.1|	1e-24	218	Xanthophyllomyces dendrorhous
NP568|NG_569|III	gi|380086578|emb|CCC05694.1|	2e-24	224	Sordaria macrospora k-hell
NP568|NG_569|III	gi|630203026|ref|XP_007852436.1|	2e-24	231	Moniliophthora roreri MCA 2997
NP568|NG_569|III	gi|630225537|ref|XP_007859770.1|	3e-24	231	Moniliophthora roreri MCA 2997
NP568|NG_569|III	gi|660955097|gb|KEP45283.1|	3e-24	214	Rhizoctonia solani 123E
NP568|NG_569|III	gi|630217231|ref|XP_007857051.1|	3e-24	224	Moniliophthora roreri MCA 2997
NP568|NG_569|III	gi|630217431|ref|XP_007857116.1|	4e-24	223	Moniliophthora roreri MCA 2997
NP568|NG_569|III	gi|630220098|ref|XP_007857981.1|	4e-24	228	Moniliophthora roreri MCA 2997
NP568|NG_569|III	gi|425779964|gb|EKV17987.1|	4e-24	204	Penicillium digitatum PHI26
NP568|NG_569|III	gi|425779965|gb|EKV17988.1|	4e-24	204	Penicillium digitatum PHI26
NP568|NG_569|III	gi|83766359|dbj|BAE56502.1|	6e-24	223	Aspergillus oryzae RIB40
NP568|NG_569|III	gi|630220479|ref|XP_007858107.1|	1e-23	222	Moniliophthora roreri MCA 2997
NP568|NG_569|III	gi|758362416|emb|CEP15175.1|	1e-23	227	Parasitella parasitica
NP568|NG_569|III	gi|630218840|ref|XP_007857574.1|	1e-23	231	Moniliophthora roreri MCA 2997
NP568|NG_569|III	gi|215449192|gb|EEB89080.1|	1e-23	218	Moniliophthora perniciosa FA553
NP568|NG_569|III	gi|317138875|ref|XP_003189096.1|	2e-23	223	Aspergillus oryzae RIB40
NP568|NG_569|III	gi|317141366|ref|XP_001818504.2|	2e-23	223	Aspergillus oryzae RIB40
NP568|NG_569|III	gi|342885723|gb|EGU85703.1|	2e-23	232	Fusarium oxysporum Fo5176
NP568|NG_569|III	gi|630225386|ref|XP_007859721.1|	2e-23	231	Moniliophthora roreri MCA 2997
NP568|NG_569|III	gi|154275976|ref|XP_001538833.1|	2e-23	238	Ajellomyces capsulatus NAm1
NP568|NG_569|III	gi|154277048|ref|XP_001539369.1|	3e-23	234	Ajellomyces capsulatus NAm1
NP568|NG_569|III	gi|154280837|ref|XP_001541231.1|	3e-23	234	Ajellomyces capsulatus NAm1
NP568|NG_569|III	gi|630225487|ref|XP_007859754.1|	3e-23	231	Moniliophthora roreri MCA 2997
NP568|NG_569|III	gi|630225515|ref|XP_007859763.1|	3e-23	231	Moniliophthora roreri MCA 2997
NP568|NG_569|III	gi|154283813|ref|XP_001542702.1|	4e-23	234	Ajellomyces capsulatus NAm1
NP568|NG_569|III	gi|342877824|gb|EGU79254.1|	4e-23	212	Fusarium oxysporum Fo5176
NP568|NG_569|III	gi|336371484|gb|EGN99823.1|	4e-23	227	Serpula lacrymans var. lacrymans S7.3
NP568|NG_569|III	gi|388854961|emb|CCF51464.1|	5e-23	219	Ustilago hordei
NP568|NG_569|III	gi|83753113|gb|AAR29046.2|	5e-23	223	Aspergillus flavus
NP568|NG_569|III	gi|2133292|pir||S60179	6e-23	233	Fusarium oxysporum
NP568|NG_569|III	gi|752282576|dbj|GAM82720.1|	7e-23	226	fungal sp. No.11243
NP568|NG_569|III	gi|630216137|ref|XP_007856698.1|	7e-23	228	Moniliophthora roreri MCA 2997
NP568|NG_569|III	gi|630188621|ref|XP_007847778.1|	8e-23	226	Moniliophthora roreri MCA 2997
NP568|NG_569|III	gi|329351119|gb|AEB91352.1|	8e-23	224	Verticillium dahliae VdLs.17
NP568|NG_569|III	gi|242826075|ref|XP_002488568.1|	8e-23	223	Talaromyces stipitatus ATCC 10500
NP568|NG_569|III	gi|475669027|gb|EMT66812.1|	9e-23	232	Fusarium oxysporum f. sp. cubense race 4
NP568|NG_569|III	gi|388854836|emb|CCF51517.1|	1e-22	223	Ustilago hordei
NP568|NG_569|III	gi|154283547|ref|XP_001542569.1|	1e-22	246	Ajellomyces capsulatus NAm1
NP568|NG_569|III	gi|530459418|gb|EQB43071.1|	1e-22	226	Colletotrichum gloeosporioides Cg-14
NP568|NG_569|III	gi|388856675|emb|CCF49792.1|	1e-22	223	Ustilago hordei
NP568|NG_569|III	gi|154269862|ref|XP_001535830.1|	1e-22	252	Ajellomyces capsulatus NAm1
NP568|NG_569|III	gi|154277304|ref|XP_001539493.1|	1e-22	246	Ajellomyces capsulatus NAm1
NP568|NG_569|III	gi|215459079|gb|EEB93608.1|	1e-22	218	Moniliophthora perniciosa FA553
NP568|NG_569|III	gi|630221966|ref|XP_007858603.1|	1e-22	224	Moniliophthora roreri MCA 2997
NP568|NG_569|III	gi|388856424|emb|CCF49973.1|	2e-22	223	Ustilago hordei
NP568|NG_569|III	gi|751830666|emb|CEL56723.1|	2e-22	210	Rhizoctonia solani AG-1 IB
NP568|NG_569|III	gi|242794481|ref|XP_002482383.1|	2e-22	223	Talaromyces stipitatus ATCC 10500
NP568|NG_569|III	gi|630225271|ref|XP_007859683.1|	2e-22	231	Moniliophthora roreri MCA 2997
NP568|NG_569|III	gi|630222856|ref|XP_007858894.1|	2e-22	226	Moniliophthora roreri MCA 2997
NP568|NG_569|III	gi|154281591|ref|XP_001541608.1|	3e-22	246	Ajellomyces capsulatus NAm1
NP568|NG_569|III	gi|336255829|ref|XP_003343307.1|	3e-22	213	Sordaria macrospora k-hell
NP568|NG_569|III	gi|471868400|emb|CCO37435.1|	3e-22	210	Rhizoctonia solani AG-1 IB
NP568|NG_569|III	gi|388856666|emb|CCF49783.1|	3e-22	226	Ustilago hordei
NP568|NG_569|III	gi|154272652|ref|XP_001537178.1|	3e-22	246	Ajellomyces capsulatus NAm1
NP568|NG_569|III	gi|630212501|ref|XP_007855519.1|	3e-22	225	Moniliophthora roreri MCA 2997
NP568|NG_569|III	gi|10946132|gb|AAG24792.1|AF264028_2	3e-22	226	Colletotrichum gloeosporioides
NP568|NG_569|III	gi|154284984|ref|XP_001543287.1|	4e-22	246	Ajellomyces capsulatus NAm1
NP568|NG_569|III	gi|594718135|gb|EXV01030.1|	4e-22	215	Metarhizium robertsii
NP568|NG_569|III	gi|594717226|gb|EXV00126.1|	4e-22	215	Metarhizium robertsii
NP568|NG_569|III	gi|215448657|gb|EEB88772.1|	4e-22	218	Moniliophthora perniciosa FA553
NP568|NG_569|III	gi|399164114|emb|CCE34914.1|	4e-22	216	Claviceps purpurea 20.1
NP568|NG_569|III	gi|154285268|ref|XP_001543429.1|	4e-22	246	Ajellomyces capsulatus NAm1
NP568|NG_569|III	gi|215448768|gb|EEB88840.1|	4e-22	218	Moniliophthora perniciosa FA553
NP568|NG_569|III	gi|154278904|ref|XP_001540265.1|	4e-22	246	Ajellomyces capsulatus NAm1
NP568|NG_569|III	gi|471874993|emb|CCO35916.1|	4e-22	225	Rhizoctonia solani AG-1 IB
NP568|NG_569|III	gi|329351122|gb|AEB91354.1|	4e-22	226	Verticillium dahliae VdLs.17
NP568|NG_569|III	gi|630220719|ref|XP_007858184.1|	4e-22	224	Moniliophthora roreri MCA 2997
NP568|NG_569|III	gi|758354118|dbj|GAN03854.1|	4e-22	215	Mucor ambiguus
NP568|NG_569|III	gi|630223055|ref|XP_007858960.1|	4e-22	226	Moniliophthora roreri MCA 2997
NP568|NG_569|III	gi|594712692|gb|EXU95646.1|	5e-22	215	Metarhizium robertsii
NP568|NG_569|III	gi|154287236|ref|XP_001544413.1|	5e-22	252	Ajellomyces capsulatus NAm1
NP568|NG_569|III	gi|154288188|ref|XP_001544889.1|	5e-22	246	Ajellomyces capsulatus NAm1
NP568|NG_569|III	gi|630221830|ref|XP_007858556.1|	6e-22	209	Moniliophthora roreri MCA 2997
NP568|NG_569|III	gi|475676443|gb|EMT73474.1|	6e-22	225	Fusarium oxysporum f. sp. cubense race 4
NP568|NG_569|III	gi|156065843|ref|XP_001598843.1|	7e-22	229	Sclerotinia sclerotiorum 1980 UF-70
NP568|NG_569|III	gi|471882806|emb|CCO34169.1|	8e-22	213	Rhizoctonia solani AG-1 IB
NP568|NG_569|III	gi|691787080|emb|CDO76282.1|	8e-22	227	Trametes cinnabarina
NP568|NG_569|III	gi|388858645|emb|CCF48482.1|	8e-22	226	Ustilago hordei
NP568|NG_569|III	gi|630221724|ref|XP_007858521.1|	9e-22	211	Moniliophthora roreri MCA 2997
NP568|NG_569|III	gi|589269986|ref|XP_007000723.1|	1e-21	217	Tremella mesenterica DSM 1558
NP568|NG_569|III	gi|399164217|emb|CCE34844.1|	1e-21	215	Claviceps purpurea 20.1
NP568|NG_569|III	gi|589273096|ref|XP_007002278.1|	1e-21	217	Tremella mesenterica DSM 1558
NP568|NG_569|III	gi|630223249|ref|XP_007859023.1|	1e-21	226	Moniliophthora roreri MCA 2997
NP568|NG_569|III	gi|751831480|emb|CEL53165.1|	1e-21	211	Rhizoctonia solani AG-1 IB
NP568|NG_569|III	gi|630221144|ref|XP_007858327.1|	2e-21	226	Moniliophthora roreri MCA 2997
NP568|NG_569|III	gi|154282097|ref|XP_001541861.1|	2e-21	193	Ajellomyces capsulatus NAm1
NP568|NG_569|III	gi|752359414|gb|KIO17550.1|	2e-21	217	Tulasnella calospora MUT 4182
NP568|NG_569|III	gi|336270820|ref|XP_003350169.1|	2e-21	213	Sordaria macrospora k-hell
NP568|NG_569|III	gi|589270168|ref|XP_007000814.1|	2e-21	217	Tremella mesenterica DSM 1558
NP568|NG_569|III	gi|630192628|ref|XP_007849062.1|	2e-21	225	Moniliophthora roreri MCA 2997
NP568|NG_569|III	gi|682432403|gb|KFY97961.1|	3e-21	191	Pseudogymnoascus pannorum VKM F-4517 (FW-2822)
NP568|NG_569|III	gi|751171924|gb|KIL57987.1|	3e-21	229	Amanita muscaria Koide BX008
NP568|NG_569|III	gi|459367301|gb|EMG46361.1|	3e-21	218	Candida maltosa Xu316
NP568|NG_569|III	gi|215448795|gb|EEB88858.1|	3e-21	200	Moniliophthora perniciosa FA553
NP568|NG_569|III	gi|630225380|ref|XP_007859719.1|	3e-21	231	Moniliophthora roreri MCA 2997
NP568|NG_569|III	gi|336241554|ref|XP_003342852.1|	3e-21	213	Sordaria macrospora k-hell
NP568|NG_569|III	gi|752359588|gb|KIO17706.1|	3e-21	217	Tulasnella calospora MUT 4182
NP568|NG_569|III	gi|589270000|ref|XP_007000730.1|	4e-21	217	Tremella mesenterica DSM 1558
NP568|NG_569|III	gi|758364351|emb|CEP13213.1|	4e-21	231	Parasitella parasitica
NP568|NG_569|III	gi|317141086|ref|XP_003189332.1|	4e-21	228	Aspergillus oryzae RIB40
NP568|NG_569|III	gi|589273110|ref|XP_007002285.1|	4e-21	227	Tremella mesenterica DSM 1558
NP568|NG_569|III	gi|758370414|emb|CEP07157.1|	4e-21	215	Parasitella parasitica
NP568|NG_569|III	gi|630224998|ref|XP_007859594.1|	5e-21	226	Moniliophthora roreri MCA 2997
NP568|NG_569|III	gi|691784682|emb|CDO77900.1|	5e-21	225	Trametes cinnabarina
NP568|NG_569|III	gi|660956462|gb|KEP45594.1|	5e-21	214	Rhizoctonia solani 123E
NP568|NG_569|III	gi|630180616|ref|XP_007845212.1|	5e-21	226	Moniliophthora roreri MCA 2997
NP568|NG_569|III	gi|471874481|emb|CCO36023.1|	5e-21	210	Rhizoctonia solani AG-1 IB
NP568|NG_569|III	gi|329351125|gb|AEB91356.1|	5e-21	224	Verticillium dahliae VdLs.17
NP568|NG_569|III	gi|471881457|emb|CCO34493.1|	6e-21	211	Rhizoctonia solani AG-1 IB
NP568|NG_569|III	gi|154289800|ref|XP_001545506.1|	6e-21	223	Botryotinia fuckeliana B05.10
NP568|NG_569|III	gi|154290730|ref|XP_001545956.1|	6e-21	223	Botryotinia fuckeliana B05.10
NP568|NG_569|III	gi|471867041|emb|CCO37761.1|	6e-21	210	Rhizoctonia solani AG-1 IB
NP568|NG_569|III	gi|630221673|ref|XP_007858504.1|	7e-21	226	Moniliophthora roreri MCA 2997
NP568|NG_569|III	gi|630200249|ref|XP_007851526.1|	7e-21	231	Moniliophthora roreri MCA 2997
NP568|NG_569|III	gi|156059422|ref|XP_001595634.1|	7e-21	227	Sclerotinia sclerotiorum 1980 UF-70
NP568|NG_569|III	gi|589273094|ref|XP_007002277.1|	7e-21	227	Tremella mesenterica DSM 1558
NP568|NG_569|III	gi|682386765|gb|KFY68550.1|	8e-21	228	Pseudogymnoascus pannorum VKM F-4517 (FW-2822)
NP568|NG_569|III	gi|589269962|ref|XP_007000711.1|	8e-21	227	Tremella mesenterica DSM 1558
NP568|NG_569|III	gi|215449093|gb|EEB89023.1|	8e-21	219	Moniliophthora perniciosa FA553
NP568|NG_569|III	gi|748551144|dbj|GAM43382.1|	8e-21	228	Talaromyces cellulolyticus
NP568|NG_569|III	gi|154296535|ref|XP_001548698.1|	8e-21	223	Botryotinia fuckeliana B05.10
NP568|NG_569|III	gi|630181455|ref|XP_007845485.1|	8e-21	223	Moniliophthora roreri MCA 2997
NP568|NG_569|III	gi|630221420|ref|XP_007858421.1|	9e-21	226	Moniliophthora roreri MCA 2997
NP568|NG_569|III	gi|630194446|ref|XP_007849645.1|	9e-21	231	Moniliophthora roreri MCA 2997
NP568|NG_569|III	gi|691789174|emb|CDO74831.1|	9e-21	227	Trametes cinnabarina
NP568|NG_569|III	gi|471869032|emb|CCO37252.1|	1e-20	210	Rhizoctonia solani AG-1 IB
NP568|NG_569|III	gi|630220729|ref|XP_007858187.1|	1e-20	226	Moniliophthora roreri MCA 2997
NP568|NG_569|III	gi|758367856|emb|CEP09716.1|	1e-20	215	Parasitella parasitica
NP568|NG_569|III	gi|589273106|ref|XP_007002283.1|	1e-20	217	Tremella mesenterica DSM 1558
NP568|NG_569|III	gi|691785027|emb|CDO77784.1|	1e-20	227	Trametes cinnabarina
NP568|NG_569|III	gi|215449827|gb|EEB89423.1|	1e-20	205	Moniliophthora perniciosa FA553
NP568|NG_569|III	gi|630223517|ref|XP_007859111.1|	1e-20	206	Moniliophthora roreri MCA 2997
NP568|NG_569|III	gi|471875731|emb|CCO35749.1|	1e-20	210	Rhizoctonia solani AG-1 IB
NP568|NG_569|III	gi|215449608|gb|EEB89307.1|	1e-20	205	Moniliophthora perniciosa FA553
NP568|NG_569|III	gi|743656225|gb|KID83641.1|	1e-20	215	Metarhizium guizhouense ARSEF 977
NP568|NG_569|III	gi|116194682|ref|XP_001223153.1|	1e-20	219	Chaetomium globosum CBS 148.51
NP568|NG_569|III	gi|691787672|emb|CDO75899.1|	1e-20	227	Trametes cinnabarina
NP568|NG_569|III	gi|743653894|gb|KID81532.1|	2e-20	215	Metarhizium guizhouense ARSEF 977
NP568|NG_569|III	gi|406693857|gb|EKC97200.1|	2e-20	229	Trichosporon asahii var. asahii CBS 8904
NP568|NG_569|III	gi|751829662|emb|CEL62389.1|	2e-20	210	Rhizoctonia solani AG-1 IB
NP568|NG_569|III	gi|682311141|gb|KFY19162.1|	2e-20	228	Pseudogymnoascus pannorum VKM F-4281 (FW-2241)
NP568|NG_569|III	gi|388856373|emb|CCF49922.1|	2e-20	223	Ustilago hordei
NP568|NG_569|III	gi|630217341|ref|XP_007857087.1|	2e-20	224	Moniliophthora roreri MCA 2997
NP568|NG_569|III	gi|751830580|emb|CEL56970.1|	2e-20	210	Rhizoctonia solani AG-1 IB
NP568|NG_569|III	gi|471874119|emb|CCO36109.1|	2e-20	210	Rhizoctonia solani AG-1 IB
NP568|NG_569|III	gi|471875411|emb|CCO35827.1|	2e-20	210	Rhizoctonia solani AG-1 IB
NP568|NG_569|III	gi|399164176|emb|CCE34872.1|	2e-20	215	Claviceps purpurea 20.1
NP568|NG_569|III	gi|471870339|emb|CCO36929.1|	3e-20	210	Rhizoctonia solani AG-1 IB
NP568|NG_569|III	gi|630210461|ref|XP_007854860.1|	3e-20	224	Moniliophthora roreri MCA 2997
NP568|NG_569|III	gi|630223551|ref|XP_007859122.1|	3e-20	226	Moniliophthora roreri MCA 2997
NP568|NG_569|III	gi|471887989|emb|CCO32968.1|	3e-20	210	Rhizoctonia solani AG-1 IB
NP568|NG_569|III	gi|471879995|emb|CCO34841.1|	3e-20	210	Rhizoctonia solani AG-1 IB
NP568|NG_569|III	gi|471887512|emb|CCO33096.1|	3e-20	211	Rhizoctonia solani AG-1 IB
NP568|NG_569|III	gi|751831400|emb|CEL53427.1|	3e-20	207	Rhizoctonia solani AG-1 IB
NP568|NG_569|III	gi|589273102|ref|XP_007002281.1|	3e-20	202	Tremella mesenterica DSM 1558
NP568|NG_569|III	gi|630203497|ref|XP_007852591.1|	4e-20	226	Moniliophthora roreri MCA 2997
NP568|NG_569|III	gi|315041357|ref|XP_003170055.1|	4e-20	229	Arthroderma gypseum CBS 118893
NP568|NG_569|III	gi|471869575|emb|CCO37118.1|	4e-20	225	Rhizoctonia solani AG-1 IB
NP568|NG_569|III	gi|471899182|emb|CCO30490.1|	4e-20	210	Rhizoctonia solani AG-1 IB
NP568|NG_569|III	gi|691789468|emb|CDO74650.1|	4e-20	227	Trametes cinnabarina
NP568|NG_569|III	gi|471871479|emb|CCO36653.1|	4e-20	211	Rhizoctonia solani AG-1 IB
NP568|NG_569|III	gi|471877572|emb|CCO35377.1|	4e-20	210	Rhizoctonia solani AG-1 IB
NP568|NG_569|III	gi|630222938|ref|XP_007858921.1|	4e-20	223	Moniliophthora roreri MCA 2997
NP568|NG_569|III	gi|471871859|emb|CCO36581.1|	4e-20	211	Rhizoctonia solani AG-1 IB
NP568|NG_569|III	gi|406698503|gb|EKD01739.1|	4e-20	228	Trichosporon asahii var. asahii CBS 8904
NP568|NG_569|III	gi|630221658|ref|XP_007858498.1|	4e-20	226	Moniliophthora roreri MCA 2997
NP568|NG_569|III	gi|751835641|emb|CEL54440.1|	4e-20	213	Rhizoctonia solani AG-1 IB
NP568|NG_569|III	gi|471873277|emb|CCO36286.1|	4e-20	210	Rhizoctonia solani AG-1 IB
NP568|NG_569|III	gi|751831234|emb|CEL53989.1|	4e-20	211	Rhizoctonia solani AG-1 IB
NP568|NG_569|III	gi|242816502|ref|XP_002486791.1|	4e-20	241	Talaromyces stipitatus ATCC 10500
NP568|NG_569|III	gi|661175528|emb|CDH61236.1|	5e-20	222	Lichtheimia corymbifera JMRC:FSU:9682
NP568|NG_569|III	gi|682286732|gb|KFY05986.1|	5e-20	223	Pseudogymnoascus pannorum VKM F-3775
NP568|NG_569|III	gi|630222041|ref|XP_007858628.1|	5e-20	224	Moniliophthora roreri MCA 2997
NP568|NG_569|III	gi|630221100|ref|XP_007858309.1|	5e-20	222	Moniliophthora roreri MCA 2997
NP568|NG_569|III	gi|406697797|gb|EKD01048.1|	5e-20	220	Trichosporon asahii var. asahii CBS 8904
NP568|NG_569|III	gi|471886081|emb|CCO33426.1|	5e-20	216	Rhizoctonia solani AG-1 IB
NP568|NG_569|III	gi|691796800|emb|CDO68578.1|	5e-20	227	Trametes cinnabarina
NP568|NG_569|III	gi|751831330|emb|CEL53691.1|	6e-20	211	Rhizoctonia solani AG-1 IB
NP568|NG_569|III	gi|630224298|ref|XP_007859365.1|	6e-20	221	Moniliophthora roreri MCA 2997
NP568|NG_569|III	gi|630198205|ref|XP_007850860.1|	6e-20	228	Moniliophthora roreri MCA 2997
NP568|NG_569|III	gi|406702754|gb|EKD05684.1|	6e-20	225	Trichosporon asahii var. asahii CBS 8904
NP568|NG_569|III	gi|471871047|emb|CCO36766.1|	6e-20	210	Rhizoctonia solani AG-1 IB
NP568|NG_569|III	gi|682311033|gb|KFY19110.1|	6e-20	225	Pseudogymnoascus pannorum VKM F-4281 (FW-2241)
NP568|NG_569|III	gi|799240998|gb|KJZ70324.1|	6e-20	216	Hirsutella minnesotensis 3608
NP568|NG_569|III	gi|471879183|emb|CCO35051.1|	7e-20	211	Rhizoctonia solani AG-1 IB
NP568|NG_569|III	gi|589269982|ref|XP_007000721.1|	7e-20	217	Tremella mesenterica DSM 1558
NP568|NG_569|III	gi|471869519|emb|CCO37133.1|	7e-20	211	Rhizoctonia solani AG-1 IB
NP568|NG_569|III	gi|215448759|gb|EEB88836.1|	7e-20	182	Moniliophthora perniciosa FA553
NP568|NG_569|III	gi|471868891|emb|CCO37294.1|	7e-20	210	Rhizoctonia solani AG-1 IB
NP568|NG_569|III	gi|751831541|emb|CEL53115.1|	7e-20	220	Rhizoctonia solani AG-1 IB
NP568|NG_569|III	gi|751831907|emb|CEL63613.1|	7e-20	210	Rhizoctonia solani AG-1 IB
NP568|NG_569|III	gi|471866825|emb|CCO37797.1|	7e-20	210	Rhizoctonia solani AG-1 IB
NP568|NG_569|III	gi|471875859|emb|CCO35725.1|	8e-20	210	Rhizoctonia solani AG-1 IB
NP568|NG_569|III	gi|471873662|emb|CCO36200.1|	8e-20	211	Rhizoctonia solani AG-1 IB
NP568|NG_569|III	gi|630226107|ref|XP_007859957.1|	9e-20	221	Moniliophthora roreri MCA 2997
NP568|NG_569|III	gi|471875924|emb|CCO35713.1|	9e-20	211	Rhizoctonia solani AG-1 IB
NP568|NG_569|III	gi|471870273|emb|CCO36952.1|	9e-20	211	Rhizoctonia solani AG-1 IB
NP568|NG_569|III	gi|751831072|emb|CEL54414.1|	9e-20	211	Rhizoctonia solani AG-1 IB
NP568|NG_569|III	gi|758357764|emb|CEP19816.1|	9e-20	229	Parasitella parasitica
NP568|NG_569|III	gi|471880092|emb|CCO34817.1|	9e-20	225	Rhizoctonia solani AG-1 IB
NP568|NG_569|III	gi|471875464|emb|CCO35819.1|	1e-19	210	Rhizoctonia solani AG-1 IB
NP568|NG_569|III	gi|630208292|ref|XP_007854160.1|	1e-19	224	Moniliophthora roreri MCA 2997
NP568|NG_569|III	gi|630224395|ref|XP_007859397.1|	1e-19	228	Moniliophthora roreri MCA 2997
NP568|NG_569|III	gi|630222146|ref|XP_007858662.1|	1e-19	226	Moniliophthora roreri MCA 2997
NP568|NG_569|III	gi|342886552|gb|EGU86348.1|	1e-19	229	Fusarium oxysporum Fo5176
NP568|NG_569|III	gi|630224452|ref|XP_007859416.1|	1e-19	228	Moniliophthora roreri MCA 2997
NP568|NG_569|III	gi|471871977|emb|CCO36560.1|	1e-19	211	Rhizoctonia solani AG-1 IB
NP568|NG_569|III	gi|751830323|emb|CEL58947.1|	1e-19	210	Rhizoctonia solani AG-1 IB
NP568|NG_569|III	gi|471879201|emb|CCO35047.1|	1e-19	213	Rhizoctonia solani AG-1 IB
NP568|NG_569|III	gi|471876772|emb|CCO35546.1|	1e-19	211	Rhizoctonia solani AG-1 IB
NP568|NG_569|III	gi|471881412|emb|CCO34509.1|	1e-19	212	Rhizoctonia solani AG-1 IB
NP568|NG_569|III	gi|471875772|emb|CCO35739.1|	1e-19	213	Rhizoctonia solani AG-1 IB
NP568|NG_569|III	gi|471892258|emb|CCO32022.1|	1e-19	211	Rhizoctonia solani AG-1 IB
NP568|NG_569|III	gi|471872159|emb|CCO36518.1|	1e-19	210	Rhizoctonia solani AG-1 IB
NP568|NG_569|III	gi|471873312|emb|CCO36276.1|	1e-19	211	Rhizoctonia solani AG-1 IB
NP568|NG_569|III	gi|751830181|emb|CEL60090.1|	2e-19	211	Rhizoctonia solani AG-1 IB
NP568|NG_569|III	gi|471880459|emb|CCO34734.1|	2e-19	218	Rhizoctonia solani AG-1 IB
NP568|NG_569|III	gi|317146488|ref|XP_003189815.1|	2e-19	228	Aspergillus oryzae RIB40
NP568|NG_569|III	gi|317159454|ref|XP_003191074.1|	2e-19	228	Aspergillus oryzae RIB40
NP568|NG_569|III	gi|799242578|gb|KJZ71637.1|	2e-19	230	Hirsutella minnesotensis 3608
NP568|NG_569|III	gi|630223627|ref|XP_007859147.1|	2e-19	226	Moniliophthora roreri MCA 2997
NP568|NG_569|III	gi|752339870|gb|KIN98979.1|	2e-19	230	Pisolithus tinctorius Marx 270
NP568|NG_569|III	gi|317158528|ref|XP_003190983.1|	2e-19	228	Aspergillus oryzae RIB40
NP568|NG_569|III	gi|317138877|ref|XP_003189097.1|	2e-19	228	Aspergillus oryzae RIB40
NP568|NG_569|III	gi|317158449|ref|XP_003190969.1|	2e-19	228	Aspergillus oryzae RIB40
NP568|NG_569|III	gi|751829685|emb|CEL62325.1|	2e-19	211	Rhizoctonia solani AG-1 IB
NP568|NG_569|III	gi|215455275|gb|EEB92002.1|	2e-19	182	Moniliophthora perniciosa FA553
NP568|NG_569|III	gi|471871997|emb|CCO36557.1|	2e-19	211	Rhizoctonia solani AG-1 IB
NP568|NG_569|III	gi|691788487|emb|CDO75323.1|	2e-19	216	Trametes cinnabarina
NP568|NG_569|III	gi|751831785|emb|CEL64012.1|	2e-19	210	Rhizoctonia solani AG-1 IB
NP568|NG_569|III	gi|471881966|emb|CCO34382.1|	2e-19	216	Rhizoctonia solani AG-1 IB
NP568|NG_569|III	gi|629659221|ref|XP_007804384.1|	2e-19	202	Endocarpon pusillum Z07020
NP568|NG_569|III	gi|471876596|emb|CCO35595.1|	2e-19	210	Rhizoctonia solani AG-1 IB
NP568|NG_569|III	gi|630222577|ref|XP_007858804.1|	2e-19	213	Moniliophthora roreri MCA 2997
NP568|NG_569|III	gi|471877183|emb|CCO35457.1|	2e-19	216	Rhizoctonia solani AG-1 IB
NP568|NG_569|III	gi|630225145|ref|XP_007859641.1|	2e-19	226	Moniliophthora roreri MCA 2997
NP568|NG_569|III	gi|471874132|emb|CCO36103.1|	3e-19	225	Rhizoctonia solani AG-1 IB
NP568|NG_569|III	gi|471871142|emb|CCO36741.1|	3e-19	211	Rhizoctonia solani AG-1 IB
NP568|NG_569|III	gi|630217538|ref|XP_007857155.1|	3e-19	224	Moniliophthora roreri MCA 2997
NP568|NG_569|III	gi|471875670|emb|CCO35770.1|	3e-19	211	Rhizoctonia solani AG-1 IB
NP568|NG_569|III	gi|471873296|emb|CCO36279.1|	3e-19	211	Rhizoctonia solani AG-1 IB
NP568|NG_569|III	gi|5002510|dbj|BAA78625.1|	3e-19	213	Tricholoma matsutake
NP568|NG_569|III	gi|630197859|ref|XP_007850749.1|	3e-19	207	Moniliophthora roreri MCA 2997
NP568|NG_569|III	gi|471883690|emb|CCO33941.1|	3e-19	211	Rhizoctonia solani AG-1 IB
NP568|NG_569|III	gi|751830611|emb|CEL56947.1|	3e-19	211	Rhizoctonia solani AG-1 IB
NP568|NG_569|III	gi|471886209|emb|CCO33383.1|	3e-19	210	Rhizoctonia solani AG-1 IB
NP568|NG_569|III	gi|630222017|ref|XP_007858620.1|	3e-19	225	Moniliophthora roreri MCA 2997
NP568|NG_569|III	gi|347841893|emb|CCD56465.1|	3e-19	232	Botryotinia fuckeliana T4
NP568|NG_569|III	gi|471892240|emb|CCO32032.1|	4e-19	211	Rhizoctonia solani AG-1 IB
NP568|NG_569|III	gi|471883451|emb|CCO34010.1|	4e-19	211	Rhizoctonia solani AG-1 IB
NP568|NG_569|III	gi|691785809|emb|CDO77169.1|	4e-19	227	Trametes cinnabarina
NP568|NG_569|III	gi|388856364|emb|CCF49913.1|	4e-19	195	Ustilago hordei
NP568|NG_569|III	gi|691792653|emb|CDO72137.1|	4e-19	225	Trametes cinnabarina
NP568|NG_569|III	gi|153917328|dbj|BAF74362.1|	4e-19	179	Lentinula edodes
NP568|NG_569|III	gi|471872953|emb|CCO36351.1|	4e-19	210	Rhizoctonia solani AG-1 IB
NP568|NG_569|III	gi|471884727|emb|CCO33727.1|	4e-19	210	Rhizoctonia solani AG-1 IB
NP568|NG_569|III	gi|471868041|emb|CCO37531.1|	4e-19	211	Rhizoctonia solani AG-1 IB
NP568|NG_569|III	gi|384486074|gb|EIE78254.1|	4e-19	203	Rhizopus delemar RA 99-880
NP568|NG_569|III	gi|576988840|gb|EUC61564.1|	4e-19	239	Rhizoctonia solani AG-3 Rhs1AP
NP568|NG_569|III	gi|471866233|emb|CCO37911.1|	4e-19	213	Rhizoctonia solani AG-1 IB
NP568|NG_569|III	gi|599124436|ref|XP_007389386.1|	5e-19	230	Punctularia strigosozonata HHB-11173 SS5
NP568|NG_569|III	gi|630212872|ref|XP_007855640.1|	5e-19	225	Moniliophthora roreri MCA 2997
NP568|NG_569|III	gi|751831290|emb|CEL53730.1|	5e-19	213	Rhizoctonia solani AG-1 IB
NP568|NG_569|III	gi|630222228|ref|XP_007858689.1|	5e-19	226	Moniliophthora roreri MCA 2997
NP568|NG_569|III	gi|630200025|ref|XP_007851453.1|	5e-19	226	Moniliophthora roreri MCA 2997
NP568|NG_569|III	gi|751830411|emb|CEL58622.1|	5e-19	210	Rhizoctonia solani AG-1 IB
NP568|NG_569|III	gi|471895456|emb|CCO31297.1|	5e-19	210	Rhizoctonia solani AG-1 IB
NP568|NG_569|III	gi|471879987|emb|CCO34845.1|	5e-19	210	Rhizoctonia solani AG-1 IB
NP568|NG_569|III	gi|471881673|emb|CCO34445.1|	5e-19	185	Rhizoctonia solani AG-1 IB
NP568|NG_569|III	gi|471880002|emb|CCO34838.1|	5e-19	210	Rhizoctonia solani AG-1 IB
NP568|NG_569|III	gi|751829985|emb|CEL61189.1|	5e-19	210	Rhizoctonia solani AG-1 IB
NP568|NG_569|III	gi|660956719|gb|KEP45669.1|	6e-19	239	Rhizoctonia solani 123E
NP568|NG_569|III	gi|630212228|ref|XP_007855431.1|	6e-19	222	Moniliophthora roreri MCA 2997
NP568|NG_569|III	gi|751832300|emb|CEL62861.1|	6e-19	210	Rhizoctonia solani AG-1 IB
NP568|NG_569|III	gi|751841809|emb|CEL51507.1|	6e-19	210	Rhizoctonia solani AG-1 IB
NP568|NG_569|III	gi|471874504|emb|CCO36016.1|	6e-19	211	Rhizoctonia solani AG-1 IB
NP568|NG_569|III	gi|471869379|emb|CCO37168.1|	6e-19	211	Rhizoctonia solani AG-1 IB
NP568|NG_569|III	gi|630224428|ref|XP_007859408.1|	6e-19	183	Moniliophthora roreri MCA 2997
NP568|NG_569|III	gi|751830447|emb|CEL58538.1|	6e-19	215	Rhizoctonia solani AG-1 IB
NP568|NG_569|III	gi|471872748|emb|CCO36398.1|	6e-19	210	Rhizoctonia solani AG-1 IB
NP568|NG_569|III	gi|471885901|emb|CCO33469.1|	6e-19	213	Rhizoctonia solani AG-1 IB
NP568|NG_569|III	gi|751831009|emb|CEL54620.1|	6e-19	210	Rhizoctonia solani AG-1 IB
NP568|NG_569|III	gi|752334313|gb|KIN93567.1|	6e-19	215	Pisolithus tinctorius Marx 270
NP568|NG_569|III	gi|471869880|emb|CCO37051.1|	6e-19	210	Rhizoctonia solani AG-1 IB
NP568|NG_569|III	gi|471867587|emb|CCO37644.1|	7e-19	211	Rhizoctonia solani AG-1 IB
NP568|NG_569|III	gi|751829381|emb|CEL63527.1|	7e-19	211	Rhizoctonia solani AG-1 IB
NP568|NG_569|III	gi|255726280|ref|XP_002548066.1|	7e-19	231	Candida tropicalis MYA-3404
NP568|NG_569|III	gi|471870512|emb|CCO36889.1|	7e-19	210	Rhizoctonia solani AG-1 IB
NP568|NG_569|III	gi|630223067|ref|XP_007858964.1|	7e-19	212	Moniliophthora roreri MCA 2997
NP568|NG_569|III	gi|471865883|emb|CCO37970.1|	7e-19	210	Rhizoctonia solani AG-1 IB
NP568|NG_569|III	gi|471870336|emb|CCO36930.1|	8e-19	210	Rhizoctonia solani AG-1 IB
NP568|NG_569|III	gi|215448772|gb|EEB88843.1|	8e-19	182	Moniliophthora perniciosa FA553
NP568|NG_569|III	gi|471875722|emb|CCO35751.1|	8e-19	210	Rhizoctonia solani AG-1 IB
NP568|NG_569|III	gi|752277262|dbj|GAM88161.1|	8e-19	192	fungal sp. No.11243
NP568|NG_569|III	gi|471874685|emb|CCO35971.1|	8e-19	210	Rhizoctonia solani AG-1 IB
NP568|NG_569|III	gi|630203480|ref|XP_007852586.1|	8e-19	222	Moniliophthora roreri MCA 2997
NP568|NG_569|III	gi|630219595|ref|XP_007857818.1|	8e-19	215	Moniliophthora roreri MCA 2997
NP568|NG_569|III	gi|630223828|ref|XP_007859213.1|	9e-19	224	Moniliophthora roreri MCA 2997
NP568|NG_569|III	gi|691789644|emb|CDO74528.1|	9e-19	227	Trametes cinnabarina
NP568|NG_569|III	gi|471880071|emb|CCO34823.1|	9e-19	210	Rhizoctonia solani AG-1 IB
NP568|NG_569|III	gi|936404290|gb|KPM33905.1|	9e-19	217	Neonectria ditissima
NP568|NG_569|III	gi|630225320|ref|XP_007859699.1|	9e-19	227	Moniliophthora roreri MCA 2997
NP568|NG_569|III	gi|630224961|ref|XP_007859582.1|	1e-18	224	Moniliophthora roreri MCA 2997
NP568|NG_569|III	gi|471869706|emb|CCO37088.1|	1e-18	211	Rhizoctonia solani AG-1 IB
NP568|NG_569|III	gi|691787083|emb|CDO76285.1|	1e-18	225	Trametes cinnabarina
NP568|NG_569|III	gi|630218725|ref|XP_007857537.1|	1e-18	226	Moniliophthora roreri MCA 2997
NP568|NG_569|III	gi|471867060|emb|CCO37756.1|	1e-18	211	Rhizoctonia solani AG-1 IB
NP568|NG_569|III	gi|576986034|gb|EUC58770.1|	1e-18	212	Rhizoctonia solani AG-3 Rhs1AP
NP568|NG_569|III	gi|471872400|emb|CCO36470.1|	1e-18	210	Rhizoctonia solani AG-1 IB
NP568|NG_569|III	gi|630223933|ref|XP_007859247.1|	1e-18	226	Moniliophthora roreri MCA 2997
NP568|NG_569|III	gi|930420441|ref|XP_014184493.1|	1e-18	220	Trichosporon asahii var. asahii CBS 2479
NP568|NG_569|III	gi|471892251|emb|CCO32027.1|	1e-18	211	Rhizoctonia solani AG-1 IB
NP568|NG_569|III	gi|751831308|emb|CEL53709.1|	1e-18	211	Rhizoctonia solani AG-1 IB
NP568|NG_569|III	gi|630219032|ref|XP_007857637.1|	1e-18	226	Moniliophthora roreri MCA 2997
NP568|NG_569|III	gi|471873017|emb|CCO36341.1|	1e-18	210	Rhizoctonia solani AG-1 IB
NP568|NG_569|III	gi|630222634|ref|XP_007858823.1|	1e-18	232	Moniliophthora roreri MCA 2997
NP568|NG_569|III	gi|816185104|emb|CRG92938.1|	1e-18	219	Talaromyces islandicus
NP568|NG_569|III	gi|471870315|emb|CCO36935.1|	1e-18	211	Rhizoctonia solani AG-1 IB
NP568|NG_569|III	gi|630223145|ref|XP_007858989.1|	2e-18	188	Moniliophthora roreri MCA 2997
NP568|NG_569|III	gi|691784546|emb|CDO77965.1|	2e-18	227	Trametes cinnabarina
NP568|NG_569|III	gi|471869125|emb|CCO37229.1|	2e-18	211	Rhizoctonia solani AG-1 IB
NP568|NG_569|III	gi|630224792|ref|XP_007859527.1|	2e-18	225	Moniliophthora roreri MCA 2997
NP568|NG_569|III	gi|471892269|emb|CCO32020.1|	2e-18	210	Rhizoctonia solani AG-1 IB
NP568|NG_569|III	gi|406700077|gb|EKD03262.1|	2e-18	230	Trichosporon asahii var. asahii CBS 8904
NP568|NG_569|III	gi|752339728|gb|KIN98838.1|	2e-18	230	Pisolithus tinctorius Marx 270
NP568|NG_569|III	gi|758364767|emb|CEP12794.1|	2e-18	210	Parasitella parasitica
NP568|NG_569|III	gi|471872291|emb|CCO36491.1|	2e-18	211	Rhizoctonia solani AG-1 IB
NP568|NG_569|III	gi|691787032|emb|CDO76329.1|	2e-18	225	Trametes cinnabarina
NP568|NG_569|III	gi|630221413|ref|XP_007858419.1|	2e-18	226	Moniliophthora roreri MCA 2997
NP568|NG_569|III	gi|215449696|gb|EEB89354.1|	2e-18	217	Moniliophthora perniciosa FA553
NP568|NG_569|III	gi|471867768|emb|CCO37604.1|	2e-18	210	Rhizoctonia solani AG-1 IB
NP568|NG_569|III	gi|751831074|emb|CEL54416.1|	2e-18	215	Rhizoctonia solani AG-1 IB
NP568|NG_569|III	gi|660957093|gb|KEP45780.1|	2e-18	239	Rhizoctonia solani 123E
NP568|NG_569|III	gi|630218478|ref|XP_007857456.1|	2e-18	225	Moniliophthora roreri MCA 2997
NP568|NG_569|III	gi|471869940|emb|CCO37037.1|	2e-18	211	Rhizoctonia solani AG-1 IB
NP568|NG_569|III	gi|751829931|emb|CEL61346.1|	2e-18	210	Rhizoctonia solani AG-1 IB
NP568|NG_569|III	gi|471867777|emb|CCO37602.1|	2e-18	210	Rhizoctonia solani AG-1 IB
NP568|NG_569|III	gi|471869805|emb|CCO37068.1|	2e-18	210	Rhizoctonia solani AG-1 IB
NP568|NG_569|III	gi|598059961|ref|XP_007359353.1|	2e-18	228	Auricularia delicata TFB-10046 SS5
NP568|NG_569|III	gi|630222291|ref|XP_007858710.1|	3e-18	183	Moniliophthora roreri MCA 2997
NP568|NG_569|III	gi|471871713|emb|CCO36604.1|	3e-18	210	Rhizoctonia solani AG-1 IB
NP568|NG_569|III	gi|630968424|ref|XP_007880620.1|	3e-18	223	Pseudozyma flocculosa PF-1
NP568|NG_569|III	gi|471873211|emb|CCO36300.1|	3e-18	211	Rhizoctonia solani AG-1 IB
NP568|NG_569|III	gi|471889236|emb|CCO32702.1|	3e-18	211	Rhizoctonia solani AG-1 IB
NP568|NG_569|III	gi|630206291|ref|XP_007853502.1|	3e-18	225	Moniliophthora roreri MCA 2997
NP568|NG_569|III	gi|471880804|emb|CCO34647.1|	3e-18	210	Rhizoctonia solani AG-1 IB
NP568|NG_569|III	gi|471880482|emb|CCO34731.1|	3e-18	211	Rhizoctonia solani AG-1 IB
NP568|NG_569|III	gi|752340007|gb|KIN99114.1|	3e-18	214	Pisolithus tinctorius Marx 270
NP568|NG_569|III	gi|758366305|emb|CEP11259.1|	3e-18	227	Parasitella parasitica
NP568|NG_569|III	gi|751838041|emb|CEL62768.1|	3e-18	225	Rhizoctonia solani AG-1 IB
NP568|NG_569|III	gi|471899253|emb|CCO30467.1|	3e-18	225	Rhizoctonia solani AG-1 IB
NP568|NG_569|III	gi|471872958|emb|CCO36350.1|	3e-18	210	Rhizoctonia solani AG-1 IB
NP568|NG_569|III	gi|630214347|ref|XP_007856118.1|	4e-18	223	Moniliophthora roreri MCA 2997
NP568|NG_569|III	gi|630220076|ref|XP_007857974.1|	4e-18	222	Moniliophthora roreri MCA 2997
NP568|NG_569|III	gi|751832225|emb|CEL62955.1|	4e-18	211	Rhizoctonia solani AG-1 IB
NP568|NG_569|III	gi|20152590|emb|CAD29542.1|	4e-18	246	Kazachstania exigua
NP568|NG_569|III	gi|630195361|ref|XP_007849942.1|	4e-18	222	Moniliophthora roreri MCA 2997
NP568|NG_569|III	gi|660955990|gb|KEP45477.1|	4e-18	217	Rhizoctonia solani 123E
NP568|NG_569|III	gi|751830919|emb|CEL54850.1|	4e-18	211	Rhizoctonia solani AG-1 IB
NP568|NG_569|III	gi|471869087|emb|CCO37239.1|	5e-18	210	Rhizoctonia solani AG-1 IB
NP568|NG_569|III	gi|471872919|emb|CCO36363.1|	5e-18	211	Rhizoctonia solani AG-1 IB
NP568|NG_569|III	gi|630222349|ref|XP_007858729.1|	5e-18	229	Moniliophthora roreri MCA 2997
NP568|NG_569|III	gi|471868054|emb|CCO37529.1|	5e-18	211	Rhizoctonia solani AG-1 IB
NP568|NG_569|III	gi|751830549|emb|CEL57100.1|	5e-18	211	Rhizoctonia solani AG-1 IB
NP568|NG_569|III	gi|134111348|ref|XP_775816.1|	5e-18	221	Cryptococcus neoformans var. neoformans B-3501A
NP568|NG_569|III	gi|751830998|emb|CEL54630.1|	5e-18	211	Rhizoctonia solani AG-1 IB
NP568|NG_569|III	gi|751830423|emb|CEL58614.1|	5e-18	210	Rhizoctonia solani AG-1 IB
NP568|NG_569|III	gi|58268442|ref|XP_571377.1|	5e-18	221	Cryptococcus neoformans var. neoformans JEC21
NP568|NG_569|III	gi|691796015|emb|CDO69315.1|	5e-18	227	Trametes cinnabarina
NP568|NG_569|III	gi|751830668|emb|CEL56725.1|	5e-18	211	Rhizoctonia solani AG-1 IB
NP568|NG_569|III	gi|471867568|emb|CCO37650.1|	6e-18	211	Rhizoctonia solani AG-1 IB
NP568|NG_569|III	gi|471881651|emb|CCO34453.1|	6e-18	211	Rhizoctonia solani AG-1 IB
NP568|NG_569|III	gi|599118467|ref|XP_007386855.1|	6e-18	220	Punctularia strigosozonata HHB-11173 SS5
NP568|NG_569|III	gi|751184596|gb|KIL70533.1|	6e-18	229	Amanita muscaria Koide BX008
NP568|NG_569|III	gi|336373867|gb|EGO02205.1|	6e-18	173	Serpula lacrymans var. lacrymans S7.3
NP568|NG_569|III	gi|799244138|gb|KJZ73068.1|	6e-18	215	Hirsutella minnesotensis 3608
NP568|NG_569|III	gi|751841709|emb|CEL55972.1|	6e-18	211	Rhizoctonia solani AG-1 IB
NP568|NG_569|III	gi|751830958|emb|CEL54815.1|	6e-18	211	Rhizoctonia solani AG-1 IB
NP568|NG_569|III	gi|751711498|gb|KIM60542.1|	6e-18	217	Scleroderma citrinum Foug A
NP568|NG_569|III	gi|471899260|emb|CCO30465.1|	6e-18	225	Rhizoctonia solani AG-1 IB
NP568|NG_569|III	gi|215454337|gb|EEB91593.1|	6e-18	198	Moniliophthora perniciosa FA553
NP568|NG_569|III	gi|471866870|emb|CCO37789.1|	7e-18	225	Rhizoctonia solani AG-1 IB
NP568|NG_569|III	gi|630225023|ref|XP_007859602.1|	7e-18	207	Moniliophthora roreri MCA 2997
NP568|NG_569|III	gi|471875980|emb|CCO35701.1|	7e-18	211	Rhizoctonia solani AG-1 IB
NP568|NG_569|III	gi|630211530|ref|XP_007855207.1|	7e-18	175	Moniliophthora roreri MCA 2997
NP568|NG_569|III	gi|630201465|ref|XP_007851923.1|	7e-18	225	Moniliophthora roreri MCA 2997
NP568|NG_569|III	gi|471876723|emb|CCO35564.1|	7e-18	211	Rhizoctonia solani AG-1 IB
NP568|NG_569|III	gi|471875750|emb|CCO35744.1|	7e-18	210	Rhizoctonia solani AG-1 IB
NP568|NG_569|III	gi|471869866|emb|CCO37054.1|	7e-18	210	Rhizoctonia solani AG-1 IB
NP568|NG_569|III	gi|471892244|emb|CCO32030.1|	8e-18	210	Rhizoctonia solani AG-1 IB
NP568|NG_569|III	gi|471880514|emb|CCO34715.1|	8e-18	210	Rhizoctonia solani AG-1 IB
NP568|NG_569|III	gi|471867835|emb|CCO37588.1|	8e-18	210	Rhizoctonia solani AG-1 IB
NP568|NG_569|III	gi|630223975|ref|XP_007859261.1|	8e-18	222	Moniliophthora roreri MCA 2997
NP568|NG_569|III	gi|630222595|ref|XP_007858810.1|	8e-18	183	Moniliophthora roreri MCA 2997
NP568|NG_569|III	gi|660955510|gb|KEP45367.1|	8e-18	200	Rhizoctonia solani 123E
NP568|NG_569|III	gi|471880108|emb|CCO34815.1|	8e-18	211	Rhizoctonia solani AG-1 IB
NP568|NG_569|III	gi|471868495|emb|CCO37400.1|	8e-18	210	Rhizoctonia solani AG-1 IB
NP568|NG_569|III	gi|471895482|emb|CCO31289.1|	9e-18	225	Rhizoctonia solani AG-1 IB
NP568|NG_569|III	gi|630224584|ref|XP_007859459.1|	9e-18	225	Moniliophthora roreri MCA 2997
NP568|NG_569|III	gi|751831103|emb|CEL54234.1|	9e-18	226	Rhizoctonia solani AG-1 IB
NP568|NG_569|III	gi|471884787|emb|CCO33707.1|	9e-18	210	Rhizoctonia solani AG-1 IB
NP568|NG_569|III	gi|471887985|emb|CCO32969.1|	9e-18	211	Rhizoctonia solani AG-1 IB
NP568|NG_569|III	gi|630225534|ref|XP_007859769.1|	1e-17	225	Moniliophthora roreri MCA 2997
NP568|NG_569|III	gi|751831509|emb|CEL53137.1|	1e-17	211	Rhizoctonia solani AG-1 IB
NP568|NG_569|III	gi|471867376|emb|CCO37696.1|	1e-17	211	Rhizoctonia solani AG-1 IB
NP568|NG_569|III	gi|630225060|ref|XP_007859614.1|	1e-17	201	Moniliophthora roreri MCA 2997
NP568|NG_569|III	gi|134112920|ref|XP_775003.1|	1e-17	221	Cryptococcus neoformans var. neoformans B-3501A
NP568|NG_569|III	gi|471877141|emb|CCO35467.1|	1e-17	210	Rhizoctonia solani AG-1 IB
NP568|NG_569|III	gi|630219702|ref|XP_007857852.1|	1e-17	220	Moniliophthora roreri MCA 2997
NP568|NG_569|III	gi|909993004|gb|KNG50450.1|	1e-17	146	Stemphylium lycopersici
NP568|NG_569|III	gi|471881659|emb|CCO34450.1|	1e-17	210	Rhizoctonia solani AG-1 IB
NP568|NG_569|III	gi|471871846|emb|CCO36584.1|	1e-17	211	Rhizoctonia solani AG-1 IB
NP568|NG_569|III	gi|751719250|gb|KIM68243.1|	1e-17	217	Scleroderma citrinum Foug A
NP568|NG_569|III	gi|682287596|gb|KFY06188.1|	1e-17	208	Pseudogymnoascus pannorum VKM F-3775
NP568|NG_569|III	gi|630219784|ref|XP_007857879.1|	1e-17	226	Moniliophthora roreri MCA 2997
NP568|NG_569|III	gi|751829506|emb|CEL63027.1|	1e-17	190	Rhizoctonia solani AG-1 IB
NP568|NG_569|III	gi|751701098|gb|KIM50491.1|	1e-17	217	Scleroderma citrinum Foug A
NP568|NG_569|III	gi|660956535|gb|KEP45615.1|	1e-17	200	Rhizoctonia solani 123E
NP568|NG_569|III	gi|471899094|emb|CCO30517.1|	2e-17	210	Rhizoctonia solani AG-1 IB
NP568|NG_569|III	gi|630198373|ref|XP_007850915.1|	2e-17	228	Moniliophthora roreri MCA 2997
NP568|NG_569|III	gi|471889841|emb|CCO32569.1|	2e-17	210	Rhizoctonia solani AG-1 IB
NP568|NG_569|III	gi|930414569|ref|XP_014181557.1|	2e-17	216	Trichosporon asahii var. asahii CBS 2479
NP568|NG_569|III	gi|471884329|emb|CCO33798.1|	2e-17	211	Rhizoctonia solani AG-1 IB
NP568|NG_569|III	gi|471884731|emb|CCO33726.1|	2e-17	211	Rhizoctonia solani AG-1 IB
NP568|NG_569|III	gi|589269960|ref|XP_007000710.1|	2e-17	228	Tremella mesenterica DSM 1558
NP568|NG_569|III	gi|752339901|gb|KIN99009.1|	2e-17	213	Pisolithus tinctorius Marx 270
NP568|NG_569|III	gi|471871271|emb|CCO36710.1|	2e-17	211	Rhizoctonia solani AG-1 IB
NP568|NG_569|III	gi|471871276|emb|CCO36709.1|	2e-17	216	Rhizoctonia solani AG-1 IB
NP568|NG_569|III	gi|50402537|gb|AAT76520.1|	2e-17	217	Moniliophthora perniciosa
NP568|NG_569|III	gi|751830995|emb|CEL54627.1|	2e-17	211	Rhizoctonia solani AG-1 IB
NP568|NG_569|III	gi|751834805|emb|CEL56624.1|	2e-17	225	Rhizoctonia solani AG-1 IB
NP568|NG_569|III	gi|648154013|gb|KDR67836.1|	2e-17	203	Galerina marginata CBS 339.88
NP568|NG_569|III	gi|924121196|emb|CUA71329.1|	2e-17	203	Rhizoctonia solani
NP568|NG_569|III	gi|471881663|emb|CCO34449.1|	2e-17	210	Rhizoctonia solani AG-1 IB
NP568|NG_569|III	gi|751830711|emb|CEL56599.1|	2e-17	211	Rhizoctonia solani AG-1 IB
NP568|NG_569|III	gi|751830381|emb|CEL58714.1|	2e-17	211	Rhizoctonia solani AG-1 IB
NP568|NG_569|III	gi|751829639|emb|CEL62425.1|	2e-17	216	Rhizoctonia solani AG-1 IB
NP568|NG_569|III	gi|751832532|emb|CEL62189.1|	2e-17	211	Rhizoctonia solani AG-1 IB
NP568|NG_569|III	gi|924119899|emb|CUA72545.1|	2e-17	202	Rhizoctonia solani
NP568|NG_569|III	gi|425777956|gb|EKV16106.1|	3e-17	149	Penicillium digitatum Pd1
NP568|NG_569|III	gi|924122689|emb|CUA70042.1|	3e-17	203	Rhizoctonia solani
NP568|NG_569|III	gi|749830815|gb|KIJ09019.1|	3e-17	229	Paxillus involutus ATCC 200175
NP568|NG_569|III	gi|336257329|ref|XP_003343586.1|	3e-17	215	Sordaria macrospora k-hell
NP568|NG_569|III	gi|471869479|emb|CCO37148.1|	3e-17	211	Rhizoctonia solani AG-1 IB
NP568|NG_569|III	gi|751834878|emb|CEL56697.1|	3e-17	210	Rhizoctonia solani AG-1 IB
NP568|NG_569|III	gi|471882281|emb|CCO34298.1|	3e-17	211	Rhizoctonia solani AG-1 IB
NP568|NG_569|III	gi|471906814|emb|CCO28717.1|	3e-17	211	Rhizoctonia solani AG-1 IB
NP568|NG_569|III	gi|660956873|gb|KEP45716.1|	3e-17	239	Rhizoctonia solani 123E
NP568|NG_569|III	gi|924116857|emb|CUA75242.1|	3e-17	240	Rhizoctonia solani
NP568|NG_569|III	gi|909605371|gb|KNE95757.1|	3e-17	224	Puccinia striiformis f. sp. tritici PST-78
NP568|NG_569|III	gi|630201977|ref|XP_007852091.1|	3e-17	213	Moniliophthora roreri MCA 2997
NP568|NG_569|III	gi|326484378|gb|EGE08388.1|	3e-17	223	Trichophyton equinum CBS 127.97
NP568|NG_569|III	gi|471896474|emb|CCO31090.1|	3e-17	193	Rhizoctonia solani AG-1 IB
NP568|NG_569|III	gi|751830279|emb|CEL59046.1|	3e-17	225	Rhizoctonia solani AG-1 IB
NP568|NG_569|III	gi|171684235|ref|XP_001907059.1|	3e-17	219	Podospora anserina;Podospora anserina S mat+
NP568|NG_569|III	gi|751830513|emb|CEL57284.1|	3e-17	210	Rhizoctonia solani AG-1 IB
NP568|NG_569|III	gi|471901216|emb|CCO29985.1|	3e-17	211	Rhizoctonia solani AG-1 IB
NP568|NG_569|III	gi|748527288|ref|XP_011127504.1|	3e-17	202	Arthrobotrys oligospora ATCC 24927
NP568|NG_569|III	gi|471878204|emb|CCO35258.1|	3e-17	210	Rhizoctonia solani AG-1 IB
NP568|NG_569|III	gi|630223430|ref|XP_007859082.1|	4e-17	226	Moniliophthora roreri MCA 2997
NP568|NG_569|III	gi|630224020|ref|XP_007859276.1|	4e-17	224	Moniliophthora roreri MCA 2997
NP568|NG_569|III	gi|116191585|ref|XP_001221605.1|	4e-17	229	Chaetomium globosum CBS 148.51
NP568|NG_569|III	gi|471892721|emb|CCO31913.1|	4e-17	199	Rhizoctonia solani AG-1 IB
NP568|NG_569|III	gi|471875883|emb|CCO35718.1|	4e-17	210	Rhizoctonia solani AG-1 IB
NP568|NG_569|III	gi|471885400|emb|CCO33577.1|	4e-17	216	Rhizoctonia solani AG-1 IB
NP568|NG_569|III	gi|751830634|emb|CEL56825.1|	5e-17	210	Rhizoctonia solani AG-1 IB
NP568|NG_569|III	gi|731390147|ref|XP_010650251.1|	2e-29	235	Vitis vinifera
NP568|NG_569|III	gi|502166307|ref|XP_004513853.1|	8e-29	230	Cicer arietinum
NP568|NG_569|III	gi|284434698|gb|ADB85398.1|	8e-29	220	Phyllostachys edulis
NP568|NG_569|III	gi|645267554|ref|XP_008239126.1|	1e-27	232	Prunus mume
NP568|NG_569|III	gi|121501699|gb|ABM55240.1|	1e-26	227	Beta vulgaris
NP568|NG_569|III	gi|359372825|gb|AEV42258.1|	2e-26	227	Beta vulgaris
NP568|NG_569|III	gi|731352142|ref|XP_010687387.1|	2e-26	227	Beta vulgaris subsp. vulgaris
NP568|NG_569|III	gi|77552522|gb|ABA95319.1|	3e-26	220	Oryza sativa Japonica Group
NP568|NG_569|III	gi|32488663|emb|CAE03590.1|	3e-26	238	Oryza sativa Japonica Group
NP568|NG_569|III	gi|645279770|ref|XP_008244885.1|	3e-26	229	Prunus mume
NP568|NG_569|III	gi|34015087|gb|AAQ56285.1|	4e-26	232	Oryza sativa Japonica Group
NP568|NG_569|III	gi|147795669|emb|CAN69982.1|	4e-26	228	Vitis vinifera
NP568|NG_569|III	gi|147807472|emb|CAN66189.1|	6e-26	228	Vitis vinifera
NP568|NG_569|III	gi|18092337|gb|AAL59229.1|AF448416_9	7e-26	231	Zea mays
NP568|NG_569|III	gi|242085388|ref|XP_002443119.1|	7e-26	223	Sorghum bicolor
NP568|NG_569|III	gi|672205968|ref|XP_008779305.1|	1e-25	231	Phoenix dactylifera
NP568|NG_569|III	gi|62733023|gb|AAX95140.1|	1e-25	234	Oryza sativa Japonica Group
NP568|NG_569|III	gi|53981183|gb|AAV24823.1|	2e-25	231	Oryza sativa Japonica Group
NP568|NG_569|III	gi|387169525|gb|AFJ66186.1|	2e-25	237	Arabidopsis halleri
NP568|NG_569|III	gi|116308819|emb|CAH65959.1|	2e-25	234	Oryza sativa Indica Group
NP568|NG_569|III	gi|847136374|ref|XP_002937970.3|	2e-25	217	Xenopus (Silurana) tropicalis
NP568|NG_569|III	gi|3810595|gb|AAC69377.1|	2e-25	219	Arabidopsis thaliana
NP568|NG_569|III	gi|12322008|gb|AAG51046.1|AC069473_8	2e-25	233	Arabidopsis thaliana
NP568|NG_569|III	gi|5080762|gb|AAD39272.1|AC007203_4	3e-25	231	Arabidopsis thaliana
NP568|NG_569|III	gi|4544430|gb|AAD22339.1|	3e-25	221	Arabidopsis thaliana
NP568|NG_569|III	gi|3810596|gb|AAC69378.1|	3e-25	231	Arabidopsis thaliana
NP568|NG_569|III	gi|747079736|ref|XP_011087088.1|	3e-25	218	Sesamum indicum
NP568|NG_569|III	gi|242117588|dbj|BAH80071.1|	4e-25	230	Oryza sativa Indica Group
NP568|NG_569|III	gi|719769482|ref|XP_010218741.1|	4e-25	231	Tinamus guttatus
NP568|NG_569|III	gi|32488367|emb|CAE02926.1|	4e-25	234	Oryza sativa Japonica Group
NP568|NG_569|III	gi|21741068|emb|CAD41692.1|	4e-25	234	Oryza sativa Japonica Group
NP568|NG_569|III	gi|108707286|gb|ABF95081.1|	4e-25	234	Oryza sativa Japonica Group
NP568|NG_569|III	gi|698451928|ref|XP_009778786.1|	4e-25	231	Nicotiana sylvestris
NP568|NG_569|III	gi|89887350|gb|ABD78329.1|	5e-25	230	Primula vulgaris
NP568|NG_569|III	gi|77554740|gb|ABA97536.1|	5e-25	234	Oryza sativa Japonica Group
NP568|NG_569|III	gi|77554515|gb|ABA97311.1|	5e-25	231	Oryza sativa Japonica Group
NP568|NG_569|III	gi|147775005|emb|CAN70471.1|	5e-25	230	Vitis vinifera
NP568|NG_569|III	gi|28558781|gb|AAO45752.1|	5e-25	220	Cucumis melo subsp. melo
NP568|NG_569|III	gi|77554983|gb|ABA97779.1|	5e-25	234	Oryza sativa Japonica Group
NP568|NG_569|III	gi|62734186|gb|AAX96295.1|	6e-25	234	Oryza sativa Japonica Group
NP568|NG_569|III	gi|47824950|gb|AAT38724.1|	7e-25	227	Solanum demissum
NP568|NG_569|III	gi|923839380|ref|XP_013700362.1|	7e-25	217	Brassica napus
NP568|NG_569|III	gi|823145111|ref|XP_012472420.1|	8e-25	227	Gossypium raimondii
NP568|NG_569|III	gi|823241445|ref|XP_012453364.1|	8e-25	227	Gossypium raimondii
NP568|NG_569|III	gi|38569190|emb|CAE02978.3|	8e-25	234	Oryza sativa Japonica Group
NP568|NG_569|III	gi|77551549|gb|ABA94346.1|	8e-25	234	Oryza sativa Japonica Group
NP568|NG_569|III	gi|55168164|gb|AAV44031.1|	9e-25	234	Oryza sativa Japonica Group
NP568|NG_569|III	gi|116308998|emb|CAH66117.1|	9e-25	234	Oryza sativa Indica Group
NP568|NG_569|III	gi|38344008|emb|CAE03176.2|	9e-25	234	Oryza sativa Japonica Group
NP568|NG_569|III	gi|923771538|ref|XP_013679717.1|	9e-25	219	Brassica napus
NP568|NG_569|III	gi|147774273|emb|CAN76793.1|	9e-25	222	Vitis vinifera
NP568|NG_569|III	gi|923695612|ref|XP_013658015.1|	1e-24	222	Brassica napus
NP568|NG_569|III	gi|19881707|gb|AAM01108.1|AC098682_12	1e-24	234	Oryza sativa Japonica Group
NP568|NG_569|III	gi|116309082|emb|CAH66190.1|	1e-24	234	Oryza sativa Indica Group
NP568|NG_569|III	gi|38567733|emb|CAE76021.1|	1e-24	231	Oryza sativa Japonica Group
NP568|NG_569|III	gi|116309100|emb|CAH66206.1|	1e-24	234	Oryza sativa Indica Group
NP568|NG_569|III	gi|21742760|emb|CAD40516.1|	1e-24	234	Oryza sativa Japonica Group
NP568|NG_569|III	gi|727558943|ref|XP_010451711.1|	1e-24	233	Camelina sativa
NP568|NG_569|III	gi|50511449|gb|AAT77372.1|	1e-24	234	Oryza sativa Japonica Group
NP568|NG_569|III	gi|147866223|emb|CAN81986.1|	1e-24	225	Vitis vinifera
NP568|NG_569|III	gi|55733831|gb|AAV59338.1|	1e-24	235	Oryza sativa Japonica Group
NP568|NG_569|III	gi|50300548|gb|AAT73689.1|	1e-24	234	Oryza sativa Japonica Group
NP568|NG_569|III	gi|15217199|gb|AAK92543.1|AC051624_1	1e-24	234	Oryza sativa Japonica Group
NP568|NG_569|III	gi|39546223|emb|CAE04472.3|	1e-24	234	Oryza sativa Japonica Group
NP568|NG_569|III	gi|77555226|gb|ABA98022.1|	1e-24	234	Oryza sativa Japonica Group
NP568|NG_569|III	gi|77552331|gb|ABA95128.1|	1e-24	230	Oryza sativa Japonica Group
NP568|NG_569|III	gi|38345904|emb|CAE03548.2|	1e-24	234	Oryza sativa Japonica Group
NP568|NG_569|III	gi|78708144|gb|ABB47119.1|	2e-24	234	Oryza sativa Japonica Group
NP568|NG_569|III	gi|38347459|emb|CAD40090.2|	2e-24	230	Oryza sativa Japonica Group
NP568|NG_569|III	gi|21672035|gb|AAM74397.1|AC119149_12	2e-24	234	Oryza sativa Japonica Group
NP568|NG_569|III	gi|50878352|gb|AAT85127.1|	2e-24	234	Oryza sativa Japonica Group
NP568|NG_569|III	gi|571468654|ref|XP_006584384.1|	2e-24	234	Glycine max
NP568|NG_569|III	gi|915123359|ref|XP_013332943.1|	2e-24	222	Eimeria maxima
NP568|NG_569|III	gi|53981941|gb|AAV25059.1|	2e-24	234	Oryza sativa Japonica Group
NP568|NG_569|III	gi|77555408|gb|ABA98204.1|	2e-24	234	Oryza sativa Japonica Group
NP568|NG_569|III	gi|116309457|emb|CAH66529.1|	2e-24	234	Oryza sativa Indica Group
NP568|NG_569|III	gi|674229525|gb|KFK23310.1|	2e-24	230	Arabis alpina
NP568|NG_569|III	gi|15217216|gb|AAK92560.1|AC051624_18	2e-24	234	Oryza sativa Japonica Group
NP568|NG_569|III	gi|116309867|emb|CAH66904.1|	2e-24	234	Oryza sativa Indica Group
NP568|NG_569|III	gi|38346485|emb|CAE03724.2|	2e-24	231	Oryza sativa Japonica Group
NP568|NG_569|III	gi|22725899|gb|AAN04909.1|	2e-24	230	Oryza sativa Japonica Group
NP568|NG_569|III	gi|116311087|emb|CAH68016.1|	2e-24	234	Oryza sativa Indica Group
NP568|NG_569|III	gi|15217244|gb|AAK92588.1|AC074354_22	2e-24	230	Oryza sativa Japonica Group
NP568|NG_569|III	gi|147864527|emb|CAN80491.1|	2e-24	225	Vitis vinifera
NP568|NG_569|III	gi|116310873|emb|CAH67814.1|	2e-24	234	Oryza sativa Indica Group
NP568|NG_569|III	gi|77556354|gb|ABA99150.1|	2e-24	234	Oryza sativa Japonica Group
NP568|NG_569|III	gi|50872410|gb|AAT85010.1|	2e-24	234	Oryza sativa Japonica Group
NP568|NG_569|III	gi|77554637|gb|ABA97433.1|	2e-24	234	Oryza sativa Japonica Group
NP568|NG_569|III	gi|147839856|emb|CAN77191.1|	2e-24	228	Vitis vinifera
NP568|NG_569|III	gi|923912317|ref|XP_013725862.1|	2e-24	227	Brassica napus
NP568|NG_569|III	gi|62732760|gb|AAX94879.1|	2e-24	230	Oryza sativa Japonica Group
NP568|NG_569|III	gi|20042987|gb|AAM08795.1|AC090486_5	2e-24	234	Oryza sativa Japonica Group
NP568|NG_569|III	gi|28273360|gb|AAO38446.1|	2e-24	234	Oryza sativa Japonica Group
NP568|NG_569|III	gi|923824975|ref|XP_013695570.1|	2e-24	236	Brassica napus
NP568|NG_569|III	gi|53981942|gb|AAV25060.1|	2e-24	234	Oryza sativa Japonica Group
NP568|NG_569|III	gi|50080316|gb|AAT69650.1|	3e-24	234	Oryza sativa Japonica Group
NP568|NG_569|III	gi|848857712|ref|XP_012829796.1|	3e-24	227	Mimulus guttatus
NP568|NG_569|III	gi|15128451|dbj|BAB62635.1|	3e-24	234	Oryza sativa Japonica Group
NP568|NG_569|III	gi|38346425|emb|CAD40212.2|	3e-24	234	Oryza sativa Japonica Group
NP568|NG_569|III	gi|697188822|ref|XP_009603456.1|	3e-24	225	Nicotiana tomentosiformis
NP568|NG_569|III	gi|147810501|emb|CAN60890.1|	3e-24	225	Vitis vinifera
NP568|NG_569|III	gi|77555411|gb|ABA98207.1|	3e-24	234	Oryza sativa Japonica Group
NP568|NG_569|III	gi|62733353|gb|AAX95470.1|	3e-24	234	Oryza sativa Japonica Group
NP568|NG_569|III	gi|108708773|gb|ABF96568.1|	3e-24	234	Oryza sativa Japonica Group
NP568|NG_569|III	gi|77555641|gb|ABA98437.1|	3e-24	234	Oryza sativa Japonica Group
NP568|NG_569|III	gi|110289020|gb|ABB47439.2|	3e-24	230	Oryza sativa Japonica Group
NP568|NG_569|III	gi|62733354|gb|AAX95471.1|	3e-24	234	Oryza sativa Japonica Group
NP568|NG_569|III	gi|13129465|gb|AAK13123.1|AC080019_15	3e-24	230	Oryza sativa Japonica Group
NP568|NG_569|III	gi|18425251|gb|AAL69429.1|AC098565_11	3e-24	230	Oryza sativa;Oryza sativa Japonica Group
NP568|NG_569|III	gi|62734117|gb|AAX96226.1|	3e-24	234	Oryza sativa Japonica Group
NP568|NG_569|III	gi|38567683|emb|CAE75973.1|	3e-24	231	Oryza sativa Japonica Group
NP568|NG_569|III	gi|670419774|ref|XP_008650680.1|	3e-24	223	Zea mays
NP568|NG_569|III	gi|672171958|ref|XP_008806059.1|	3e-24	233	Phoenix dactylifera
NP568|NG_569|III	gi|53981935|gb|AAV25053.1|	3e-24	234	Oryza sativa Japonica Group
NP568|NG_569|III	gi|38347460|emb|CAD40089.2|	3e-24	228	Oryza sativa Japonica Group
NP568|NG_569|III	gi|77555436|gb|ABA98232.1|	4e-24	234	Oryza sativa Japonica Group
NP568|NG_569|III	gi|595793033|ref|XP_007200265.1|	4e-24	231	Prunus persica
NP568|NG_569|III	gi|110288739|gb|AAP52510.2|	4e-24	234	Oryza sativa Japonica Group
NP568|NG_569|III	gi|53981359|gb|AAV24913.1|	4e-24	234	Oryza sativa Japonica Group
NP568|NG_569|III	gi|387965727|gb|AFK13856.1|	4e-24	233	Beta vulgaris subsp. vulgaris
NP568|NG_569|III	gi|54287641|gb|AAV31385.1|	4e-24	234	Oryza sativa Japonica Group
NP568|NG_569|III	gi|22725995|gb|AAN04995.1|	4e-24	234	Oryza sativa Japonica Group
NP568|NG_569|III	gi|53981934|gb|AAV25052.1|	4e-24	234	Oryza sativa Japonica Group
NP568|NG_569|III	gi|21671933|gb|AAM74295.1|AC083944_13	4e-24	230	Oryza sativa Japonica Group
NP568|NG_569|III	gi|284434610|gb|ADB85337.1|	4e-24	227	Phyllostachys edulis
NP568|NG_569|III	gi|77555097|gb|ABA97893.1|	4e-24	228	Oryza sativa Japonica Group
NP568|NG_569|III	gi|32480328|emb|CAE02460.1|	4e-24	228	Oryza sativa Japonica Group
NP568|NG_569|III	gi|923854223|ref|XP_013704486.1|	4e-24	231	Brassica napus
NP568|NG_569|III	gi|116310689|emb|CAH67488.1|	4e-24	234	Oryza sativa Indica Group
NP568|NG_569|III	gi|48843822|gb|AAT47081.1|	4e-24	234	Oryza sativa Japonica Group
NP568|NG_569|III	gi|32487711|emb|CAE05388.1|	4e-24	230	Oryza sativa Japonica Group
NP568|NG_569|III	gi|108862521|gb|ABA97778.2|	4e-24	234	Oryza sativa Japonica Group
NP568|NG_569|III	gi|923654746|ref|XP_013645649.1|	4e-24	219	Brassica napus
NP568|NG_569|III	gi|828337339|ref|XP_012567311.1|	4e-24	226	Cicer arietinum
NP568|NG_569|III	gi|18657020|gb|AAL78107.1|AC093568_17	4e-24	234	Oryza sativa;Oryza sativa Japonica Group
NP568|NG_569|III	gi|77554007|gb|ABA96803.1|	5e-24	234	Oryza sativa Japonica Group
NP568|NG_569|III	gi|116309023|emb|CAH66138.1|	5e-24	234	Oryza sativa Indica Group
NP568|NG_569|III	gi|222635621|gb|EEE65753.1|	5e-24	222	Oryza sativa Japonica Group
NP568|NG_569|III	gi|62734487|gb|AAX96596.1|	5e-24	231	Oryza sativa Japonica Group
NP568|NG_569|III	gi|77551772|gb|ABA94569.1|	5e-24	234	Oryza sativa Japonica Group
NP568|NG_569|III	gi|23266283|gb|AAN16322.1|	5e-24	234	Oryza sativa Japonica Group
NP568|NG_569|III	gi|108862403|gb|ABA97246.2|	5e-24	231	Oryza sativa Japonica Group
NP568|NG_569|III	gi|108864644|gb|ABA95339.2|	5e-24	220	Oryza sativa Japonica Group
NP568|NG_569|III	gi|77549254|gb|ABA92051.1|	5e-24	234	Oryza sativa Japonica Group
NP568|NG_569|III	gi|113205218|gb|AAT39297.2|	5e-24	229	Solanum demissum
NP568|NG_569|III	gi|77555063|gb|ABA97859.1|	5e-24	231	Oryza sativa Japonica Group
NP568|NG_569|III	gi|21743213|emb|CAD40068.1|	5e-24	230	Oryza sativa Japonica Group
NP568|NG_569|III	gi|116309193|emb|CAH66288.1|	5e-24	234	Oryza sativa Indica Group
NP568|NG_569|III	gi|53981172|gb|AAV24812.1|	6e-24	237	Oryza sativa Japonica Group
NP568|NG_569|III	gi|62734534|gb|AAX96643.1|	6e-24	231	Oryza sativa Japonica Group
NP568|NG_569|III	gi|55168131|gb|AAV43998.1|	6e-24	230	Oryza sativa Japonica Group
NP568|NG_569|III	gi|108862586|gb|ABG22001.1|	6e-24	230	Oryza sativa Japonica Group
NP568|NG_569|III	gi|923594992|ref|XP_013739512.1|	6e-24	231	Brassica napus
NP568|NG_569|III	gi|77555030|gb|ABA97826.1|	6e-24	234	Oryza sativa Japonica Group
NP568|NG_569|III	gi|590667202|ref|XP_007037177.1|	6e-24	226	Theobroma cacao
NP568|NG_569|III	gi|58532097|emb|CAD40058.3|	6e-24	231	Oryza sativa Japonica Group
NP568|NG_569|III	gi|147860462|emb|CAN82562.1|	6e-24	226	Vitis vinifera
NP568|NG_569|III	gi|38344634|emb|CAE05067.2|	6e-24	230	Oryza sativa Japonica Group
NP568|NG_569|III	gi|78708468|gb|ABB47443.1|	6e-24	228	Oryza sativa Japonica Group
NP568|NG_569|III	gi|297605855|ref|NP_001057680.2|	6e-24	222	Oryza sativa Japonica Group
NP568|NG_569|III	gi|32490114|emb|CAE04950.1|	6e-24	230	Oryza sativa Japonica Group
NP568|NG_569|III	gi|147856403|emb|CAN80324.1|	6e-24	229	Vitis vinifera
NP568|NG_569|III	gi|38346551|emb|CAE02128.2|	7e-24	234	Oryza sativa Japonica Group
NP568|NG_569|III	gi|923519162|ref|XP_013660536.1|	7e-24	236	Brassica napus
NP568|NG_569|III	gi|13129460|gb|AAK13118.1|AC080019_10	7e-24	228	Oryza sativa Japonica Group
NP568|NG_569|III	gi|590692714|ref|XP_007044132.1|	7e-24	226	Theobroma cacao
NP568|NG_569|III	gi|38344617|emb|CAE02516.2|	7e-24	234	Oryza sativa Japonica Group
NP568|NG_569|III	gi|38347567|emb|CAE05000.2|	7e-24	231	Oryza sativa Japonica Group
NP568|NG_569|III	gi|55168105|gb|AAV43973.1|	7e-24	230	Oryza sativa Japonica Group
NP568|NG_569|III	gi|38344459|emb|CAE04930.2|	7e-24	228	Oryza sativa Japonica Group
NP568|NG_569|III	gi|77554807|gb|ABA97603.1|	7e-24	231	Oryza sativa Japonica Group
NP568|NG_569|III	gi|32489461|emb|CAE05815.1|	8e-24	231	Oryza sativa Japonica Group
NP568|NG_569|III	gi|21743220|emb|CAD40075.1|	8e-24	230	Oryza sativa Japonica Group
NP568|NG_569|III	gi|52353559|gb|AAU44125.1|	8e-24	228	Oryza sativa Japonica Group
NP568|NG_569|III	gi|38344376|emb|CAD41428.2|	8e-24	234	Oryza sativa Japonica Group
NP568|NG_569|III	gi|40736990|gb|AAR89003.1|	8e-24	231	Oryza sativa Japonica Group
NP568|NG_569|III	gi|50080333|gb|AAT69667.1|	8e-24	230	Oryza sativa Japonica Group
NP568|NG_569|III	gi|38347143|emb|CAE02432.2|	8e-24	234	Oryza sativa Japonica Group
NP568|NG_569|III	gi|108711739|gb|ABF99534.1|	8e-24	228	Oryza sativa Japonica Group
NP568|NG_569|III	gi|590729127|ref|XP_007099730.1|	8e-24	226	Theobroma cacao
NP568|NG_569|III	gi|108708504|gb|ABF96299.1|	8e-24	230	Oryza sativa Japonica Group
NP568|NG_569|III	gi|116311097|emb|CAH68025.1|	8e-24	230	Oryza sativa Indica Group
NP568|NG_569|III	gi|77555784|gb|ABA98580.1|	9e-24	230	Oryza sativa Japonica Group
NP568|NG_569|III	gi|78708466|gb|ABB47441.1|	9e-24	228	Oryza sativa Japonica Group
NP568|NG_569|III	gi|22725935|gb|AAN04945.1|	9e-24	230	Oryza sativa Japonica Group
NP568|NG_569|III	gi|116311006|emb|CAH67940.1|	9e-24	231	Oryza sativa Indica Group
NP568|NG_569|III	gi|116308901|emb|CAH66033.1|	9e-24	230	Oryza sativa Indica Group
NP568|NG_569|III	gi|40786567|gb|AAR89842.1|	9e-24	228	Oryza sativa Japonica Group
NP568|NG_569|III	gi|62733632|gb|AAX95749.1|	9e-24	230	Oryza sativa Japonica Group
NP568|NG_569|III	gi|77555322|gb|ABA98118.1|	1e-23	230	Oryza sativa Japonica Group
NP568|NG_569|III	gi|147775256|emb|CAN65836.1|	1e-23	232	Vitis vinifera
NP568|NG_569|III	gi|38567947|emb|CAE04776.3|	1e-23	230	Oryza sativa Japonica Group
NP568|NG_569|III	gi|4539660|gb|AAD22153.1|AF061282_6	1e-23	234	Sorghum bicolor
NP568|NG_569|III	gi|20177624|gb|AAM14679.1|AC097446_8	1e-23	230	Oryza sativa Japonica Group
NP568|NG_569|III	gi|116308982|emb|CAH66104.1|	1e-23	234	Oryza sativa Indica Group
NP568|NG_569|III	gi|62733376|gb|AAX95493.1|	1e-23	231	Oryza sativa Japonica Group
NP568|NG_569|III	gi|923614274|ref|XP_013745228.1|	1e-23	230	Brassica napus
NP568|NG_569|III	gi|110288888|gb|AAP53008.2|	1e-23	234	Oryza sativa Japonica Group
NP568|NG_569|III	gi|38347245|emb|CAD39358.2|	1e-23	234	Oryza sativa Japonica Group
NP568|NG_569|III	gi|19881742|gb|AAM01143.1|AC108884_25	1e-23	234	Oryza sativa Japonica Group
NP568|NG_569|III	gi|284434556|gb|ADB85304.1|	1e-23	231	Phyllostachys edulis
NP568|NG_569|III	gi|77555003|gb|ABA97799.1|	1e-23	231	Oryza sativa Japonica Group
NP568|NG_569|III	gi|13129464|gb|AAK13122.1|AC080019_14	1e-23	228	Oryza sativa Japonica Group
NP568|NG_569|III	gi|89887334|gb|ABD78322.1|	1e-23	230	Primula vulgaris
NP568|NG_569|III	gi|242117586|dbj|BAH80069.1|	1e-23	230	Oryza sativa Indica Group
NP568|NG_569|III	gi|922465109|ref|XP_013633118.1|	1e-23	230	Brassica oleracea var. oleracea
NP568|NG_569|III	gi|38347263|emb|CAE05310.2|	1e-23	230	Oryza sativa Japonica Group
NP568|NG_569|III	gi|674250951|gb|KFK43716.1|	1e-23	228	Arabis alpina
NP568|NG_569|III	gi|62734324|gb|AAX96433.1|	1e-23	230	Oryza sativa Japonica Group
NP568|NG_569|III	gi|52353726|gb|AAU44292.1|	1e-23	231	Oryza sativa Japonica Group
NP568|NG_569|III	gi|5302804|emb|CAB46045.1|	1e-23	219	Arabidopsis thaliana
NP568|NG_569|III	gi|57863932|gb|AAS90688.2|	1e-23	231	Oryza sativa Japonica Group
NP568|NG_569|III	gi|77554650|gb|ABA97446.1|	1e-23	231	Oryza sativa Japonica Group
NP568|NG_569|III	gi|57834137|emb|CAE05578.3|	1e-23	230	Oryza sativa Japonica Group
NP568|NG_569|III	gi|14018097|gb|AAK52160.1|AC084831_14	1e-23	228	Oryza sativa Japonica Group
NP568|NG_569|III	gi|108862750|gb|ABA98741.2|	1e-23	230	Oryza sativa Japonica Group
NP568|NG_569|III	gi|110288892|gb|ABG66013.1|	1e-23	230	Oryza sativa Japonica Group
NP568|NG_569|III	gi|16905208|gb|AAL31078.1|AC091749_7	1e-23	234	Oryza sativa Japonica Group
NP568|NG_569|III	gi|50838937|gb|AAT81698.1|	1e-23	230	Oryza sativa Japonica Group
NP568|NG_569|III	gi|62734156|gb|AAX96265.1|	1e-23	234	Oryza sativa Japonica Group
NP568|NG_569|III	gi|77552428|gb|ABA95225.1|	1e-23	230	Oryza sativa Japonica Group
NP568|NG_569|III	gi|22857578|gb|AAN09852.1|	1e-23	230	Oryza sativa Japonica Group
NP568|NG_569|III	gi|77556045|gb|ABA98841.1|	1e-23	230	Oryza sativa Japonica Group
NP568|NG_569|III	gi|16905211|gb|AAL31081.1|AC091749_10	1e-23	230	Oryza sativa Japonica Group
NP568|NG_569|III	gi|38344564|emb|CAD39906.2|	1e-23	231	Oryza sativa Japonica Group
NP568|NG_569|III	gi|77555398|gb|ABA98194.1|	1e-23	230	Oryza sativa Japonica Group
NP568|NG_569|III	gi|77552225|gb|ABA95022.1|	1e-23	230	Oryza sativa Japonica Group
NP568|NG_569|III	gi|51038165|gb|AAT93968.1|	1e-23	231	Oryza sativa Japonica Group
NP568|NG_569|III	gi|116308831|emb|CAH65969.1|	1e-23	230	Oryza sativa Indica Group
NP568|NG_569|III	gi|62734341|gb|AAX96450.1|	1e-23	234	Oryza sativa Japonica Group
NP568|NG_569|III	gi|58532064|emb|CAD40396.3|	1e-23	231	Oryza sativa Japonica Group
NP568|NG_569|III	gi|77555127|gb|ABA97923.1|	1e-23	230	Oryza sativa Japonica Group
NP568|NG_569|III	gi|110288769|gb|ABG65971.1|	1e-23	230	Oryza sativa Japonica Group
NP568|NG_569|III	gi|77555576|gb|ABA98372.1|	1e-23	230	Oryza sativa Japonica Group
NP568|NG_569|III	gi|77554997|gb|ABA97793.1|	1e-23	230	Oryza sativa Japonica Group
NP568|NG_569|III	gi|110289541|gb|AAP54937.2|	1e-23	217	Oryza sativa Japonica Group
NP568|NG_569|III	gi|50300545|gb|AAT73686.1|	1e-23	230	Oryza sativa Japonica Group
NP568|NG_569|III	gi|18657010|gb|AAL78097.1|AC093568_7	1e-23	230	Oryza sativa;Oryza sativa Japonica Group
NP568|NG_569|III	gi|38344461|emb|CAE04932.2|	1e-23	230	Oryza sativa Japonica Group
NP568|NG_569|III	gi|4680179|gb|AAD27547.1|AF111709_1	1e-23	234	Oryza sativa Indica Group
NP568|NG_569|III	gi|19225021|gb|AAL86497.1|AC099040_1	1e-23	230	Oryza sativa Japonica Group
NP568|NG_569|III	gi|50897341|gb|AAT85792.1|	2e-23	228	Oryza sativa Japonica Group
NP568|NG_569|III	gi|55168118|gb|AAV43985.1|	2e-23	228	Oryza sativa Japonica Group
NP568|NG_569|III	gi|77554975|gb|ABA97771.1|	2e-23	230	Oryza sativa Japonica Group
NP568|NG_569|III	gi|15042815|gb|AAK82438.1|AC091247_5	2e-23	234	Oryza sativa Japonica Group
NP568|NG_569|III	gi|590633659|ref|XP_007028165.1|	2e-23	226	Theobroma cacao
NP568|NG_569|III	gi|108708187|gb|ABF95982.1|	2e-23	231	Oryza sativa Japonica Group
NP568|NG_569|III	gi|923633874|ref|XP_013751663.1|	2e-23	228	Brassica napus
NP568|NG_569|III	gi|38346366|emb|CAE04203.2|	2e-23	230	Oryza sativa Japonica Group
NP568|NG_569|III	gi|110288811|gb|AAP52698.2|	2e-23	230	Oryza sativa Japonica Group
NP568|NG_569|III	gi|78708031|gb|ABB47006.1|	2e-23	230	Oryza sativa Japonica Group
NP568|NG_569|III	gi|38344639|emb|CAE05072.2|	2e-23	230	Oryza sativa Japonica Group
NP568|NG_569|III	gi|116308884|emb|CAH66018.1|	2e-23	230	Oryza sativa Indica Group
NP568|NG_569|III	gi|77553962|gb|ABA96758.1|	2e-23	230	Oryza sativa Japonica Group
NP568|NG_569|III	gi|77555610|gb|ABA98406.1|	2e-23	234	Oryza sativa Japonica Group
NP568|NG_569|III	gi|674230206|gb|KFK23991.1|	2e-23	229	Arabis alpina
NP568|NG_569|III	gi|685323767|ref|XP_009151550.1|	2e-23	232	Brassica rapa
NP568|NG_569|III	gi|38345526|emb|CAD41296.2|	2e-23	231	Oryza sativa Japonica Group
NP568|NG_569|III	gi|22539088|gb|AAN01260.1|	2e-23	234	Oryza sativa Japonica Group
NP568|NG_569|III	gi|923851487|ref|XP_013704088.1|	2e-23	236	Brassica napus
NP568|NG_569|III	gi|38346421|emb|CAD40208.2|	2e-23	230	Oryza sativa Japonica Group
NP568|NG_569|III	gi|38347553|emb|CAD39388.2|	2e-23	230	Oryza sativa Japonica Group
NP568|NG_569|III	gi|116309026|emb|CAH66141.1|	2e-23	231	Oryza sativa Indica Group
NP568|NG_569|III	gi|19881755|gb|AAM01156.1|AC113336_8	2e-23	231	Oryza sativa Japonica Group
NP568|NG_569|III	gi|50838904|gb|AAT81665.1|	2e-23	230	Oryza sativa Japonica Group
NP568|NG_569|III	gi|15217338|gb|AAK92676.1|AC090714_9	2e-23	234	Oryza sativa Japonica Group
NP568|NG_569|III	gi|77552426|gb|ABA95223.1|	2e-23	230	Oryza sativa Japonica Group
NP568|NG_569|III	gi|5001453|gb|AAD37020.1|	2e-23	226	Arabidopsis thaliana
NP568|NG_569|III	gi|590729162|ref|XP_007099735.1|	2e-23	226	Theobroma cacao
NP568|NG_569|III	gi|22138474|gb|AAM93458.1|	2e-23	230	Oryza sativa Japonica Group
NP568|NG_569|III	gi|78708041|gb|ABB47016.1|	2e-23	230	Oryza sativa Japonica Group
NP568|NG_569|III	gi|19225016|gb|AAL86492.1|AC077693_31	2e-23	234	Oryza sativa Japonica Group
NP568|NG_569|III	gi|78708482|gb|ABB47457.1|	2e-23	234	Oryza sativa Japonica Group
NP568|NG_569|III	gi|22539073|gb|AAN01245.1|	2e-23	230	Oryza sativa Japonica Group
NP568|NG_569|III	gi|53981184|gb|AAV24824.1|	2e-23	230	Oryza sativa Japonica Group
NP568|NG_569|III	gi|108708202|gb|ABF95997.1|	2e-23	230	Oryza sativa Japonica Group
NP568|NG_569|III	gi|110289611|gb|AAP55099.2|	2e-23	234	Oryza sativa Japonica Group
NP568|NG_569|III	gi|261865347|gb|ACY01928.1|	2e-23	235	Beta vulgaris
NP568|NG_569|III	gi|108862342|gb|ABA96234.2|	2e-23	230	Oryza sativa Japonica Group
NP568|NG_569|III	gi|110288767|gb|AAP52585.2|	2e-23	230	Oryza sativa Japonica Group
NP568|NG_569|III	gi|22857594|gb|AAN09868.1|	2e-23	230	Oryza sativa Japonica Group
NP568|NG_569|III	gi|58532040|emb|CAE05093.3|	2e-23	230	Oryza sativa Japonica Group
NP568|NG_569|III	gi|20177623|gb|AAM14678.1|AC097446_7	2e-23	230	Oryza sativa Japonica Group
NP568|NG_569|III	gi|18997227|gb|AAL83344.1|AC074282_11	2e-23	230	Oryza sativa Japonica Group
NP568|NG_569|III	gi|115461396|ref|NP_001054298.1|	2e-23	220	Oryza sativa Japonica Group
NP568|NG_569|III	gi|13129427|gb|AAK13085.1|AC078839_1	2e-23	234	Oryza sativa Japonica Group
NP568|NG_569|III	gi|916513325|ref|XP_013356828.1|	2e-23	222	Eimeria mitis
NP568|NG_569|III	gi|116311004|emb|CAH67938.1|	2e-23	230	Oryza sativa Indica Group
NP568|NG_569|III	gi|20503033|gb|AAM22721.1|AC092388_5	2e-23	231	Oryza sativa Japonica Group
NP568|NG_569|III	gi|674230208|gb|KFK23993.1|	2e-23	229	Arabis alpina
NP568|NG_569|III	gi|78708216|gb|ABB47191.1|	2e-23	230	Oryza sativa Japonica Group
NP568|NG_569|III	gi|116317768|emb|CAH65747.1|	2e-23	230	Oryza sativa Indica Group
NP568|NG_569|III	gi|108707255|gb|ABF95050.1|	2e-23	230	Oryza sativa Japonica Group
NP568|NG_569|III	gi|53981932|gb|AAV25050.1|	2e-23	230	Oryza sativa Japonica Group
NP568|NG_569|III	gi|38347259|emb|CAE05306.2|	3e-23	230	Oryza sativa Japonica Group
NP568|NG_569|III	gi|50300539|gb|AAT73680.1|	3e-23	230	Oryza sativa Japonica Group
NP568|NG_569|III	gi|77555470|gb|ABA98266.1|	3e-23	230	Oryza sativa Japonica Group
NP568|NG_569|III	gi|77553944|gb|ABA96740.1|	3e-23	234	Oryza sativa Japonica Group
NP568|NG_569|III	gi|22725933|gb|AAN04943.1|	3e-23	230	Oryza sativa Japonica Group
NP568|NG_569|III	gi|78708033|gb|ABB47008.1|	3e-23	230	Oryza sativa Japonica Group
NP568|NG_569|III	gi|32492359|emb|CAE05990.1|	3e-23	237	Oryza sativa Japonica Group
NP568|NG_569|III	gi|923883626|ref|XP_013713541.1|	3e-23	216	Brassica napus
NP568|NG_569|III	gi|50300553|gb|AAT73694.1|	3e-23	230	Oryza sativa Japonica Group
NP568|NG_569|III	gi|51091547|dbj|BAD36284.1|	3e-23	231	Oryza sativa Japonica Group
NP568|NG_569|III	gi|937918275|dbj|BAS93193.1|	3e-23	230	Oryza sativa Japonica Group
NP568|NG_569|III	gi|21742535|emb|CAD40160.1|	3e-23	228	Oryza sativa Japonica Group
NP568|NG_569|III	gi|38346261|emb|CAE02083.2|	3e-23	234	Oryza sativa Japonica Group
NP568|NG_569|III	gi|56407688|gb|AAV88076.1|	3e-23	229	Ipomoea batatas
NP568|NG_569|III	gi|590629865|ref|XP_007027109.1|	3e-23	218	Theobroma cacao
NP568|NG_569|III	gi|38343985|emb|CAD40451.2|	3e-23	230	Oryza sativa Japonica Group
NP568|NG_569|III	gi|54287530|gb|AAV31274.1|	3e-23	230	Oryza sativa Japonica Group
NP568|NG_569|III	gi|77550763|gb|ABA93560.1|	3e-23	230	Oryza sativa Japonica Group
NP568|NG_569|III	gi|78708035|gb|ABB47010.1|	3e-23	230	Oryza sativa Japonica Group
NP568|NG_569|III	gi|116309169|emb|CAH66267.1|	3e-23	230	Oryza sativa Indica Group
NP568|NG_569|III	gi|22857586|gb|AAN09860.1|	3e-23	230	Oryza sativa Japonica Group
NP568|NG_569|III	gi|54291803|gb|AAV32172.1|	3e-23	230	Oryza sativa Japonica Group
NP568|NG_569|III	gi|110288804|gb|ABG65986.1|	3e-23	230	Oryza sativa Japonica Group
NP568|NG_569|III	gi|62733085|gb|AAX95202.1|	3e-23	230	Oryza sativa Japonica Group
NP568|NG_569|III	gi|57863933|gb|AAS90689.2|	3e-23	234	Oryza sativa Japonica Group
NP568|NG_569|III	gi|108708200|gb|ABF95995.1|	3e-23	230	Oryza sativa Japonica Group
NP568|NG_569|III	gi|108708189|gb|ABF95984.1|	3e-23	230	Oryza sativa Japonica Group
NP568|NG_569|III	gi|50878348|gb|AAT85123.1|	3e-23	234	Oryza sativa Japonica Group
NP568|NG_569|III	gi|116311093|emb|CAH68022.1|	3e-23	230	Oryza sativa Indica Group
NP568|NG_569|III	gi|110288765|gb|ABG65969.1|	3e-23	230	Oryza sativa Japonica Group
NP568|NG_569|III	gi|108862564|gb|ABA97616.2|	3e-23	231	Oryza sativa Japonica Group
NP568|NG_569|III	gi|77549436|gb|ABA92233.1|	3e-23	230	Oryza sativa Japonica Group
NP568|NG_569|III	gi|77554505|gb|ABA97301.1|	3e-23	230	Oryza sativa Japonica Group
NP568|NG_569|III	gi|18652533|gb|AAL77166.1|AC091732_17	3e-23	227	Oryza sativa Japonica Group
NP568|NG_569|III	gi|77555686|gb|ABA98482.1|	3e-23	230	Oryza sativa Japonica Group
NP568|NG_569|III	gi|62733803|gb|AAX95912.1|	3e-23	233	Oryza sativa Japonica Group
NP568|NG_569|III	gi|13992680|gb|AAK51574.1|AC022352_10	3e-23	230	Oryza sativa Japonica Group
NP568|NG_569|III	gi|50300503|gb|AAT73646.1|	3e-23	230	Oryza sativa Japonica Group
NP568|NG_569|III	gi|62733144|gb|AAX95261.1|	3e-23	231	Oryza sativa Japonica Group
NP568|NG_569|III	gi|38344635|emb|CAE05068.2|	3e-23	230	Oryza sativa Japonica Group
NP568|NG_569|III	gi|670441722|ref|XP_008661174.1|	3e-23	235	Zea mays
NP568|NG_569|III	gi|38344464|emb|CAE04935.2|	3e-23	230	Oryza sativa Japonica Group
NP568|NG_569|III	gi|34015248|gb|AAQ56440.1|	4e-23	236	Oryza sativa Japonica Group
NP568|NG_569|III	gi|50878466|gb|AAT85240.1|	4e-23	230	Oryza sativa Japonica Group
NP568|NG_569|III	gi|62701790|gb|AAX92863.1|	4e-23	229	Oryza sativa Japonica Group
NP568|NG_569|III	gi|90265167|emb|CAH67735.1|	4e-23	230	Oryza sativa Indica Group
NP568|NG_569|III	gi|77555016|gb|ABA97812.1|	4e-23	234	Oryza sativa Japonica Group
NP568|NG_569|III	gi|20177640|gb|AAM14695.1|AC097446_24	4e-23	230	Oryza sativa Japonica Group
NP568|NG_569|III	gi|21672037|gb|AAM74399.1|AC119149_14	4e-23	230	Oryza sativa Japonica Group
NP568|NG_569|III	gi|110288626|gb|ABB46774.2|	4e-23	230	Oryza sativa Japonica Group
NP568|NG_569|III	gi|147779107|emb|CAN73467.1|	4e-23	231	Vitis vinifera
NP568|NG_569|III	gi|38346588|emb|CAE04652.2|	4e-23	230	Oryza sativa Japonica Group
NP568|NG_569|III	gi|116309091|emb|CAH66198.1|	4e-23	230	Oryza sativa Indica Group
NP568|NG_569|III	gi|672184357|ref|XP_008812486.1|	4e-23	237	Phoenix dactylifera
NP568|NG_569|III	gi|116309157|emb|CAH66257.1|	4e-23	230	Oryza sativa Indica Group
NP568|NG_569|III	gi|108709591|gb|ABF97386.1|	4e-23	234	Oryza sativa Japonica Group
NP568|NG_569|III	gi|77556423|gb|ABA99219.1|	4e-23	230	Oryza sativa Japonica Group
NP568|NG_569|III	gi|108710200|gb|ABF97995.1|	4e-23	224	Oryza sativa Japonica Group
NP568|NG_569|III	gi|50300512|gb|AAT73655.1|	4e-23	230	Oryza sativa Japonica Group
NP568|NG_569|III	gi|77554545|gb|ABA97341.1|	4e-23	230	Oryza sativa Japonica Group
NP568|NG_569|III	gi|743913832|ref|XP_011000836.1|	4e-23	231	Populus euphratica
NP568|NG_569|III	gi|54287622|gb|AAV31366.1|	4e-23	230	Oryza sativa Japonica Group
NP568|NG_569|III	gi|77553948|gb|ABA96744.1|	4e-23	230	Oryza sativa Japonica Group
NP568|NG_569|III	gi|31126663|gb|AAP44586.1|	4e-23	229	Oryza sativa Japonica Group
NP568|NG_569|III	gi|37991885|gb|AAR06331.1|	5e-23	234	Oryza sativa Japonica Group
NP568|NG_569|III	gi|77554977|gb|ABA97773.1|	5e-23	230	Oryza sativa Japonica Group
NP568|NG_569|III	gi|77555643|gb|ABA98439.1|	5e-23	230	Oryza sativa Japonica Group
NP568|NG_569|III	gi|38346696|emb|CAE02181.2|	5e-23	234	Oryza sativa Japonica Group
NP568|NG_569|III	gi|116309001|emb|CAH66120.1|	5e-23	230	Oryza sativa Indica Group
NP568|NG_569|III	gi|54287627|gb|AAV31371.1|	5e-23	230	Oryza sativa Japonica Group
NP568|NG_569|III	gi|828338055|ref|XP_012567460.1|	5e-23	226	Cicer arietinum
NP568|NG_569|III	gi|22725911|gb|AAN04921.1|	5e-23	230	Oryza sativa Japonica Group
NP568|NG_569|III	gi|116309635|emb|CAH66687.1|	5e-23	230	Oryza sativa Indica Group
NP568|NG_569|III	gi|923672787|ref|XP_013651248.1|	5e-23	229	Brassica napus
NP568|NG_569|III	gi|38344714|emb|CAE05256.2|	5e-23	231	Oryza sativa Japonica Group
NP568|NG_569|III	gi|62732819|gb|AAX94938.1|	5e-23	227	Oryza sativa Japonica Group
NP568|NG_569|III	gi|77555395|gb|ABA98191.1|	5e-23	230	Oryza sativa Japonica Group
NP568|NG_569|III	gi|729344250|ref|XP_010541181.1|	5e-23	233	Cleome hassleriana
NP568|NG_569|III	gi|70720826|emb|CAD39549.2|	5e-23	230	Oryza sativa Japonica Group
NP568|NG_569|III	gi|116309152|emb|CAH66252.1|	6e-23	230	Oryza sativa Indica Group
NP568|NG_569|III	gi|116309702|emb|CAH66749.1|	6e-23	230	Oryza sativa Indica Group
NP568|NG_569|III	gi|674228403|gb|KFK22188.1|	6e-23	219	Arabis alpina
NP568|NG_569|III	gi|590568709|ref|XP_007010873.1|	6e-23	226	Theobroma cacao
NP568|NG_569|III	gi|50080282|gb|AAT69617.1|	6e-23	231	Oryza sativa Japonica Group
NP568|NG_569|III	gi|21740445|emb|CAD41630.1|	6e-23	228	Oryza sativa Japonica Group
NP568|NG_569|III	gi|77555174|gb|ABA97970.1|	6e-23	239	Oryza sativa Japonica Group
NP568|NG_569|III	gi|18568267|gb|AAL75999.1|AF466646_7	6e-23	225	Zea mays
NP568|NG_569|III	gi|147852240|emb|CAN80132.1|	6e-23	200	Vitis vinifera
NP568|NG_569|III	gi|116310099|emb|CAH67119.1|	6e-23	228	Oryza sativa Indica Group
NP568|NG_569|III	gi|147819718|emb|CAN73574.1|	6e-23	235	Vitis vinifera
NP568|NG_569|III	gi|55733883|gb|AAV59390.1|	6e-23	234	Oryza sativa Japonica Group
NP568|NG_569|III	gi|77553291|gb|ABA96087.1|	6e-23	230	Oryza sativa Japonica Group
NP568|NG_569|III	gi|62734416|gb|AAX96525.1|	6e-23	231	Oryza sativa Japonica Group
NP568|NG_569|III	gi|21741597|emb|CAD39713.1|	6e-23	230	Oryza sativa Japonica Group
NP568|NG_569|III	gi|55168121|gb|AAV43988.1|	6e-23	230	Oryza sativa Japonica Group
NP568|NG_569|III	gi|34015262|gb|AAQ56454.1|	7e-23	230	Oryza sativa Japonica Group
NP568|NG_569|III	gi|108708199|gb|ABF95994.1|	7e-23	230	Oryza sativa Japonica Group
NP568|NG_569|III	gi|731369977|ref|XP_010665582.1|	7e-23	219	Beta vulgaris subsp. vulgaris
NP568|NG_569|III	gi|77556493|gb|ABA99289.1|	7e-23	230	Oryza sativa Japonica Group
NP568|NG_569|III	gi|110289018|gb|ABB47435.2|	7e-23	231	Oryza sativa Japonica Group
NP568|NG_569|III	gi|22138463|gb|AAM93447.1|	7e-23	231	Oryza sativa Japonica Group
NP568|NG_569|III	gi|18652528|gb|AAL77161.1|AC091732_12	7e-23	231	Oryza sativa Japonica Group
NP568|NG_569|III	gi|108864167|gb|ABA92246.2|	7e-23	230	Oryza sativa Japonica Group
NP568|NG_569|III	gi|110289019|gb|ABB47436.2|	7e-23	227	Oryza sativa Japonica Group
NP568|NG_569|III	gi|57834136|emb|CAE05577.3|	7e-23	230	Oryza sativa Japonica Group
NP568|NG_569|III	gi|58532106|emb|CAD40067.3|	7e-23	234	Oryza sativa Japonica Group
NP568|NG_569|III	gi|77553256|gb|ABA96052.1|	7e-23	225	Oryza sativa Japonica Group
NP568|NG_569|III	gi|77556441|gb|ABA99237.1|	8e-23	230	Oryza sativa Japonica Group
NP568|NG_569|III	gi|325182114|emb|CCA16567.1|	8e-23	222	Albugo laibachii Nc14
NP568|NG_569|III	gi|108864659|gb|ABA95357.2|	8e-23	220	Oryza sativa Japonica Group
NP568|NG_569|III	gi|147834299|emb|CAN74305.1|	8e-23	229	Vitis vinifera
NP568|NG_569|III	gi|52353706|gb|AAU44272.1|	8e-23	231	Oryza sativa Japonica Group
NP568|NG_569|III	gi|46485886|gb|AAS98511.1|	8e-23	230	Oryza sativa Japonica Group
NP568|NG_569|III	gi|78707853|gb|ABB46828.1|	8e-23	230	Oryza sativa Japonica Group
NP568|NG_569|III	gi|590617570|ref|XP_007023829.1|	8e-23	219	Theobroma cacao
NP568|NG_569|III	gi|15217255|gb|AAK92599.1|AC078944_10	9e-23	234	Oryza sativa Japonica Group
NP568|NG_569|III	gi|116310133|emb|CAH67149.1|	9e-23	230	Oryza sativa Indica Group
NP568|NG_569|III	gi|29244670|gb|AAO73263.1|	9e-23	230	Oryza sativa Japonica Group
NP568|NG_569|III	gi|116309666|emb|CAH66715.1|	1e-22	231	Oryza sativa Indica Group
NP568|NG_569|III	gi|19881651|gb|AAM01052.1|AC091735_25	1e-22	228	Oryza sativa Japonica Group
NP568|NG_569|III	gi|32492194|emb|CAE03534.1|	1e-22	231	Oryza sativa Japonica Group
NP568|NG_569|III	gi|116309189|emb|CAH66284.1|	1e-22	230	Oryza sativa Indica Group
NP568|NG_569|III	gi|78708088|gb|ABB47063.1|	1e-22	228	Oryza sativa Japonica Group
NP568|NG_569|III	gi|90265240|emb|CAH67693.1|	1e-22	230	Oryza sativa Indica Group
NP568|NG_569|III	gi|22725909|gb|AAN04919.1|	1e-22	234	Oryza sativa Japonica Group
NP568|NG_569|III	gi|108708179|gb|ABF95974.1|	1e-22	230	Oryza sativa Japonica Group
NP568|NG_569|III	gi|670401952|ref|XP_008680841.1|	1e-22	229	Zea mays
NP568|NG_569|III	gi|38346259|emb|CAE02081.2|	1e-22	230	Oryza sativa Japonica Group
NP568|NG_569|III	gi|595790803|ref|XP_007199150.1|	1e-22	230	Prunus persica
NP568|NG_569|III	gi|729404887|ref|XP_010554912.1|	1e-22	232	Cleome hassleriana
NP568|NG_569|III	gi|674248029|gb|KFK40794.1|	1e-22	228	Arabis alpina
NP568|NG_569|III	gi|18652524|gb|AAL77157.1|AC091732_8	1e-22	232	Oryza sativa Japonica Group
NP568|NG_569|III	gi|731374472|ref|XP_010666975.1|	1e-22	215	Beta vulgaris subsp. vulgaris
NP568|NG_569|III	gi|54287544|gb|AAV31288.1|	1e-22	230	Oryza sativa Japonica Group
NP568|NG_569|III	gi|62734703|gb|AAX96812.1|	1e-22	228	Oryza sativa Japonica Group
NP568|NG_569|III	gi|54287629|gb|AAV31373.1|	1e-22	234	Oryza sativa Japonica Group
NP568|NG_569|III	gi|47824970|gb|AAT38744.1|	1e-22	212	Solanum demissum
NP568|NG_569|III	gi|110288854|gb|ABB47095.2|	1e-22	231	Oryza sativa Japonica Group
NP568|NG_569|III	gi|27552560|gb|AAO19383.1|	1e-22	231	Oryza sativa Japonica Group
NP568|NG_569|III	gi|50878384|gb|AAT85159.1|	1e-22	228	Oryza sativa Japonica Group
NP568|NG_569|III	gi|31415958|gb|AAP50978.1|	1e-22	234	Oryza sativa Japonica Group
NP568|NG_569|III	gi|53370677|gb|AAU89172.1|	1e-22	231	Oryza sativa Japonica Group
NP568|NG_569|III	gi|13992686|gb|AAK51580.1|AC022352_16	1e-22	231	Oryza sativa Japonica Group
NP568|NG_569|III	gi|147807800|emb|CAN71056.1|	1e-22	220	Vitis vinifera
NP568|NG_569|III	gi|78707944|gb|ABB46919.1|	1e-22	231	Oryza sativa Japonica Group
NP568|NG_569|III	gi|674243675|gb|KFK36440.1|	1e-22	229	Arabis alpina
NP568|NG_569|III	gi|108709963|gb|ABF97758.1|	1e-22	231	Oryza sativa Japonica Group
NP568|NG_569|III	gi|54287529|gb|AAV31273.1|	1e-22	230	Oryza sativa Japonica Group
NP8|NG_8|I	gi|891595628|ref|XM_013169107.1|	0.049	35	Schizosaccharomyces cryophilus OY26
NP111|NG_111|I	gi|891582445|ref|XM_013166750.1|	0.004	30	Schizosaccharomyces cryophilus OY26
NP111|NG_111|I	gi|891575794|ref|XM_013165856.1|	0.03	52	Schizosaccharomyces cryophilus OY26
NP111|NG_111|I	gi|891595743|ref|XM_013169162.1|	0.043	37	Schizosaccharomyces cryophilus OY26
NP274|NG_275|III	gi|891565657|ref|XM_013163614.1|	0.045	46	Schizosaccharomyces octosporus yFS286
NP354|NG_355|I	gi|891602255|ref|XM_013170241.1|	0.013	45	Schizosaccharomyces cryophilus OY26
NP354|NG_355|I	gi|891545614|ref|XM_013160940.1|	0.014	45	Schizosaccharomyces octosporus yFS286
NP553|NG_554|II	gi|891579018|ref|XM_013165373.1|	8.79e-21	107	Schizosaccharomyces octosporus yFS286
NP553|NG_554|II	gi|891586056|ref|XM_013167517.1|	5.5e-19	107	Schizosaccharomyces cryophilus OY26
NP553|NG_554|II	gi|891565525|ref|XM_013163548.1|	3.03e-15	111	Schizosaccharomyces octosporus yFS286
NP553|NG_554|II	gi|891595747|ref|XM_013169164.1|	3.4e-13	109	Schizosaccharomyces cryophilus OY26
NP553|NG_554|II	gi|745751436|ref|XM_002173316.2|	3.67e-09	74	Schizosaccharomyces japonicus yFS275
NP553|NG_554|II	gi|213401444|ref|XM_002171459.1|	2.97e-05	68	Schizosaccharomyces japonicus yFS275
NP568|NG_569|III	gi|891582318|ref|XM_013166699.1|	1.17e-47	233	Schizosaccharomyces cryophilus OY26
NP568|NG_569|III	gi|891585983|ref|XM_013167488.1|	1.06e-42	225	Schizosaccharomyces cryophilus OY26
NP568|NG_569|III	gi|891582278|ref|XM_013166679.1|	7.92e-36	189	Schizosaccharomyces cryophilus OY26
NP568|NG_569|III	gi|927347882|gb|KT447435.1|	1.76e-32	217	Schizosaccharomyces japonicus
NP568|NG_569|III	gi|392858827|gb|JQ735908.1|	1.72e-29	184	Schizosaccharomyces japonicus
NP730|NG_I_138|III	gi|19682862|emb|AJ439454.1|	3.17e-13	30	Cloning vector pSMUG+degron
NP131|NG_131|II	gi|615399218|ref|XM_007579660.1|	0.029	47	Neofusicoccum parvum UCRNP2
NP553|NG_554|II	gi|630036298|ref|XM_007841143.1|	1.03e-05	79	Pestalotiopsis fici W106-1
NP553|NG_554|II	gi|918812870|ref|XM_013571856.1|	1.06e-05	83	Aureobasidium pullulans var. namibiae CBS 147.97
NP553|NG_554|II	gi|517312918|emb|HF679025.1|	1.79e-05	65	Fusarium fujikuroi IMI 58289
NP553|NG_554|II	gi|636762786|ref|XM_008085376.1|	7.77e-05	65	Glarea lozoyensis ATCC 20868
NP553|NG_554|II	gi|915041481|ref|XM_013400677.1|	0.000181	64	Exophiala aquamarina CBS 119918
NP553|NG_554|II	gi|685864816|ref|XM_009261166.1|	0.000272	79	Fusarium pseudograminearum CS3096
NP553|NG_554|II	gi|758210393|ref|XM_011329063.1|	0.000301	79	Fusarium graminearum PH-1
NP553|NG_554|II	gi|255945604|ref|XM_002563524.1|	0.000337	79	Penicillium chrysogenum Wisconsin 54-1255
NP553|NG_554|II	gi|699031042|emb|HG970335.1|	0.000477	79	Fusarium graminearum
NP553|NG_554|II	gi|302888963|ref|XM_003043322.1|	0.0005	79	Nectria haematococca mpVI 77-13-4
NP553|NG_554|II	gi|211587300|emb|AM920435.1|	0.00061	83	Penicillium chrysogenum Wisconsin 54-1255
NP553|NG_554|II	gi|156058985|ref|XM_001595366.1|	0.000778	69	Sclerotinia sclerotiorum 1980 UF-70
NP553|NG_554|II	gi|597583258|ref|XM_007294624.1|	0.000818	67	Marssonina brunnea f. sp. 'multigermtubi' MB_m1
NP553|NG_554|II	gi|615416520|ref|XM_007585186.1|	0.000883	74	Neofusicoccum parvum UCRNP2
NP553|NG_554|II	gi|573990474|ref|XM_006673095.1|	0.001	75	Cordyceps militaris CM01
NP553|NG_554|II	gi|169603677|ref|XM_001795208.1|	0.001	65	Phaeosphaeria nodorum SN15
NP553|NG_554|II	gi|259484215|tpe|BN001305.1|	0.001	77	Aspergillus nidulans FGSC A4
NP553|NG_554|II	gi|154296607|ref|XM_001548684.1|	0.001	77	Botryotinia fuckeliana B05.10
NP553|NG_554|II	gi|630040008|ref|XM_007842610.1|	0.001	72	Pestalotiopsis fici W106-1
NP553|NG_554|II	gi|589112536|ref|XM_006968229.1|	0.002	72	Trichoderma reesei QM6a
NP553|NG_554|II	gi|753718537|gb|CP009812.1|	0.002	77	Botryotinia fuckeliana B05.10
NP553|NG_554|II	gi|630038290|ref|XM_007841921.1|	0.002	76	Pestalotiopsis fici W106-1
NP553|NG_554|II	gi|325974172|emb|FQ790265.1|	0.002	77	Botryotinia fuckeliana T4
NP553|NG_554|II	gi|398393237|ref|XM_003850030.1|	0.002	55	Zymoseptoria tritici IPO323
NP553|NG_554|II	gi|627810718|ref|XM_007680517.1|	0.003	65	Baudoinia compniacensis UAMH 10762
NP553|NG_554|II	gi|927427909|ref|XM_014104311.1|	0.003	74	Trichoderma virens Gv29-8
NP553|NG_554|II	gi|927387994|ref|XM_014084368.1|	0.003	72	Trichoderma atroviride IMI 206040
NP553|NG_554|II	gi|927405846|ref|XM_014094030.1|	0.003	72	Trichoderma virens Gv29-8
NP553|NG_554|II	gi|636751614|ref|XM_008079790.1|	0.003	72	Glarea lozoyensis ATCC 20868
NP553|NG_554|II	gi|302893908|ref|XM_003045789.1|	0.005	77	Nectria haematococca mpVI 77-13-4
NP553|NG_554|II	gi|628233728|ref|XM_007724250.1|	0.005	65	Capronia coronata CBS 617.96
NP553|NG_554|II	gi|684170999|ref|XM_009161122.1|	0.005	65	Exophiala dermatitidis NIH/UT8656
NP553|NG_554|II	gi|115384307|ref|XM_001208701.1|	0.005	73	Aspergillus terreus NIH2624
NP553|NG_554|II	gi|116208605|ref|XM_001230111.1|	0.005	69	Chaetomium globosum CBS 148.51
NP553|NG_554|II	gi|631236915|ref|XM_007915189.1|	0.006	73	Togninia minima UCRPA7
NP553|NG_554|II	gi|154315518|ref|XM_001557032.1|	0.006	65	Botryotinia fuckeliana B05.10
NP553|NG_554|II	gi|915701804|ref|XM_013491246.1|	0.006	64	Aureobasidium subglaciale EXF-2481
NP553|NG_554|II	gi|238508229|ref|XM_002385273.1|	0.006	82	Aspergillus flavus NRRL3357
NP553|NG_554|II	gi|631241629|ref|XM_007917546.1|	0.008	49	Togninia minima UCRPA7
NP553|NG_554|II	gi|396470935|ref|XM_003838701.1|	0.008	83	Leptosphaeria maculans JN3
NP553|NG_554|II	gi|702073665|emb|FO906012.1|	0.009	83	Leptosphaeria maculans 'lepidii' group
NP553|NG_554|II	gi|628310027|ref|XM_007737068.1|	0.011	69	Capronia epimyces CBS 606.96
NP553|NG_554|II	gi|615419450|ref|XM_007586114.1|	0.011	65	Neofusicoccum parvum UCRNP2
NP553|NG_554|II	gi|918819779|ref|XM_013573543.1|	0.011	65	Aureobasidium pullulans var. namibiae CBS 147.97
NP553|NG_554|II	gi|748528728|ref|XM_011129922.1|	0.011	47	Arthrobotrys oligospora ATCC 24927
NP553|NG_554|II	gi|396474549|ref|NW_003533866.1|	0.012	83	Leptosphaeria biglobosa 'brassicae' group;Leptosphaeria maculans JN3
NP553|NG_554|II	gi|702067665|emb|FO906637.1|	0.012	83	Leptosphaeria biglobosa 'brassicae' group
NP553|NG_554|II	gi|630006592|ref|XM_007829091.1|	0.013	67	Pestalotiopsis fici W106-1
NP553|NG_554|II	gi|807745732|ref|XM_012322271.1|	0.014	80	Fibroporia radiculosa
NP553|NG_554|II	gi|238504569|ref|XM_002383475.1|	0.014	79	Aspergillus flavus NRRL3357
NP553|NG_554|II	gi|317137991|ref|XM_001816534.2|	0.015	79	Aspergillus oryzae RIB40
NP553|NG_554|II	gi|685407756|ref|XM_009224473.1|	0.015	67	Gaeumannomyces graminis var. tritici R3-111a-1
NP553|NG_554|II	gi|317035052|ref|XM_001400943.2|	0.016	53	Aspergillus niger CBS 513.88
NP553|NG_554|II	gi|930412296|ref|XM_014324946.1|	0.017	101	Trichosporon asahii var. asahii CBS 2479
NP553|NG_554|II	gi|517320210|emb|HF679029.1|	0.02	67	Fusarium fujikuroi IMI 58289
NP553|NG_554|II	gi|930141633|ref|XM_014315748.1|	0.021	65	Grosmannia clavigera kw1407
NP553|NG_554|II	gi|615468424|ref|XM_007600170.1|	0.022	49	Colletotrichum fioriniae PJ7
NP553|NG_554|II	gi|628319272|ref|XM_007738349.1|	0.023	73	Capronia epimyces CBS 606.96
NP553|NG_554|II	gi|628294104|ref|XM_007759379.1|	0.024	49	Cladophialophora yegresii CBS 114405
NP553|NG_554|II	gi|134081593|emb|AM270320.1|	0.026	84	Aspergillus niger
NP553|NG_554|II	gi|83764382|dbj|AP007150.1|	0.028	80	Aspergillus oryzae RIB40
NP553|NG_554|II	gi|115398661|ref|XM_001214920.1|	0.031	80	Aspergillus terreus NIH2624
NP553|NG_554|II	gi|915178801|ref|XM_013460690.1|	0.034	54	Exophiala xenobiotica
NP553|NG_554|II	gi|915093743|ref|XM_013429257.1|	0.035	65	Fonsecaea pedrosoi CBS 271.37
NP553|NG_554|II	gi|596728435|ref|XM_007287595.1|	0.036	49	Colletotrichum gloeosporioides Nara gc5
NP553|NG_554|II	gi|629654540|ref|XM_007794122.1|	0.036	75	Eutypa lata UCREL1
NP553|NG_554|II	gi|671144011|ref|XM_008713230.1|	0.036	70	Cyphellophora europaea CBS 101466
NP553|NG_554|II	gi|671166569|ref|XM_008725529.1|	0.036	55	Cladophialophora carrionii CBS 160.54
NP553|NG_554|II	gi|628278892|ref|XM_007733718.1|	0.037	67	Capronia epimyces CBS 606.96
NP553|NG_554|II	gi|169784591|ref|XM_001826705.1|	0.039	83	Aspergillus oryzae RIB40
NP553|NG_554|II	gi|685407754|ref|XM_009224472.1|	0.041	48	Gaeumannomyces graminis var. tritici R3-111a-1
NP553|NG_554|II	gi|154296726|ref|XM_001548743.1|	0.041	56	Botryotinia fuckeliana B05.10
NP553|NG_554|II	gi|325974234|emb|FQ790327.1|	0.043	56	Botryotinia fuckeliana T4
NP553|NG_554|II	gi|753718544|gb|CP009819.1|	0.043	56	Botryotinia fuckeliana B05.10
NP553|NG_554|II	gi|628300455|ref|XM_007761137.1|	0.05	61	Cladophialophora yegresii CBS 114405
NP568|NG_569|III	gi|673530945|emb|HG529770.1|	4.16e-29	224	Melanopsichium pennsylvanicum 4
NP568|NG_569|III	gi|915127958|ref|XM_013467812.1|	2.18e-27	224	Rasamsonia emersonii CBS 393.64
NP568|NG_569|III	gi|315039286|ref|XM_003168975.1|	4.28e-27	226	Arthroderma gypseum CBS 118893
NP568|NG_569|III	gi|154274258|ref|XM_001537931.1|	9.18e-26	220	Ajellomyces capsulatus NAm1
NP568|NG_569|III	gi|270356898|gb|GU131351.1|	1.09e-25	243	Filobasidiella depauperata
NP568|NG_569|III	gi|599126448|gb|KJ526184.1|	1.2e-25	218	Moniliophthora perniciosa
NP568|NG_569|III	gi|154286145|ref|XM_001543818.1|	1.3e-25	220	Ajellomyces capsulatus NAm1
NP568|NG_569|III	gi|315042436|ref|XM_003170547.1|	1.55e-25	226	Arthroderma gypseum CBS 118893
NP568|NG_569|III	gi|154271797|ref|XM_001536702.1|	1.63e-25	220	Ajellomyces capsulatus NAm1
NP568|NG_569|III	gi|154284877|ref|XM_001543184.1|	4.82e-25	227	Ajellomyces capsulatus NAm1
NP568|NG_569|III	gi|154275789|ref|XM_001538690.1|	6.19e-25	227	Ajellomyces capsulatus NAm1
NP568|NG_569|III	gi|154272635|ref|XM_001537120.1|	6.27e-25	227	Ajellomyces capsulatus NAm1
NP568|NG_569|III	gi|154271533|ref|XM_001536570.1|	6.32e-25	227	Ajellomyces capsulatus NAm1
NP568|NG_569|III	gi|154285337|ref|XM_001543414.1|	6.43e-25	227	Ajellomyces capsulatus NAm1
NP568|NG_569|III	gi|154271287|ref|XM_001536447.1|	1.46e-24	227	Ajellomyces capsulatus NAm1
NP568|NG_569|III	gi|154287241|ref|XM_001544366.1|	1.74e-24	227	Ajellomyces capsulatus NAm1
NP568|NG_569|III	gi|630207690|ref|XM_007855768.1|	2.25e-24	224	Moniliophthora roreri MCA 2997
NP568|NG_569|III	gi|599126455|gb|KJ526191.1|	5.73e-24	218	Moniliophthora perniciosa
NP568|NG_569|III	gi|71143209|gb|AC165066.2|	6.71e-24	216	Phakopsora pachyrhizi
NP568|NG_569|III	gi|630203025|ref|XM_007854245.1|	7.48e-24	231	Moniliophthora roreri MCA 2997
NP568|NG_569|III	gi|630225536|ref|XM_007861579.1|	9.98e-24	231	Moniliophthora roreri MCA 2997
NP568|NG_569|III	gi|630217230|ref|XM_007858860.1|	1.17e-23	224	Moniliophthora roreri MCA 2997
NP568|NG_569|III	gi|630220097|ref|XM_007859790.1|	1.38e-23	228	Moniliophthora roreri MCA 2997
NP568|NG_569|III	gi|630217430|ref|XM_007858925.1|	1.42e-23	223	Moniliophthora roreri MCA 2997
NP568|NG_569|III	gi|372477913|gb|JN639897.1|	1.53e-23	224	Magnaporthe oryzae
NP568|NG_569|III	gi|94540561|gb|DQ493941.1|	2.65e-23	224	Magnaporthe oryzae 70-15
NP568|NG_569|III	gi|317141365|ref|XM_001818452.2|	3.14e-23	223	Aspergillus oryzae RIB40
NP568|NG_569|III	gi|317138874|ref|XM_003189048.1|	3.14e-23	223	Aspergillus oryzae RIB40
NP568|NG_569|III	gi|389636823|ref|XM_003716009.1|	3.19e-23	224	Magnaporthe oryzae 70-15
NP568|NG_569|III	gi|630218839|ref|XM_007859383.1|	3.71e-23	231	Moniliophthora roreri MCA 2997
NP568|NG_569|III	gi|630220478|ref|XM_007859916.1|	3.76e-23	222	Moniliophthora roreri MCA 2997
NP568|NG_569|III	gi|90704869|gb|AC170156.2|	3.89e-23	227	Phakopsora pachyrhizi
NP568|NG_569|III	gi|389636818|ref|XM_003716007.1|	3.92e-23	220	Magnaporthe oryzae 70-15
NP568|NG_569|III	gi|78190024|gb|AC149348.2|	4.53e-23	216	Phakopsora pachyrhizi
NP568|NG_569|III	gi|116812685|gb|AC188870.2|	4.57e-23	216	Phakopsora pachyrhizi
NP568|NG_569|III	gi|630225385|ref|XM_007861530.1|	4.87e-23	231	Moniliophthora roreri MCA 2997
NP568|NG_569|III	gi|83764382|dbj|AP007150.1|	5e-23	223	Aspergillus oryzae RIB40
NP568|NG_569|III	gi|83764984|dbj|AP007151.1|	5e-23	223	Aspergillus oryzae RIB40
NP568|NG_569|III	gi|88900525|gb|AC170151.2|	5.03e-23	212	Phakopsora pachyrhizi
NP568|NG_569|III	gi|56542299|gb|AC149366.2|	5.05e-23	216	Phakopsora pachyrhizi
NP568|NG_569|III	gi|90704868|gb|AC170153.2|	5.93e-23	216	Phakopsora pachyrhizi
NP568|NG_569|III	gi|112181229|gb|AC188884.2|	6.13e-23	227	Phakopsora pachyrhizi
NP568|NG_569|III	gi|389636820|ref|XM_003716008.1|	6.9e-23	220	Magnaporthe oryzae 70-15
NP568|NG_569|III	gi|389636816|ref|XM_003716006.1|	7.1e-23	220	Magnaporthe oryzae 70-15
NP568|NG_569|III	gi|106520563|gb|AC149406.2|	8.07e-23	223	Phakopsora pachyrhizi
NP568|NG_569|III	gi|94540566|gb|DQ493946.1|	1.05e-22	224	Magnaporthe oryzae 70-15
NP568|NG_569|III	gi|94540563|gb|DQ493943.1|	1.06e-22	224	Magnaporthe oryzae 70-15
NP568|NG_569|III	gi|71143200|gb|AC165049.2|	1.11e-22	216	Phakopsora pachyrhizi
NP568|NG_569|III	gi|768311755|gb|CP010983.1|	1.11e-22	224	Verticillium dahliae VdLs.17
NP568|NG_569|III	gi|820657128|emb|LN483166.1|	1.13e-22	218	Xanthophyllomyces dendrorhous
NP568|NG_569|III	gi|154275975|ref|XM_001538783.1|	1.18e-22	238	Ajellomyces capsulatus NAm1
NP568|NG_569|III	gi|630225486|ref|XM_007861563.1|	1.34e-22	231	Moniliophthora roreri MCA 2997
NP568|NG_569|III	gi|630225514|ref|XM_007861572.1|	1.35e-22	231	Moniliophthora roreri MCA 2997
NP568|NG_569|III	gi|56044576|gb|AC149337.2|	1.36e-22	212	Phakopsora pachyrhizi
NP568|NG_569|III	gi|116812687|gb|AC188883.2|	1.37e-22	216	Phakopsora pachyrhizi
NP568|NG_569|III	gi|114158750|gb|AC188849.2|	1.37e-22	216	Phakopsora pachyrhizi
NP568|NG_569|III	gi|78190026|gb|AC149402.2|	1.39e-22	216	Phakopsora pachyrhizi
NP568|NG_569|III	gi|83753112|gb|AY485786.2|	1.41e-22	223	Aspergillus flavus
NP568|NG_569|III	gi|154277047|ref|XM_001539319.1|	1.42e-22	234	Ajellomyces capsulatus NAm1
NP568|NG_569|III	gi|154280836|ref|XM_001541181.1|	1.52e-22	234	Ajellomyces capsulatus NAm1
NP568|NG_569|III	gi|154283812|ref|XM_001542652.1|	1.55e-22	234	Ajellomyces capsulatus NAm1
NP568|NG_569|III	gi|58219668|gb|AC149327.2|	1.66e-22	223	Phakopsora pachyrhizi
NP568|NG_569|III	gi|56410620|gb|AC149324.2|	1.88e-22	223	Phakopsora pachyrhizi
NP568|NG_569|III	gi|347003384|gb|CP003013.1|	2.09e-22	226	Thielavia terrestris NRRL 8126
NP568|NG_569|III	gi|347000997|gb|CP003011.1|	2.09e-22	226	Thielavia terrestris NRRL 8126
NP568|NG_569|III	gi|346998423|gb|CP003010.1|	2.09e-22	226	Thielavia terrestris NRRL 8126
NP568|NG_569|III	gi|346995772|gb|CP003009.1|	2.09e-22	226	Thielavia terrestris NRRL 8126
NP568|NG_569|III	gi|242826074|ref|XM_002488523.1|	2.13e-22	223	Talaromyces stipitatus ATCC 10500
NP568|NG_569|III	gi|630216136|ref|XM_007858507.1|	2.51e-22	228	Moniliophthora roreri MCA 2997
NP568|NG_569|III	gi|48056261|gb|AC149372.1|	2.71e-22	227	Phakopsora pachyrhizi
NP568|NG_569|III	gi|510695|gb|L34658.1|FSOGAGPOL	2.86e-22	225	Fusarium oxysporum
NP568|NG_569|III	gi|154269861|ref|XM_001535780.1|	3.22e-22	252	Ajellomyces capsulatus NAm1
NP568|NG_569|III	gi|630188620|ref|XM_007849587.1|	3.28e-22	226	Moniliophthora roreri MCA 2997
NP568|NG_569|III	gi|329351117|gb|HM852746.1|	3.86e-22	224	Verticillium dahliae VdLs.17
NP568|NG_569|III	gi|52627273|gb|AC119572.26|	4e-22	223	Ustilago hordei
NP568|NG_569|III	gi|89267063|emb|AM118080.1|	4.02e-22	223	Ustilago hordei
NP568|NG_569|III	gi|66773523|gb|AC149410.2|	4.1e-22	227	Phakopsora pachyrhizi
NP568|NG_569|III	gi|66773524|gb|AC149415.2|	4.12e-22	223	Phakopsora pachyrhizi
NP568|NG_569|III	gi|71143202|gb|AC165051.2|	4.46e-22	223	Phakopsora pachyrhizi
NP568|NG_569|III	gi|56606227|gb|AC149418.2|	4.53e-22	227	Phakopsora pachyrhizi
NP568|NG_569|III	gi|768311757|gb|CP010985.1|	4.59e-22	224	Verticillium dahliae VdLs.17
NP568|NG_569|III	gi|65134956|gb|AC114900.26|	4.66e-22	226	Ustilago hordei
NP568|NG_569|III	gi|308818287|gb|AC242785.1|	4.71e-22	230	Postia placenta
NP568|NG_569|III	gi|768311758|gb|CP010986.1|	4.81e-22	224	Verticillium dahliae VdLs.17
NP568|NG_569|III	gi|768311759|gb|CP010987.1|	4.81e-22	224	Verticillium dahliae VdLs.17
NP568|NG_569|III	gi|675324093|gb|CP009081.1|	4.81e-22	224	Verticillium dahliae JR2
NP568|NG_569|III	gi|675324088|gb|CP009076.1|	4.81e-22	224	Verticillium dahliae JR2
NP568|NG_569|III	gi|768311756|gb|CP010984.1|	4.81e-22	224	Verticillium dahliae VdLs.17
NP568|NG_569|III	gi|675324092|gb|CP009080.1|	4.81e-22	224	Verticillium dahliae JR2
NP568|NG_569|III	gi|675324090|gb|CP009078.1|	4.81e-22	224	Verticillium dahliae JR2
NP568|NG_569|III	gi|675324091|gb|CP009079.1|	4.81e-22	224	Verticillium dahliae JR2
NP568|NG_569|III	gi|768311754|gb|CP010982.1|	4.81e-22	224	Verticillium dahliae VdLs.17
NP568|NG_569|III	gi|768311752|gb|CP010980.1|	4.81e-22	224	Verticillium dahliae VdLs.17
NP568|NG_569|III	gi|768311753|gb|CP010981.1|	4.81e-22	224	Verticillium dahliae VdLs.17
NP568|NG_569|III	gi|675324087|gb|CP009075.1|	4.81e-22	224	Verticillium dahliae JR2
NP568|NG_569|III	gi|630221965|ref|XM_007860412.1|	4.84e-22	224	Moniliophthora roreri MCA 2997
NP568|NG_569|III	gi|154283546|ref|XM_001542519.1|	4.84e-22	252	Ajellomyces capsulatus NAm1
NP568|NG_569|III	gi|242794480|ref|XM_002482338.1|	5.2e-22	223	Talaromyces stipitatus ATCC 10500
NP568|NG_569|III	gi|114053380|gb|AC188865.2|	6.12e-22	212	Phakopsora pachyrhizi
NP568|NG_569|III	gi|21263313|gb|AC114899.5|	6.38e-22	223	Ustilago hordei
NP568|NG_569|III	gi|30725966|gb|AC116560.5|	6.38e-22	223	Ustilago hordei
NP568|NG_569|III	gi|308818254|gb|AC242752.1|	7.08e-22	230	Postia placenta
NP568|NG_569|III	gi|114145815|gb|AC188859.2|	7.39e-22	212	Phakopsora pachyrhizi
NP568|NG_569|III	gi|673530908|emb|HG529748.1|	7.76e-22	224	Melanopsichium pennsylvanicum 4
NP568|NG_569|III	gi|630225270|ref|XM_007861492.1|	7.89e-22	231	Moniliophthora roreri MCA 2997
NP568|NG_569|III	gi|630222855|ref|XM_007860703.1|	8.1e-22	226	Moniliophthora roreri MCA 2997
NP568|NG_569|III	gi|154277303|ref|XM_001539443.1|	8.49e-22	252	Ajellomyces capsulatus NAm1
NP568|NG_569|III	gi|154281590|ref|XM_001541558.1|	8.51e-22	252	Ajellomyces capsulatus NAm1
NP568|NG_569|III	gi|154278903|ref|XM_001540215.1|	8.68e-22	252	Ajellomyces capsulatus NAm1
NP568|NG_569|III	gi|154272651|ref|XM_001537128.1|	8.73e-22	252	Ajellomyces capsulatus NAm1
NP568|NG_569|III	gi|154285267|ref|XM_001543379.1|	8.94e-22	252	Ajellomyces capsulatus NAm1
NP568|NG_569|III	gi|154284983|ref|XM_001543237.1|	9.19e-22	252	Ajellomyces capsulatus NAm1
NP568|NG_569|III	gi|630212500|ref|XM_007857328.1|	1.06e-21	225	Moniliophthora roreri MCA 2997
NP568|NG_569|III	gi|336255828|ref|XM_003343259.1|	1.06e-21	213	Sordaria macrospora k-hell
NP568|NG_569|III	gi|154287235|ref|XM_001544363.1|	1.28e-21	252	Ajellomyces capsulatus NAm1
NP568|NG_569|III	gi|630223054|ref|XM_007860769.1|	1.37e-21	226	Moniliophthora roreri MCA 2997
NP568|NG_569|III	gi|154288187|ref|XM_001544839.1|	1.38e-21	252	Ajellomyces capsulatus NAm1
NP568|NG_569|III	gi|630220718|ref|XM_007859993.1|	1.41e-21	224	Moniliophthora roreri MCA 2997
NP568|NG_569|III	gi|310616767|gb|AC242893.1|	1.43e-21	230	Postia placenta
NP568|NG_569|III	gi|820654388|emb|LN483124.1|	1.43e-21	217	Xanthophyllomyces dendrorhous
NP568|NG_569|III	gi|675324094|gb|CP009082.1|	1.64e-21	226	Verticillium dahliae JR2
NP568|NG_569|III	gi|675324089|gb|CP009077.1|	1.64e-21	226	Verticillium dahliae JR2
NP568|NG_569|III	gi|10946130|gb|AF264028.1|	1.72e-21	226	Colletotrichum gloeosporioides
NP568|NG_569|III	gi|599126460|gb|KJ526195.1|	1.74e-21	218	Moniliophthora perniciosa
NP568|NG_569|III	gi|60360996|gb|AC149404.2|	1.84e-21	212	Phakopsora pachyrhizi
NP568|NG_569|III	gi|56606224|gb|AC149405.2|	1.91e-21	216	Phakopsora pachyrhizi
NP568|NG_569|III	gi|630221829|ref|XM_007860365.1|	2.09e-21	209	Moniliophthora roreri MCA 2997
NP568|NG_569|III	gi|308818263|gb|AC242761.1|	2.1e-21	230	Postia placenta
NP568|NG_569|III	gi|329351120|gb|HM852747.1|	2.2e-21	226	Verticillium dahliae VdLs.17
NP568|NG_569|III	gi|114145818|gb|AC188876.2|	2.36e-21	212	Phakopsora pachyrhizi
NP568|NG_569|III	gi|60678295|gb|AC149314.2|	2.54e-21	212	Phakopsora pachyrhizi
NP568|NG_569|III	gi|156065842|ref|XM_001598793.1|	2.77e-21	229	Sclerotinia sclerotiorum 1980 UF-70
NP568|NG_569|III	gi|88900526|gb|AC170160.2|	2.79e-21	212	Phakopsora pachyrhizi
NP568|NG_569|III	gi|630221723|ref|XM_007860330.1|	2.81e-21	211	Moniliophthora roreri MCA 2997
NP568|NG_569|III	gi|24636595|dbj|AB095265.1|	2.88e-21	224	Verticillium dahliae
NP568|NG_569|III	gi|589269985|ref|XM_007000661.1|	2.9e-21	217	Tremella mesenterica DSM 1558
NP568|NG_569|III	gi|308818256|gb|AC242754.1|	3.11e-21	230	Postia placenta
NP568|NG_569|III	gi|308818266|gb|AC242764.1|	3.2e-21	230	Postia placenta
NP568|NG_569|III	gi|61656222|gb|AC158470.1|	3.25e-21	230	Postia placenta
NP568|NG_569|III	gi|308818253|gb|AC242751.1|	3.29e-21	230	Postia placenta
NP568|NG_569|III	gi|109638766|gb|AC149345.2|	3.44e-21	212	Phakopsora pachyrhizi
NP568|NG_569|III	gi|116812681|gb|AC188850.2|	3.5e-21	212	Phakopsora pachyrhizi
NP568|NG_569|III	gi|78271980|gb|AC170158.2|	3.52e-21	212	Phakopsora pachyrhizi
NP568|NG_569|III	gi|308818247|gb|AC242745.1|	3.64e-21	230	Postia placenta
NP568|NG_569|III	gi|310616768|gb|AC242894.1|	3.78e-21	230	Postia placenta
NP568|NG_569|III	gi|308818264|gb|AC242762.1|	4.12e-21	230	Postia placenta
NP568|NG_569|III	gi|58219669|gb|AC149335.2|	4.19e-21	212	Phakopsora pachyrhizi
NP568|NG_569|III	gi|54633351|gb|AC149377.2|	4.26e-21	216	Phakopsora pachyrhizi
NP568|NG_569|III	gi|85060522|gb|AC165058.2|	4.38e-21	212	Phakopsora pachyrhizi
NP568|NG_569|III	gi|336270819|ref|XM_003350121.1|	4.69e-21	213	Sordaria macrospora k-hell
NP568|NG_569|III	gi|308818289|gb|AC242787.1|	5.21e-21	230	Postia placenta
NP568|NG_569|III	gi|630223248|ref|XM_007860832.1|	5.79e-21	226	Moniliophthora roreri MCA 2997
NP568|NG_569|III	gi|589273095|ref|XM_007002216.1|	5.93e-21	217	Tremella mesenterica DSM 1558
NP568|NG_569|III	gi|630221143|ref|XM_007860136.1|	6.2e-21	226	Moniliophthora roreri MCA 2997
NP568|NG_569|III	gi|73760473|gb|AC165059.2|	7.3e-21	242	Phakopsora pachyrhizi
NP568|NG_569|III	gi|61966973|gb|AC158477.2|	7.36e-21	230	Postia placenta
NP568|NG_569|III	gi|589270167|ref|XM_007000752.1|	7.38e-21	217	Tremella mesenterica DSM 1558
NP568|NG_569|III	gi|154282096|ref|XM_001541811.1|	7.49e-21	193	Ajellomyces capsulatus NAm1
NP568|NG_569|III	gi|630192627|ref|XM_007850871.1|	7.87e-21	225	Moniliophthora roreri MCA 2997
NP568|NG_569|III	gi|308818255|gb|AC242753.1|	8.71e-21	211	Postia placenta
NP568|NG_569|III	gi|308818259|gb|AC242757.1|	9.3e-21	226	Postia placenta
NP568|NG_569|III	gi|308818298|gb|AC242796.1|	9.32e-21	230	Postia placenta
NP568|NG_569|III	gi|753718535|gb|CP009810.1|	9.85e-21	227	Botryotinia fuckeliana B05.10
NP568|NG_569|III	gi|71143201|gb|AC165050.2|	1e-20	211	Phakopsora pachyrhizi
NP568|NG_569|III	gi|308818297|gb|AC242795.1|	1.14e-20	211	Postia placenta
NP568|NG_569|III	gi|599126446|gb|KJ526182.1|	1.18e-20	203	Moniliophthora perniciosa
NP568|NG_569|III	gi|317141085|ref|XM_003189284.1|	1.22e-20	228	Aspergillus oryzae RIB40
NP568|NG_569|III	gi|308818244|gb|AC242742.1|	1.23e-20	211	Postia placenta
NP568|NG_569|III	gi|308818251|gb|AC242749.1|	1.24e-20	211	Postia placenta
NP568|NG_569|III	gi|589273109|ref|XM_007002223.1|	1.38e-20	227	Tremella mesenterica DSM 1558
NP568|NG_569|III	gi|630180615|ref|XM_007847021.1|	1.53e-20	226	Moniliophthora roreri MCA 2997
NP568|NG_569|III	gi|589269999|ref|XM_007000668.1|	1.53e-20	217	Tremella mesenterica DSM 1558
NP568|NG_569|III	gi|336241553|ref|XM_003342804.1|	1.56e-20	220	Sordaria macrospora k-hell
NP568|NG_569|III	gi|630225379|ref|XM_007861528.1|	1.57e-20	231	Moniliophthora roreri MCA 2997
NP568|NG_569|III	gi|48055818|gb|AC149315.1|	1.68e-20	212	Phakopsora pachyrhizi
NP568|NG_569|III	gi|599126459|gb|KJ526194.1|	1.72e-20	218	Moniliophthora perniciosa
NP568|NG_569|III	gi|630224997|ref|XM_007861403.1|	1.83e-20	226	Moniliophthora roreri MCA 2997
NP568|NG_569|III	gi|58036541|gb|AC149384.2|	1.94e-20	223	Phakopsora pachyrhizi
NP568|NG_569|III	gi|753718542|gb|CP009817.1|	2.04e-20	227	Botryotinia fuckeliana B05.10
NP568|NG_569|III	gi|753718537|gb|CP009812.1|	2.04e-20	227	Botryotinia fuckeliana B05.10
NP568|NG_569|III	gi|753718531|gb|CP009806.1|	2.04e-20	227	Botryotinia fuckeliana B05.10
NP568|NG_569|III	gi|58197696|gb|AC149351.2|	2.06e-20	207	Phakopsora pachyrhizi
NP568|NG_569|III	gi|154289799|ref|XM_001545456.1|	2.12e-20	227	Botryotinia fuckeliana B05.10
NP568|NG_569|III	gi|154290729|ref|XM_001545906.1|	2.31e-20	227	Botryotinia fuckeliana B05.10
NP568|NG_569|III	gi|630221672|ref|XM_007860313.1|	2.33e-20	226	Moniliophthora roreri MCA 2997
NP568|NG_569|III	gi|329351123|gb|HM852748.1|	2.33e-20	224	Verticillium dahliae VdLs.17
NP568|NG_569|III	gi|308818260|gb|AC242758.1|	2.54e-20	211	Postia placenta
NP568|NG_569|III	gi|385145212|emb|HE600069.1|	2.6e-20	220	Neurospora sublineolata
NP568|NG_569|III	gi|630200248|ref|XM_007853335.1|	2.68e-20	228	Moniliophthora roreri MCA 2997
NP568|NG_569|III	gi|156059421|ref|XM_001595584.1|	2.72e-20	227	Sclerotinia sclerotiorum 1980 UF-70
NP568|NG_569|III	gi|589269961|ref|XM_007000649.1|	2.95e-20	227	Tremella mesenterica DSM 1558
NP568|NG_569|III	gi|308818281|gb|AC242779.1|	2.99e-20	226	Postia placenta
NP568|NG_569|III	gi|589273093|ref|XM_007002215.1|	3.03e-20	227	Tremella mesenterica DSM 1558
NP568|NG_569|III	gi|753718540|gb|CP009815.1|	3.05e-20	227	Botryotinia fuckeliana B05.10
NP568|NG_569|III	gi|753718541|gb|CP009816.1|	3.23e-20	227	Botryotinia fuckeliana B05.10
NP568|NG_569|III	gi|116194681|ref|XM_001223152.1|	3.3e-20	219	Chaetomium globosum CBS 148.51
NP568|NG_569|III	gi|154296534|ref|XM_001548648.1|	3.37e-20	227	Botryotinia fuckeliana B05.10
NP568|NG_569|III	gi|753718543|gb|CP009818.1|	3.38e-20	227	Botryotinia fuckeliana B05.10
NP568|NG_569|III	gi|630181454|ref|XM_007847294.1|	3.4e-20	223	Moniliophthora roreri MCA 2997
NP568|NG_569|III	gi|630220728|ref|XM_007859996.1|	3.6e-20	226	Moniliophthora roreri MCA 2997
NP568|NG_569|III	gi|148839392|gb|AC188869.2|	3.91e-20	216	Phakopsora pachyrhizi
NP568|NG_569|III	gi|630221419|ref|XM_007860230.1|	3.96e-20	226	Moniliophthora roreri MCA 2997
NP568|NG_569|III	gi|630194445|ref|XM_007851454.1|	3.99e-20	231	Moniliophthora roreri MCA 2997
NP568|NG_569|III	gi|753718530|gb|CP009805.1|	4.25e-20	227	Botryotinia fuckeliana B05.10
NP568|NG_569|III	gi|753718534|gb|CP009809.1|	4.58e-20	227	Botryotinia fuckeliana B05.10
NP568|NG_569|III	gi|589273105|ref|XM_007002221.1|	4.86e-20	217	Tremella mesenterica DSM 1558
NP568|NG_569|III	gi|308818274|gb|AC242772.1|	5.06e-20	230	Postia placenta
NP568|NG_569|III	gi|630223516|ref|XM_007860920.1|	5.09e-20	206	Moniliophthora roreri MCA 2997
NP568|NG_569|III	gi|56461824|gb|AC149364.2|	5.13e-20	212	Phakopsora pachyrhizi
NP568|NG_569|III	gi|54654138|gb|AC149397.2|	5.6e-20	239	Phakopsora pachyrhizi
NP568|NG_569|III	gi|599126458|gb|KJ526193.1|	5.88e-20	215	Moniliophthora perniciosa
NP568|NG_569|III	gi|315041356|ref|XM_003170007.1|	6.52e-20	227	Arthroderma gypseum CBS 118893
NP568|NG_569|III	gi|630223550|ref|XM_007860931.1|	9e-20	226	Moniliophthora roreri MCA 2997
NP568|NG_569|III	gi|242816501|ref|XM_002486746.1|	9.18e-20	241	Talaromyces stipitatus ATCC 10500
NP568|NG_569|III	gi|630217340|ref|XM_007858896.1|	9.27e-20	224	Moniliophthora roreri MCA 2997
NP568|NG_569|III	gi|317159453|ref|XM_003191026.1|	1.06e-19	228	Aspergillus oryzae RIB40
NP568|NG_569|III	gi|317138876|ref|XM_003189049.1|	1.06e-19	228	Aspergillus oryzae RIB40
NP568|NG_569|III	gi|630222040|ref|XM_007860437.1|	1.08e-19	224	Moniliophthora roreri MCA 2997
NP568|NG_569|III	gi|48056389|gb|AC149389.1|	1.08e-19	239	Phakopsora pachyrhizi
NP568|NG_569|III	gi|589273101|ref|XM_007002219.1|	1.11e-19	202	Tremella mesenterica DSM 1558
NP568|NG_569|III	gi|317158527|ref|XM_003190935.1|	1.13e-19	228	Aspergillus oryzae RIB40
NP568|NG_569|III	gi|317158448|ref|XM_003190921.1|	1.17e-19	228	Aspergillus oryzae RIB40
NP568|NG_569|III	gi|317146487|ref|XM_003189767.1|	1.17e-19	228	Aspergillus oryzae RIB40
NP568|NG_569|III	gi|78271977|gb|AC170149.2|	1.19e-19	216	Phakopsora pachyrhizi
NP568|NG_569|III	gi|630210460|ref|XM_007856669.1|	1.25e-19	224	Moniliophthora roreri MCA 2997
NP568|NG_569|III	gi|630221657|ref|XM_007860307.1|	1.28e-19	226	Moniliophthora roreri MCA 2997
NP568|NG_569|III	gi|630203496|ref|XM_007854400.1|	1.36e-19	226	Moniliophthora roreri MCA 2997
NP568|NG_569|III	gi|83775368|dbj|AP007174.1|	1.52e-19	228	Aspergillus oryzae RIB40
NP568|NG_569|III	gi|83775803|dbj|AP007175.1|	1.56e-19	228	Aspergillus oryzae RIB40
NP568|NG_569|III	gi|83768455|dbj|AP007157.1|	1.64e-19	228	Aspergillus oryzae RIB40
NP568|NG_569|III	gi|308818261|gb|AC242759.1|	1.68e-19	226	Postia placenta
NP568|NG_569|III	gi|630226106|ref|XM_007861766.1|	1.74e-19	221	Moniliophthora roreri MCA 2997
NP568|NG_569|III	gi|630224297|ref|XM_007861174.1|	1.76e-19	221	Moniliophthora roreri MCA 2997
NP568|NG_569|III	gi|630221099|ref|XM_007860118.1|	1.77e-19	222	Moniliophthora roreri MCA 2997
NP568|NG_569|III	gi|753718545|gb|CP009820.1|	1.86e-19	227	Botryotinia fuckeliana B05.10
NP568|NG_569|III	gi|753718538|gb|CP009813.1|	1.86e-19	227	Botryotinia fuckeliana B05.10
NP568|NG_569|III	gi|630198204|ref|XM_007852669.1|	1.93e-19	228	Moniliophthora roreri MCA 2997
NP568|NG_569|III	gi|630222937|ref|XM_007860730.1|	1.94e-19	223	Moniliophthora roreri MCA 2997
NP568|NG_569|III	gi|589269981|ref|XM_007000659.1|	1.98e-19	217	Tremella mesenterica DSM 1558
NP568|NG_569|III	gi|325974200|emb|FQ790293.1|	2.09e-19	227	Botryotinia fuckeliana T4
NP568|NG_569|III	gi|85662445|gb|AC165056.2|	2.15e-19	216	Phakopsora pachyrhizi
NP568|NG_569|III	gi|308818276|gb|AC242774.1|	2.46e-19	225	Postia placenta
NP568|NG_569|III	gi|630224451|ref|XM_007861225.1|	3.33e-19	224	Moniliophthora roreri MCA 2997
NP568|NG_569|III	gi|112181226|gb|AC188861.2|	3.69e-19	242	Phakopsora pachyrhizi
NP568|NG_569|III	gi|310616774|gb|AC242900.1|	3.74e-19	230	Postia placenta
NP568|NG_569|III	gi|630224394|ref|XM_007861206.1|	3.97e-19	228	Moniliophthora roreri MCA 2997
NP568|NG_569|III	gi|116812679|gb|AC188845.2|	3.97e-19	212	Phakopsora pachyrhizi
NP568|NG_569|III	gi|630208291|ref|XM_007855969.1|	4.12e-19	224	Moniliophthora roreri MCA 2997
NP568|NG_569|III	gi|630222145|ref|XM_007860471.1|	4.13e-19	226	Moniliophthora roreri MCA 2997
NP568|NG_569|III	gi|410026235|gb|JX569692.1|	5.16e-19	237	Hemileia vastatrix
NP568|NG_569|III	gi|630223626|ref|XM_007860956.1|	6.21e-19	226	Moniliophthora roreri MCA 2997
NP568|NG_569|III	gi|630217537|ref|XM_007858964.1|	6.21e-19	224	Moniliophthora roreri MCA 2997
NP568|NG_569|III	gi|599126454|gb|KJ526190.1|	6.82e-19	219	Moniliophthora perniciosa
NP568|NG_569|III	gi|930420440|ref|XM_014329018.1|	6.84e-19	220	Trichosporon asahii var. asahii CBS 2479
NP568|NG_569|III	gi|630222576|ref|XM_007860613.1|	7.21e-19	213	Moniliophthora roreri MCA 2997
NP568|NG_569|III	gi|409971476|gb|AC253724.1|	7.94e-19	226	Agaricus bisporus
NP568|NG_569|III	gi|409971575|gb|AC253823.1|	7.96e-19	226	Agaricus bisporus
NP568|NG_569|III	gi|55975215|gb|AC149313.2|	8.63e-19	242	Phakopsora pachyrhizi
NP568|NG_569|III	gi|629659220|ref|XM_007806193.1|	8.67e-19	202	Endocarpon pusillum Z07020
NP568|NG_569|III	gi|630225144|ref|XM_007861450.1|	8.76e-19	226	Moniliophthora roreri MCA 2997
NP568|NG_569|III	gi|60678297|gb|AC149343.2|	8.87e-19	212	Phakopsora pachyrhizi
NP568|NG_569|III	gi|630197858|ref|XM_007852558.1|	9.04e-19	207	Moniliophthora roreri MCA 2997
NP568|NG_569|III	gi|630212227|ref|XM_007857240.1|	9.16e-19	222	Moniliophthora roreri MCA 2997
NP568|NG_569|III	gi|308818282|gb|AC242780.1|	9.77e-19	230	Postia placenta
NP568|NG_569|III	gi|56410622|gb|AC149330.2|	1.03e-18	212	Phakopsora pachyrhizi
NP568|NG_569|III	gi|630222016|ref|XM_007860429.1|	1.14e-18	225	Moniliophthora roreri MCA 2997
NP568|NG_569|III	gi|153917326|dbj|AB291605.1|	1.3e-18	179	Lentinula edodes
NP568|NG_569|III	gi|630219594|ref|XM_007859627.1|	1.39e-18	215	Moniliophthora roreri MCA 2997
NP568|NG_569|III	gi|630212871|ref|XM_007857449.1|	1.54e-18	225	Moniliophthora roreri MCA 2997
NP568|NG_569|III	gi|119508472|gb|AC188860.2|	1.61e-18	242	Phakopsora pachyrhizi
NP568|NG_569|III	gi|146149424|gb|AC149399.2|	1.63e-18	227	Phakopsora pachyrhizi
NP568|NG_569|III	gi|599124435|ref|XM_007389324.1|	1.66e-18	230	Punctularia strigosozonata HHB-11173 SS5
NP568|NG_569|III	gi|599126461|gb|KJ526196.1|	1.7e-18	203	Moniliophthora perniciosa
NP568|NG_569|III	gi|630222227|ref|XM_007860498.1|	1.87e-18	222	Moniliophthora roreri MCA 2997
NP568|NG_569|III	gi|630223066|ref|XM_007860773.1|	2.05e-18	212	Moniliophthora roreri MCA 2997
NP568|NG_569|III	gi|5002508|dbj|AB028236.1|	2.09e-18	213	Tricholoma matsutake
NP568|NG_569|III	gi|630200024|ref|XM_007853262.1|	2.15e-18	226	Moniliophthora roreri MCA 2997
NP568|NG_569|III	gi|630224427|ref|XM_007861217.1|	2.18e-18	186	Moniliophthora roreri MCA 2997
NP568|NG_569|III	gi|409971564|gb|AC253812.1|	2.2e-18	226	Agaricus bisporus
NP568|NG_569|III	gi|83817072|gb|AC149319.2|	2.39e-18	242	Phakopsora pachyrhizi
NP568|NG_569|III	gi|630203479|ref|XM_007854395.1|	2.71e-18	222	Moniliophthora roreri MCA 2997
NP568|NG_569|III	gi|630223827|ref|XM_007861022.1|	2.77e-18	224	Moniliophthora roreri MCA 2997
NP568|NG_569|III	gi|255726279|ref|XM_002548020.1|	3.16e-18	231	Candida tropicalis MYA-3404
NP568|NG_569|III	gi|599126447|gb|KJ526183.1|	3.4e-18	207	Moniliophthora perniciosa
NP568|NG_569|III	gi|630224960|ref|XM_007861391.1|	3.5e-18	224	Moniliophthora roreri MCA 2997
NP568|NG_569|III	gi|325974267|emb|FQ790360.1|	3.6e-18	232	Botryotinia fuckeliana T4
NP568|NG_569|III	gi|630225319|ref|XM_007861508.1|	3.67e-18	227	Moniliophthora roreri MCA 2997
NP568|NG_569|III	gi|54606897|gb|AC149336.2|	3.9e-18	242	Phakopsora pachyrhizi
NP568|NG_569|III	gi|630968423|ref|XM_007882429.1|	4.02e-18	223	Pseudozyma flocculosa PF-1
NP568|NG_569|III	gi|630222633|ref|XM_007860632.1|	4.22e-18	232	Moniliophthora roreri MCA 2997
NP568|NG_569|III	gi|599126456|gb|KJ526192.1|	4.86e-18	213	Moniliophthora perniciosa
NP568|NG_569|III	gi|114053383|gb|AC188882.2|	5.01e-18	212	Phakopsora pachyrhizi
NP568|NG_569|III	gi|630218724|ref|XM_007859346.1|	5.03e-18	226	Moniliophthora roreri MCA 2997
NP568|NG_569|III	gi|630222290|ref|XM_007860519.1|	5.19e-18	186	Moniliophthora roreri MCA 2997
NP568|NG_569|III	gi|630223144|ref|XM_007860798.1|	5.56e-18	188	Moniliophthora roreri MCA 2997
NP568|NG_569|III	gi|630223932|ref|XM_007861056.1|	5.57e-18	226	Moniliophthora roreri MCA 2997
NP568|NG_569|III	gi|630219031|ref|XM_007859446.1|	5.63e-18	226	Moniliophthora roreri MCA 2997
NP568|NG_569|III	gi|630224791|ref|XM_007861336.1|	5.83e-18	225	Moniliophthora roreri MCA 2997
NP568|NG_569|III	gi|599126452|gb|KJ526188.1|	5.96e-18	218	Moniliophthora perniciosa
NP568|NG_569|III	gi|630222348|ref|XM_007860538.1|	6.32e-18	229	Moniliophthora roreri MCA 2997
NP568|NG_569|III	gi|630218477|ref|XM_007859265.1|	6.59e-18	225	Moniliophthora roreri MCA 2997
NP568|NG_569|III	gi|598059960|ref|XM_007359291.1|	8.07e-18	228	Auricularia delicata TFB-10046 SS5
NP568|NG_569|III	gi|630206290|ref|XM_007855311.1|	9.05e-18	225	Moniliophthora roreri MCA 2997
NP568|NG_569|III	gi|630221412|ref|XM_007860228.1|	9.14e-18	222	Moniliophthora roreri MCA 2997
NP568|NG_569|III	gi|56410621|gb|AC149328.2|	9.41e-18	212	Phakopsora pachyrhizi
NP568|NG_569|III	gi|114053382|gb|AC188878.2|	1.03e-17	242	Phakopsora pachyrhizi
NP568|NG_569|III	gi|58197694|gb|AC149342.2|	1.11e-17	183	Phakopsora pachyrhizi
NP568|NG_569|III	gi|599126453|gb|KJ526189.1|	1.28e-17	219	Moniliophthora perniciosa
NP568|NG_569|III	gi|57223396|gb|AE017342.1|	1.36e-17	217	Cryptococcus neoformans var. neoformans JEC21
NP568|NG_569|III	gi|630214346|ref|XM_007857927.1|	1.4e-17	223	Moniliophthora roreri MCA 2997
NP568|NG_569|III	gi|630220075|ref|XM_007859783.1|	1.52e-17	222	Moniliophthora roreri MCA 2997
NP568|NG_569|III	gi|58219672|gb|AC149344.2|	1.52e-17	241	Phakopsora pachyrhizi
NP568|NG_569|III	gi|630195360|ref|XM_007851751.1|	1.67e-17	222	Moniliophthora roreri MCA 2997
NP568|NG_569|III	gi|630201464|ref|XM_007853732.1|	1.73e-17	225	Moniliophthora roreri MCA 2997
NP568|NG_569|III	gi|114053384|gb|AC188885.2|	1.95e-17	241	Phakopsora pachyrhizi
NP568|NG_569|III	gi|66773522|gb|AC149408.2|	1.95e-17	241	Phakopsora pachyrhizi
NP568|NG_569|III	gi|58268441|ref|XM_571377.1|	1.96e-17	217	Cryptococcus neoformans var. neoformans JEC21
NP568|NG_569|III	gi|599118466|ref|XM_007386793.1|	2.16e-17	220	Punctularia strigosozonata HHB-11173 SS5
NP568|NG_569|III	gi|20152588|emb|AJ439555.1|	2.21e-17	246	Kazachstania exigua
NP568|NG_569|III	gi|134111347|ref|XM_770723.1|	2.21e-17	217	Cryptococcus neoformans var. neoformans B-3501A
NP568|NG_569|III	gi|630225022|ref|XM_007861411.1|	2.42e-17	207	Moniliophthora roreri MCA 2997
NP568|NG_569|III	gi|630211529|ref|XM_007857016.1|	2.44e-17	175	Moniliophthora roreri MCA 2997
NP568|NG_569|III	gi|630225533|ref|XM_007861578.1|	2.52e-17	225	Moniliophthora roreri MCA 2997
NP568|NG_569|III	gi|57229308|gb|AE017350.1|	2.61e-17	217	Cryptococcus neoformans var. neoformans JEC21
NP568|NG_569|III	gi|57227467|gb|AE017346.1|	2.63e-17	217	Cryptococcus neoformans var. neoformans JEC21
NP568|NG_569|III	gi|630224583|ref|XM_007861268.1|	2.73e-17	225	Moniliophthora roreri MCA 2997
NP568|NG_569|III	gi|14278998|dbj|AB062507.1|	2.81e-17	224	Magnaporthe grisea
NP568|NG_569|III	gi|630223974|ref|XM_007861070.1|	2.89e-17	222	Moniliophthora roreri MCA 2997
NP568|NG_569|III	gi|630225059|ref|XM_007861423.1|	3.29e-17	201	Moniliophthora roreri MCA 2997
NP568|NG_569|III	gi|630222594|ref|XM_007860619.1|	3.35e-17	183	Moniliophthora roreri MCA 2997
NP568|NG_569|III	gi|134112919|ref|XM_769910.1|	3.74e-17	217	Cryptococcus neoformans var. neoformans B-3501A
NP568|NG_569|III	gi|56542305|gb|AC149392.2|	3.86e-17	212	Phakopsora pachyrhizi
NP568|NG_569|III	gi|630198372|ref|XM_007852724.1|	4.42e-17	224	Moniliophthora roreri MCA 2997
NP568|NG_569|III	gi|66773518|gb|AC149338.2|	4.42e-17	245	Phakopsora pachyrhizi
NP568|NG_569|III	gi|630219783|ref|XM_007859688.1|	4.51e-17	226	Moniliophthora roreri MCA 2997
NP568|NG_569|III	gi|630219701|ref|XM_007859661.1|	4.55e-17	220	Moniliophthora roreri MCA 2997
NP568|NG_569|III	gi|308818295|gb|AC242793.1|	5.18e-17	121	Postia placenta
NP568|NG_569|III	gi|308818295|gb|AC242793.1|	5.18e-17	80	Postia placenta
NP568|NG_569|III	gi|78271979|gb|AC170157.2|	5.37e-17	241	Phakopsora pachyrhizi
NP568|NG_569|III	gi|50402536|gb|AY661428.1|	5.96e-17	217	Moniliophthora perniciosa
NP568|NG_569|III	gi|589269959|ref|XM_007000648.1|	6.36e-17	228	Tremella mesenterica DSM 1558
NP568|NG_569|III	gi|405118826|gb|CP003822.1|	6.43e-17	221	Cryptococcus neoformans var. grubii H99
NP568|NG_569|III	gi|405118222|gb|CP003821.1|	6.43e-17	221	Cryptococcus neoformans var. grubii H99
NP568|NG_569|III	gi|405117359|gb|CP003820.1|	6.43e-17	221	Cryptococcus neoformans var. grubii H99
NP568|NG_569|III	gi|405122062|gb|CP003828.1|	6.49e-17	221	Cryptococcus neoformans var. grubii H99
NP568|NG_569|III	gi|405122900|gb|CP003830.1|	7.04e-17	221	Cryptococcus neoformans var. grubii H99
NP568|NG_569|III	gi|171684234|ref|XM_001907024.1|	7.97e-17	219	Podospora anserina S mat+
NP568|NG_569|III	gi|189306711|gb|EU697464.1|	8.18e-17	219	Podospora anserina
NP568|NG_569|III	gi|630201976|ref|XM_007853900.1|	8.76e-17	213	Moniliophthora roreri MCA 2997
NP568|NG_569|III	gi|930414568|ref|XM_014326082.1|	8.85e-17	216	Trichosporon asahii var. asahii CBS 2479
NP568|NG_569|III	gi|170941881|emb|CU633899.1|	9.73e-17	219	Podospora anserina S mat+
NP568|NG_569|III	gi|681091882|emb|FO904936.1|	9.74e-17	219	Podospora anserina S mat+
NP568|NG_569|III	gi|630224019|ref|XM_007861085.1|	1.05e-16	224	Moniliophthora roreri MCA 2997
NP568|NG_569|III	gi|953382692|ref|XM_014680129.1|	1.09e-16	149	Penicillium digitatum Pd1
NP568|NG_569|III	gi|48056381|gb|AC149388.1|	1.1e-16	216	Phakopsora pachyrhizi
NP568|NG_569|III	gi|60360997|gb|AC149419.2|	1.16e-16	242	Phakopsora pachyrhizi
NP568|NG_569|III	gi|110556688|gb|AC188858.1|	1.25e-16	242	Phakopsora pachyrhizi
NP568|NG_569|III	gi|54606898|gb|AC149353.2|	1.27e-16	241	Phakopsora pachyrhizi
NP568|NG_569|III	gi|336257328|ref|XM_003343538.1|	1.33e-16	215	Sordaria macrospora k-hell
NP568|NG_569|III	gi|54654139|gb|AC149413.2|	1.34e-16	139	Phakopsora pachyrhizi
NP568|NG_569|III	gi|54654139|gb|AC149413.2|	1.34e-16	57	Phakopsora pachyrhizi
NP568|NG_569|III	gi|630223429|ref|XM_007860891.1|	1.37e-16	226	Moniliophthora roreri MCA 2997
NP568|NG_569|III	gi|748527287|ref|XM_011129202.1|	2.01e-16	202	Arthrobotrys oligospora ATCC 24927
NP568|NG_569|III	gi|347012982|gb|CP003007.1|	2.44e-16	215	Myceliophthora thermophila ATCC 42464
NP568|NG_569|III	gi|630223257|ref|XM_007860835.1|	3.17e-16	205	Moniliophthora roreri MCA 2997
NP568|NG_569|III	gi|630213242|ref|XM_007857569.1|	3.39e-16	216	Moniliophthora roreri MCA 2997
NP568|NG_569|III	gi|409971514|gb|AC253762.1|	4.32e-16	213	Agaricus bisporus
NP568|NG_569|III	gi|58219671|gb|AC149341.2|	4.52e-16	241	Phakopsora pachyrhizi
NP568|NG_569|III	gi|66730718|gb|AC149400.2|	4.61e-16	245	Phakopsora pachyrhizi
NP568|NG_569|III	gi|78271981|gb|AC170161.2|	4.77e-16	246	Phakopsora pachyrhizi
NP568|NG_569|III	gi|409971518|gb|AC253766.1|	4.95e-16	213	Agaricus bisporus
NP568|NG_569|III	gi|57230683|gb|AE017356.1|	5.03e-16	217	Cryptococcus neoformans var. neoformans JEC21
NP568|NG_569|III	gi|60650314|gb|AC149320.2|	5.3e-16	242	Phakopsora pachyrhizi
NP568|NG_569|III	gi|60360995|gb|AC149387.2|	5.99e-16	233	Phakopsora pachyrhizi
NP568|NG_569|III	gi|6650017|gb|AF051915.1|AF051915	6.93e-16	228	Passalora fulva
NP568|NG_569|III	gi|116191584|ref|XM_001221604.1|	7.42e-16	229	Chaetomium globosum CBS 148.51
NP568|NG_569|III	gi|57228452|gb|AE017348.1|	7.53e-16	240	Cryptococcus neoformans var. neoformans JEC21
NP568|NG_569|III	gi|444313430|ref|XM_004177325.1|	8.21e-16	216	Tetrapisispora blattae CBS 6284
NP568|NG_569|III	gi|347005580|gb|CP003002.1|	8.54e-16	222	Myceliophthora thermophila ATCC 42464
NP568|NG_569|III	gi|630200033|ref|XM_007853265.1|	8.67e-16	226	Moniliophthora roreri MCA 2997
NP568|NG_569|III	gi|598047698|ref|XM_007353160.1|	8.73e-16	218	Auricularia delicata TFB-10046 SS5
NP568|NG_569|III	gi|154283974|ref|XM_001542733.1|	1.04e-15	221	Ajellomyces capsulatus NAm1
NP568|NG_569|III	gi|154288743|ref|XM_001545069.1|	1.04e-15	185	Botryotinia fuckeliana B05.10
NP568|NG_569|III	gi|366987412|ref|XM_003673425.1|	1.1e-15	237	Naumovozyma castellii CBS 4309
NP568|NG_569|III	gi|403215779|emb|HE978318.1|	1.13e-15	244	Kazachstania naganishii CBS 8797
NP568|NG_569|III	gi|630222221|ref|XM_007860496.1|	1.17e-15	206	Moniliophthora roreri MCA 2997
NP568|NG_569|III	gi|57230420|gb|AE017353.1|	1.33e-15	240	Cryptococcus neoformans var. neoformans JEC21
NP568|NG_569|III	gi|57226924|gb|AE017345.1|	1.36e-15	240	Cryptococcus neoformans var. neoformans JEC21
NP568|NG_569|III	gi|114145814|gb|AC188854.2|	1.37e-15	189	Phakopsora pachyrhizi
NP568|NG_569|III	gi|4887631|dbj|AB027513.1|	1.37e-15	213	Tricholoma matsutake
NP568|NG_569|III	gi|629661808|ref|XM_007806824.1|	1.39e-15	207	Endocarpon pusillum Z07020
NP568|NG_569|III	gi|118445266|gb|AC188881.2|	1.4e-15	241	Phakopsora pachyrhizi
NP568|NG_569|III	gi|673530969|emb|HG529790.1|	1.46e-15	110	Melanopsichium pennsylvanicum 4
NP568|NG_569|III	gi|57226287|gb|AE017344.1|	1.51e-15	245	Cryptococcus neoformans var. neoformans JEC21
NP568|NG_569|III	gi|154278374|ref|XM_001539951.1|	1.52e-15	165	Ajellomyces capsulatus NAm1
NP568|NG_569|III	gi|57225559|gb|AE017343.1|	1.65e-15	240	Cryptococcus neoformans var. neoformans JEC21
NP568|NG_569|III	gi|342298823|emb|HE576752.1|	1.76e-15	237	Naumovozyma castellii CBS 4309
NP568|NG_569|III	gi|45504828|gb|AY510102.1|	1.77e-15	217	Melampsora lini
NP568|NG_569|III	gi|366996489|ref|XM_003677960.1|	1.81e-15	237	Naumovozyma castellii CBS 4309
NP568|NG_569|III	gi|599126451|gb|KJ526187.1|	1.91e-15	219	Moniliophthora perniciosa
NP568|NG_569|III	gi|336238098|ref|XM_003342362.1|	1.92e-15	180	Sordaria macrospora k-hell
NP568|NG_569|III	gi|568447660|ref|XM_006458288.1|	1.95e-15	224	Agaricus bisporus var. bisporus H97
NP568|NG_569|III	gi|116179095|ref|XM_001219396.1|	2.07e-15	225	Chaetomium globosum CBS 148.51
NP568|NG_569|III	gi|630224489|ref|XM_007861237.1|	2.19e-15	205	Moniliophthora roreri MCA 2997
NP568|NG_569|III	gi|630218901|ref|XM_007859404.1|	2.5e-15	222	Moniliophthora roreri MCA 2997
NP568|NG_569|III	gi|342303540|emb|HE576759.1|	2.51e-15	237	Naumovozyma castellii CBS 4309
NP568|NG_569|III	gi|748525485|ref|XM_011128611.1|	2.9e-15	223	Arthrobotrys oligospora ATCC 24927
NP568|NG_569|III	gi|58261121|ref|XM_567971.1|	3.32e-15	240	Cryptococcus neoformans var. neoformans JEC21
NP568|NG_569|III	gi|930414658|ref|XM_014326127.1|	3.5e-15	225	Trichosporon asahii var. asahii CBS 2479
NP568|NG_569|III	gi|66773521|gb|AC149398.2|	3.61e-15	228	Phakopsora pachyrhizi
NP568|NG_569|III	gi|409971552|gb|AC253800.1|	3.65e-15	224	Agaricus bisporus
NP568|NG_569|III	gi|409971486|gb|AC253734.1|	3.69e-15	224	Agaricus bisporus
NP568|NG_569|III	gi|83921723|gb|AC170152.2|	3.72e-15	210	Phakopsora pachyrhizi
NP568|NG_569|III	gi|347009717|gb|CP003004.1|	3.78e-15	213	Myceliophthora thermophila ATCC 42464
NP568|NG_569|III	gi|66793032|gb|AC149386.2|	3.81e-15	233	Phakopsora pachyrhizi
NP568|NG_569|III	gi|409971452|gb|AC253700.1|	3.88e-15	224	Agaricus bisporus
NP568|NG_569|III	gi|409971489|gb|AC253737.1|	3.89e-15	224	Agaricus bisporus
NP568|NG_569|III	gi|116195345|ref|XM_001223484.1|	4.2e-15	222	Chaetomium globosum CBS 148.51
NP568|NG_569|III	gi|636594730|ref|XM_008030513.1|	4.3e-15	216	Setosphaeria turcica Et28A
NP568|NG_569|III	gi|57230010|gb|AE017352.1|	4.36e-15	240	Cryptococcus neoformans var. neoformans JEC21
NP568|NG_569|III	gi|57222571|gb|AE017341.1|	4.6e-15	240	Cryptococcus neoformans var. neoformans JEC21
NP568|NG_569|III	gi|336241708|ref|XM_003342835.1|	5.15e-15	184	Sordaria macrospora k-hell
NP568|NG_569|III	gi|347011998|gb|CP003006.1|	5.21e-15	213	Myceliophthora thermophila ATCC 42464
NP568|NG_569|III	gi|347013775|gb|CP003008.1|	5.5e-15	213	Myceliophthora thermophila ATCC 42464
NP568|NG_569|III	gi|347008289|gb|CP003003.1|	5.75e-15	213	Myceliophthora thermophila ATCC 42464
NP568|NG_569|III	gi|405121536|gb|CP003827.1|	6e-15	208	Cryptococcus neoformans var. grubii H99
NP568|NG_569|III	gi|116194188|ref|XM_001222906.1|	6.25e-15	225	Chaetomium globosum CBS 148.51
NP568|NG_569|III	gi|367023866|ref|XM_003661170.1|	6.69e-15	213	Myceliophthora thermophila ATCC 42464
NP568|NG_569|III	gi|630221712|ref|XM_007860326.1|	7.36e-15	223	Moniliophthora roreri MCA 2997
NP568|NG_569|III	gi|387510370|emb|HE806316.1|	7.56e-15	216	Tetrapisispora blattae CBS 6284
NP568|NG_569|III	gi|56410624|gb|AC149352.2|	7.78e-15	246	Phakopsora pachyrhizi
NP568|NG_569|III	gi|405119423|gb|CP003823.1|	8.26e-15	214	Cryptococcus neoformans var. grubii H99
NP568|NG_569|III	gi|630220696|ref|XM_007859986.1|	8.62e-15	188	Moniliophthora roreri MCA 2997
NP568|NG_569|III	gi|915154212|ref|XM_013472928.1|	1.11e-14	232	Rasamsonia emersonii CBS 393.64
NP568|NG_569|III	gi|325974155|emb|FQ790247.1|	1.13e-14	223	Botryotinia fuckeliana T4
NP568|NG_569|III	gi|365987587|ref|XM_003670577.1|	1.16e-14	236	Naumovozyma dairenensis CBS 421
NP568|NG_569|III	gi|74356105|gb|AC156596.2|	1.18e-14	219	Laccaria bicolor
NP568|NG_569|III	gi|367012494|ref|XM_003680700.1|	1.18e-14	235	Torulaspora delbrueckii
NP568|NG_569|III	gi|112181224|gb|AC188852.2|	1.19e-14	159	Phakopsora pachyrhizi
NP568|NG_569|III	gi|112181224|gb|AC188852.2|	1.19e-14	69	Phakopsora pachyrhizi
NP568|NG_569|III	gi|154283950|ref|XM_001542721.1|	1.22e-14	92	Ajellomyces capsulatus NAm1
NP568|NG_569|III	gi|154270866|ref|XM_001536237.1|	1.22e-14	92	Ajellomyces capsulatus NAm1
NP568|NG_569|III	gi|154281212|ref|XM_001541369.1|	1.24e-14	92	Ajellomyces capsulatus NAm1
NP568|NG_569|III	gi|630966627|ref|XM_007881531.1|	1.27e-14	225	Pseudozyma flocculosa PF-1
NP568|NG_569|III	gi|60735117|gb|AC149376.2|	1.28e-14	242	Phakopsora pachyrhizi
NP568|NG_569|III	gi|347010928|gb|CP003005.1|	1.38e-14	213	Myceliophthora thermophila ATCC 42464
NP568|NG_569|III	gi|915153608|ref|XM_013472806.1|	1.45e-14	232	Rasamsonia emersonii CBS 393.64
NP568|NG_569|III	gi|409971529|gb|AC253777.1|	1.5e-14	224	Agaricus bisporus
NP568|NG_569|III	gi|409971510|gb|AC253758.1|	1.5e-14	224	Agaricus bisporus
NP568|NG_569|III	gi|359747768|emb|HE616744.1|	1.55e-14	235	Torulaspora delbrueckii
NP568|NG_569|III	gi|343769342|emb|HE580272.1|	1.63e-14	236	Naumovozyma dairenensis CBS 421
NP568|NG_569|III	gi|134119051|ref|XM_766714.1|	1.64e-14	207	Cryptococcus neoformans var. neoformans B-3501A
NP568|NG_569|III	gi|116208567|ref|XM_001230092.1|	1.64e-14	225	Chaetomium globosum CBS 148.51
NP568|NG_569|III	gi|405120503|gb|CP003825.1|	1.74e-14	208	Cryptococcus neoformans var. grubii H99
NP568|NG_569|III	gi|56044574|gb|AC149331.2|	1.76e-14	242	Phakopsora pachyrhizi
NP568|NG_569|III	gi|365991278|ref|XM_003672420.1|	1.99e-14	219	Naumovozyma dairenensis CBS 421
NP568|NG_569|III	gi|405123726|gb|CP003832.1|	2.13e-14	237	Cryptococcus neoformans var. grubii H99
NP568|NG_569|III	gi|405119828|gb|CP003824.1|	2.35e-14	242	Cryptococcus neoformans var. grubii H99
NP568|NG_569|III	gi|630962739|ref|XM_007879587.1|	2.4e-14	225	Pseudozyma flocculosa PF-1
NP568|NG_569|III	gi|405121034|gb|CP003826.1|	2.56e-14	214	Cryptococcus neoformans var. grubii H99
NP568|NG_569|III	gi|444318090|ref|XM_004179655.1|	2.64e-14	212	Tetrapisispora blattae CBS 6284
NP568|NG_569|III	gi|343771218|emb|HE580277.1|	2.68e-14	219	Naumovozyma dairenensis CBS 421
NP568|NG_569|III	gi|405122517|gb|CP003829.1|	2.77e-14	128	Cryptococcus neoformans var. grubii H99
NP568|NG_569|III	gi|599126450|gb|KJ526186.1|	2.93e-14	133	Moniliophthora perniciosa
NP568|NG_569|III	gi|116179213|ref|XM_001219455.1|	3e-14	237	Chaetomium globosum CBS 148.51
NP568|NG_569|III	gi|365984456|ref|XM_003669013.1|	3.22e-14	219	Naumovozyma dairenensis CBS 421
NP568|NG_569|III	gi|598045018|ref|XM_007351820.1|	3.25e-14	219	Auricularia delicata TFB-10046 SS5
NP568|NG_569|III	gi|253994018|gb|GQ141676.1|	3.28e-14	212	Polyporus grammocephalus
NP568|NG_569|III	gi|116875916|gb|AC188887.2|	3.32e-14	211	Phakopsora pachyrhizi
NP568|NG_569|III	gi|365984846|ref|XM_003669208.1|	3.35e-14	219	Naumovozyma dairenensis CBS 421
NP568|NG_569|III	gi|820658696|emb|LN483238.1|	3.76e-14	164	Xanthophyllomyces dendrorhous
NP568|NG_569|III	gi|630218916|ref|XM_007859409.1|	3.78e-14	185	Moniliophthora roreri MCA 2997
NP568|NG_569|III	gi|56044573|gb|AC149326.2|	4.06e-14	244	Phakopsora pachyrhizi
NP568|NG_569|III	gi|343767680|emb|HE580269.1|	4.31e-14	219	Naumovozyma dairenensis CBS 421
NP568|NG_569|III	gi|57228846|gb|AE017349.1|	4.67e-14	211	Cryptococcus neoformans var. neoformans JEC21
NP568|NG_569|III	gi|387512392|emb|HE806318.1|	4.67e-14	212	Tetrapisispora blattae CBS 6284
NP568|NG_569|III	gi|260940778|ref|XM_002615183.1|	4.71e-14	216	Clavispora lusitaniae ATCC 42720
NP568|NG_569|III	gi|410730498|ref|XM_003980021.1|	5.05e-14	238	Naumovozyma dairenensis CBS 421
NP568|NG_569|III	gi|444316735|ref|XM_004178977.1|	5.62e-14	212	Tetrapisispora blattae CBS 6284
NP568|NG_569|III	gi|401779847|emb|HE580273.2|	6.47e-14	238	Naumovozyma dairenensis CBS 421
NP568|NG_569|III	gi|444320947|ref|XM_004181082.1|	6.6e-14	210	Tetrapisispora blattae CBS 6284
NP568|NG_569|III	gi|54606896|gb|AC149316.2|	6.72e-14	240	Phakopsora pachyrhizi
NP568|NG_569|III	gi|170112042|ref|XM_001887189.1|	7e-14	232	Laccaria bicolor S238N-H82
NP568|NG_569|III	gi|568451568|ref|XM_006459583.1|	7.72e-14	202	Agaricus bisporus var. bisporus H97
NP568|NG_569|III	gi|937912581|dbj|AP014960.1|	3.91e-30	232	Oryza sativa Japonica Group
NP568|NG_569|III	gi|300681517|emb|FN564434.1|	6.26e-30	231	Triticum aestivum
NP568|NG_569|III	gi|669026884|emb|HG670306.1|	6.26e-30	231	Triticum aestivum
NP568|NG_569|III	gi|49387930|dbj|AP004039.3|	3.89e-29	231	Oryza sativa Japonica Group
NP568|NG_569|III	gi|937901440|dbj|AP014958.1|	3.94e-29	231	Oryza sativa Japonica Group
NP568|NG_569|III	gi|731390146|ref|XM_010651949.1|	1.95e-28	235	Vitis vinifera
NP568|NG_569|III	gi|591390447|gb|JX295577.2|	2.54e-28	235	Aegilops tauschii
NP568|NG_569|III	gi|147789775|emb|AM443491.2|	6.38e-28	230	Vitis vinifera
NP568|NG_569|III	gi|965656162|dbj|AP015034.1|	7.87e-28	226	Vigna angularis var. angularis
NP568|NG_569|III	gi|965604228|dbj|AP015040.1|	1e-27	228	Vigna angularis var. angularis
NP568|NG_569|III	gi|45752576|dbj|AP003613.3|	1.06e-27	232	Oryza sativa Japonica Group
NP568|NG_569|III	gi|937920774|dbj|AP014962.1|	1.07e-27	232	Oryza sativa Japonica Group
NP568|NG_569|III	gi|502166306|ref|XM_004513796.1|	1.38e-27	230	Cicer arietinum
NP568|NG_569|III	gi|284434697|gb|GQ252884.1|	1.47e-27	220	Phyllostachys edulis
NP568|NG_569|III	gi|965599522|dbj|AP015038.1|	1.73e-27	228	Vigna angularis var. angularis
NP568|NG_569|III	gi|733580123|emb|LN685787.1|	1.83e-27	227	Cucumis melo
NP568|NG_569|III	gi|139096470|gb|AC184161.3|	1.86e-27	228	Medicago truncatula
NP568|NG_569|III	gi|513788311|gb|AC254599.1|	1.88e-27	230	Capsella rubella
NP568|NG_569|III	gi|270381237|emb|CU475569.2|	1.95e-27	229	Medicago truncatula
NP568|NG_569|III	gi|223019661|emb|CU928860.2|	1.96e-27	229	Medicago truncatula
NP568|NG_569|III	gi|123680108|emb|AM450035.1|	2.39e-27	235	Vitis vinifera
NP568|NG_569|III	gi|7362787|emb|AL138638.2|	3.44e-27	233	Arabidopsis thaliana
NP568|NG_569|III	gi|159883711|emb|CU463045.2|	3.47e-27	230	Medicago truncatula
NP568|NG_569|III	gi|332640072|gb|CP002686.1|	3.51e-27	233	Arabidopsis thaliana
NP568|NG_569|III	gi|733577520|emb|LN685034.1|	3.57e-27	227	Cucumis melo
NP568|NG_569|III	gi|154240786|gb|AC199759.3|	3.77e-27	228	Medicago truncatula
NP568|NG_569|III	gi|932283019|gb|CP012614.1|	4.24e-27	232	Oryza sativa Indica Group
NP568|NG_569|III	gi|733582665|emb|LN686109.1|	4.46e-27	234	Cucumis melo
NP568|NG_569|III	gi|147828061|emb|AM478176.2|	4.54e-27	230	Vitis vinifera
NP568|NG_569|III	gi|34559165|gb|AY371488.1|	4.7e-27	231	Zea mays
NP568|NG_569|III	gi|733577627|emb|LN685141.1|	5.75e-27	227	Cucumis melo
NP568|NG_569|III	gi|82524947|gb|AC146719.32|	6.44e-27	230	Medicago truncatula
NP568|NG_569|III	gi|727577470|ref|XM_010463103.1|	6.48e-27	224	Camelina sativa
NP568|NG_569|III	gi|965620176|dbj|AP015053.1|	7.54e-27	226	Vigna angularis var. angularis
NP568|NG_569|III	gi|145966963|gb|AC156260.20|	7.88e-27	228	Medicago truncatula
NP568|NG_569|III	gi|186452674|gb|AC152178.33|	7.91e-27	228	Medicago truncatula
NP568|NG_569|III	gi|89274260|gb|AC146589.31|	7.92e-27	230	Medicago truncatula
NP568|NG_569|III	gi|965607001|dbj|AP015041.1|	8.1e-27	230	Vigna angularis var. angularis
NP568|NG_569|III	gi|48717568|gb|AC146758.11|	8.36e-27	230	Medicago truncatula
NP568|NG_569|III	gi|965601945|dbj|AP015039.1|	8.49e-27	226	Vigna angularis var. angularis
NP568|NG_569|III	gi|170763721|gb|AC123573.54|	8.69e-27	230	Medicago truncatula
NP568|NG_569|III	gi|102140273|gb|AC122165.40|	8.97e-27	230	Medicago truncatula
NP568|NG_569|III	gi|965620509|dbj|AP015096.1|	9.04e-27	230	Vigna angularis var. angularis
NP568|NG_569|III	gi|93352684|gb|AC149473.33|	9.21e-27	228	Medicago truncatula
NP568|NG_569|III	gi|58000547|gb|AC152158.10|	9.22e-27	228	Medicago truncatula
NP568|NG_569|III	gi|126635099|emb|CT963109.2|	9.36e-27	228	Medicago truncatula
NP568|NG_569|III	gi|51699563|gb|AC121235.20|	1.11e-26	230	Medicago truncatula
NP568|NG_569|III	gi|59676734|gb|AC148346.12|	1.11e-26	230	Medicago truncatula
NP568|NG_569|III	gi|965613050|dbj|AP015043.1|	1.18e-26	220	Vigna angularis var. angularis
NP568|NG_569|III	gi|309706726|emb|FP700164.5|	1.2e-26	228	Medicago truncatula
NP568|NG_569|III	gi|965664935|dbj|AP015036.1|	1.21e-26	227	Vigna angularis var. angularis
NP568|NG_569|III	gi|88595402|gb|AC151726.31|	1.24e-26	228	Medicago truncatula
NP568|NG_569|III	gi|148922990|gb|AC169516.4|	1.25e-26	228	Medicago truncatula
NP568|NG_569|III	gi|656991036|gb|KJ732098.1|	1.29e-26	227	Zea mays
NP568|NG_569|III	gi|121944969|emb|CU024897.6|	1.35e-26	228	Medicago truncatula
NP568|NG_569|III	gi|965615722|dbj|AP015044.1|	1.45e-26	230	Vigna angularis var. angularis
NP568|NG_569|III	gi|59933344|gb|AC155883.2|	1.45e-26	228	Medicago truncatula
NP568|NG_569|III	gi|119359657|emb|CU137656.2|	1.52e-26	230	Medicago truncatula
NP568|NG_569|III	gi|50252962|dbj|AP005758.3|	1.54e-26	232	Oryza sativa Japonica Group
NP568|NG_569|III	gi|50252625|dbj|AP005585.3|	1.55e-26	232	Oryza sativa Japonica Group
NP568|NG_569|III	gi|160948470|emb|CU468255.5|	1.55e-26	228	Medicago truncatula
NP568|NG_569|III	gi|937931852|dbj|AP014965.1|	1.56e-26	232	Oryza sativa Japonica Group
NP568|NG_569|III	gi|148589153|emb|CR954191.3|	1.58e-26	228	Medicago truncatula
NP568|NG_569|III	gi|159883663|emb|CU469564.1|	1.59e-26	228	Medicago truncatula
NP568|NG_569|III	gi|160688516|gb|AC202572.7|	1.59e-26	228	Medicago truncatula
NP568|NG_569|III	gi|343780987|gb|AC148652.2|	1.59e-26	228	Medicago truncatula
NP568|NG_569|III	gi|205361047|gb|AC146972.54|	1.65e-26	230	Medicago truncatula
NP568|NG_569|III	gi|89941500|gb|AC145202.24|	1.75e-26	230	Medicago truncatula
NP568|NG_569|III	gi|344030279|gb|AC163383.4|	1.77e-26	228	Medicago truncatula
NP568|NG_569|III	gi|123237580|emb|CU184734.6|	1.94e-26	229	Medicago truncatula
NP568|NG_569|III	gi|733593417|emb|LN689123.1|	2e-26	220	Cucumis melo
NP568|NG_569|III	gi|645267553|ref|XM_008240904.1|	2.06e-26	232	Prunus mume
NP568|NG_569|III	gi|965617919|dbj|AP015046.1|	2.12e-26	228	Vigna angularis var. angularis
NP568|NG_569|III	gi|156255280|gb|AC151673.27|	2.2e-26	230	Medicago truncatula
NP568|NG_569|III	gi|733578511|emb|LN685362.1|	2.24e-26	228	Cucumis melo
NP568|NG_569|III	gi|47605013|gb|AC140850.20|	2.36e-26	228	Medicago truncatula
NP568|NG_569|III	gi|965620379|dbj|AP015079.1|	2.54e-26	226	Vigna angularis var. angularis
NP568|NG_569|III	gi|932282751|gb|CP012611.1|	2.55e-26	214	Oryza sativa Indica Group
NP568|NG_569|III	gi|733574945|emb|LN684847.1|	2.72e-26	231	Cucumis melo
NP568|NG_569|III	gi|156231139|gb|AC140067.15|	2.73e-26	230	Medicago truncatula
NP568|NG_569|III	gi|156231137|gb|AC141865.28|	2.73e-26	230	Medicago truncatula
NP568|NG_569|III	gi|94174077|gb|AC145512.33|	2.74e-26	230	Medicago truncatula
NP568|NG_569|III	gi|86475707|emb|CT010572.8|	3e-26	228	Medicago truncatula
NP568|NG_569|III	gi|965620969|dbj|AP015165.1|	3.03e-26	228	Vigna angularis var. angularis
NP568|NG_569|III	gi|733575281|emb|LN684520.1|	3.26e-26	234	Cucumis melo
NP568|NG_569|III	gi|242085387|ref|XM_002443074.1|	3.3e-26	220	Sorghum bicolor
NP568|NG_569|III	gi|292494958|gb|AC156261.32|	3.32e-26	228	Medicago truncatula
NP568|NG_569|III	gi|292494965|gb|AC233847.5|	3.33e-26	228	Medicago truncatula
NP568|NG_569|III	gi|237513054|gb|AC233573.6|	3.33e-26	228	Medicago truncatula
NP568|NG_569|III	gi|965661712|dbj|AP015035.1|	3.44e-26	227	Vigna angularis var. angularis
NP568|NG_569|III	gi|733591484|emb|LN681808.1|	3.5e-26	234	Cucumis melo
NP568|NG_569|III	gi|733577134|emb|LN713256.1|	3.5e-26	234	Cucumis melo
NP568|NG_569|III	gi|224923077|gb|AC235313.1|	3.63e-26	226	Glycine max
NP568|NG_569|III	gi|733579591|emb|LN685408.1|	3.84e-26	227	Cucumis melo
NP568|NG_569|III	gi|262091641|gb|GU059905.1|	3.87e-26	234	Picea glauca
NP568|NG_569|III	gi|965610582|dbj|AP015042.1|	3.92e-26	228	Vigna angularis var. angularis
NP568|NG_569|III	gi|965672503|dbj|AP015279.1|	3.93e-26	231	Vigna angularis var. angularis
NP568|NG_569|III	gi|733579404|emb|LN685720.1|	4.05e-26	227	Cucumis melo
NP568|NG_569|III	gi|733575056|emb|LN684386.1|	4.07e-26	227	Cucumis melo
NP568|NG_569|III	gi|965621056|dbj|AP015184.1|	4.12e-26	231	Vigna angularis var. angularis
NP568|NG_569|III	gi|224923123|gb|AC235359.1|	4.26e-26	226	Glycine max
NP568|NG_569|III	gi|965674925|dbj|AP015831.1|	4.31e-26	231	Vigna angularis var. angularis
NP568|NG_569|III	gi|733576401|emb|LN684614.1|	4.33e-26	227	Cucumis melo
NP568|NG_569|III	gi|733576431|emb|LN684644.1|	4.53e-26	227	Cucumis melo
NP568|NG_569|III	gi|965668308|dbj|AP015037.1|	4.6e-26	230	Vigna angularis var. angularis
NP568|NG_569|III	gi|224923198|gb|AC235434.1|	4.8e-26	219	Glycine max
NP568|NG_569|III	gi|733601186|emb|LN681892.1|	4.91e-26	227	Cucumis melo
NP568|NG_569|III	gi|733578316|emb|LN713263.1|	4.91e-26	227	Cucumis melo
NP568|NG_569|III	gi|502524961|emb|HF937094.1|	4.99e-26	234	Picea abies
NP568|NG_569|III	gi|965672779|dbj|AP015346.1|	5.03e-26	231	Vigna angularis var. angularis
NP568|NG_569|III	gi|313150351|dbj|AB505452.1|	5.06e-26	229	Glandirana rugosa
NP568|NG_569|III	gi|733601530|emb|LN681915.1|	5.09e-26	228	Cucumis melo
NP568|NG_569|III	gi|733578670|emb|LN713265.1|	5.1e-26	228	Cucumis melo
NP568|NG_569|III	gi|663673443|emb|HG975444.1|	5.15e-26	219	Solanum pennellii
NP568|NG_569|III	gi|733572611|emb|LN684066.1|	5.21e-26	217	Cucumis melo
NP568|NG_569|III	gi|733584780|emb|LN687148.1|	5.23e-26	219	Cucumis melo
NP568|NG_569|III	gi|92893973|gb|AC144805.9|	5.59e-26	228	Medicago truncatula
NP568|NG_569|III	gi|95102142|gb|AC147497.25|	5.76e-26	230	Medicago truncatula
NP568|NG_569|III	gi|57900874|gb|AC148756.2|	5.84e-26	228	Medicago truncatula
NP568|NG_569|III	gi|965620552|dbj|AP015102.1|	6.02e-26	226	Vigna angularis var. angularis
NP568|NG_569|III	gi|88759705|gb|AC151916.19|	6.04e-26	228	Medicago truncatula
NP568|NG_569|III	gi|92108723|emb|CT863711.2|	6.23e-26	230	Medicago truncatula
NP568|NG_569|III	gi|932283291|gb|CP012617.1|	6.33e-26	228	Oryza sativa Indica Group
NP568|NG_569|III	gi|965620575|dbj|AP015105.1|	6.36e-26	226	Vigna angularis var. angularis
NP568|NG_569|III	gi|147810025|emb|AM434561.2|	6.4e-26	230	Vitis vinifera
NP568|NG_569|III	gi|123665204|emb|AM475847.1|	6.58e-26	230	Vitis vinifera
NP568|NG_569|III	gi|147860583|emb|AM483451.2|	6.75e-26	229	Vitis vinifera
NP568|NG_569|III	gi|733601799|emb|LN681931.1|	7.63e-26	234	Cucumis melo
NP568|NG_569|III	gi|733578671|emb|LN713266.1|	7.63e-26	234	Cucumis melo
NP568|NG_569|III	gi|409905626|gb|JX485630.1|	7.63e-26	225	Lactuca sativa
NP568|NG_569|III	gi|965675791|dbj|AP015981.1|	7.63e-26	228	Vigna angularis var. angularis
NP568|NG_569|III	gi|965620453|dbj|AP015087.1|	7.84e-26	230	Vigna angularis var. angularis
NP568|NG_569|III	gi|123683896|emb|AM479636.1|	7.86e-26	228	Vitis vinifera
NP568|NG_569|III	gi|63094101|gb|AC149492.14|	8.35e-26	228	Medicago truncatula
NP568|NG_569|III	gi|238836899|gb|GQ184457.1|	8.5e-26	231	Zea mays
NP568|NG_569|III	gi|53850689|gb|AC149208.4|	8.74e-26	228	Medicago truncatula
NP568|NG_569|III	gi|224923022|gb|AC235258.1|	8.94e-26	230	Glycine max
NP568|NG_569|III	gi|224923167|gb|AC235403.1|	8.94e-26	230	Glycine max
NP568|NG_569|III	gi|965621090|dbj|AP015190.1|	9.13e-26	227	Vigna angularis var. angularis
NP568|NG_569|III	gi|189908054|gb|AC147498.15|	9.18e-26	230	Medicago truncatula
NP568|NG_569|III	gi|965674319|dbj|AP015653.1|	9.36e-26	230	Vigna angularis var. angularis
NP568|NG_569|III	gi|335999270|gb|JF701618.1|	9.96e-26	239	Triticum aestivum
NP568|NG_569|III	gi|733571478|emb|LN683274.1|	1e-25	227	Cucumis melo
NP568|NG_569|III	gi|119507212|emb|CT967305.12|	1e-25	230	Medicago truncatula
NP568|NG_569|III	gi|46063515|gb|AC108223.5|	1.01e-25	225	Oryza sativa Japonica Group
NP568|NG_569|III	gi|937937345|dbj|AP014967.1|	1.02e-25	225	Oryza sativa Japonica Group
NP568|NG_569|III	gi|57900868|gb|AC138199.22|	1.03e-25	228	Medicago truncatula
NP568|NG_569|III	gi|733575021|emb|LN684923.1|	1.06e-25	227	Cucumis melo
NP568|NG_569|III	gi|147795668|emb|AM453682.2|	1.08e-25	230	Vitis vinifera
NP568|NG_569|III	gi|164565336|emb|CU571306.4|	1.09e-25	230	Medicago truncatula
NP568|NG_569|III	gi|128588731|gb|AC195450.5|	1.11e-25	230	Glycine tomentella
NP568|NG_569|III	gi|733582646|emb|LN686090.1|	1.19e-25	227	Cucumis melo
NP568|NG_569|III	gi|46518319|dbj|AP003635.2|	1.2e-25	214	Oryza sativa Japonica Group
NP568|NG_569|III	gi|52076979|dbj|AP005192.3|	1.2e-25	214	Oryza sativa Japonica Group
NP568|NG_569|III	gi|154800566|gb|AC207706.2|	1.21e-25	226	Glycine tomentella
NP568|NG_569|III	gi|154800567|gb|AC187163.14|	1.21e-25	226	Glycine tomentella
NP568|NG_569|III	gi|343791042|gb|AC161398.8|	1.21e-25	226	Medicago truncatula
NP568|NG_569|III	gi|965678471|dbj|AP016583.1|	1.22e-25	226	Vigna angularis var. angularis
NP568|NG_569|III	gi|147845253|emb|AM463480.2|	1.27e-25	230	Vitis vinifera
[truncated: 10,070 more rows]

## Sheet: AS
query	subject	E_value	Align_len	subject_organism
P56|Iso_109,Iso_110|I|SPAC24B11.06c	gi|891559959|ref|XP_013018374.1|	1.28e-96	144	Schizosaccharomyces octosporus yFS286
P56|Iso_109,Iso_110|I|SPAC24B11.06c	gi|891585225|ref|XP_013022563.1|	2.72e-94	143	Schizosaccharomyces cryophilus OY26
P56|Iso_109,Iso_110|I|SPAC24B11.06c	gi|213406053|ref|XP_002173798.1|	4.99e-94	144	Schizosaccharomyces japonicus yFS275
P56|Iso_109,Iso_110|I|SPAC24B11.06c	gi|213406671|ref|XP_002174107.1|	3.1e-35	138	Schizosaccharomyces japonicus yFS275
P56|Iso_109,Iso_110|I|SPAC24B11.06c	gi|891572325|ref|XP_013020097.1|	1.35e-32	136	Schizosaccharomyces octosporus yFS286
P56|Iso_109,Iso_110|I|SPAC24B11.06c	gi|891578879|ref|XP_013021558.1|	1.42e-32	136	Schizosaccharomyces cryophilus OY26
P56|Iso_109,Iso_110|I|SPAC24B11.06c	gi|213409748|ref|XP_002175644.1|	8.09e-31	136	Schizosaccharomyces japonicus yFS275
P56|Iso_109,Iso_110|I|SPAC24B11.06c	gi|891554180|ref|XP_013017628.1|	6.5e-29	137	Schizosaccharomyces octosporus yFS286
P56|Iso_109,Iso_110|I|SPAC24B11.06c	gi|891600158|ref|XP_013025485.1|	7.58e-29	137	Schizosaccharomyces cryophilus OY26
P56|Iso_109,Iso_110|I|SPAC24B11.06c	gi|213406890|ref|XP_002174216.1|	2.58e-14	98	Schizosaccharomyces japonicus yFS275
P56|Iso_109,Iso_110|I|SPAC24B11.06c	gi|891593836|ref|XP_013024348.1|	4.74e-13	101	Schizosaccharomyces cryophilus OY26
P56|Iso_109,Iso_110|I|SPAC24B11.06c	gi|213402427|ref|XP_002171986.1|	4.84e-13	102	Schizosaccharomyces japonicus yFS275
P56|Iso_109,Iso_110|I|SPAC24B11.06c	gi|891542723|ref|XP_013016055.1|	6.02e-13	104	Schizosaccharomyces octosporus yFS286
P56|Iso_109,Iso_110|I|SPAC24B11.06c	gi|891550820|ref|XP_013017005.1|	4.24e-12	106	Schizosaccharomyces octosporus yFS286
P56|Iso_109,Iso_110|I|SPAC24B11.06c	gi|891602805|ref|XP_013025967.1|	1.86e-11	99	Schizosaccharomyces cryophilus OY26
P56|Iso_109,Iso_110|I|SPAC24B11.06c	gi|891556919|ref|XP_013017915.1|	1.9e-11	99	Schizosaccharomyces octosporus yFS286
P56|Iso_109,Iso_110|I|SPAC24B11.06c	gi|891602673|ref|XP_013025901.1|	2.79e-11	102	Schizosaccharomyces cryophilus OY26
P56|Iso_109,Iso_110|I|SPAC24B11.06c	gi|891592483|ref|XP_013024061.1|	3.29e-11	95	Schizosaccharomyces cryophilus OY26
P56|Iso_109,Iso_110|I|SPAC24B11.06c	gi|891551431|ref|XP_013017310.1|	3.04e-10	102	Schizosaccharomyces octosporus yFS286
P56|Iso_109,Iso_110|I|SPAC24B11.06c	gi|213407770|ref|XP_002174656.1|	5.31e-10	92	Schizosaccharomyces japonicus yFS275
P56|Iso_109,Iso_110|I|SPAC24B11.06c	gi|891579280|ref|XP_013021676.1|	2.95e-09	130	Schizosaccharomyces cryophilus OY26
P56|Iso_109,Iso_110|I|SPAC24B11.06c	gi|891551163|ref|XP_013017176.1|	3.25e-09	116	Schizosaccharomyces octosporus yFS286
P56|Iso_109,Iso_110|I|SPAC24B11.06c	gi|891585706|ref|XP_013022803.1|	5.76e-09	107	Schizosaccharomyces cryophilus OY26
P56|Iso_109,Iso_110|I|SPAC24B11.06c	gi|891542617|ref|XP_013016002.1|	8.11e-09	130	Schizosaccharomyces octosporus yFS286
P56|Iso_109,Iso_110|I|SPAC24B11.06c	gi|745752592|ref|XP_002175091.2|	1.34e-08	98	Schizosaccharomyces japonicus yFS275
P56|Iso_109,Iso_110|I|SPAC24B11.06c	gi|745750731|ref|XP_002171629.2|	4.71e-08	115	Schizosaccharomyces japonicus yFS275
P56|Iso_109,Iso_110|I|SPAC24B11.06c	gi|213405653|ref|XP_002173598.1|	7.32e-08	131	Schizosaccharomyces japonicus yFS275
P56|Iso_109,Iso_110|I|SPAC24B11.06c	gi|213406914|ref|XP_002174228.1|	5.07e-07	116	Schizosaccharomyces japonicus yFS275
P56|Iso_109,Iso_110|I|SPAC24B11.06c	gi|891587307|ref|XP_013023141.1|	2.09e-06	93	Schizosaccharomyces cryophilus OY26
P56|Iso_109,Iso_110|I|SPAC24B11.06c	gi|213404582|ref|XP_002173063.1|	2.82e-06	102	Schizosaccharomyces japonicus yFS275
P56|Iso_109,Iso_110|I|SPAC24B11.06c	gi|891577354|ref|XP_013020655.1|	3.46e-06	93	Schizosaccharomyces octosporus yFS286
P56|Iso_109,Iso_110|I|SPAC24B11.06c	gi|891595593|ref|XP_013024543.1|	3.53e-06	144	Schizosaccharomyces cryophilus OY26
P56|Iso_109,Iso_110|I|SPAC24B11.06c	gi|891594643|ref|XP_013024387.1|	2.45e-05	101	Schizosaccharomyces cryophilus OY26
P56|Iso_109,Iso_110|I|SPAC24B11.06c	gi|891557116|ref|XP_013018013.1|	3.17e-05	101	Schizosaccharomyces octosporus yFS286
P56|Iso_109,Iso_110|I|SPAC24B11.06c	gi|213407594|ref|XP_002174568.1|	4.4e-05	103	Schizosaccharomyces japonicus yFS275
P56|Iso_109,Iso_110|I|SPAC24B11.06c	gi|891545346|ref|XP_013016322.1|	6.5e-05	127	Schizosaccharomyces octosporus yFS286
P56|Iso_109,Iso_110|I|SPAC24B11.06c	gi|891542450|ref|XP_013015919.1|	8.93e-05	123	Schizosaccharomyces octosporus yFS286
P56|Iso_109,Iso_110|I|SPAC24B11.06c	gi|891556944|ref|XP_013017927.1|	0.00011	102	Schizosaccharomyces octosporus yFS286
P56|Iso_109,Iso_110|I|SPAC24B11.06c	gi|213404532|ref|XP_002173038.1|	0.000188	93	Schizosaccharomyces japonicus yFS275
P56|Iso_109,Iso_110|I|SPAC24B11.06c	gi|213402979|ref|XP_002172262.1|	0.000324	57	Schizosaccharomyces japonicus yFS275
P56|Iso_109,Iso_110|I|SPAC24B11.06c	gi|891582620|ref|XP_013022291.1|	0.000462	34	Schizosaccharomyces cryophilus OY26
P56|Iso_109,Iso_110|I|SPAC24B11.06c	gi|891557154|ref|XP_013018032.1|	0.000587	52	Schizosaccharomyces octosporus yFS286
P56|Iso_109,Iso_110|I|SPAC24B11.06c	gi|891579442|ref|XP_013021756.1|	0.001	123	Schizosaccharomyces cryophilus OY26
P56|Iso_109,Iso_110|I|SPAC24B11.06c	gi|891602781|ref|XP_013025955.1|	0.001	119	Schizosaccharomyces cryophilus OY26
P56|Iso_109,Iso_110|I|SPAC24B11.06c	gi|213410557|ref|XP_002176048.1|	0.001	44	Schizosaccharomyces japonicus yFS275
P56|Iso_109,Iso_110|I|SPAC24B11.06c	gi|891579707|ref|XP_013021804.1|	0.002	99	Schizosaccharomyces cryophilus OY26
P56|Iso_109,Iso_110|I|SPAC24B11.06c	gi|891551397|ref|XP_013017293.1|	0.002	109	Schizosaccharomyces octosporus yFS286
P56|Iso_109,Iso_110|I|SPAC24B11.06c	gi|891562651|ref|XP_013018637.1|	0.002	34	Schizosaccharomyces octosporus yFS286
P56|Iso_109,Iso_110|I|SPAC24B11.06c	gi|891556798|ref|XP_013017869.1|	0.003	57	Schizosaccharomyces octosporus yFS286
P56|Iso_109,Iso_110|I|SPAC24B11.06c	gi|213401345|ref|XP_002171445.1|	0.004	95	Schizosaccharomyces japonicus yFS275
P56|Iso_109,Iso_110|I|SPAC24B11.06c	gi|213409265|ref|XP_002175403.1|	0.006	30	Schizosaccharomyces japonicus yFS275
P56|Iso_109,Iso_110|I|SPAC24B11.06c	gi|891599099|ref|XP_013025208.1|	0.015	93	Schizosaccharomyces cryophilus OY26
P56|Iso_109,Iso_110|I|SPAC24B11.06c	gi|213406273|ref|XP_002173908.1|	0.02	106	Schizosaccharomyces japonicus yFS275
P56|Iso_109,Iso_110|I|SPAC24B11.06c	gi|891567671|ref|XP_013019260.1|	0.025	93	Schizosaccharomyces octosporus yFS286
P56|Iso_109,Iso_110|I|SPAC24B11.06c	gi|891572352|ref|XP_013020860.1|	0.03	35	Schizosaccharomyces cryophilus OY26
P222|Iso_400|I|SPAC13C5.05c	gi|891602264|ref|XP_013025699.1|	0	499	Schizosaccharomyces cryophilus OY26
P222|Iso_400|I|SPAC13C5.05c	gi|891545579|ref|XP_013016391.1|	0	499	Schizosaccharomyces octosporus yFS286
P222|Iso_400|I|SPAC13C5.05c	gi|213408174|ref|XP_002174858.1|	3.08e-170	507	Schizosaccharomyces japonicus yFS275
P222|Iso_400|I|SPAC13C5.05c	gi|891579346|ref|XP_013021709.1|	3.41e-118	507	Schizosaccharomyces cryophilus OY26
P222|Iso_400|I|SPAC13C5.05c	gi|213402943|ref|XP_002172244.1|	7.36e-118	491	Schizosaccharomyces japonicus yFS275
P222|Iso_400|I|SPAC13C5.05c	gi|891542545|ref|XP_013015966.1|	2.01e-112	505	Schizosaccharomyces octosporus yFS286
P446|Iso_817,Iso_819,Iso_821|I|SPAC22G7.09c	gi|891542573|ref|XP_013015980.1|	1.29e-17	42	Schizosaccharomyces octosporus yFS286
P446|Iso_817,Iso_819,Iso_821|I|SPAC22G7.09c	gi|891579318|ref|XP_013021695.1|	4.97e-17	42	Schizosaccharomyces cryophilus OY26
P446|Iso_817,Iso_819,Iso_821|I|SPAC22G7.09c	gi|745750493|ref|XP_002172229.2|	7.93e-14	36	Schizosaccharomyces japonicus yFS275
P556|Iso_993|I|SPAC1687.12c	gi|891542715|ref|XP_013016051.1|	9.01e-122	194	Schizosaccharomyces octosporus yFS286
P556|Iso_993|I|SPAC1687.12c	gi|891593933|ref|XP_013024351.1|	3.16e-121	194	Schizosaccharomyces cryophilus OY26
P556|Iso_993|I|SPAC1687.12c	gi|213402433|ref|XP_002171989.1|	3.84e-115	194	Schizosaccharomyces japonicus yFS275
P649|Iso_1162|I|SPAC139.01c	gi|891593401|ref|XP_013024312.1|	5.22e-25	99	Schizosaccharomyces cryophilus OY26
P649|Iso_1162|I|SPAC139.01c	gi|891543072|ref|XP_013016091.1|	1.54e-20	101	Schizosaccharomyces octosporus yFS286
P649|Iso_1162|I|SPAC139.01c	gi|745750601|ref|XP_002171941.2|	1.72e-14	94	Schizosaccharomyces japonicus yFS275
P754|Iso_1335|I|SPAC22A12.01c	gi|891592884|ref|XP_013024256.1|	0	473	Schizosaccharomyces cryophilus OY26
P754|Iso_1335|I|SPAC22A12.01c	gi|891544287|ref|XP_013016146.1|	0	472	Schizosaccharomyces octosporus yFS286
P754|Iso_1335|I|SPAC22A12.01c	gi|213408198|ref|XP_002174870.1|	0	460	Schizosaccharomyces japonicus yFS275
P754|Iso_1335|I|SPAC22A12.01c	gi|891585784|ref|XP_013022842.1|	0.002	94	Schizosaccharomyces cryophilus OY26
P758|Iso_1342|I|SPAC22A12.08c	gi|891544671|ref|XP_013016153.1|	0	545	Schizosaccharomyces octosporus yFS286
P758|Iso_1342|I|SPAC22A12.08c	gi|891592870|ref|XP_013024249.1|	0	551	Schizosaccharomyces cryophilus OY26
P758|Iso_1342|I|SPAC22A12.08c	gi|213409321|ref|XP_002175431.1|	4.48e-159	338	Schizosaccharomyces japonicus yFS275
P758|Iso_1342|I|SPAC22A12.08c	gi|213405529|ref|XP_002173536.1|	5.36e-76	322	Schizosaccharomyces japonicus yFS275
P758|Iso_1342|I|SPAC22A12.08c	gi|891579691|ref|XP_013021801.1|	0.002	94	Schizosaccharomyces cryophilus OY26
P758|Iso_1342|I|SPAC22A12.08c	gi|213402985|ref|XP_002172265.1|	0.033	71	Schizosaccharomyces japonicus yFS275
P760|Iso_1344,Iso_1357,Iso_1371|I|SPAC22A12.08c	gi|891544671|ref|XP_013016153.1|	0	351	Schizosaccharomyces octosporus yFS286
P760|Iso_1344,Iso_1357,Iso_1371|I|SPAC22A12.08c	gi|891592870|ref|XP_013024249.1|	0	334	Schizosaccharomyces cryophilus OY26
P760|Iso_1344,Iso_1357,Iso_1371|I|SPAC22A12.08c	gi|213409321|ref|XP_002175431.1|	8.44e-162	338	Schizosaccharomyces japonicus yFS275
P760|Iso_1344,Iso_1357,Iso_1371|I|SPAC22A12.08c	gi|213405529|ref|XP_002173536.1|	1.47e-78	321	Schizosaccharomyces japonicus yFS275
P762|Iso_1346,Iso_1364|I|SPAC22A12.08c	gi|891544671|ref|XP_013016153.1|	0	350	Schizosaccharomyces octosporus yFS286
P762|Iso_1346,Iso_1364|I|SPAC22A12.08c	gi|891592870|ref|XP_013024249.1|	0	350	Schizosaccharomyces cryophilus OY26
P762|Iso_1346,Iso_1364|I|SPAC22A12.08c	gi|213409321|ref|XP_002175431.1|	1.07e-161	338	Schizosaccharomyces japonicus yFS275
P762|Iso_1346,Iso_1364|I|SPAC22A12.08c	gi|213405529|ref|XP_002173536.1|	1.28e-78	321	Schizosaccharomyces japonicus yFS275
P765|Iso_1349,Iso_1353|I|SPAC22A12.08c	gi|891592870|ref|XP_013024249.1|	1.04e-24	59	Schizosaccharomyces cryophilus OY26
P765|Iso_1349,Iso_1353|I|SPAC22A12.08c	gi|891544671|ref|XP_013016153.1|	1.88e-23	53	Schizosaccharomyces octosporus yFS286
P765|Iso_1349,Iso_1353|I|SPAC22A12.08c	gi|213409321|ref|XP_002175431.1|	0.000444	57	Schizosaccharomyces japonicus yFS275
P837|Iso_1493|I|SPAPB17E12.06	gi|891592782|ref|XP_013024205.1|	1.22e-39	165	Schizosaccharomyces cryophilus OY26
P837|Iso_1493|I|SPAPB17E12.06	gi|891545095|ref|XP_013016197.1|	1.32e-33	165	Schizosaccharomyces octosporus yFS286
P837|Iso_1493|I|SPAPB17E12.06	gi|745752152|ref|XP_002174481.2|	1.96e-15	161	Schizosaccharomyces japonicus yFS275
P1247|Iso_2173|I|SPAPB1A10.10c	gi|891559729|ref|XP_013018260.1|	1.08e-83	149	Schizosaccharomyces octosporus yFS286
P1247|Iso_2173|I|SPAPB1A10.10c	gi|891585453|ref|XP_013022677.1|	1.68e-81	149	Schizosaccharomyces cryophilus OY26
P1247|Iso_2173|I|SPAPB1A10.10c	gi|745752052|ref|XP_002174240.2|	2.31e-61	150	Schizosaccharomyces japonicus yFS275
P1247|Iso_2173|I|SPAPB1A10.10c	gi|891557201|ref|XP_013018054.1|	8.76e-51	150	Schizosaccharomyces octosporus yFS286
P1247|Iso_2173|I|SPAPB1A10.10c	gi|213407064|ref|XP_002174303.1|	1.76e-50	150	Schizosaccharomyces japonicus yFS275
P1247|Iso_2173|I|SPAPB1A10.10c	gi|891572570|ref|XP_013020881.1|	7e-50	150	Schizosaccharomyces cryophilus OY26
P1247|Iso_2173|I|SPAPB1A10.10c	gi|891578288|ref|XP_013021464.1|	4.29e-21	122	Schizosaccharomyces cryophilus OY26
P1247|Iso_2173|I|SPAPB1A10.10c	gi|891554538|ref|XP_013017711.1|	8.08e-21	122	Schizosaccharomyces octosporus yFS286
P1247|Iso_2173|I|SPAPB1A10.10c	gi|745752322|ref|XP_002176098.2|	2.21e-20	151	Schizosaccharomyces japonicus yFS275
P1247|Iso_2173|I|SPAPB1A10.10c	gi|745753980|ref|XP_002172629.2|	6.11e-19	122	Schizosaccharomyces japonicus yFS275
P1247|Iso_2173|I|SPAPB1A10.10c	gi|891544693|ref|XP_013016164.1|	5.46e-18	151	Schizosaccharomyces octosporus yFS286
P1247|Iso_2173|I|SPAPB1A10.10c	gi|891592848|ref|XP_013024238.1|	7.05e-18	151	Schizosaccharomyces cryophilus OY26
P1247|Iso_2173|I|SPAPB1A10.10c	gi|745750347|ref|XP_002173841.2|	6.95e-17	126	Schizosaccharomyces japonicus yFS275
P1247|Iso_2173|I|SPAPB1A10.10c	gi|891574090|ref|XP_013020982.1|	3.44e-16	118	Schizosaccharomyces cryophilus OY26
P1247|Iso_2173|I|SPAPB1A10.10c	gi|891558529|ref|XP_013018165.1|	3.97e-16	118	Schizosaccharomyces octosporus yFS286
P1247|Iso_2173|I|SPAPB1A10.10c	gi|891587731|ref|XP_013023169.1|	6.45e-16	113	Schizosaccharomyces cryophilus OY26
P1247|Iso_2173|I|SPAPB1A10.10c	gi|213408535|ref|XP_002175038.1|	7.37e-16	113	Schizosaccharomyces japonicus yFS275
P1247|Iso_2173|I|SPAPB1A10.10c	gi|891576902|ref|XP_013020630.1|	7.37e-16	113	Schizosaccharomyces octosporus yFS286
P1247|Iso_2173|I|SPAPB1A10.10c	gi|891560592|ref|XP_013018487.1|	9.41e-16	153	Schizosaccharomyces octosporus yFS286
P1247|Iso_2173|I|SPAPB1A10.10c	gi|891575552|ref|XP_013020499.1|	2.47e-15	116	Schizosaccharomyces octosporus yFS286
P1247|Iso_2173|I|SPAPB1A10.10c	gi|891588844|ref|XP_013023302.1|	2.56e-15	115	Schizosaccharomyces cryophilus OY26
P1247|Iso_2173|I|SPAPB1A10.10c	gi|891583772|ref|XP_013022452.1|	3.57e-15	153	Schizosaccharomyces cryophilus OY26
P1247|Iso_2173|I|SPAPB1A10.10c	gi|213401875|ref|XP_002171710.1|	9e-15	115	Schizosaccharomyces japonicus yFS275
P1247|Iso_2173|I|SPAPB1A10.10c	gi|213409369|ref|XP_002175455.1|	1.84e-12	110	Schizosaccharomyces japonicus yFS275
P1247|Iso_2173|I|SPAPB1A10.10c	gi|891578581|ref|XP_013020715.1|	1.39e-10	114	Schizosaccharomyces octosporus yFS286
P1247|Iso_2173|I|SPAPB1A10.10c	gi|213403856|ref|XP_002172700.1|	2.65e-10	122	Schizosaccharomyces japonicus yFS275
P1247|Iso_2173|I|SPAPB1A10.10c	gi|891565466|ref|XP_013018972.1|	2.74e-10	122	Schizosaccharomyces octosporus yFS286;Schizosaccharomyces cryophilus OY26
P1247|Iso_2173|I|SPAPB1A10.10c	gi|891586531|ref|XP_013023081.1|	1.37e-09	114	Schizosaccharomyces cryophilus OY26
P1247|Iso_2173|I|SPAPB1A10.10c	gi|213407658|ref|XP_002174600.1|	2e-09	132	Schizosaccharomyces japonicus yFS275
P1247|Iso_2173|I|SPAPB1A10.10c	gi|213409968|ref|XP_002175754.1|	5.08e-09	138	Schizosaccharomyces japonicus yFS275
P1247|Iso_2173|I|SPAPB1A10.10c	gi|891577587|ref|XP_013020665.1|	2.3e-08	127	Schizosaccharomyces octosporus yFS286
P1247|Iso_2173|I|SPAPB1A10.10c	gi|891587163|ref|XP_013023131.1|	4.06e-08	127	Schizosaccharomyces cryophilus OY26
P1247|Iso_2173|I|SPAPB1A10.10c	gi|891549343|ref|XP_013016909.1|	4.34e-07	127	Schizosaccharomyces octosporus yFS286
P1247|Iso_2173|I|SPAPB1A10.10c	gi|891592287|ref|XP_013023963.1|	4.38e-07	127	Schizosaccharomyces cryophilus OY26
P1247|Iso_2173|I|SPAPB1A10.10c	gi|213406217|ref|XP_002173880.1|	4.55e-07	127	Schizosaccharomyces japonicus yFS275
P1247|Iso_2173|I|SPAPB1A10.10c	gi|891588862|ref|XP_013023311.1|	1.66e-06	126	Schizosaccharomyces cryophilus OY26
P1247|Iso_2173|I|SPAPB1A10.10c	gi|891575518|ref|XP_013020490.1|	1.72e-06	126	Schizosaccharomyces octosporus yFS286
P1247|Iso_2173|I|SPAPB1A10.10c	gi|891548037|ref|XP_013016642.1|	3.03e-06	116	Schizosaccharomyces octosporus yFS286
P1247|Iso_2173|I|SPAPB1A10.10c	gi|213406079|ref|XP_002173811.1|	5.26e-06	119	Schizosaccharomyces japonicus yFS275
P1247|Iso_2173|I|SPAPB1A10.10c	gi|891543288|ref|XP_013016102.1|	9.14e-06	121	Schizosaccharomyces octosporus yFS286
P1247|Iso_2173|I|SPAPB1A10.10c	gi|745750693|ref|XP_002171704.2|	1.11e-05	126	Schizosaccharomyces japonicus yFS275
P1247|Iso_2173|I|SPAPB1A10.10c	gi|213405601|ref|XP_002173572.1|	1.19e-05	122	Schizosaccharomyces japonicus yFS275
P1247|Iso_2173|I|SPAPB1A10.10c	gi|891593200|ref|XP_013024300.1|	1.38e-05	134	Schizosaccharomyces cryophilus OY26
P1247|Iso_2173|I|SPAPB1A10.10c	gi|891589779|ref|XP_013023685.1|	1.54e-05	116	Schizosaccharomyces cryophilus OY26
P1247|Iso_2173|I|SPAPB1A10.10c	gi|891585479|ref|XP_013022690.1|	6.83e-05	68	Schizosaccharomyces cryophilus OY26
P1247|Iso_2173|I|SPAPB1A10.10c	gi|213409668|ref|XP_002175604.1|	6.96e-05	68	Schizosaccharomyces japonicus yFS275
P1247|Iso_2173|I|SPAPB1A10.10c	gi|891559705|ref|XP_013018248.1|	7.17e-05	68	Schizosaccharomyces octosporus yFS286
P1247|Iso_2173|I|SPAPB1A10.10c	gi|745754166|ref|XP_002173014.2|	0.000222	132	Schizosaccharomyces japonicus yFS275
P1247|Iso_2173|I|SPAPB1A10.10c	gi|891579021|ref|XP_013021593.1|	0.000503	129	Schizosaccharomyces cryophilus OY26
P1247|Iso_2173|I|SPAPB1A10.10c	gi|891571962|ref|XP_013020063.1|	0.000564	129	Schizosaccharomyces octosporus yFS286
P1426|Iso_2489,Iso_2508|I|SPAC20H4.09	gi|891577595|ref|XP_013020667.1|	0	494	Schizosaccharomyces octosporus yFS286
P1426|Iso_2489,Iso_2508|I|SPAC20H4.09	gi|891587122|ref|XP_013023129.1|	0	493	Schizosaccharomyces cryophilus OY26
P1426|Iso_2489,Iso_2508|I|SPAC20H4.09	gi|213406221|ref|XP_002173882.1|	2.22e-142	483	Schizosaccharomyces japonicus yFS275
P1426|Iso_2489,Iso_2508|I|SPAC20H4.09	gi|891592840|ref|XP_013024234.1|	5.75e-93	480	Schizosaccharomyces cryophilus OY26
P1426|Iso_2489,Iso_2508|I|SPAC20H4.09	gi|891545037|ref|XP_013016168.1|	6.82e-92	480	Schizosaccharomyces octosporus yFS286
P1426|Iso_2489,Iso_2508|I|SPAC20H4.09	gi|891553993|ref|XP_013017535.1|	2.58e-91	491	Schizosaccharomyces octosporus yFS286
P1426|Iso_2489,Iso_2508|I|SPAC20H4.09	gi|213402199|ref|XP_002171872.1|	7.57e-91	492	Schizosaccharomyces japonicus yFS275
P1426|Iso_2489,Iso_2508|I|SPAC20H4.09	gi|891579258|ref|XP_013021666.1|	2.16e-90	483	Schizosaccharomyces cryophilus OY26
P1426|Iso_2489,Iso_2508|I|SPAC20H4.09	gi|891580321|ref|XP_013021860.1|	6.21e-90	491	Schizosaccharomyces cryophilus OY26
P1426|Iso_2489,Iso_2508|I|SPAC20H4.09	gi|891568658|ref|XP_013019512.1|	6.71e-89	488	Schizosaccharomyces octosporus yFS286
P1426|Iso_2489,Iso_2508|I|SPAC20H4.09	gi|745753954|ref|XP_002172564.2|	4.58e-88	491	Schizosaccharomyces japonicus yFS275
P1426|Iso_2489,Iso_2508|I|SPAC20H4.09	gi|891589411|ref|XP_013023585.1|	2.07e-87	488	Schizosaccharomyces cryophilus OY26
P1426|Iso_2489,Iso_2508|I|SPAC20H4.09	gi|891542637|ref|XP_013016012.1|	2.3e-87	479	Schizosaccharomyces octosporus yFS286
P1426|Iso_2489,Iso_2508|I|SPAC20H4.09	gi|213408507|ref|XP_002175024.1|	8.2e-87	479	Schizosaccharomyces japonicus yFS275
P1426|Iso_2489,Iso_2508|I|SPAC20H4.09	gi|213403268|ref|XP_002172406.1|	2.82e-86	489	Schizosaccharomyces japonicus yFS275
P1426|Iso_2489,Iso_2508|I|SPAC20H4.09	gi|891601518|ref|XP_013025565.1|	1.16e-80	487	Schizosaccharomyces cryophilus OY26
P1426|Iso_2489,Iso_2508|I|SPAC20H4.09	gi|891547801|ref|XP_013016524.1|	1.82e-80	430	Schizosaccharomyces octosporus yFS286
P1426|Iso_2489,Iso_2508|I|SPAC20H4.09	gi|891585802|ref|XP_013022851.1|	2.37e-43	466	Schizosaccharomyces cryophilus OY26
P1426|Iso_2489,Iso_2508|I|SPAC20H4.09	gi|213406946|ref|XP_002174244.1|	1.41e-42	434	Schizosaccharomyces japonicus yFS275
P1426|Iso_2489,Iso_2508|I|SPAC20H4.09	gi|891551064|ref|XP_013017127.1|	3.87e-41	437	Schizosaccharomyces octosporus yFS286
P1426|Iso_2489,Iso_2508|I|SPAC20H4.09	gi|891574977|ref|XP_013020349.1|	1.03e-35	419	Schizosaccharomyces octosporus yFS286
P1426|Iso_2489,Iso_2508|I|SPAC20H4.09	gi|891598842|ref|XP_013025080.1|	1.67e-33	419	Schizosaccharomyces cryophilus OY26
P1426|Iso_2489,Iso_2508|I|SPAC20H4.09	gi|213407802|ref|XP_002174672.1|	4.94e-29	423	Schizosaccharomyces japonicus yFS275
P1426|Iso_2489,Iso_2508|I|SPAC20H4.09	gi|213404826|ref|XP_002173185.1|	1e-28	337	Schizosaccharomyces japonicus yFS275
P1426|Iso_2489,Iso_2508|I|SPAC20H4.09	gi|891547873|ref|XP_013016560.1|	2.98e-24	490	Schizosaccharomyces octosporus yFS286
P1426|Iso_2489,Iso_2508|I|SPAC20H4.09	gi|891600896|ref|XP_013025529.1|	1.9e-23	353	Schizosaccharomyces cryophilus OY26
P1426|Iso_2489,Iso_2508|I|SPAC20H4.09	gi|745752328|ref|XP_002176094.2|	9.3e-17	125	Schizosaccharomyces japonicus yFS275
P1426|Iso_2489,Iso_2508|I|SPAC20H4.09	gi|213405014|ref|XP_002173279.1|	1.34e-16	265	Schizosaccharomyces japonicus yFS275
P1563|Iso_2730|I|SPAC13G7.11	gi|891588668|ref|XP_013023214.1|	5.14e-77	201	Schizosaccharomyces cryophilus OY26
P1563|Iso_2730|I|SPAC13G7.11	gi|891576206|ref|XP_013020585.1|	1.08e-76	201	Schizosaccharomyces octosporus yFS286
P1563|Iso_2730|I|SPAC13G7.11	gi|213404760|ref|XP_002173152.1|	5.04e-43	201	Schizosaccharomyces japonicus yFS275
P1584|Iso_2762|I|SPAC6C3.09	gi|891576097|ref|XP_013020576.1|	2.41e-51	239	Schizosaccharomyces octosporus yFS286
P1584|Iso_2762|I|SPAC6C3.09	gi|891588686|ref|XP_013023223.1|	7.41e-50	239	Schizosaccharomyces cryophilus OY26
P1584|Iso_2762|I|SPAC6C3.09	gi|213402899|ref|XP_002172222.1|	4.46e-25	262	Schizosaccharomyces japonicus yFS275
P1644|Iso_2857|I|SPAC22H10.12c	gi|213405713|ref|XP_002173628.1|	0	367	Schizosaccharomyces japonicus yFS275
P1644|Iso_2857|I|SPAC22H10.12c	gi|891575797|ref|XP_013020550.1|	0	366	Schizosaccharomyces octosporus yFS286
P1644|Iso_2857|I|SPAC22H10.12c	gi|891588736|ref|XP_013023248.1|	0	366	Schizosaccharomyces cryophilus OY26
P1644|Iso_2857|I|SPAC22H10.12c	gi|891547869|ref|XP_013016558.1|	2.22e-14	299	Schizosaccharomyces octosporus yFS286
P1644|Iso_2857|I|SPAC22H10.12c	gi|891600900|ref|XP_013025531.1|	6.51e-14	297	Schizosaccharomyces cryophilus OY26
P1644|Iso_2857|I|SPAC22H10.12c	gi|213405018|ref|XP_002173281.1|	4.93e-12	231	Schizosaccharomyces japonicus yFS275
P1722|Iso_2980|I|SPAC23H3.15c	gi|891582568|ref|XP_013022265.1|	4.65e-11	36	Schizosaccharomyces cryophilus OY26
P1722|Iso_2980|I|SPAC23H3.15c	gi|213405753|ref|XP_002173648.1|	2.35e-09	43	Schizosaccharomyces japonicus yFS275
P1722|Iso_2980|I|SPAC23H3.15c	gi|891562703|ref|XP_013018663.1|	2.38e-09	59	Schizosaccharomyces octosporus yFS286
P1722|Iso_2980|I|SPAC23H3.15c	gi|891585796|ref|XP_013022848.1|	0.023	34	Schizosaccharomyces cryophilus OY26
P1734|Iso_2998|I|SPAC25H1.09	gi|891562685|ref|XP_013018654.1|	2.03e-54	117	Schizosaccharomyces octosporus yFS286
P1734|Iso_2998|I|SPAC25H1.09	gi|891582588|ref|XP_013022275.1|	2.55e-48	111	Schizosaccharomyces cryophilus OY26
P1734|Iso_2998|I|SPAC25H1.09	gi|213405737|ref|XP_002173640.1|	2.53e-44	114	Schizosaccharomyces japonicus yFS275
P1734|Iso_2998|I|SPAC25H1.09	gi|213410200|ref|XP_002175870.1|	1.02e-10	92	Schizosaccharomyces japonicus yFS275
P1734|Iso_2998|I|SPAC25H1.09	gi|891563780|ref|XP_013018878.1|	5.75e-08	120	Schizosaccharomyces octosporus yFS286
P1734|Iso_2998|I|SPAC25H1.09	gi|891596004|ref|XP_013024746.1|	1e-07	92	Schizosaccharomyces cryophilus OY26
P1734|Iso_2998|I|SPAC25H1.09	gi|745750463|ref|XP_002172299.2|	7.3e-05	101	Schizosaccharomyces japonicus yFS275
P2032|Iso_3509|I|SPAC31G5.12c	gi|891578891|ref|XP_013021561.1|	2.82e-125	203	Schizosaccharomyces cryophilus OY26
P2032|Iso_3509|I|SPAC31G5.12c	gi|891572281|ref|XP_013020094.1|	7.07e-122	203	Schizosaccharomyces octosporus yFS286
P2032|Iso_3509|I|SPAC31G5.12c	gi|745750435|ref|XP_002174083.2|	2.23e-89	205	Schizosaccharomyces japonicus yFS275
P2198|Iso_3782|I|SPAC6G9.11	gi|891568568|ref|XP_013019467.1|	2.18e-33	54	Schizosaccharomyces octosporus yFS286
P2198|Iso_3782|I|SPAC6G9.11	gi|891589319|ref|XP_013023539.1|	8.15e-33	54	Schizosaccharomyces cryophilus OY26
P2198|Iso_3782|I|SPAC6G9.11	gi|213405363|ref|XP_002173453.1|	1.57e-15	54	Schizosaccharomyces japonicus yFS275
P2277|Iso_3899|I|SPAC959.04c	gi|891589163|ref|XP_013023461.1|	1.01e-59	219	Schizosaccharomyces cryophilus OY26
P2277|Iso_3899|I|SPAC959.04c	gi|891568464|ref|XP_013019415.1|	4.97e-59	219	Schizosaccharomyces octosporus yFS286
P2277|Iso_3899|I|SPAC959.04c	gi|745752378|ref|XP_002175977.2|	1.4e-25	213	Schizosaccharomyces japonicus yFS275
P2277|Iso_3899|I|SPAC959.04c	gi|213403035|ref|XP_002172290.1|	8.94e-12	176	Schizosaccharomyces japonicus yFS275
P2277|Iso_3899|I|SPAC959.04c	gi|891580319|ref|XP_013021859.1|	6.04e-09	178	Schizosaccharomyces cryophilus OY26
P2277|Iso_3899|I|SPAC959.04c	gi|213403488|ref|XP_002172516.1|	5.23e-08	188	Schizosaccharomyces japonicus yFS275
P2277|Iso_3899|I|SPAC959.04c	gi|891553995|ref|XP_013017536.1|	5.87e-08	176	Schizosaccharomyces octosporus yFS286
P2277|Iso_3899|I|SPAC959.04c	gi|891592197|ref|XP_013023918.1|	9.26e-08	184	Schizosaccharomyces cryophilus OY26
P2277|Iso_3899|I|SPAC959.04c	gi|891548618|ref|XP_013016865.1|	5.82e-07	184	Schizosaccharomyces octosporus yFS286
P2277|Iso_3899|I|SPAC959.04c	gi|213402201|ref|XP_002171873.1|	8.84e-07	222	Schizosaccharomyces japonicus yFS275
P2277|Iso_3899|I|SPAC959.04c	gi|891574787|ref|XP_013021056.1|	1.07e-06	176	Schizosaccharomyces cryophilus OY26
P2277|Iso_3899|I|SPAC959.04c	gi|891551349|ref|XP_013017269.1|	1.87e-06	175	Schizosaccharomyces octosporus yFS286
P2277|Iso_3899|I|SPAC959.04c	gi|891556948|ref|XP_013017929.1|	0.00035	251	Schizosaccharomyces octosporus yFS286
P2277|Iso_3899|I|SPAC959.04c	gi|213406956|ref|XP_002174249.1|	0.000433	232	Schizosaccharomyces japonicus yFS275
P2277|Iso_3899|I|SPAC959.04c	gi|891602775|ref|XP_013025952.1|	0.001	230	Schizosaccharomyces cryophilus OY26
P2277|Iso_3899|I|SPAC959.04c	gi|213405911|ref|XP_002173727.1|	0.021	100	Schizosaccharomyces japonicus yFS275
P2278|Iso_3903|I|SPAC959.04c	gi|891589163|ref|XP_013023461.1|	4.38e-46	175	Schizosaccharomyces cryophilus OY26
P2278|Iso_3903|I|SPAC959.04c	gi|891568464|ref|XP_013019415.1|	4.72e-46	175	Schizosaccharomyces octosporus yFS286
P2278|Iso_3903|I|SPAC959.04c	gi|745752378|ref|XP_002175977.2|	1.26e-21	163	Schizosaccharomyces japonicus yFS275
P2278|Iso_3903|I|SPAC959.04c	gi|891580319|ref|XP_013021859.1|	1.25e-06	131	Schizosaccharomyces cryophilus OY26
P2278|Iso_3903|I|SPAC959.04c	gi|213403035|ref|XP_002172290.1|	1.28e-06	127	Schizosaccharomyces japonicus yFS275
P2278|Iso_3903|I|SPAC959.04c	gi|891553995|ref|XP_013017536.1|	3.6e-06	129	Schizosaccharomyces octosporus yFS286
P2278|Iso_3903|I|SPAC959.04c	gi|891592197|ref|XP_013023918.1|	0.000133	135	Schizosaccharomyces cryophilus OY26
P2278|Iso_3903|I|SPAC959.04c	gi|213402201|ref|XP_002171873.1|	0.000209	186	Schizosaccharomyces japonicus yFS275
P2278|Iso_3903|I|SPAC959.04c	gi|891548618|ref|XP_013016865.1|	0.000313	135	Schizosaccharomyces octosporus yFS286
P2278|Iso_3903|I|SPAC959.04c	gi|891574787|ref|XP_013021056.1|	0.000568	129	Schizosaccharomyces cryophilus OY26
P2278|Iso_3903|I|SPAC959.04c	gi|213403488|ref|XP_002172516.1|	0.000889	141	Schizosaccharomyces japonicus yFS275
P2278|Iso_3903|I|SPAC959.04c	gi|891551349|ref|XP_013017269.1|	0.013	128	Schizosaccharomyces octosporus yFS286
P2357|Iso_4032|I|SPAC328.05	gi|891585325|ref|XP_013022613.1|	5.4e-98	312	Schizosaccharomyces cryophilus OY26
P2357|Iso_4032|I|SPAC328.05	gi|891559854|ref|XP_013018322.1|	2.62e-97	302	Schizosaccharomyces octosporus yFS286
P2357|Iso_4032|I|SPAC328.05	gi|745754048|ref|XP_002172781.2|	9.82e-83	280	Schizosaccharomyces japonicus yFS275
P2357|Iso_4032|I|SPAC328.05	gi|891558288|ref|XP_013018153.1|	2.73e-16	210	Schizosaccharomyces octosporus yFS286
P2357|Iso_4032|I|SPAC328.05	gi|213401557|ref|XP_002171551.1|	2.15e-13	208	Schizosaccharomyces japonicus yFS275
P2357|Iso_4032|I|SPAC328.05	gi|891559715|ref|XP_013018253.1|	2.33e-13	222	Schizosaccharomyces octosporus yFS286
P2357|Iso_4032|I|SPAC328.05	gi|891585469|ref|XP_013022685.1|	2.7e-13	214	Schizosaccharomyces cryophilus OY26
P2357|Iso_4032|I|SPAC328.05	gi|745752138|ref|XP_002174442.2|	2.04e-12	223	Schizosaccharomyces japonicus yFS275
P2357|Iso_4032|I|SPAC328.05	gi|891545324|ref|XP_013016311.1|	2.47e-12	206	Schizosaccharomyces octosporus yFS286
P2357|Iso_4032|I|SPAC328.05	gi|891595617|ref|XP_013024555.1|	6.04e-12	206	Schizosaccharomyces cryophilus OY26
P2357|Iso_4032|I|SPAC328.05	gi|213403408|ref|XP_002172476.1|	3.99e-11	206	Schizosaccharomyces japonicus yFS275
P2357|Iso_4032|I|SPAC328.05	gi|213409529|ref|XP_002175535.1|	4.53e-11	206	Schizosaccharomyces japonicus yFS275
P2357|Iso_4032|I|SPAC328.05	gi|891574360|ref|XP_013020993.1|	8.33e-11	174	Schizosaccharomyces cryophilus OY26
P2357|Iso_4032|I|SPAC328.05	gi|745752374|ref|XP_002175985.2|	1.3e-10	232	Schizosaccharomyces japonicus yFS275
P2357|Iso_4032|I|SPAC328.05	gi|213408745|ref|XP_002175143.1|	1.41e-10	76	Schizosaccharomyces japonicus yFS275
P2357|Iso_4032|I|SPAC328.05	gi|891578847|ref|XP_013021550.1|	3.17e-10	208	Schizosaccharomyces cryophilus OY26
P2357|Iso_4032|I|SPAC328.05	gi|745750405|ref|XP_002174018.2|	6.55e-10	207	Schizosaccharomyces japonicus yFS275
P2357|Iso_4032|I|SPAC328.05	gi|891550764|ref|XP_013016977.1|	1.17e-09	205	Schizosaccharomyces octosporus yFS286
P2357|Iso_4032|I|SPAC328.05	gi|891572391|ref|XP_013020105.1|	1.64e-09	208	Schizosaccharomyces octosporus yFS286
P2357|Iso_4032|I|SPAC328.05	gi|891588956|ref|XP_013023358.1|	4.46e-09	120	Schizosaccharomyces cryophilus OY26
P2357|Iso_4032|I|SPAC328.05	gi|891582056|ref|XP_013022022.1|	2.03e-08	259	Schizosaccharomyces cryophilus OY26
P2357|Iso_4032|I|SPAC328.05	gi|891571539|ref|XP_013019913.1|	2.56e-08	266	Schizosaccharomyces octosporus yFS286
P2357|Iso_4032|I|SPAC328.05	gi|891583497|ref|XP_013022421.1|	2.77e-08	120	Schizosaccharomyces cryophilus OY26
P2357|Iso_4032|I|SPAC328.05	gi|891561050|ref|XP_013018514.1|	7.39e-08	77	Schizosaccharomyces octosporus yFS286
P2357|Iso_4032|I|SPAC328.05	gi|213403776|ref|XP_002172660.1|	8.82e-08	136	Schizosaccharomyces japonicus yFS275
P2357|Iso_4032|I|SPAC328.05	gi|891602064|ref|XP_013025599.1|	8.99e-08	185	Schizosaccharomyces cryophilus OY26
P2357|Iso_4032|I|SPAC328.05	gi|745750691|ref|XP_002171705.2|	1.06e-07	75	Schizosaccharomyces japonicus yFS275
P2357|Iso_4032|I|SPAC328.05	gi|891547271|ref|XP_013016491.1|	1.2e-07	198	Schizosaccharomyces octosporus yFS286
P2357|Iso_4032|I|SPAC328.05	gi|891559781|ref|XP_013018286.1|	1.91e-07	227	Schizosaccharomyces octosporus yFS286
P2357|Iso_4032|I|SPAC328.05	gi|745752628|ref|XP_002174981.2|	1.92e-07	185	Schizosaccharomyces japonicus yFS275
P2357|Iso_4032|I|SPAC328.05	gi|891575530|ref|XP_013021240.1|	3.51e-07	286	Schizosaccharomyces cryophilus OY26
P2357|Iso_4032|I|SPAC328.05	gi|213404256|ref|XP_002172900.1|	3.85e-07	57	Schizosaccharomyces japonicus yFS275
P2357|Iso_4032|I|SPAC328.05	gi|891585399|ref|XP_013022650.1|	1.74e-06	228	Schizosaccharomyces cryophilus OY26
P2357|Iso_4032|I|SPAC328.05	gi|891571298|ref|XP_013019793.1|	2.61e-06	148	Schizosaccharomyces octosporus yFS286
P2357|Iso_4032|I|SPAC328.05	gi|213404382|ref|XP_002172963.1|	2.65e-06	67	Schizosaccharomyces japonicus yFS275
P2357|Iso_4032|I|SPAC328.05	gi|891582150|ref|XP_013022069.1|	2.75e-06	69	Schizosaccharomyces cryophilus OY26
P2357|Iso_4032|I|SPAC328.05	gi|213401961|ref|XP_002171753.1|	3.01e-06	252	Schizosaccharomyces japonicus yFS275
P2357|Iso_4032|I|SPAC328.05	gi|891602368|ref|XP_013025749.1|	4.07e-06	78	Schizosaccharomyces cryophilus OY26
P2357|Iso_4032|I|SPAC328.05	gi|891584189|ref|XP_013022483.1|	4.29e-06	88	Schizosaccharomyces cryophilus OY26
P2357|Iso_4032|I|SPAC328.05	gi|891547355|ref|XP_013016495.1|	7.32e-06	258	Schizosaccharomyces octosporus yFS286
P2357|Iso_4032|I|SPAC328.05	gi|745750665|ref|XP_002171782.2|	7.84e-06	76	Schizosaccharomyces japonicus yFS275
P2357|Iso_4032|I|SPAC328.05	gi|891560215|ref|XP_013018454.1|	9.42e-06	75	Schizosaccharomyces octosporus yFS286
P2357|Iso_4032|I|SPAC328.05	gi|891575328|ref|XP_013020443.1|	1.29e-05	86	Schizosaccharomyces octosporus yFS286
P2357|Iso_4032|I|SPAC328.05	gi|745753896|ref|XP_002172424.2|	1.52e-05	95	Schizosaccharomyces japonicus yFS275
P2357|Iso_4032|I|SPAC328.05	gi|213402889|ref|XP_002172217.1|	1.54e-05	86	Schizosaccharomyces japonicus yFS275
P2357|Iso_4032|I|SPAC328.05	gi|891571453|ref|XP_013019870.1|	1.57e-05	69	Schizosaccharomyces octosporus yFS286
P2357|Iso_4032|I|SPAC328.05	gi|891602180|ref|XP_013025657.1|	1.8e-05	93	Schizosaccharomyces cryophilus OY26
P2357|Iso_4032|I|SPAC328.05	gi|213406714|ref|XP_002174128.1|	2.19e-05	110	Schizosaccharomyces japonicus yFS275
P2357|Iso_4032|I|SPAC328.05	gi|891588860|ref|XP_013023310.1|	2.36e-05	75	Schizosaccharomyces cryophilus OY26
P2357|Iso_4032|I|SPAC328.05	gi|891556978|ref|XP_013017944.1|	3.35e-05	211	Schizosaccharomyces octosporus yFS286
P2357|Iso_4032|I|SPAC328.05	gi|213409487|ref|XP_002175514.1|	3.66e-05	74	Schizosaccharomyces japonicus yFS275
P2357|Iso_4032|I|SPAC328.05	gi|213406019|ref|XP_002173781.1|	3.76e-05	76	Schizosaccharomyces japonicus yFS275
P2357|Iso_4032|I|SPAC328.05	gi|891551115|ref|XP_013017152.1|	3.98e-05	67	Schizosaccharomyces octosporus yFS286
P2357|Iso_4032|I|SPAC328.05	gi|891575522|ref|XP_013020491.1|	5.44e-05	75	Schizosaccharomyces octosporus yFS286
P2357|Iso_4032|I|SPAC328.05	gi|891592427|ref|XP_013024033.1|	5.46e-05	63	Schizosaccharomyces cryophilus OY26
P2357|Iso_4032|I|SPAC328.05	gi|891546179|ref|XP_013016431.1|	6.08e-05	93	Schizosaccharomyces octosporus yFS286
P2357|Iso_4032|I|SPAC328.05	gi|891555160|ref|XP_013017762.1|	6.12e-05	54	Schizosaccharomyces octosporus yFS286
P2357|Iso_4032|I|SPAC328.05	gi|745754238|ref|XP_002173239.2|	6.28e-05	70	Schizosaccharomyces japonicus yFS275
P2357|Iso_4032|I|SPAC328.05	gi|891577222|ref|XP_013021413.1|	7.02e-05	54	Schizosaccharomyces cryophilus OY26
P2357|Iso_4032|I|SPAC328.05	gi|891602745|ref|XP_013025937.1|	0.000127	211	Schizosaccharomyces cryophilus OY26
P2357|Iso_4032|I|SPAC328.05	gi|891585754|ref|XP_013022827.1|	0.000148	67	Schizosaccharomyces cryophilus OY26
P2357|Iso_4032|I|SPAC328.05	gi|213409309|ref|XP_002175425.1|	0.00016	79	Schizosaccharomyces japonicus yFS275
P2357|Iso_4032|I|SPAC328.05	gi|213402043|ref|XP_002171794.1|	0.000226	83	Schizosaccharomyces japonicus yFS275
P2357|Iso_4032|I|SPAC328.05	gi|891585728|ref|XP_013022814.1|	0.000345	77	Schizosaccharomyces cryophilus OY26
P2357|Iso_4032|I|SPAC328.05	gi|891602056|ref|XP_013025595.1|	0.000428	262	Schizosaccharomyces cryophilus OY26
P2357|Iso_4032|I|SPAC328.05	gi|891565614|ref|XP_013019046.1|	0.000558	72	Schizosaccharomyces octosporus yFS286
P2357|Iso_4032|I|SPAC328.05	gi|213404764|ref|XP_002173154.1|	0.000612	105	Schizosaccharomyces japonicus yFS275
P2357|Iso_4032|I|SPAC328.05	gi|213402091|ref|XP_002171818.1|	0.000734	76	Schizosaccharomyces japonicus yFS275
P2357|Iso_4032|I|SPAC328.05	gi|891551141|ref|XP_013017165.1|	0.001	77	Schizosaccharomyces octosporus yFS286
P2357|Iso_4032|I|SPAC328.05	gi|213407694|ref|XP_002174618.1|	0.001	65	Schizosaccharomyces japonicus yFS275
P2357|Iso_4032|I|SPAC328.05	gi|891597312|ref|XP_013024943.1|	0.001	65	Schizosaccharomyces cryophilus OY26
P2357|Iso_4032|I|SPAC328.05	gi|891551139|ref|XP_013017164.1|	0.001	106	Schizosaccharomyces octosporus yFS286
P2357|Iso_4032|I|SPAC328.05	gi|891553416|ref|XP_013017462.1|	0.001	75	Schizosaccharomyces octosporus yFS286
P2357|Iso_4032|I|SPAC328.05	gi|213408577|ref|XP_002175059.1|	0.001	77	Schizosaccharomyces japonicus yFS275
P2357|Iso_4032|I|SPAC328.05	gi|891574362|ref|XP_013020238.1|	0.001	69	Schizosaccharomyces octosporus yFS286
P2357|Iso_4032|I|SPAC328.05	gi|891585730|ref|XP_013022815.1|	0.002	76	Schizosaccharomyces cryophilus OY26
P2357|Iso_4032|I|SPAC328.05	gi|213409235|ref|XP_002175388.1|	0.002	87	Schizosaccharomyces japonicus yFS275
P2357|Iso_4032|I|SPAC328.05	gi|891589712|ref|XP_013023681.1|	0.004	87	Schizosaccharomyces cryophilus OY26
P2357|Iso_4032|I|SPAC328.05	gi|891602326|ref|XP_013025730.1|	0.004	83	Schizosaccharomyces cryophilus OY26
P2357|Iso_4032|I|SPAC328.05	gi|745752208|ref|XP_002174580.2|	0.005	77	Schizosaccharomyces japonicus yFS275
P2357|Iso_4032|I|SPAC328.05	gi|891575660|ref|XP_013020522.1|	0.005	69	Schizosaccharomyces octosporus yFS286
P2357|Iso_4032|I|SPAC328.05	gi|213403115|ref|XP_002172330.1|	0.006	65	Schizosaccharomyces japonicus yFS275
P2357|Iso_4032|I|SPAC328.05	gi|213403896|ref|XP_002172720.1|	0.007	223	Schizosaccharomyces japonicus yFS275
P2357|Iso_4032|I|SPAC328.05	gi|891545422|ref|XP_013016360.1|	0.008	158	Schizosaccharomyces octosporus yFS286
P2357|Iso_4032|I|SPAC328.05	gi|213410335|ref|XP_002175937.1|	0.01	106	Schizosaccharomyces japonicus yFS275
P2357|Iso_4032|I|SPAC328.05	gi|891559831|ref|XP_013018311.1|	0.01	94	Schizosaccharomyces octosporus yFS286
P2357|Iso_4032|I|SPAC328.05	gi|891585347|ref|XP_013022624.1|	0.011	49	Schizosaccharomyces cryophilus OY26
P2357|Iso_4032|I|SPAC328.05	gi|891597521|ref|XP_013024953.1|	0.011	85	Schizosaccharomyces cryophilus OY26
P2357|Iso_4032|I|SPAC328.05	gi|891574137|ref|XP_013020228.1|	0.012	84	Schizosaccharomyces octosporus yFS286
P2357|Iso_4032|I|SPAC328.05	gi|213407206|ref|XP_002174374.1|	0.012	264	Schizosaccharomyces japonicus yFS275
P2357|Iso_4032|I|SPAC328.05	gi|891554062|ref|XP_013017569.1|	0.013	73	Schizosaccharomyces octosporus yFS286
P2357|Iso_4032|I|SPAC328.05	gi|891579954|ref|XP_013021826.1|	0.014	73	Schizosaccharomyces cryophilus OY26
P2357|Iso_4032|I|SPAC328.05	gi|891588796|ref|XP_013023278.1|	0.025	71	Schizosaccharomyces cryophilus OY26
P2357|Iso_4032|I|SPAC328.05	gi|891578733|ref|XP_013020753.1|	0.025	50	Schizosaccharomyces octosporus yFS286
P2357|Iso_4032|I|SPAC328.05	gi|891571675|ref|XP_013019981.1|	0.03	207	Schizosaccharomyces octosporus yFS286
P2357|Iso_4032|I|SPAC328.05	gi|891581816|ref|XP_013021955.1|	0.038	190	Schizosaccharomyces cryophilus OY26
P2357|Iso_4032|I|SPAC328.05	gi|213403366|ref|XP_002172455.1|	0.041	49	Schizosaccharomyces japonicus yFS275
P2357|Iso_4032|I|SPAC328.05	gi|891548053|ref|XP_013016650.1|	0.044	81	Schizosaccharomyces octosporus yFS286
P2381|Iso_4070|I|SPAC16E8.11c	gi|891585357|ref|XP_013022629.1|	0	493	Schizosaccharomyces cryophilus OY26
P2381|Iso_4070|I|SPAC16E8.11c	gi|891559821|ref|XP_013018306.1|	0	487	Schizosaccharomyces octosporus yFS286
P2381|Iso_4070|I|SPAC16E8.11c	gi|745750655|ref|XP_002171790.2|	0	489	Schizosaccharomyces japonicus yFS275
P2455|Iso_4208|I|SPAC1142.02c	gi|891559741|ref|XP_013018266.1|	5.5e-31	68	Schizosaccharomyces octosporus yFS286
P2455|Iso_4208|I|SPAC1142.02c	gi|891585439|ref|XP_013022670.1|	1.88e-27	57	Schizosaccharomyces cryophilus OY26
P2455|Iso_4208|I|SPAC1142.02c	gi|213403952|ref|XP_002172748.1|	7.19e-19	57	Schizosaccharomyces japonicus yFS275
P2457|Iso_4210|I|SPAC1142.02c	gi|891559741|ref|XP_013018266.1|	4.18e-31	68	Schizosaccharomyces octosporus yFS286
P2457|Iso_4210|I|SPAC1142.02c	gi|891585439|ref|XP_013022670.1|	1.66e-27	57	Schizosaccharomyces cryophilus OY26
P2457|Iso_4210|I|SPAC1142.02c	gi|213403952|ref|XP_002172748.1|	6.88e-19	57	Schizosaccharomyces japonicus yFS275
P2462|Iso_4218|I|SPAC8C9.04	gi|891585812|ref|XP_013022856.1|	0.042	34	Schizosaccharomyces cryophilus OY26
P2504|Iso_4282|I|SPAC15A10.10	gi|891585862|ref|XP_013022881.1|	6.48e-18	66	Schizosaccharomyces cryophilus OY26
P2504|Iso_4282|I|SPAC15A10.10	gi|891551004|ref|XP_013017097.1|	3.9e-17	62	Schizosaccharomyces octosporus yFS286
P2506|Iso_4286,Iso_4296|I|SPAC15A10.10	gi|891551004|ref|XP_013017097.1|	4.6e-39	144	Schizosaccharomyces octosporus yFS286
P2506|Iso_4286,Iso_4296|I|SPAC15A10.10	gi|891585862|ref|XP_013022881.1|	6.71e-39	148	Schizosaccharomyces cryophilus OY26
P2543|Iso_4356|I|SPAC15E1.09	gi|213409902|ref|XP_002175721.1|	0.000608	33	Schizosaccharomyces japonicus yFS275
P2543|Iso_4356|I|SPAC15E1.09	gi|891585888|ref|XP_013022894.1|	0.002	32	Schizosaccharomyces cryophilus OY26
P2543|Iso_4356|I|SPAC15E1.09	gi|891550978|ref|XP_013017084.1|	0.002	31	Schizosaccharomyces octosporus yFS286
P2843|Iso_4873|I|SPAC1F7.07c	gi|891592279|ref|XP_013023959.1|	3.04e-82	191	Schizosaccharomyces cryophilus OY26
P2843|Iso_4873|I|SPAC1F7.07c	gi|891549300|ref|XP_013016905.1|	3.37e-82	200	Schizosaccharomyces octosporus yFS286
P2843|Iso_4873|I|SPAC1F7.07c	gi|213409984|ref|XP_002175762.1|	2.06e-70	208	Schizosaccharomyces japonicus yFS275
P2914|Iso_4973|I|SPAC30.03c	gi|891588884|ref|XP_013023322.1|	8.55e-70	168	Schizosaccharomyces cryophilus OY26
P2914|Iso_4973|I|SPAC30.03c	gi|891575470|ref|XP_013020479.1|	1.65e-68	171	Schizosaccharomyces octosporus yFS286
P2914|Iso_4973|I|SPAC30.03c	gi|213403041|ref|XP_002172293.1|	1.09e-55	159	Schizosaccharomyces japonicus yFS275
P2915|Iso_4974,Iso_4989|I|SPAC30.03c	gi|891575470|ref|XP_013020479.1|	7.16e-17	79	Schizosaccharomyces octosporus yFS286
P2915|Iso_4974,Iso_4989|I|SPAC30.03c	gi|891588884|ref|XP_013023322.1|	1.04e-16	72	Schizosaccharomyces cryophilus OY26
P2915|Iso_4974,Iso_4989|I|SPAC30.03c	gi|213403041|ref|XP_002172293.1|	1.01e-08	61	Schizosaccharomyces japonicus yFS275
P2918|Iso_4978|I|SPAC30.03c	gi|891588884|ref|XP_013023322.1|	1.71e-32	107	Schizosaccharomyces cryophilus OY26
P2918|Iso_4978|I|SPAC30.03c	gi|891575470|ref|XP_013020479.1|	2.64e-30	110	Schizosaccharomyces octosporus yFS286
P2918|Iso_4978|I|SPAC30.03c	gi|213403041|ref|XP_002172293.1|	8.46e-23	93	Schizosaccharomyces japonicus yFS275
P2945|Iso_5030,Iso_5046,Iso_5050|I|SPAC16.01	gi|891575518|ref|XP_013020490.1|	3.2e-87	131	Schizosaccharomyces octosporus yFS286
P2945|Iso_5030,Iso_5046,Iso_5050|I|SPAC16.01	gi|891588862|ref|XP_013023311.1|	1.67e-86	130	Schizosaccharomyces cryophilus OY26
P2945|Iso_5030,Iso_5046,Iso_5050|I|SPAC16.01	gi|745750693|ref|XP_002171704.2|	6.58e-83	130	Schizosaccharomyces japonicus yFS275
P2945|Iso_5030,Iso_5046,Iso_5050|I|SPAC16.01	gi|891592287|ref|XP_013023963.1|	8.8e-41	112	Schizosaccharomyces cryophilus OY26
P2945|Iso_5030,Iso_5046,Iso_5050|I|SPAC16.01	gi|891549343|ref|XP_013016909.1|	9.58e-41	112	Schizosaccharomyces octosporus yFS286
P2945|Iso_5030,Iso_5046,Iso_5050|I|SPAC16.01	gi|213409968|ref|XP_002175754.1|	4.53e-40	112	Schizosaccharomyces japonicus yFS275
P2945|Iso_5030,Iso_5046,Iso_5050|I|SPAC16.01	gi|213406217|ref|XP_002173880.1|	8.96e-40	130	Schizosaccharomyces japonicus yFS275
P2945|Iso_5030,Iso_5046,Iso_5050|I|SPAC16.01	gi|891587163|ref|XP_013023131.1|	1.69e-37	125	Schizosaccharomyces cryophilus OY26
P2945|Iso_5030,Iso_5046,Iso_5050|I|SPAC16.01	gi|891577587|ref|XP_013020665.1|	6.03e-37	112	Schizosaccharomyces octosporus yFS286
P2945|Iso_5030,Iso_5046,Iso_5050|I|SPAC16.01	gi|213409668|ref|XP_002175604.1|	3.32e-32	129	Schizosaccharomyces japonicus yFS275
P2945|Iso_5030,Iso_5046,Iso_5050|I|SPAC16.01	gi|891585479|ref|XP_013022690.1|	1.66e-31	129	Schizosaccharomyces cryophilus OY26
P2945|Iso_5030,Iso_5046,Iso_5050|I|SPAC16.01	gi|891559705|ref|XP_013018248.1|	2.54e-31	129	Schizosaccharomyces octosporus yFS286
P2945|Iso_5030,Iso_5046,Iso_5050|I|SPAC16.01	gi|891579021|ref|XP_013021593.1|	1.28e-26	129	Schizosaccharomyces cryophilus OY26
P2945|Iso_5030,Iso_5046,Iso_5050|I|SPAC16.01	gi|891571962|ref|XP_013020063.1|	3.68e-26	129	Schizosaccharomyces octosporus yFS286
P2945|Iso_5030,Iso_5046,Iso_5050|I|SPAC16.01	gi|891543288|ref|XP_013016102.1|	4.08e-25	133	Schizosaccharomyces octosporus yFS286
P2945|Iso_5030,Iso_5046,Iso_5050|I|SPAC16.01	gi|891593200|ref|XP_013024300.1|	1.63e-24	133	Schizosaccharomyces cryophilus OY26
P2945|Iso_5030,Iso_5046,Iso_5050|I|SPAC16.01	gi|213405601|ref|XP_002173572.1|	1.14e-23	134	Schizosaccharomyces japonicus yFS275
P2945|Iso_5030,Iso_5046,Iso_5050|I|SPAC16.01	gi|745754166|ref|XP_002173014.2|	1.99e-23	112	Schizosaccharomyces japonicus yFS275
P2945|Iso_5030,Iso_5046,Iso_5050|I|SPAC16.01	gi|213401875|ref|XP_002171710.1|	0.004	146	Schizosaccharomyces japonicus yFS275
P2945|Iso_5030,Iso_5046,Iso_5050|I|SPAC16.01	gi|213407064|ref|XP_002174303.1|	0.006	125	Schizosaccharomyces japonicus yFS275
P2945|Iso_5030,Iso_5046,Iso_5050|I|SPAC16.01	gi|891572570|ref|XP_013020881.1|	0.006	125	Schizosaccharomyces cryophilus OY26
P2945|Iso_5030,Iso_5046,Iso_5050|I|SPAC16.01	gi|891557201|ref|XP_013018054.1|	0.011	125	Schizosaccharomyces octosporus yFS286
P2945|Iso_5030,Iso_5046,Iso_5050|I|SPAC16.01	gi|891578288|ref|XP_013021464.1|	0.024	106	Schizosaccharomyces cryophilus OY26
P2945|Iso_5030,Iso_5046,Iso_5050|I|SPAC16.01	gi|745750347|ref|XP_002173841.2|	0.027	64	Schizosaccharomyces japonicus yFS275
P2945|Iso_5030,Iso_5046,Iso_5050|I|SPAC16.01	gi|891554538|ref|XP_013017711.1|	0.029	106	Schizosaccharomyces octosporus yFS286
P2945|Iso_5030,Iso_5046,Iso_5050|I|SPAC16.01	gi|213403856|ref|XP_002172700.1|	0.038	73	Schizosaccharomyces japonicus yFS275
P2945|Iso_5030,Iso_5046,Iso_5050|I|SPAC16.01	gi|891565466|ref|XP_013018972.1|	0.038	73	Schizosaccharomyces octosporus yFS286;Schizosaccharomyces cryophilus OY26
P2958|Iso_5056,Iso_5064,Iso_5066,Iso_5077|I|SPAC16.02c	gi|891575522|ref|XP_013020491.1|	8.62e-13	200	Schizosaccharomyces octosporus yFS286
P2958|Iso_5056,Iso_5064,Iso_5066,Iso_5077|I|SPAC16.02c	gi|891588860|ref|XP_013023310.1|	3e-11	211	Schizosaccharomyces cryophilus OY26
P2958|Iso_5056,Iso_5064,Iso_5066,Iso_5077|I|SPAC16.02c	gi|745750691|ref|XP_002171705.2|	2.27e-05	229	Schizosaccharomyces japonicus yFS275
P2958|Iso_5056,Iso_5064,Iso_5066,Iso_5077|I|SPAC16.02c	gi|891579885|ref|XP_013021819.1|	0.004	137	Schizosaccharomyces cryophilus OY26
P2981|Iso_5108|I|SPAC17C9.16c	gi|891588826|ref|XP_013023293.1|	3.62e-63	121	Schizosaccharomyces cryophilus OY26
P2981|Iso_5108|I|SPAC17C9.16c	gi|891575598|ref|XP_013020507.1|	1.52e-59	122	Schizosaccharomyces octosporus yFS286
P2981|Iso_5108|I|SPAC17C9.16c	gi|891547931|ref|XP_013016589.1|	4.26e-56	127	Schizosaccharomyces octosporus yFS286
P2981|Iso_5108|I|SPAC17C9.16c	gi|891589514|ref|XP_013023633.1|	7.23e-56	127	Schizosaccharomyces cryophilus OY26
P2981|Iso_5108|I|SPAC17C9.16c	gi|891585938|ref|XP_013022919.1|	1.72e-24	128	Schizosaccharomyces cryophilus OY26
P2981|Iso_5108|I|SPAC17C9.16c	gi|891547879|ref|XP_013016563.1|	5.31e-24	120	Schizosaccharomyces octosporus yFS286
P2981|Iso_5108|I|SPAC17C9.16c	gi|891589512|ref|XP_013023632.1|	2.42e-23	127	Schizosaccharomyces cryophilus OY26
P2981|Iso_5108|I|SPAC17C9.16c	gi|891565520|ref|XP_013018999.1|	4.06e-23	122	Schizosaccharomyces octosporus yFS286
P2981|Iso_5108|I|SPAC17C9.16c	gi|891556730|ref|XP_013017835.1|	1.11e-22	125	Schizosaccharomyces octosporus yFS286
P2981|Iso_5108|I|SPAC17C9.16c	gi|891600835|ref|XP_013025527.1|	1.69e-22	126	Schizosaccharomyces cryophilus OY26
P2981|Iso_5108|I|SPAC17C9.16c	gi|891575774|ref|XP_013021306.1|	8.04e-22	125	Schizosaccharomyces cryophilus OY26
P2981|Iso_5108|I|SPAC17C9.16c	gi|891547929|ref|XP_013016588.1|	1.07e-21	127	Schizosaccharomyces octosporus yFS286
P2981|Iso_5108|I|SPAC17C9.16c	gi|745754254|ref|XP_002173278.2|	1.63e-21	120	Schizosaccharomyces japonicus yFS275
P2981|Iso_5108|I|SPAC17C9.16c	gi|213405193|ref|XP_002173368.1|	1.74e-21	126	Schizosaccharomyces japonicus yFS275
P2981|Iso_5108|I|SPAC17C9.16c	gi|891547877|ref|XP_013016562.1|	2.3e-21	127	Schizosaccharomyces octosporus yFS286
P2981|Iso_5108|I|SPAC17C9.16c	gi|891599439|ref|XP_013025378.1|	4.34e-21	126	Schizosaccharomyces cryophilus OY26
P2981|Iso_5108|I|SPAC17C9.16c	gi|891585912|ref|XP_013022906.1|	5.97e-21	122	Schizosaccharomyces cryophilus OY26
P2981|Iso_5108|I|SPAC17C9.16c	gi|213405010|ref|XP_002173277.1|	8.53e-21	127	Schizosaccharomyces japonicus yFS275
P2981|Iso_5108|I|SPAC17C9.16c	gi|891565711|ref|XP_013019094.1|	1.65e-20	126	Schizosaccharomyces octosporus yFS286
P2981|Iso_5108|I|SPAC17C9.16c	gi|891559940|ref|XP_013018365.1|	4.96e-20	124	Schizosaccharomyces octosporus yFS286
P2981|Iso_5108|I|SPAC17C9.16c	gi|891600833|ref|XP_013025526.1|	4.1e-19	119	Schizosaccharomyces cryophilus OY26
P2981|Iso_5108|I|SPAC17C9.16c	gi|891595754|ref|XP_013024621.1|	4.91e-19	115	Schizosaccharomyces cryophilus OY26
P2981|Iso_5108|I|SPAC17C9.16c	gi|891574611|ref|XP_013020259.1|	1.29e-18	127	Schizosaccharomyces octosporus yFS286
P2981|Iso_5108|I|SPAC17C9.16c	gi|891596952|ref|XP_013024921.1|	2.78e-18	127	Schizosaccharomyces cryophilus OY26
P2981|Iso_5108|I|SPAC17C9.16c	gi|891602492|ref|XP_013025811.1|	1.54e-14	126	Schizosaccharomyces cryophilus OY26
P2981|Iso_5108|I|SPAC17C9.16c	gi|745750223|ref|XP_002173551.2|	2.4e-14	126	Schizosaccharomyces japonicus yFS275
P2981|Iso_5108|I|SPAC17C9.16c	gi|891552244|ref|XP_013017401.1|	2.75e-14	126	Schizosaccharomyces octosporus yFS286
P2981|Iso_5108|I|SPAC17C9.16c	gi|891574863|ref|XP_013020323.1|	4.23e-13	80	Schizosaccharomyces octosporus yFS286
P2981|Iso_5108|I|SPAC17C9.16c	gi|891585934|ref|XP_013022917.1|	5.22e-12	86	Schizosaccharomyces cryophilus OY26
P2981|Iso_5108|I|SPAC17C9.16c	gi|891556120|ref|XP_013017815.1|	5.94e-11	123	Schizosaccharomyces octosporus yFS286
P2981|Iso_5108|I|SPAC17C9.16c	gi|213406950|ref|XP_002174246.1|	6.26e-11	114	Schizosaccharomyces japonicus yFS275
P2981|Iso_5108|I|SPAC17C9.16c	gi|213408355|ref|XP_002174948.1|	1.48e-10	101	Schizosaccharomyces japonicus yFS275
P2981|Iso_5108|I|SPAC17C9.16c	gi|213405187|ref|XP_002173365.1|	2.96e-10	121	Schizosaccharomyces japonicus yFS275
P2981|Iso_5108|I|SPAC17C9.16c	gi|745752640|ref|XP_002174939.2|	1.51e-09	119	Schizosaccharomyces japonicus yFS275
P2981|Iso_5108|I|SPAC17C9.16c	gi|891548350|ref|XP_013016798.1|	1.73e-09	123	Schizosaccharomyces octosporus yFS286
P2981|Iso_5108|I|SPAC17C9.16c	gi|891576208|ref|XP_013021352.1|	1.76e-09	123	Schizosaccharomyces cryophilus OY26
P2981|Iso_5108|I|SPAC17C9.16c	gi|891599445|ref|XP_013025381.1|	2.2e-09	101	Schizosaccharomyces cryophilus OY26
P2981|Iso_5108|I|SPAC17C9.16c	gi|891592057|ref|XP_013023848.1|	3.16e-09	122	Schizosaccharomyces cryophilus OY26
P2981|Iso_5108|I|SPAC17C9.16c	gi|891565707|ref|XP_013019092.1|	7.32e-09	101	Schizosaccharomyces octosporus yFS286
P2981|Iso_5108|I|SPAC17C9.16c	gi|891574655|ref|XP_013020272.1|	5.74e-08	111	Schizosaccharomyces octosporus yFS286
P2981|Iso_5108|I|SPAC17C9.16c	gi|891582454|ref|XP_013022208.1|	9.23e-08	120	Schizosaccharomyces cryophilus OY26
P2981|Iso_5108|I|SPAC17C9.16c	gi|213406732|ref|XP_002174137.1|	1.07e-07	118	Schizosaccharomyces japonicus yFS275
P2981|Iso_5108|I|SPAC17C9.16c	gi|213408036|ref|XP_002174789.1|	1.43e-05	124	Schizosaccharomyces japonicus yFS275
P2981|Iso_5108|I|SPAC17C9.16c	gi|891585383|ref|XP_013022642.1|	8.77e-05	121	Schizosaccharomyces cryophilus OY26
P2981|Iso_5108|I|SPAC17C9.16c	gi|891559797|ref|XP_013018294.1|	0.006	59	Schizosaccharomyces octosporus yFS286
P3079|Iso_5298|I|SPAC12B10.08c	gi|213404712|ref|XP_002173128.1|	2.07e-74	422	Schizosaccharomyces japonicus yFS275
P3079|Iso_5298|I|SPAC12B10.08c	gi|891586135|ref|XP_013023010.1|	1.97e-10	136	Schizosaccharomyces cryophilus OY26
P3079|Iso_5298|I|SPAC12B10.08c	gi|891578853|ref|XP_013020785.1|	2.7e-10	136	Schizosaccharomyces octosporus yFS286
P3079|Iso_5298|I|SPAC12B10.08c	gi|213408567|ref|XP_002175054.1|	2.2e-09	136	Schizosaccharomyces japonicus yFS275
P3117|Iso_5369|I|SPAC144.02	gi|213401147|ref|XP_002171346.1|	3.93e-109	185	Schizosaccharomyces japonicus yFS275
P3117|Iso_5369|I|SPAC144.02	gi|891562854|ref|XP_013018738.1|	4.67e-107	186	Schizosaccharomyces octosporus yFS286
P3117|Iso_5369|I|SPAC144.02	gi|891596434|ref|XP_013024891.1|	8.49e-106	186	Schizosaccharomyces cryophilus OY26
P3117|Iso_5369|I|SPAC144.02	gi|213408529|ref|XP_002175035.1|	5.61e-09	46	Schizosaccharomyces japonicus yFS275
P3117|Iso_5369|I|SPAC144.02	gi|891551377|ref|XP_013017283.1|	2.06e-08	34	Schizosaccharomyces octosporus yFS286
P3117|Iso_5369|I|SPAC144.02	gi|891574839|ref|XP_013021070.1|	1.04e-07	31	Schizosaccharomyces cryophilus OY26
P3117|Iso_5369|I|SPAC144.02	gi|891596108|ref|XP_013024798.1|	3.04e-07	57	Schizosaccharomyces cryophilus OY26
P3117|Iso_5369|I|SPAC144.02	gi|891585750|ref|XP_013022825.1|	9.43e-07	33	Schizosaccharomyces cryophilus OY26
P3117|Iso_5369|I|SPAC144.02	gi|891602090|ref|XP_013025612.1|	1.89e-06	61	Schizosaccharomyces cryophilus OY26
P3117|Iso_5369|I|SPAC144.02	gi|891563032|ref|XP_013018827.1|	1.97e-06	64	Schizosaccharomyces octosporus yFS286
P3117|Iso_5369|I|SPAC144.02	gi|745752218|ref|XP_002174619.2|	3.11e-06	33	Schizosaccharomyces japonicus yFS275
P3117|Iso_5369|I|SPAC144.02	gi|891551119|ref|XP_013017154.1|	3.29e-06	63	Schizosaccharomyces octosporus yFS286
P3117|Iso_5369|I|SPAC144.02	gi|891547028|ref|XP_013016478.1|	1.06e-05	66	Schizosaccharomyces octosporus yFS286
P3117|Iso_5369|I|SPAC144.02	gi|213401375|ref|XP_002171460.1|	2.28e-05	61	Schizosaccharomyces japonicus yFS275
P3117|Iso_5369|I|SPAC144.02	gi|745750815|ref|XP_002171365.2|	3.61e-05	60	Schizosaccharomyces japonicus yFS275
P3117|Iso_5369|I|SPAC144.02	gi|891545129|ref|XP_013016214.1|	5.82e-05	42	Schizosaccharomyces octosporus yFS286
P3117|Iso_5369|I|SPAC144.02	gi|891592746|ref|XP_013024187.1|	6.38e-05	42	Schizosaccharomyces cryophilus OY26
P3117|Iso_5369|I|SPAC144.02	gi|213405385|ref|XP_002173464.1|	0.001	31	Schizosaccharomyces japonicus yFS275
P3117|Iso_5369|I|SPAC144.02	gi|891549528|ref|XP_013016920.1|	0.006	42	Schizosaccharomyces octosporus yFS286
P3117|Iso_5369|I|SPAC144.02	gi|891592309|ref|XP_013023974.1|	0.007	42	Schizosaccharomyces cryophilus OY26
P3117|Iso_5369|I|SPAC144.02	gi|891579294|ref|XP_013021683.1|	0.01	62	Schizosaccharomyces cryophilus OY26
P3117|Iso_5369|I|SPAC144.02	gi|213409812|ref|XP_002175676.1|	0.011	40	Schizosaccharomyces japonicus yFS275
P3117|Iso_5369|I|SPAC144.02	gi|745752186|ref|XP_002174538.2|	0.02	45	Schizosaccharomyces japonicus yFS275
P3117|Iso_5369|I|SPAC144.02	gi|891589341|ref|XP_013023550.1|	0.04	61	Schizosaccharomyces cryophilus OY26
P3117|Iso_5369|I|SPAC144.02	gi|891568590|ref|XP_013019478.1|	0.049	34	Schizosaccharomyces octosporus yFS286
P3179|Iso_5467|I|SPAC458.06	gi|891596134|ref|XP_013024811.1|	1.31e-166	340	Schizosaccharomyces cryophilus OY26
P3179|Iso_5467|I|SPAC458.06	gi|891563008|ref|XP_013018815.1|	6.08e-164	339	Schizosaccharomyces octosporus yFS286
P3179|Iso_5467|I|SPAC458.06	gi|213401281|ref|XP_002171413.1|	2.29e-87	327	Schizosaccharomyces japonicus yFS275
P3179|Iso_5467|I|SPAC458.06	gi|213410521|ref|XP_002176030.1|	2.75e-21	214	Schizosaccharomyces japonicus yFS275
P3179|Iso_5467|I|SPAC458.06	gi|891579062|ref|XP_013021603.1|	2.3e-19	272	Schizosaccharomyces cryophilus OY26
P3179|Iso_5467|I|SPAC458.06	gi|891562623|ref|XP_013018623.1|	6.16e-18	232	Schizosaccharomyces octosporus yFS286
P3179|Iso_5467|I|SPAC458.06	gi|891571887|ref|XP_013020053.1|	4.3e-16	249	Schizosaccharomyces octosporus yFS286
P3179|Iso_5467|I|SPAC458.06	gi|891582650|ref|XP_013022306.1|	1.36e-15	229	Schizosaccharomyces cryophilus OY26
P3179|Iso_5467|I|SPAC458.06	gi|745754170|ref|XP_002173023.2|	2.36e-15	243	Schizosaccharomyces japonicus yFS275
P3179|Iso_5467|I|SPAC458.06	gi|891573298|ref|XP_013020933.1|	7.55e-06	80	Schizosaccharomyces cryophilus OY26
P3179|Iso_5467|I|SPAC458.06	gi|891557536|ref|XP_013018106.1|	1.5e-05	77	Schizosaccharomyces octosporus yFS286
P3179|Iso_5467|I|SPAC458.06	gi|213410445|ref|XP_002175992.1|	0.000439	85	Schizosaccharomyces japonicus;Schizosaccharomyces japonicus yFS275
P3179|Iso_5467|I|SPAC458.06	gi|213401611|ref|XP_002171578.1|	0.000736	168	Schizosaccharomyces japonicus;Schizosaccharomyces japonicus yFS275
P3179|Iso_5467|I|SPAC458.06	gi|213407004|ref|XP_002174273.1|	0.001	149	Schizosaccharomyces japonicus yFS275
P3179|Iso_5467|I|SPAC458.06	gi|213403270|ref|XP_002172407.1|	0.006	92	Schizosaccharomyces japonicus yFS275
P3179|Iso_5467|I|SPAC458.06	gi|891571645|ref|XP_013019966.1|	0.01	83	Schizosaccharomyces octosporus;Schizosaccharomyces octosporus yFS286
P3179|Iso_5467|I|SPAC458.06	gi|213403314|ref|XP_002172429.1|	0.012	103	Schizosaccharomyces japonicus yFS275
P3179|Iso_5467|I|SPAC458.06	gi|891581947|ref|XP_013021969.1|	0.012	83	Schizosaccharomyces cryophilus OY26
P3179|Iso_5467|I|SPAC458.06	gi|745750227|ref|XP_002173559.2|	0.016	222	Schizosaccharomyces japonicus yFS275
P3179|Iso_5467|I|SPAC458.06	gi|891560070|ref|XP_013018411.1|	0.02	103	Schizosaccharomyces octosporus yFS286
P3179|Iso_5467|I|SPAC458.06	gi|891584853|ref|XP_013022526.1|	0.03	104	Schizosaccharomyces cryophilus OY26
P3179|Iso_5467|I|SPAC458.06	gi|213409263|ref|XP_002175402.1|	0.048	93	Schizosaccharomyces japonicus yFS275
P3182|Iso_5472,Iso_5473|I|SPAC458.06	gi|213401281|ref|XP_002171413.1|	3.65e-13	50	Schizosaccharomyces japonicus yFS275
P3182|Iso_5472,Iso_5473|I|SPAC458.06	gi|891596134|ref|XP_013024811.1|	3.06e-12	46	Schizosaccharomyces cryophilus OY26
P3182|Iso_5472,Iso_5473|I|SPAC458.06	gi|891563008|ref|XP_013018815.1|	2.63e-11	46	Schizosaccharomyces octosporus yFS286
P3189|Iso_5480|I|SPAC458.07	gi|891596136|ref|XP_013024812.1|	7.14e-163	397	Schizosaccharomyces cryophilus OY26
P3189|Iso_5480|I|SPAC458.07	gi|891563006|ref|XP_013018814.1|	3.75e-155	354	Schizosaccharomyces octosporus yFS286
P3189|Iso_5480|I|SPAC458.07	gi|213401283|ref|XP_002171414.1|	1.04e-130	369	Schizosaccharomyces japonicus yFS275
P3252|Iso_5580,Iso_5582,Iso_5586|I|SPAC22F8.07c	gi|891596190|ref|XP_013024839.1|	2.6e-10	87	Schizosaccharomyces cryophilus OY26
P3252|Iso_5580,Iso_5582,Iso_5586|I|SPAC22F8.07c	gi|213401197|ref|XP_002171371.1|	1.3e-08	82	Schizosaccharomyces japonicus yFS275
P3252|Iso_5580,Iso_5582,Iso_5586|I|SPAC22F8.07c	gi|891562952|ref|XP_013018787.1|	4.12e-08	57	Schizosaccharomyces octosporus yFS286
P3253|Iso_5583|I|SPAC22F8.07c	gi|891596190|ref|XP_013024839.1|	3.12e-74	270	Schizosaccharomyces cryophilus OY26
P3253|Iso_5583|I|SPAC22F8.07c	gi|213401197|ref|XP_002171371.1|	1.52e-65	260	Schizosaccharomyces japonicus yFS275
P3253|Iso_5583|I|SPAC22F8.07c	gi|891562952|ref|XP_013018787.1|	9.93e-65	236	Schizosaccharomyces octosporus yFS286
P3253|Iso_5583|I|SPAC22F8.07c	gi|213410319|ref|XP_002175929.1|	3.09e-39	222	Schizosaccharomyces japonicus yFS275
P3253|Iso_5583|I|SPAC22F8.07c	gi|891602076|ref|XP_013025605.1|	2.4e-38	223	Schizosaccharomyces cryophilus OY26
P3253|Iso_5583|I|SPAC22F8.07c	gi|891547183|ref|XP_013016485.1|	9.52e-38	223	Schizosaccharomyces octosporus yFS286
P3253|Iso_5583|I|SPAC22F8.07c	gi|745750439|ref|XP_002174106.2|	2.92e-17	273	Schizosaccharomyces japonicus yFS275
P3253|Iso_5583|I|SPAC22F8.07c	gi|891579033|ref|XP_013021596.1|	0.000311	117	Schizosaccharomyces cryophilus OY26
P3253|Iso_5583|I|SPAC22F8.07c	gi|891572312|ref|XP_013020096.1|	0.004	81	Schizosaccharomyces octosporus yFS286
P3253|Iso_5583|I|SPAC22F8.07c	gi|891571938|ref|XP_013020060.1|	0.004	62	Schizosaccharomyces octosporus yFS286
P3253|Iso_5583|I|SPAC22F8.07c	gi|745753994|ref|XP_002172656.2|	0.022	113	Schizosaccharomyces japonicus yFS275
P3253|Iso_5583|I|SPAC22F8.07c	gi|891561008|ref|XP_013018510.1|	0.046	109	Schizosaccharomyces octosporus yFS286
P3255|Iso_5589|I|SPAC22F8.07c	gi|891596190|ref|XP_013024839.1|	4.52e-13	75	Schizosaccharomyces cryophilus OY26
P3255|Iso_5589|I|SPAC22F8.07c	gi|891602076|ref|XP_013025605.1|	9.5e-13	76	Schizosaccharomyces cryophilus OY26
P3255|Iso_5589|I|SPAC22F8.07c	gi|213410319|ref|XP_002175929.1|	1.13e-12	70	Schizosaccharomyces japonicus yFS275
P3255|Iso_5589|I|SPAC22F8.07c	gi|213401197|ref|XP_002171371.1|	2.29e-12	67	Schizosaccharomyces japonicus yFS275
P3255|Iso_5589|I|SPAC22F8.07c	gi|891547183|ref|XP_013016485.1|	3.18e-12	76	Schizosaccharomyces octosporus yFS286
P3255|Iso_5589|I|SPAC22F8.07c	gi|891562952|ref|XP_013018787.1|	3.56e-11	71	Schizosaccharomyces octosporus yFS286
P3255|Iso_5589|I|SPAC22F8.07c	gi|745750439|ref|XP_002174106.2|	0.009	84	Schizosaccharomyces japonicus yFS275
P3347|Iso_5736|I|SPAC19B12.12c	gi|891592790|ref|XP_013024209.1|	2.44e-58	180	Schizosaccharomyces cryophilus OY26
P3347|Iso_5736|I|SPAC19B12.12c	gi|891545087|ref|XP_013016193.1|	3.18e-55	194	Schizosaccharomyces octosporus yFS286
P3347|Iso_5736|I|SPAC19B12.12c	gi|213407412|ref|XP_002174477.1|	1.45e-24	181	Schizosaccharomyces japonicus yFS275
P3412|Iso_5851|I|SPAC1952.16	gi|891560325|ref|XP_013018465.1|	4.9e-113	333	Schizosaccharomyces octosporus yFS286
P3412|Iso_5851|I|SPAC1952.16	gi|891584044|ref|XP_013022473.1|	4.61e-110	333	Schizosaccharomyces cryophilus OY26
P3412|Iso_5851|I|SPAC1952.16	gi|891542422|ref|XP_013015905.1|	1.7e-12	336	Schizosaccharomyces octosporus yFS286
P3412|Iso_5851|I|SPAC1952.16	gi|745752310|ref|XP_002174881.2|	2.26e-11	306	Schizosaccharomyces japonicus yFS275
P3412|Iso_5851|I|SPAC1952.16	gi|891579501|ref|XP_013021771.1|	1.16e-10	303	Schizosaccharomyces cryophilus OY26
P3600|Iso_6143|I|SPAP8A3.09c	gi|891554835|ref|XP_013017738.1|	0	571	Schizosaccharomyces octosporus yFS286
P3600|Iso_6143|I|SPAP8A3.09c	gi|891577682|ref|XP_013021437.1|	0	569	Schizosaccharomyces cryophilus OY26
P3600|Iso_6143|I|SPAP8A3.09c	gi|213401499|ref|XP_002171522.1|	0	567	Schizosaccharomyces japonicus yFS275
P3600|Iso_6143|I|SPAP8A3.09c	gi|891554182|ref|XP_013017629.1|	2.12e-06	264	Schizosaccharomyces octosporus yFS286
P3600|Iso_6143|I|SPAP8A3.09c	gi|891575388|ref|XP_013020459.1|	2.94e-06	264	Schizosaccharomyces octosporus yFS286
P3600|Iso_6143|I|SPAP8A3.09c	gi|891588922|ref|XP_013023341.1|	4.25e-06	264	Schizosaccharomyces cryophilus OY26
P3600|Iso_6143|I|SPAP8A3.09c	gi|213403009|ref|XP_002172277.1|	1.33e-05	264	Schizosaccharomyces japonicus yFS275
P3600|Iso_6143|I|SPAP8A3.09c	gi|891600156|ref|XP_013025484.1|	3.2e-05	264	Schizosaccharomyces cryophilus OY26
P3600|Iso_6143|I|SPAP8A3.09c	gi|213409750|ref|XP_002175645.1|	0.000144	239	Schizosaccharomyces japonicus yFS275
P3600|Iso_6143|I|SPAP8A3.09c	gi|387766290|pdb|4DB9|A	0.004	111	Schizosaccharomyces japonicus yFS275
P3600|Iso_6143|I|SPAP8A3.09c	gi|745754242|ref|XP_002173247.2|	0.008	122	Schizosaccharomyces japonicus yFS275
P3600|Iso_6143|I|SPAP8A3.09c	gi|891550998|ref|XP_013017094.1|	0.016	163	Schizosaccharomyces octosporus yFS286
P3600|Iso_6143|I|SPAP8A3.09c	gi|891587735|ref|XP_013023171.1|	0.031	119	Schizosaccharomyces cryophilus OY26
P3600|Iso_6143|I|SPAP8A3.09c	gi|891576818|ref|XP_013020628.1|	0.038	119	Schizosaccharomyces octosporus yFS286
P3600|Iso_6143|I|SPAP8A3.09c	gi|891585868|ref|XP_013022884.1|	0.045	194	Schizosaccharomyces cryophilus OY26
P3649|Iso_6222|I|SPAC3G6.05	gi|891577218|ref|XP_013021412.1|	7.06e-24	58	Schizosaccharomyces cryophilus OY26
P3649|Iso_6222|I|SPAC3G6.05	gi|891555197|ref|XP_013017763.1|	4.41e-22	57	Schizosaccharomyces octosporus yFS286
P3649|Iso_6222|I|SPAC3G6.05	gi|745754114|ref|XP_002172899.2|	3.82e-19	58	Schizosaccharomyces japonicus yFS275
P3649|Iso_6222|I|SPAC3G6.05	gi|213402265|ref|XP_002171905.1|	1.01e-11	43	Schizosaccharomyces japonicus yFS275
P3649|Iso_6222|I|SPAC3G6.05	gi|891588279|ref|XP_013023198.1|	1.44e-08	46	Schizosaccharomyces cryophilus OY26
P3649|Iso_6222|I|SPAC3G6.05	gi|891576395|ref|XP_013020601.1|	0.001	38	Schizosaccharomyces octosporus yFS286
P3761|Iso_6434|II|SPBC800.02	gi|891602044|ref|XP_013025589.1|	1.6e-39	211	Schizosaccharomyces cryophilus OY26
P3761|Iso_6434|II|SPBC800.02	gi|891547459|ref|XP_013016501.1|	3.58e-36	211	Schizosaccharomyces octosporus yFS286
P3761|Iso_6434|II|SPBC800.02	gi|213408405|ref|XP_002174973.1|	3.26e-06	33	Schizosaccharomyces japonicus yFS275
P3785|Iso_6465|II|SPBC1773.09c	gi|213405909|ref|XP_002173726.1|	1.06e-10	129	Schizosaccharomyces japonicus yFS275
P3795|Iso_6479,Iso_6481,Iso_6488,Iso_6489,Iso_6501,Iso_6504,Iso_6513|II|SPBC1271.12	gi|891555609|ref|XP_013017786.1|	0	326	Schizosaccharomyces octosporus yFS286
P3795|Iso_6479,Iso_6481,Iso_6488,Iso_6489,Iso_6501,Iso_6504,Iso_6513|II|SPBC1271.12	gi|891576816|ref|XP_013021391.1|	0	326	Schizosaccharomyces cryophilus OY26
P3795|Iso_6479,Iso_6481,Iso_6488,Iso_6489,Iso_6501,Iso_6504,Iso_6513|II|SPBC1271.12	gi|745754082|ref|XP_002172841.2|	8.93e-157	327	Schizosaccharomyces japonicus yFS275
P3795|Iso_6479,Iso_6481,Iso_6488,Iso_6489,Iso_6501,Iso_6504,Iso_6513|II|SPBC1271.12	gi|891598421|ref|XP_013025016.1|	1.94e-97	326	Schizosaccharomyces cryophilus OY26
P3795|Iso_6479,Iso_6481,Iso_6488,Iso_6489,Iso_6501,Iso_6504,Iso_6513|II|SPBC1271.12	gi|745750219|ref|XP_002173532.2|	1.57e-96	325	Schizosaccharomyces japonicus yFS275
P3795|Iso_6479,Iso_6481,Iso_6488,Iso_6489,Iso_6501,Iso_6504,Iso_6513|II|SPBC1271.12	gi|891573179|ref|XP_013020164.1|	2.86e-95	326	Schizosaccharomyces octosporus yFS286
P3795|Iso_6479,Iso_6481,Iso_6488,Iso_6489,Iso_6501,Iso_6504,Iso_6513|II|SPBC1271.12	gi|745752302|ref|XP_002174853.2|	7.68e-38	302	Schizosaccharomyces japonicus yFS275
P3795|Iso_6479,Iso_6481,Iso_6488,Iso_6489,Iso_6501,Iso_6504,Iso_6513|II|SPBC1271.12	gi|891595439|ref|XP_013024466.1|	4.94e-36	316	Schizosaccharomyces cryophilus OY26
P3795|Iso_6479,Iso_6481,Iso_6488,Iso_6489,Iso_6501,Iso_6504,Iso_6513|II|SPBC1271.12	gi|891569396|ref|XP_013019606.1|	5.52e-35	316	Schizosaccharomyces octosporus yFS286
P3795|Iso_6479,Iso_6481,Iso_6488,Iso_6489,Iso_6501,Iso_6504,Iso_6513|II|SPBC1271.12	gi|213405619|ref|XP_002173581.1|	8.16e-21	249	Schizosaccharomyces japonicus yFS275
P3795|Iso_6479,Iso_6481,Iso_6488,Iso_6489,Iso_6501,Iso_6504,Iso_6513|II|SPBC1271.12	gi|891553907|ref|XP_013017492.1|	1.99e-13	263	Schizosaccharomyces octosporus yFS286
P3795|Iso_6479,Iso_6481,Iso_6488,Iso_6489,Iso_6501,Iso_6504,Iso_6513|II|SPBC1271.12	gi|213404392|ref|XP_002172968.1|	1.28e-11	281	Schizosaccharomyces japonicus yFS275
P3795|Iso_6479,Iso_6481,Iso_6488,Iso_6489,Iso_6501,Iso_6504,Iso_6513|II|SPBC1271.12	gi|891580743|ref|XP_013021903.1|	1.27e-10	241	Schizosaccharomyces cryophilus OY26
P3795|Iso_6479,Iso_6481,Iso_6488,Iso_6489,Iso_6501,Iso_6504,Iso_6513|II|SPBC1271.12	gi|891585764|ref|XP_013022832.1|	5.49e-09	312	Schizosaccharomyces cryophilus OY26
P3795|Iso_6479,Iso_6481,Iso_6488,Iso_6489,Iso_6501,Iso_6504,Iso_6513|II|SPBC1271.12	gi|891551105|ref|XP_013017147.1|	2.29e-05	286	Schizosaccharomyces octosporus yFS286
P3795|Iso_6479,Iso_6481,Iso_6488,Iso_6489,Iso_6501,Iso_6504,Iso_6513|II|SPBC1271.12	gi|891545380|ref|XP_013016339.1|	3.68e-05	297	Schizosaccharomyces octosporus yFS286
P3795|Iso_6479,Iso_6481,Iso_6488,Iso_6489,Iso_6501,Iso_6504,Iso_6513|II|SPBC1271.12	gi|213401737|ref|XP_002171641.1|	0.027	303	Schizosaccharomyces japonicus yFS275
P3903|Iso_6695|II|SPBC428.13c	gi|891548031|ref|XP_013016639.1|	3.15e-05	30	Schizosaccharomyces octosporus yFS286
P3903|Iso_6695|II|SPBC428.13c	gi|891589720|ref|XP_013023682.1|	6.05e-05	30	Schizosaccharomyces cryophilus OY26
P3903|Iso_6695|II|SPBC428.13c	gi|213408575|ref|XP_002175058.1|	0.007	30	Schizosaccharomyces japonicus yFS275
P3906|Iso_6698|II|SPBC428.16c	gi|891548037|ref|XP_013016642.1|	1.45e-51	83	Schizosaccharomyces octosporus yFS286
P3906|Iso_6698|II|SPBC428.16c	gi|891589779|ref|XP_013023685.1|	7.84e-51	83	Schizosaccharomyces cryophilus OY26
P3906|Iso_6698|II|SPBC428.16c	gi|213406079|ref|XP_002173811.1|	1.98e-47	83	Schizosaccharomyces japonicus yFS275
P3906|Iso_6698|II|SPBC428.16c	gi|213407658|ref|XP_002174600.1|	5.62e-13	86	Schizosaccharomyces japonicus yFS275
P3906|Iso_6698|II|SPBC428.16c	gi|891578581|ref|XP_013020715.1|	6.29e-12	69	Schizosaccharomyces octosporus yFS286
P3906|Iso_6698|II|SPBC428.16c	gi|891586531|ref|XP_013023081.1|	3.96e-11	69	Schizosaccharomyces cryophilus OY26
P3906|Iso_6698|II|SPBC428.16c	gi|891575552|ref|XP_013020499.1|	2.16e-10	62	Schizosaccharomyces octosporus yFS286
P3906|Iso_6698|II|SPBC428.16c	gi|213401875|ref|XP_002171710.1|	7.29e-10	63	Schizosaccharomyces japonicus yFS275
P3906|Iso_6698|II|SPBC428.16c	gi|891588844|ref|XP_013023302.1|	9.7e-10	62	Schizosaccharomyces cryophilus OY26
P3906|Iso_6698|II|SPBC428.16c	gi|891587731|ref|XP_013023169.1|	4.57e-08	56	Schizosaccharomyces cryophilus OY26
P3906|Iso_6698|II|SPBC428.16c	gi|891576902|ref|XP_013020630.1|	4.71e-08	56	Schizosaccharomyces octosporus yFS286
P3906|Iso_6698|II|SPBC428.16c	gi|213408535|ref|XP_002175038.1|	4.96e-08	56	Schizosaccharomyces japonicus yFS275
P3906|Iso_6698|II|SPBC428.16c	gi|891592848|ref|XP_013024238.1|	1.45e-07	52	Schizosaccharomyces cryophilus OY26
P3906|Iso_6698|II|SPBC428.16c	gi|891544693|ref|XP_013016164.1|	8.94e-07	66	Schizosaccharomyces octosporus yFS286
P3906|Iso_6698|II|SPBC428.16c	gi|745752322|ref|XP_002176098.2|	1.53e-05	55	Schizosaccharomyces japonicus yFS275
P3906|Iso_6698|II|SPBC428.16c	gi|745753980|ref|XP_002172629.2|	0.001	81	Schizosaccharomyces japonicus yFS275
P3906|Iso_6698|II|SPBC428.16c	gi|891558529|ref|XP_013018165.1|	0.001	66	Schizosaccharomyces octosporus yFS286
P3906|Iso_6698|II|SPBC428.16c	gi|891574090|ref|XP_013020982.1|	0.001	61	Schizosaccharomyces cryophilus OY26
P3906|Iso_6698|II|SPBC428.16c	gi|891554538|ref|XP_013017711.1|	0.003	61	Schizosaccharomyces octosporus yFS286
P3906|Iso_6698|II|SPBC428.16c	gi|213409968|ref|XP_002175754.1|	0.028	108	Schizosaccharomyces japonicus yFS275
P3906|Iso_6698|II|SPBC428.16c	gi|891578288|ref|XP_013021464.1|	0.034	61	Schizosaccharomyces cryophilus OY26
P3974|Iso_6807,Iso_6812|II|SPBC354.07c	gi|891598421|ref|XP_013025016.1|	5.96e-08	30	Schizosaccharomyces cryophilus OY26
P3974|Iso_6807,Iso_6812|II|SPBC354.07c	gi|891573179|ref|XP_013020164.1|	1.14e-07	30	Schizosaccharomyces octosporus yFS286
P3995|Iso_6848|II|SPBC839.11c	gi|891598756|ref|XP_013025041.1|	1.29e-65	137	Schizosaccharomyces cryophilus OY26
P3995|Iso_6848|II|SPBC839.11c	gi|891554240|ref|XP_013017658.1|	5.05e-61	137	Schizosaccharomyces octosporus yFS286
P3995|Iso_6848|II|SPBC839.11c	gi|213409019|ref|XP_002175280.1|	3.96e-57	124	Schizosaccharomyces japonicus yFS275
P4115|Iso_7038|II|SPBC36.04	gi|891553973|ref|XP_013017525.1|	4.51e-40	72	Schizosaccharomyces octosporus yFS286
P4115|Iso_7038|II|SPBC36.04	gi|891580459|ref|XP_013021870.1|	9.86e-40	72	Schizosaccharomyces cryophilus OY26
P4115|Iso_7038|II|SPBC36.04	gi|213402173|ref|XP_002171859.1|	2.03e-23	71	Schizosaccharomyces japonicus yFS275
P4115|Iso_7038|II|SPBC36.04	gi|213404690|ref|XP_002173117.1|	2.43e-15	55	Schizosaccharomyces japonicus yFS275
P4115|Iso_7038|II|SPBC36.04	gi|891595683|ref|XP_013024588.1|	1.27e-13	56	Schizosaccharomyces cryophilus OY26
P4115|Iso_7038|II|SPBC36.04	gi|891545256|ref|XP_013016277.1|	2.83e-13	56	Schizosaccharomyces octosporus yFS286
P4131|Iso_7067|II|SPBC36.08c	gi|891580467|ref|XP_013021874.1|	1.81e-19	88	Schizosaccharomyces cryophilus OY26
P4131|Iso_7067|II|SPBC36.08c	gi|891553965|ref|XP_013017521.1|	2.14e-17	85	Schizosaccharomyces octosporus yFS286
P4131|Iso_7067|II|SPBC36.08c	gi|213402165|ref|XP_002171855.1|	0.002	91	Schizosaccharomyces japonicus yFS275
P4193|Iso_7155,Iso_7156|II|SPBP35G2.04c	gi|891580986|ref|XP_013021916.1|	4.29e-19	163	Schizosaccharomyces cryophilus OY26
P4193|Iso_7155,Iso_7156|II|SPBP35G2.04c	gi|891553667|ref|XP_013017479.1|	1.28e-18	162	Schizosaccharomyces octosporus yFS286
P4196|Iso_7160,Iso_7166|II|SPBP35G2.04c	gi|891580986|ref|XP_013021916.1|	1.21e-05	83	Schizosaccharomyces cryophilus OY26
P4196|Iso_7160,Iso_7166|II|SPBP35G2.04c	gi|891553667|ref|XP_013017479.1|	0.000131	83	Schizosaccharomyces octosporus yFS286
P4243|Iso_7238|II|SPBC337.08c	gi|213401917|ref|XP_002171731.1|	1.66e-169	243	Schizosaccharomyces japonicus yFS275
P4243|Iso_7238|II|SPBC337.08c	gi|891553225|ref|XP_013017449.1|	2.6e-161	230	Schizosaccharomyces octosporus yFS286
P4243|Iso_7238|II|SPBC337.08c	gi|891602899|ref|XP_013026014.1|	5.88e-77	153	Schizosaccharomyces cryophilus OY26
P4243|Iso_7238|II|SPBC337.08c	gi|213403686|ref|XP_002172615.1|	1.07e-47	78	Schizosaccharomyces japonicus yFS275
P4243|Iso_7238|II|SPBC337.08c	gi|891550810|ref|XP_013017000.1|	1.17e-47	78	Schizosaccharomyces octosporus yFS286;Schizosaccharomyces cryophilus OY26
P4243|Iso_7238|II|SPBC337.08c	gi|213403416|ref|XP_002172480.1|	3.91e-47	78	Schizosaccharomyces japonicus yFS275
P4243|Iso_7238|II|SPBC337.08c	gi|213405387|ref|XP_002173465.1|	8.73e-47	78	Schizosaccharomyces japonicus yFS275
P4243|Iso_7238|II|SPBC337.08c	gi|891568592|ref|XP_013019479.1|	9.82e-47	76	Schizosaccharomyces octosporus yFS286
P4243|Iso_7238|II|SPBC337.08c	gi|891571872|ref|XP_013020050.1|	6.26e-46	76	Schizosaccharomyces octosporus yFS286;Schizosaccharomyces cryophilus OY26
P4243|Iso_7238|II|SPBC337.08c	gi|891589343|ref|XP_013023551.1|	1.81e-45	76	Schizosaccharomyces cryophilus OY26
P4243|Iso_7238|II|SPBC337.08c	gi|213402235|ref|XP_002171890.1|	1.24e-22	76	Schizosaccharomyces japonicus yFS275
P4243|Iso_7238|II|SPBC337.08c	gi|891585640|ref|XP_013022770.1|	3.03e-22	77	Schizosaccharomyces cryophilus OY26
P4243|Iso_7238|II|SPBC337.08c	gi|891551229|ref|XP_013017209.1|	3.22e-22	76	Schizosaccharomyces octosporus yFS286
P4243|Iso_7238|II|SPBC337.08c	gi|891568488|ref|XP_013019427.1|	3.97e-05	69	Schizosaccharomyces octosporus yFS286
P4243|Iso_7238|II|SPBC337.08c	gi|891589137|ref|XP_013023448.1|	0.000133	69	Schizosaccharomyces cryophilus OY26
P4243|Iso_7238|II|SPBC337.08c	gi|891589325|ref|XP_013023542.1|	0.002	61	Schizosaccharomyces cryophilus OY26
P4243|Iso_7238|II|SPBC337.08c	gi|213402873|ref|XP_002172209.1|	0.002	74	Schizosaccharomyces japonicus yFS275
P4243|Iso_7238|II|SPBC337.08c	gi|891557875|ref|XP_013018128.1|	0.002	65	Schizosaccharomyces octosporus yFS286
P4243|Iso_7238|II|SPBC337.08c	gi|891573652|ref|XP_013020955.1|	0.002	76	Schizosaccharomyces cryophilus OY26
P4243|Iso_7238|II|SPBC337.08c	gi|213405369|ref|XP_002173456.1|	0.008	61	Schizosaccharomyces japonicus yFS275
P4243|Iso_7238|II|SPBC337.08c	gi|213407784|ref|XP_002174663.1|	0.015	44	Schizosaccharomyces japonicus yFS275
P4253|Iso_7248|II|SPBC337.12	gi|891602396|ref|XP_013025763.1|	1.04e-128	350	Schizosaccharomyces cryophilus OY26
P4253|Iso_7248|II|SPBC337.12	gi|891553149|ref|XP_013017446.1|	3.13e-123	342	Schizosaccharomyces octosporus yFS286
P4253|Iso_7248|II|SPBC337.12	gi|213401925|ref|XP_002171735.1|	2.66e-93	337	Schizosaccharomyces japonicus yFS275
P4253|Iso_7248|II|SPBC337.12	gi|213402063|ref|XP_002171804.1|	3.03e-10	118	Schizosaccharomyces japonicus yFS275
P4253|Iso_7248|II|SPBC337.12	gi|891545981|ref|XP_013016419.1|	1.05e-09	80	Schizosaccharomyces octosporus yFS286
P4253|Iso_7248|II|SPBC337.12	gi|891602210|ref|XP_013025672.1|	3.45e-09	80	Schizosaccharomyces cryophilus OY26
P4253|Iso_7248|II|SPBC337.12	gi|213404030|ref|XP_002172787.1|	0.006	51	Schizosaccharomyces japonicus yFS275
P4253|Iso_7248|II|SPBC337.12	gi|213407162|ref|XP_002174352.1|	0.006	37	Schizosaccharomyces japonicus yFS275
P4253|Iso_7248|II|SPBC337.12	gi|891590907|ref|XP_013023783.1|	0.013	37	Schizosaccharomyces cryophilus OY26
P4253|Iso_7248|II|SPBC337.12	gi|891548218|ref|XP_013016732.1|	0.014	37	Schizosaccharomyces octosporus yFS286
P4253|Iso_7248|II|SPBC337.12	gi|891585315|ref|XP_013022608.1|	0.017	59	Schizosaccharomyces cryophilus OY26
P4253|Iso_7248|II|SPBC337.12	gi|891559864|ref|XP_013018327.1|	0.025	59	Schizosaccharomyces octosporus yFS286
P4327|Iso_7370,Iso_7379|II|SPBC1709.14	gi|891602468|ref|XP_013025799.1|	2.84e-28	98	Schizosaccharomyces cryophilus OY26
P4327|Iso_7370,Iso_7379|II|SPBC1709.14	gi|891552415|ref|XP_013017411.1|	1.31e-27	99	Schizosaccharomyces octosporus yFS286
P4327|Iso_7370,Iso_7379|II|SPBC1709.14	gi|213407232|ref|XP_002174387.1|	2.12e-20	98	Schizosaccharomyces japonicus yFS275
P4449|Iso_7572,Iso_7602,Iso_7604|II|SPBC27B12.05	gi|891602653|ref|XP_013025891.1|	1.44e-70	169	Schizosaccharomyces cryophilus OY26
P4449|Iso_7572,Iso_7602,Iso_7604|II|SPBC27B12.05	gi|891551451|ref|XP_013017320.1|	1.18e-66	169	Schizosaccharomyces octosporus yFS286
P4449|Iso_7572,Iso_7602,Iso_7604|II|SPBC27B12.05	gi|745752240|ref|XP_002174651.2|	1.06e-43	171	Schizosaccharomyces japonicus yFS275
P4731|Iso_8050|II|SPBC18H10.08c	gi|891585720|ref|XP_013022810.1|	0	491	Schizosaccharomyces cryophilus OY26
P4731|Iso_8050|II|SPBC18H10.08c	gi|891551149|ref|XP_013017169.1|	0	491	Schizosaccharomyces octosporus yFS286
P4731|Iso_8050|II|SPBC18H10.08c	gi|745752206|ref|XP_002174576.2|	2.38e-146	488	Schizosaccharomyces japonicus yFS275
P4731|Iso_8050|II|SPBC18H10.08c	gi|213409938|ref|XP_002175739.1|	4.21e-32	188	Schizosaccharomyces japonicus yFS275
P4731|Iso_8050|II|SPBC18H10.08c	gi|891599700|ref|XP_013025443.1|	8.09e-30	204	Schizosaccharomyces cryophilus OY26
P4731|Iso_8050|II|SPBC18H10.08c	gi|891565582|ref|XP_013019030.1|	2.49e-29	188	Schizosaccharomyces octosporus yFS286
P4731|Iso_8050|II|SPBC18H10.08c	gi|891598944|ref|XP_013025131.1|	2.42e-27	209	Schizosaccharomyces cryophilus OY26
P4731|Iso_8050|II|SPBC18H10.08c	gi|213409127|ref|XP_002175334.1|	4.28e-27	188	Schizosaccharomyces japonicus yFS275
P4731|Iso_8050|II|SPBC18H10.08c	gi|891568305|ref|XP_013019336.1|	1.32e-26	198	Schizosaccharomyces octosporus yFS286
P4731|Iso_8050|II|SPBC18H10.08c	gi|213405707|ref|XP_002173625.1|	4.85e-23	387	Schizosaccharomyces japonicus yFS275
P4731|Iso_8050|II|SPBC18H10.08c	gi|891579514|ref|XP_013021774.1|	7.34e-22	388	Schizosaccharomyces cryophilus OY26
P4731|Iso_8050|II|SPBC18H10.08c	gi|891542416|ref|XP_013015902.1|	6.7e-21	385	Schizosaccharomyces octosporus yFS286
P4731|Iso_8050|II|SPBC18H10.08c	gi|213408228|ref|XP_002174885.1|	1.92e-20	451	Schizosaccharomyces japonicus yFS275
P4731|Iso_8050|II|SPBC18H10.08c	gi|891571160|ref|XP_013019724.1|	1.22e-19	403	Schizosaccharomyces octosporus yFS286
P4731|Iso_8050|II|SPBC18H10.08c	gi|891558598|ref|XP_013018167.1|	2.44e-18	177	Schizosaccharomyces octosporus yFS286
P4731|Iso_8050|II|SPBC18H10.08c	gi|891574082|ref|XP_013020980.1|	6.46e-18	301	Schizosaccharomyces cryophilus OY26
P4731|Iso_8050|II|SPBC18H10.08c	gi|891575242|ref|XP_013021170.1|	1.32e-17	403	Schizosaccharomyces cryophilus OY26
P4731|Iso_8050|II|SPBC18H10.08c	gi|213402105|ref|XP_002171825.1|	8.93e-16	312	Schizosaccharomyces japonicus yFS275
P4731|Iso_8050|II|SPBC18H10.08c	gi|891599317|ref|XP_013025317.1|	1.22e-13	360	Schizosaccharomyces cryophilus OY26
P4731|Iso_8050|II|SPBC18H10.08c	gi|891565860|ref|XP_013019153.1|	6.04e-12	353	Schizosaccharomyces octosporus yFS286
P4731|Iso_8050|II|SPBC18H10.08c	gi|891568652|ref|XP_013019509.1|	9.17e-11	353	Schizosaccharomyces octosporus yFS286
P4731|Iso_8050|II|SPBC18H10.08c	gi|891589405|ref|XP_013023582.1|	1.18e-10	352	Schizosaccharomyces cryophilus OY26
P4731|Iso_8050|II|SPBC18H10.08c	gi|213402155|ref|XP_002171850.1|	1.33e-08	379	Schizosaccharomyces japonicus yFS275
P4731|Iso_8050|II|SPBC18H10.08c	gi|745752282|ref|XP_002174822.2|	1.78e-08	356	Schizosaccharomyces japonicus yFS275
P4731|Iso_8050|II|SPBC18H10.08c	gi|213402291|ref|XP_002171918.1|	2.9e-08	305	Schizosaccharomyces japonicus yFS275
P4731|Iso_8050|II|SPBC18H10.08c	gi|891548414|ref|XP_013016830.1|	3.59e-08	351	Schizosaccharomyces octosporus yFS286
P4731|Iso_8050|II|SPBC18H10.08c	gi|891592119|ref|XP_013023879.1|	6.18e-08	356	Schizosaccharomyces cryophilus OY26
P4731|Iso_8050|II|SPBC18H10.08c	gi|891580553|ref|XP_013021879.1|	1.61e-07	378	Schizosaccharomyces cryophilus OY26
P4731|Iso_8050|II|SPBC18H10.08c	gi|891553955|ref|XP_013017516.1|	5.32e-07	378	Schizosaccharomyces octosporus yFS286
P4731|Iso_8050|II|SPBC18H10.08c	gi|891574679|ref|XP_013021030.1|	1.52e-06	294	Schizosaccharomyces cryophilus OY26
P4731|Iso_8050|II|SPBC18H10.08c	gi|891551297|ref|XP_013017243.1|	1.59e-06	389	Schizosaccharomyces octosporus yFS286
P4731|Iso_8050|II|SPBC18H10.08c	gi|745750569|ref|XP_002172032.2|	1.96e-05	377	Schizosaccharomyces japonicus yFS275
P4731|Iso_8050|II|SPBC18H10.08c	gi|891589325|ref|XP_013023542.1|	3.36e-05	276	Schizosaccharomyces cryophilus OY26
P4731|Iso_8050|II|SPBC18H10.08c	gi|213405369|ref|XP_002173456.1|	6.94e-05	115	Schizosaccharomyces japonicus yFS275
P4731|Iso_8050|II|SPBC18H10.08c	gi|891568574|ref|XP_013019470.1|	0.00011	267	Schizosaccharomyces octosporus yFS286
P4731|Iso_8050|II|SPBC18H10.08c	gi|213402475|ref|XP_002172010.1|	0.000117	209	Schizosaccharomyces japonicus yFS275
P4731|Iso_8050|II|SPBC18H10.08c	gi|745753952|ref|XP_002172561.2|	0.000188	376	Schizosaccharomyces japonicus yFS275
P4731|Iso_8050|II|SPBC18H10.08c	gi|891542675|ref|XP_013016031.1|	0.000386	181	Schizosaccharomyces octosporus yFS286
P4731|Iso_8050|II|SPBC18H10.08c	gi|891594295|ref|XP_013024371.1|	0.000439	245	Schizosaccharomyces cryophilus OY26
P4731|Iso_8050|II|SPBC18H10.08c	gi|891585327|ref|XP_013022614.1|	0.01	83	Schizosaccharomyces cryophilus OY26
P4901|Iso_8331,Iso_8337|II|SPBC29A3.14c	gi|891602168|ref|XP_013025651.1|	0.000665	53	Schizosaccharomyces cryophilus OY26
P4901|Iso_8331,Iso_8337|II|SPBC29A3.14c	gi|891546263|ref|XP_013016438.1|	0.004	53	Schizosaccharomyces octosporus yFS286
P4935|Iso_8409,Iso_8413|II|SPBC1711.03	gi|891576298|ref|XP_013021361.1|	4.14e-78	136	Schizosaccharomyces cryophilus OY26
P4935|Iso_8409,Iso_8413|II|SPBC1711.03	gi|891556021|ref|XP_013017811.1|	2.27e-77	136	Schizosaccharomyces octosporus yFS286
P4935|Iso_8409,Iso_8413|II|SPBC1711.03	gi|213403216|ref|XP_002172380.1|	8.24e-50	136	Schizosaccharomyces japonicus yFS275
P4937|Iso_8411|II|SPBC1711.03	gi|891556021|ref|XP_013017811.1|	5.92e-148	250	Schizosaccharomyces octosporus yFS286
P4937|Iso_8411|II|SPBC1711.03	gi|891576298|ref|XP_013021361.1|	8.96e-148	250	Schizosaccharomyces cryophilus OY26
P4937|Iso_8411|II|SPBC1711.03	gi|213403216|ref|XP_002172380.1|	1.94e-102	250	Schizosaccharomyces japonicus yFS275
P4939|Iso_8414|II|SPBC1711.03	gi|891556021|ref|XP_013017811.1|	6.77e-22	43	Schizosaccharomyces octosporus yFS286
P4939|Iso_8414|II|SPBC1711.03	gi|891576298|ref|XP_013021361.1|	1.37e-21	43	Schizosaccharomyces cryophilus OY26
P4939|Iso_8414|II|SPBC1711.03	gi|213403216|ref|XP_002172380.1|	2.28e-12	42	Schizosaccharomyces japonicus yFS275
P4954|Iso_8433|II|SPBC1711.10c	gi|891547789|ref|XP_013016518.1|	0	575	Schizosaccharomyces octosporus yFS286
P4954|Iso_8433|II|SPBC1711.10c	gi|891601602|ref|XP_013025572.1|	0	590	Schizosaccharomyces cryophilus OY26
P4954|Iso_8433|II|SPBC1711.10c	gi|745753888|ref|XP_002172387.2|	0	575	Schizosaccharomyces japonicus yFS275
P5001|Iso_8505,Iso_8506|II|SPBC14C8.15	gi|891600910|ref|XP_013025536.1|	0	449	Schizosaccharomyces cryophilus OY26
P5001|Iso_8505,Iso_8506|II|SPBC14C8.15	gi|891547859|ref|XP_013016553.1|	0	404	Schizosaccharomyces octosporus yFS286
P5001|Iso_8505,Iso_8506|II|SPBC14C8.15	gi|745754258|ref|XP_002173286.2|	1.95e-163	406	Schizosaccharomyces japonicus yFS275
P5001|Iso_8505,Iso_8506|II|SPBC14C8.15	gi|891596006|ref|XP_013024747.1|	2.59e-112	413	Schizosaccharomyces cryophilus OY26
P5001|Iso_8505,Iso_8506|II|SPBC14C8.15	gi|891599187|ref|XP_013025252.1|	4.16e-111	374	Schizosaccharomyces cryophilus OY26
P5001|Iso_8505,Iso_8506|II|SPBC14C8.15	gi|891563778|ref|XP_013018877.1|	4.79e-111	413	Schizosaccharomyces octosporus yFS286
P5001|Iso_8505,Iso_8506|II|SPBC14C8.15	gi|745753768|ref|XP_002175871.2|	1.3e-110	426	Schizosaccharomyces japonicus yFS275
P5001|Iso_8505,Iso_8506|II|SPBC14C8.15	gi|891566883|ref|XP_013019218.1|	6.22e-107	425	Schizosaccharomyces octosporus yFS286
P5001|Iso_8505,Iso_8506|II|SPBC14C8.15	gi|213401365|ref|XP_002171455.1|	1.41e-106	431	Schizosaccharomyces japonicus yFS275
P5050|Iso_8581|II|SPBC16H5.04	gi|891580242|ref|XP_013021853.1|	6.71e-69	142	Schizosaccharomyces cryophilus OY26
P5050|Iso_8581|II|SPBC16H5.04	gi|891554007|ref|XP_013017542.1|	1.29e-68	145	Schizosaccharomyces octosporus yFS286
P5050|Iso_8581|II|SPBC16H5.04	gi|213402213|ref|XP_002171879.1|	4.79e-58	147	Schizosaccharomyces japonicus yFS275
P5050|Iso_8581|II|SPBC16H5.04	gi|891571893|ref|XP_013020054.1|	5.36e-24	105	Schizosaccharomyces octosporus yFS286
P5050|Iso_8581|II|SPBC16H5.04	gi|891579058|ref|XP_013021602.1|	4.61e-23	105	Schizosaccharomyces cryophilus OY26
P5050|Iso_8581|II|SPBC16H5.04	gi|213404500|ref|XP_002173022.1|	4.87e-19	98	Schizosaccharomyces japonicus yFS275
P5157|Iso_8757|II|SPBP18G5.02	gi|891559619|ref|XP_013018205.1|	2.51e-34	85	Schizosaccharomyces octosporus yFS286
P5157|Iso_8757|II|SPBP18G5.02	gi|891585565|ref|XP_013022733.1|	6.38e-34	85	Schizosaccharomyces cryophilus OY26
P5157|Iso_8757|II|SPBP18G5.02	gi|213401385|ref|XP_002171465.1|	7.26e-21	99	Schizosaccharomyces japonicus yFS275
P5184|Iso_8794|II|SPBC12C2.12c	gi|891559655|ref|XP_013018223.1|	2.41e-64	107	Schizosaccharomyces octosporus yFS286
P5184|Iso_8794|II|SPBC12C2.12c	gi|891585529|ref|XP_013022715.1|	2.68e-61	107	Schizosaccharomyces cryophilus OY26
P5184|Iso_8794|II|SPBC12C2.12c	gi|213410078|ref|XP_002175809.1|	4.2e-53	107	Schizosaccharomyces japonicus yFS275
P5295|Iso_8985|II|SPBC6B1.09c	gi|891551289|ref|XP_013017239.1|	4.67e-44	516	Schizosaccharomyces octosporus yFS286
P5295|Iso_8985|II|SPBC6B1.09c	gi|891574663|ref|XP_013021026.1|	2.9e-32	516	Schizosaccharomyces cryophilus OY26
P5295|Iso_8985|II|SPBC6B1.09c	gi|213402283|ref|XP_002171914.1|	6.4e-07	132	Schizosaccharomyces japonicus yFS275
P5309|Iso_9022|II|SPBC3E7.04c	gi|891574645|ref|XP_013021021.1|	4.31e-67	371	Schizosaccharomyces cryophilus OY26
P5309|Iso_9022|II|SPBC3E7.04c	gi|891551277|ref|XP_013017233.1|	3.7e-63	386	Schizosaccharomyces octosporus yFS286
P5309|Iso_9022|II|SPBC3E7.04c	gi|213404952|ref|XP_002173248.1|	9.09e-38	318	Schizosaccharomyces japonicus yFS275
P5314|Iso_9029,Iso_9040,Iso_9041|II|SPBC3E7.04c	gi|891574645|ref|XP_013021021.1|	0.000161	38	Schizosaccharomyces cryophilus OY26
P5316|Iso_9034|II|SPBC3E7.04c	gi|891574645|ref|XP_013021021.1|	4.97e-52	340	Schizosaccharomyces cryophilus OY26
P5316|Iso_9034|II|SPBC3E7.04c	gi|891551277|ref|XP_013017233.1|	1.53e-48	354	Schizosaccharomyces octosporus yFS286
P5316|Iso_9034|II|SPBC3E7.04c	gi|213404952|ref|XP_002173248.1|	1.69e-25	288	Schizosaccharomyces japonicus yFS275
P5319|Iso_9046|II|SPBC3E7.05c	gi|891574641|ref|XP_013021020.1|	4.43e-177	536	Schizosaccharomyces cryophilus OY26
P5319|Iso_9046|II|SPBC3E7.05c	gi|891551275|ref|XP_013017232.1|	3.39e-176	555	Schizosaccharomyces octosporus yFS286
P5319|Iso_9046|II|SPBC3E7.05c	gi|213404954|ref|XP_002173249.1|	2.05e-65	489	Schizosaccharomyces japonicus yFS275
P5444|Iso_9244,Iso_9250,Iso_9251,Iso_9252|II|SPBC19C7.10	gi|891574777|ref|XP_013021054.1|	3.74e-13	44	Schizosaccharomyces cryophilus OY26
P5444|Iso_9244,Iso_9250,Iso_9251,Iso_9252|II|SPBC19C7.10	gi|891551345|ref|XP_013017267.1|	7.29e-13	44	Schizosaccharomyces octosporus yFS286
P5444|Iso_9244,Iso_9250,Iso_9251,Iso_9252|II|SPBC19C7.10	gi|213403486|ref|XP_002172515.1|	7.38e-12	52	Schizosaccharomyces japonicus yFS275
P5446|Iso_9248|II|SPBC19C7.10	gi|891574777|ref|XP_013021054.1|	3.91e-101	429	Schizosaccharomyces cryophilus OY26
P5446|Iso_9248|II|SPBC19C7.10	gi|891551345|ref|XP_013017267.1|	1.1e-98	460	Schizosaccharomyces octosporus yFS286
P5446|Iso_9248|II|SPBC19C7.10	gi|213403486|ref|XP_002172515.1|	3.3e-67	180	Schizosaccharomyces japonicus yFS275
P5446|Iso_9248|II|SPBC19C7.10	gi|891574949|ref|XP_013021100.1|	0.017	118	Schizosaccharomyces cryophilus OY26
P5540|Iso_9437|II|SPBC2A9.09	gi|891573897|ref|XP_013020968.1|	6.02e-49	116	Schizosaccharomyces cryophilus OY26
P5540|Iso_9437|II|SPBC2A9.09	gi|891558124|ref|XP_013018141.1|	1.4e-48	114	Schizosaccharomyces octosporus yFS286
P5540|Iso_9437|II|SPBC2A9.09	gi|213402129|ref|XP_002171837.1|	2.85e-40	123	Schizosaccharomyces japonicus yFS275
P5540|Iso_9437|II|SPBC2A9.09	gi|745753685|ref|XP_011049010.1|	2.7e-05	125	Schizosaccharomyces japonicus yFS275
P5540|Iso_9437|II|SPBC2A9.09	gi|745750621|ref|XP_002171889.2|	0.031	63	Schizosaccharomyces japonicus yFS275
P5540|Iso_9437|II|SPBC2A9.09	gi|891592487|ref|XP_013024063.1|	0.033	128	Schizosaccharomyces cryophilus OY26
P5600|Iso_9544|II|SPBC15D4.13c	gi|891573302|ref|XP_013020934.1|	6.04e-37	94	Schizosaccharomyces cryophilus OY26
P5600|Iso_9544|II|SPBC15D4.13c	gi|891557556|ref|XP_013018107.1|	3.34e-34	95	Schizosaccharomyces octosporus yFS286
P5600|Iso_9544|II|SPBC15D4.13c	gi|213407002|ref|XP_002174272.1|	1.32e-17	101	Schizosaccharomyces japonicus yFS275
P5620|Iso_9573|II|SPBC30D10.18c	gi|891557414|ref|XP_013018093.1|	4.24e-37	67	Schizosaccharomyces octosporus yFS286
P5620|Iso_9573|II|SPBC30D10.18c	gi|891573084|ref|XP_013020920.1|	6.65e-37	67	Schizosaccharomyces cryophilus OY26
P5620|Iso_9573|II|SPBC30D10.18c	gi|213405935|ref|XP_002173739.1|	1.67e-36	67	Schizosaccharomyces japonicus yFS275
P5620|Iso_9573|II|SPBC30D10.18c	gi|213407034|ref|XP_002174288.1|	2.25e-36	67	Schizosaccharomyces japonicus yFS275
P5620|Iso_9573|II|SPBC30D10.18c	gi|891567065|ref|XP_013019229.1|	6.75e-36	67	Schizosaccharomyces octosporus yFS286
P5620|Iso_9573|II|SPBC30D10.18c	gi|891599161|ref|XP_013025239.1|	1.18e-35	67	Schizosaccharomyces cryophilus OY26
P5754|Iso_9768|II|SPBC776.12c	gi|891572352|ref|XP_013020860.1|	1.44e-48	160	Schizosaccharomyces cryophilus OY26
P5754|Iso_9768|II|SPBC776.12c	gi|891557154|ref|XP_013018032.1|	3.9e-47	164	Schizosaccharomyces octosporus yFS286
P5754|Iso_9768|II|SPBC776.12c	gi|213407110|ref|XP_002174326.1|	7.29e-39	120	Schizosaccharomyces japonicus yFS275
P5754|Iso_9768|II|SPBC776.12c	gi|891575520|ref|XP_013021237.1|	2.58e-05	81	Schizosaccharomyces cryophilus OY26
P5754|Iso_9768|II|SPBC776.12c	gi|891571292|ref|XP_013019790.1|	6.34e-05	81	Schizosaccharomyces octosporus yFS286
P5754|Iso_9768|II|SPBC776.12c	gi|891542390|ref|XP_013015889.1|	0.002	99	Schizosaccharomyces octosporus yFS286
P5754|Iso_9768|II|SPBC776.12c	gi|891542617|ref|XP_013016002.1|	0.002	33	Schizosaccharomyces octosporus yFS286
P5754|Iso_9768|II|SPBC776.12c	gi|891554180|ref|XP_013017628.1|	0.006	70	Schizosaccharomyces octosporus yFS286
P5754|Iso_9768|II|SPBC776.12c	gi|891600158|ref|XP_013025485.1|	0.006	70	Schizosaccharomyces cryophilus OY26
P5754|Iso_9768|II|SPBC776.12c	gi|891579583|ref|XP_013021787.1|	0.007	31	Schizosaccharomyces cryophilus OY26
P5754|Iso_9768|II|SPBC776.12c	gi|891579280|ref|XP_013021676.1|	0.008	71	Schizosaccharomyces cryophilus OY26
P5754|Iso_9768|II|SPBC776.12c	gi|891572325|ref|XP_013020097.1|	0.011	43	Schizosaccharomyces octosporus yFS286
P5754|Iso_9768|II|SPBC776.12c	gi|745750731|ref|XP_002171629.2|	0.011	31	Schizosaccharomyces japonicus yFS275
P5754|Iso_9768|II|SPBC776.12c	gi|213409748|ref|XP_002175644.1|	0.011	49	Schizosaccharomyces japonicus yFS275
P5754|Iso_9768|II|SPBC776.12c	gi|891585225|ref|XP_013022563.1|	0.015	51	Schizosaccharomyces cryophilus OY26
P5754|Iso_9768|II|SPBC776.12c	gi|891559959|ref|XP_013018374.1|	0.015	51	Schizosaccharomyces octosporus yFS286
P5754|Iso_9768|II|SPBC776.12c	gi|891582620|ref|XP_013022291.1|	0.022	44	Schizosaccharomyces cryophilus OY26
P5754|Iso_9768|II|SPBC776.12c	gi|891578879|ref|XP_013021558.1|	0.024	41	Schizosaccharomyces cryophilus OY26
P5754|Iso_9768|II|SPBC776.12c	gi|891547939|ref|XP_013016593.1|	0.031	96	Schizosaccharomyces octosporus yFS286
P5754|Iso_9768|II|SPBC776.12c	gi|213406053|ref|XP_002173798.1|	0.036	70	Schizosaccharomyces japonicus yFS275
P5754|Iso_9768|II|SPBC776.12c	gi|891562651|ref|XP_013018637.1|	0.045	44	Schizosaccharomyces octosporus yFS286
P5897|Iso_10046|II|SPBC17D1.07c	gi|891557032|ref|XP_013017971.1|	1.29e-146	514	Schizosaccharomyces octosporus yFS286
P5897|Iso_10046|II|SPBC17D1.07c	gi|891595365|ref|XP_013024429.1|	1.58e-145	514	Schizosaccharomyces cryophilus OY26
P5904|Iso_10064|II|SPBC11C11.01	gi|891595367|ref|XP_013024430.1|	3.09e-98	410	Schizosaccharomyces cryophilus OY26
P5904|Iso_10064|II|SPBC11C11.01	gi|891557030|ref|XP_013017970.1|	7.41e-89	384	Schizosaccharomyces octosporus yFS286
P5904|Iso_10064|II|SPBC11C11.01	gi|213408859|ref|XP_002175200.1|	4.88e-62	364	Schizosaccharomyces japonicus yFS275
P5904|Iso_10064|II|SPBC11C11.01	gi|891591824|ref|XP_013023838.1|	0.002	71	Schizosaccharomyces cryophilus OY26
P5904|Iso_10064|II|SPBC11C11.01	gi|891574360|ref|XP_013020993.1|	0.002	86	Schizosaccharomyces cryophilus OY26
P5904|Iso_10064|II|SPBC11C11.01	gi|891558288|ref|XP_013018153.1|	0.016	98	Schizosaccharomyces octosporus yFS286
P5920|Iso_10091|II|SPBC11C11.04c	gi|891557024|ref|XP_013017967.1|	1.35e-42	219	Schizosaccharomyces octosporus yFS286
P5920|Iso_10091|II|SPBC11C11.04c	gi|891595373|ref|XP_013024433.1|	1.5e-38	219	Schizosaccharomyces cryophilus OY26
P5920|Iso_10091|II|SPBC11C11.04c	gi|745752558|ref|XP_002175195.2|	6.07e-21	232	Schizosaccharomyces japonicus yFS275
P5963|Iso_10163,Iso_10164|II|SPBC4B4.03	gi|891597416|ref|XP_013024949.1|	7.07e-27	103	Schizosaccharomyces cryophilus OY26
P5963|Iso_10163,Iso_10164|II|SPBC4B4.03	gi|891574210|ref|XP_013020232.1|	1.24e-26	112	Schizosaccharomyces octosporus yFS286
P5963|Iso_10163,Iso_10164|II|SPBC4B4.03	gi|745752650|ref|XP_002174918.2|	2.87e-09	94	Schizosaccharomyces japonicus yFS275
P6027|Iso_10276,Iso_10277|II|SPBC2G2.13c	gi|891573864|ref|XP_013020210.1|	7.05e-23	58	Schizosaccharomyces octosporus yFS286
P6027|Iso_10276,Iso_10277|II|SPBC2G2.13c	gi|891597805|ref|XP_013024971.1|	8.51e-23	58	Schizosaccharomyces cryophilus OY26
P6027|Iso_10276,Iso_10277|II|SPBC2G2.13c	gi|745752666|ref|XP_002174901.2|	1.12e-19	61	Schizosaccharomyces japonicus yFS275
P6036|Iso_10294,Iso_10298,Iso_10306|II|SPBC1718.02	gi|891575083|ref|XP_013021131.1|	2.76e-86	406	Schizosaccharomyces cryophilus OY26
P6036|Iso_10294,Iso_10298,Iso_10306|II|SPBC1718.02	gi|891570533|ref|XP_013019685.1|	4.39e-84	402	Schizosaccharomyces octosporus yFS286
P6036|Iso_10294,Iso_10298,Iso_10306|II|SPBC1718.02	gi|213406159|ref|XP_002173851.1|	7.35e-63	204	Schizosaccharomyces japonicus yFS275
P6036|Iso_10294,Iso_10298,Iso_10306|II|SPBC1718.02	gi|891573582|ref|XP_013020190.1|	9.12e-06	91	Schizosaccharomyces octosporus yFS286
P6036|Iso_10294,Iso_10298,Iso_10306|II|SPBC1718.02	gi|745752128|ref|XP_002174414.2|	1.66e-05	107	Schizosaccharomyces japonicus yFS275
P6036|Iso_10294,Iso_10298,Iso_10306|II|SPBC1718.02	gi|745754134|ref|XP_002172953.2|	2.06e-05	36	Schizosaccharomyces japonicus yFS275
P6036|Iso_10294,Iso_10298,Iso_10306|II|SPBC1718.02	gi|891595443|ref|XP_013024468.1|	0.001	45	Schizosaccharomyces cryophilus OY26
P6036|Iso_10294,Iso_10298,Iso_10306|II|SPBC1718.02	gi|891569392|ref|XP_013019604.1|	0.004	52	Schizosaccharomyces octosporus yFS286
P6036|Iso_10294,Iso_10298,Iso_10306|II|SPBC1718.02	gi|745752416|ref|XP_002175504.2|	0.012	49	Schizosaccharomyces japonicus yFS275
P6050|Iso_10323|II|SPBC1105.01	gi|891575053|ref|XP_013021124.1|	1.57e-36	130	Schizosaccharomyces cryophilus OY26
P6050|Iso_10323|II|SPBC1105.01	gi|891570415|ref|XP_013019678.1|	5.59e-35	128	Schizosaccharomyces octosporus yFS286
P6050|Iso_10323|II|SPBC1105.01	gi|213410004|ref|XP_002175772.1|	1.5e-34	176	Schizosaccharomyces japonicus yFS275
P6050|Iso_10323|II|SPBC1105.01	gi|891583640|ref|XP_013022437.1|	1.51e-07	118	Schizosaccharomyces cryophilus OY26
P6050|Iso_10323|II|SPBC1105.01	gi|213403600|ref|XP_002172572.1|	3.13e-07	129	Schizosaccharomyces japonicus yFS275
P6050|Iso_10323|II|SPBC1105.01	gi|891560775|ref|XP_013018500.1|	3.28e-07	118	Schizosaccharomyces octosporus yFS286
P6271|Iso_10720|II|SPBC21C3.05	gi|891575472|ref|XP_013021224.1|	3.4e-15	33	Schizosaccharomyces cryophilus OY26
P6271|Iso_10720|II|SPBC21C3.05	gi|891571266|ref|XP_013019777.1|	3.61e-15	33	Schizosaccharomyces octosporus yFS286
P6382|Iso_10894|II|SPBC3B9.06c	gi|891582162|ref|XP_013022075.1|	2.1e-105	210	Schizosaccharomyces cryophilus OY26
P6382|Iso_10894|II|SPBC3B9.06c	gi|891571441|ref|XP_013019864.1|	3.74e-101	210	Schizosaccharomyces octosporus yFS286
P6382|Iso_10894|II|SPBC3B9.06c	gi|213404078|ref|XP_002172811.1|	4.23e-73	227	Schizosaccharomyces japonicus yFS275
P6417|Iso_10963|II|SPBC3B9.14c	gi|891582144|ref|XP_013022066.1|	5.15e-59	138	Schizosaccharomyces cryophilus OY26
P6417|Iso_10963|II|SPBC3B9.14c	gi|891571457|ref|XP_013019872.1|	8.43e-59	138	Schizosaccharomyces octosporus yFS286
P6417|Iso_10963|II|SPBC3B9.14c	gi|213408739|ref|XP_002175140.1|	6.29e-35	139	Schizosaccharomyces japonicus yFS275
P6477|Iso_11073|II|SPBC56F2.12	gi|891581557|ref|XP_013021936.1|	2.32e-142	200	Schizosaccharomyces cryophilus OY26
P6477|Iso_11073|II|SPBC56F2.12	gi|891571709|ref|XP_013019998.1|	9.12e-141	200	Schizosaccharomyces octosporus yFS286
P6477|Iso_11073|II|SPBC56F2.12	gi|745750705|ref|XP_002171679.2|	1.99e-124	200	Schizosaccharomyces japonicus yFS275
P6500|Iso_11115,Iso_11116|II|SPBC1861.08c	gi|891581927|ref|XP_013021959.1|	1.54e-123	214	Schizosaccharomyces cryophilus OY26
P6500|Iso_11115,Iso_11116|II|SPBC1861.08c	gi|213407198|ref|XP_002174370.1|	2.29e-115	215	Schizosaccharomyces japonicus yFS275
P6500|Iso_11115,Iso_11116|II|SPBC1861.08c	gi|891571667|ref|XP_013019977.1|	6.36e-114	215	Schizosaccharomyces octosporus yFS286
P6500|Iso_11115,Iso_11116|II|SPBC1861.08c	gi|213406197|ref|XP_002173870.1|	1.62e-05	106	Schizosaccharomyces japonicus yFS275
P6500|Iso_11115,Iso_11116|II|SPBC1861.08c	gi|891585557|ref|XP_013022729.1|	1.77e-05	86	Schizosaccharomyces cryophilus OY26
P6500|Iso_11115,Iso_11116|II|SPBC1861.08c	gi|891559627|ref|XP_013018209.1|	3.84e-05	86	Schizosaccharomyces octosporus yFS286
P6500|Iso_11115,Iso_11116|II|SPBC1861.08c	gi|213401405|ref|XP_002171475.1|	0.000188	95	Schizosaccharomyces japonicus yFS275
P6500|Iso_11115,Iso_11116|II|SPBC1861.08c	gi|213403472|ref|XP_002172508.1|	0.00054	70	Schizosaccharomyces japonicus yFS275
P6500|Iso_11115,Iso_11116|II|SPBC1861.08c	gi|891590777|ref|XP_013023768.1|	0.003	41	Schizosaccharomyces cryophilus OY26
P6500|Iso_11115,Iso_11116|II|SPBC1861.08c	gi|745752360|ref|XP_002176035.2|	0.006	83	Schizosaccharomyces japonicus yFS275
P6548|Iso_11190|II|SPBC16G5.07c	gi|891563485|ref|XP_013018861.1|	7.37e-29	82	Schizosaccharomyces octosporus yFS286
P6548|Iso_11190|II|SPBC16G5.07c	gi|891596040|ref|XP_013024764.1|	1.48e-25	85	Schizosaccharomyces cryophilus OY26
P6548|Iso_11190|II|SPBC16G5.07c	gi|745752086|ref|XP_002174333.2|	6.47e-09	91	Schizosaccharomyces japonicus yFS275
P6577|Iso_11237|II|SPBC16A3.12c	gi|891596006|ref|XP_013024747.1|	0	416	Schizosaccharomyces cryophilus OY26
P6577|Iso_11237|II|SPBC16A3.12c	gi|891563778|ref|XP_013018877.1|	0	416	Schizosaccharomyces octosporus yFS286
P6577|Iso_11237|II|SPBC16A3.12c	gi|745753768|ref|XP_002175871.2|	0	418	Schizosaccharomyces japonicus yFS275
P6577|Iso_11237|II|SPBC16A3.12c	gi|891599187|ref|XP_013025252.1|	6.54e-129	364	Schizosaccharomyces cryophilus OY26
P6577|Iso_11237|II|SPBC16A3.12c	gi|891566883|ref|XP_013019218.1|	2.61e-126	423	Schizosaccharomyces octosporus yFS286
P6577|Iso_11237|II|SPBC16A3.12c	gi|213401365|ref|XP_002171455.1|	2.54e-121	371	Schizosaccharomyces japonicus yFS275
P6577|Iso_11237|II|SPBC16A3.12c	gi|891600910|ref|XP_013025536.1|	1.01e-115	434	Schizosaccharomyces cryophilus OY26
P6577|Iso_11237|II|SPBC16A3.12c	gi|745754258|ref|XP_002173286.2|	1.41e-111	391	Schizosaccharomyces japonicus yFS275
P6577|Iso_11237|II|SPBC16A3.12c	gi|891547859|ref|XP_013016553.1|	2.59e-94	391	Schizosaccharomyces octosporus yFS286
P6701|Iso_11447,Iso_11457,Iso_11460|II|SPBC1289.11	gi|891595784|ref|XP_013024636.1|	1.21e-92	184	Schizosaccharomyces cryophilus OY26
P6701|Iso_11447,Iso_11457,Iso_11460|II|SPBC1289.11	gi|891565492|ref|XP_013018985.1|	3.97e-90	184	Schizosaccharomyces octosporus yFS286
P6701|Iso_11447,Iso_11457,Iso_11460|II|SPBC1289.11	gi|213403838|ref|XP_002172691.1|	4.75e-67	180	Schizosaccharomyces japonicus yFS275
P6701|Iso_11447,Iso_11457,Iso_11460|II|SPBC1289.11	gi|891571645|ref|XP_013019966.1|	2.47e-18	159	Schizosaccharomyces octosporus;Schizosaccharomyces octosporus yFS286
P6701|Iso_11447,Iso_11457,Iso_11460|II|SPBC1289.11	gi|213401611|ref|XP_002171578.1|	2.89e-18	195	Schizosaccharomyces japonicus;Schizosaccharomyces japonicus yFS275
P6701|Iso_11447,Iso_11457,Iso_11460|II|SPBC1289.11	gi|213410445|ref|XP_002175992.1|	7.06e-18	158	Schizosaccharomyces japonicus;Schizosaccharomyces japonicus yFS275
P6701|Iso_11447,Iso_11457,Iso_11460|II|SPBC1289.11	gi|891581947|ref|XP_013021969.1|	1.32e-17	159	Schizosaccharomyces cryophilus OY26
P6701|Iso_11447,Iso_11457,Iso_11460|II|SPBC1289.11	gi|891584980|ref|XP_013022535.1|	3.08e-17	195	Schizosaccharomyces cryophilus OY26
P6701|Iso_11447,Iso_11457,Iso_11460|II|SPBC1289.11	gi|891560046|ref|XP_013018402.1|	3.32e-17	196	Schizosaccharomyces octosporus;Schizosaccharomyces octosporus yFS286
P6701|Iso_11447,Iso_11457,Iso_11460|II|SPBC1289.11	gi|891580557|ref|XP_013021881.1|	1.89e-15	176	Schizosaccharomyces cryophilus OY26
P6701|Iso_11447,Iso_11457,Iso_11460|II|SPBC1289.11	gi|213401431|ref|XP_002171488.1|	6.32e-15	158	Schizosaccharomyces japonicus yFS275
P6701|Iso_11447,Iso_11457,Iso_11460|II|SPBC1289.11	gi|213402153|ref|XP_002171849.1|	2.31e-13	176	Schizosaccharomyces japonicus yFS275
P6701|Iso_11447,Iso_11457,Iso_11460|II|SPBC1289.11	gi|213409147|ref|XP_002175344.1|	4.25e-13	156	Schizosaccharomyces japonicus yFS275
P6701|Iso_11447,Iso_11457,Iso_11460|II|SPBC1289.11	gi|891592698|ref|XP_013024163.1|	1.37e-12	140	Schizosaccharomyces cryophilus OY26
P6701|Iso_11447,Iso_11457,Iso_11460|II|SPBC1289.11	gi|213407004|ref|XP_002174273.1|	5.94e-12	105	Schizosaccharomyces japonicus yFS275
P6701|Iso_11447,Iso_11457,Iso_11460|II|SPBC1289.11	gi|213403037|ref|XP_002172291.1|	6.42e-12	147	Schizosaccharomyces japonicus yFS275
P6701|Iso_11447,Iso_11457,Iso_11460|II|SPBC1289.11	gi|891553951|ref|XP_013017514.1|	6.46e-12	155	Schizosaccharomyces octosporus yFS286
P6701|Iso_11447,Iso_11457,Iso_11460|II|SPBC1289.11	gi|891548260|ref|XP_013016753.1|	6.49e-12	173	Schizosaccharomyces octosporus yFS286
P6701|Iso_11447,Iso_11457,Iso_11460|II|SPBC1289.11	gi|213406349|ref|XP_002173946.1|	9.1e-12	153	Schizosaccharomyces japonicus yFS275
P6701|Iso_11447,Iso_11457,Iso_11460|II|SPBC1289.11	gi|891591308|ref|XP_013023804.1|	9.49e-12	162	Schizosaccharomyces cryophilus OY26
P6701|Iso_11447,Iso_11457,Iso_11460|II|SPBC1289.11	gi|891545174|ref|XP_013016236.1|	1.92e-11	140	Schizosaccharomyces octosporus yFS286
P6701|Iso_11447,Iso_11457,Iso_11460|II|SPBC1289.11	gi|891598967|ref|XP_013025142.1|	6.85e-11	150	Schizosaccharomyces cryophilus OY26
P6701|Iso_11447,Iso_11457,Iso_11460|II|SPBC1289.11	gi|213405955|ref|XP_002173749.1|	6.9e-11	105	Schizosaccharomyces japonicus yFS275
P6701|Iso_11447,Iso_11457,Iso_11460|II|SPBC1289.11	gi|745750351|ref|XP_002173850.2|	7.48e-11	160	Schizosaccharomyces japonicus yFS275
P6701|Iso_11447,Iso_11457,Iso_11460|II|SPBC1289.11	gi|891586357|ref|XP_013023062.1|	7.56e-11	178	Schizosaccharomyces cryophilus OY26
P6701|Iso_11447,Iso_11457,Iso_11460|II|SPBC1289.11	gi|891568283|ref|XP_013019325.1|	1.28e-10	122	Schizosaccharomyces octosporus yFS286
P6701|Iso_11447,Iso_11457,Iso_11460|II|SPBC1289.11	gi|213410599|ref|XP_002176069.1|	1.29e-10	152	Schizosaccharomyces japonicus yFS275
P6701|Iso_11447,Iso_11457,Iso_11460|II|SPBC1289.11	gi|891575692|ref|XP_013020530.1|	1.3e-10	176	Schizosaccharomyces octosporus yFS286;Schizosaccharomyces cryophilus OY26
P6701|Iso_11447,Iso_11457,Iso_11460|II|SPBC1289.11	gi|891577581|ref|XP_013021428.1|	2.89e-10	182	Schizosaccharomyces cryophilus OY26
P6701|Iso_11447,Iso_11457,Iso_11460|II|SPBC1289.11	gi|213403592|ref|XP_002172568.1|	2.89e-10	186	Schizosaccharomyces japonicus yFS275
P6701|Iso_11447,Iso_11457,Iso_11460|II|SPBC1289.11	gi|213405207|ref|XP_002173375.1|	3.39e-10	121	Schizosaccharomyces japonicus yFS275
P6701|Iso_11447,Iso_11457,Iso_11460|II|SPBC1289.11	gi|891600071|ref|XP_013025477.1|	4.18e-10	171	Schizosaccharomyces cryophilus OY26
P6701|Iso_11447,Iso_11457,Iso_11460|II|SPBC1289.11	gi|891578653|ref|XP_013020733.1|	6.14e-10	172	Schizosaccharomyces octosporus yFS286
P6701|Iso_11447,Iso_11457,Iso_11460|II|SPBC1289.11	gi|891573221|ref|XP_013020168.1|	9.14e-10	122	Schizosaccharomyces octosporus yFS286
P6701|Iso_11447,Iso_11457,Iso_11460|II|SPBC1289.11	gi|745750609|ref|XP_002171913.2|	1.07e-09	173	Schizosaccharomyces japonicus yFS275
P6701|Iso_11447,Iso_11457,Iso_11460|II|SPBC1289.11	gi|213409780|ref|XP_002175660.1|	1.35e-09	171	Schizosaccharomyces japonicus yFS275
P6701|Iso_11447,Iso_11457,Iso_11460|II|SPBC1289.11	gi|891602625|ref|XP_013025877.1|	1.78e-09	172	Schizosaccharomyces cryophilus OY26
P6701|Iso_11447,Iso_11457,Iso_11460|II|SPBC1289.11	gi|891551481|ref|XP_013017335.1|	2.17e-09	225	Schizosaccharomyces octosporus yFS286
P6701|Iso_11447,Iso_11457,Iso_11460|II|SPBC1289.11	gi|891602080|ref|XP_013025607.1|	2.26e-09	196	Schizosaccharomyces cryophilus OY26
P6701|Iso_11447,Iso_11457,Iso_11460|II|SPBC1289.11	gi|891554198|ref|XP_013017637.1|	2.37e-09	171	Schizosaccharomyces octosporus yFS286
P6701|Iso_11447,Iso_11457,Iso_11460|II|SPBC1289.11	gi|891598413|ref|XP_013025012.1|	3.06e-09	122	Schizosaccharomyces cryophilus OY26
P6701|Iso_11447,Iso_11457,Iso_11460|II|SPBC1289.11	gi|213403902|ref|XP_002172723.1|	3.08e-09	163	Schizosaccharomyces japonicus yFS275
P6701|Iso_11447,Iso_11457,Iso_11460|II|SPBC1289.11	gi|891561581|ref|XP_013018537.1|	3.69e-09	165	Schizosaccharomyces octosporus yFS286
P6701|Iso_11447,Iso_11457,Iso_11460|II|SPBC1289.11	gi|891602202|ref|XP_013025668.1|	4.64e-09	180	Schizosaccharomyces cryophilus OY26
P6701|Iso_11447,Iso_11457,Iso_11460|II|SPBC1289.11	gi|891567282|ref|XP_013019241.1|	5.9e-09	89	Schizosaccharomyces octosporus yFS286
P6701|Iso_11447,Iso_11457,Iso_11460|II|SPBC1289.11	gi|891554930|ref|XP_013017747.1|	5.94e-09	182	Schizosaccharomyces octosporus yFS286
P6701|Iso_11447,Iso_11457,Iso_11460|II|SPBC1289.11	gi|745750657|ref|XP_002171789.2|	6.01e-09	164	Schizosaccharomyces japonicus yFS275
P6701|Iso_11447,Iso_11457,Iso_11460|II|SPBC1289.11	gi|213406954|ref|XP_002174248.1|	6.5e-09	180	Schizosaccharomyces japonicus yFS275
P6701|Iso_11447,Iso_11457,Iso_11460|II|SPBC1289.11	gi|891588880|ref|XP_013023320.1|	8.14e-09	148	Schizosaccharomyces cryophilus OY26
P6701|Iso_11447,Iso_11457,Iso_11460|II|SPBC1289.11	gi|891546041|ref|XP_013016423.1|	8.65e-09	182	Schizosaccharomyces octosporus yFS286
P6701|Iso_11447,Iso_11457,Iso_11460|II|SPBC1289.11	gi|891547179|ref|XP_013016483.1|	9.15e-09	196	Schizosaccharomyces octosporus yFS286
P6701|Iso_11447,Iso_11457,Iso_11460|II|SPBC1289.11	gi|891602755|ref|XP_013025942.1|	9.5e-09	154	Schizosaccharomyces cryophilus OY26
P6701|Iso_11447,Iso_11457,Iso_11460|II|SPBC1289.11	gi|891545310|ref|XP_013016304.1|	1.54e-08	201	Schizosaccharomyces octosporus yFS286
P6701|Iso_11447,Iso_11457,Iso_11460|II|SPBC1289.11	gi|891599137|ref|XP_013025227.1|	1.6e-08	89	Schizosaccharomyces cryophilus OY26
P6701|Iso_11447,Iso_11457,Iso_11460|II|SPBC1289.11	gi|891589421|ref|XP_013023590.1|	1.87e-08	187	Schizosaccharomyces cryophilus OY26
P6701|Iso_11447,Iso_11457,Iso_11460|II|SPBC1289.11	gi|745750433|ref|XP_002174080.2|	1.95e-08	163	Schizosaccharomyces japonicus yFS275
P6701|Iso_11447,Iso_11457,Iso_11460|II|SPBC1289.11	gi|213405739|ref|XP_002173641.1|	1.99e-08	149	Schizosaccharomyces japonicus yFS275
P6701|Iso_11447,Iso_11457,Iso_11460|II|SPBC1289.11	gi|891568668|ref|XP_013019517.1|	2.39e-08	187	Schizosaccharomyces octosporus yFS286
P6701|Iso_11447,Iso_11457,Iso_11460|II|SPBC1289.11	gi|891556968|ref|XP_013017939.1|	2.78e-08	154	Schizosaccharomyces octosporus yFS286
P6701|Iso_11447,Iso_11457,Iso_11460|II|SPBC1289.11	gi|891595631|ref|XP_013024562.1|	2.96e-08	201	Schizosaccharomyces cryophilus OY26
P6701|Iso_11447,Iso_11457,Iso_11460|II|SPBC1289.11	gi|213405531|ref|XP_002173537.1|	3.37e-08	134	Schizosaccharomyces japonicus yFS275
P6701|Iso_11447,Iso_11457,Iso_11460|II|SPBC1289.11	gi|891556950|ref|XP_013017930.1|	5.49e-08	148	Schizosaccharomyces octosporus yFS286
P6701|Iso_11447,Iso_11457,Iso_11460|II|SPBC1289.11	gi|891585209|ref|XP_013022555.1|	7.45e-08	76	Schizosaccharomyces cryophilus OY26
P6701|Iso_11447,Iso_11457,Iso_11460|II|SPBC1289.11	gi|891573298|ref|XP_013020933.1|	7.69e-08	166	Schizosaccharomyces cryophilus OY26
P6701|Iso_11447,Iso_11457,Iso_11460|II|SPBC1289.11	gi|891602773|ref|XP_013025951.1|	8.36e-08	179	Schizosaccharomyces cryophilus OY26
P6701|Iso_11447,Iso_11457,Iso_11460|II|SPBC1289.11	gi|891575440|ref|XP_013021216.1|	1.16e-07	176	Schizosaccharomyces cryophilus OY26
P6701|Iso_11447,Iso_11457,Iso_11460|II|SPBC1289.11	gi|891557536|ref|XP_013018106.1|	1.4e-07	169	Schizosaccharomyces octosporus yFS286
P6701|Iso_11447,Iso_11457,Iso_11460|II|SPBC1289.11	gi|891575478|ref|XP_013020481.1|	1.51e-07	153	Schizosaccharomyces octosporus yFS286
P6701|Iso_11447,Iso_11457,Iso_11460|II|SPBC1289.11	gi|213406850|ref|XP_002174196.1|	1.83e-07	156	Schizosaccharomyces japonicus yFS275
P6701|Iso_11447,Iso_11457,Iso_11460|II|SPBC1289.11	gi|891545412|ref|XP_013016355.1|	1.94e-07	159	Schizosaccharomyces octosporus yFS286
P6701|Iso_11447,Iso_11457,Iso_11460|II|SPBC1289.11	gi|891596098|ref|XP_013024793.1|	2.02e-07	191	Schizosaccharomyces cryophilus OY26
P6701|Iso_11447,Iso_11457,Iso_11460|II|SPBC1289.11	gi|891559988|ref|XP_013018382.1|	2.07e-07	76	Schizosaccharomyces octosporus yFS286
P6701|Iso_11447,Iso_11457,Iso_11460|II|SPBC1289.11	gi|745750215|ref|XP_002173510.2|	2.29e-07	147	Schizosaccharomyces japonicus yFS275
P6701|Iso_11447,Iso_11457,Iso_11460|II|SPBC1289.11	gi|891602332|ref|XP_013025733.1|	3.19e-07	158	Schizosaccharomyces cryophilus OY26
P6701|Iso_11447,Iso_11457,Iso_11460|II|SPBC1289.11	gi|213408841|ref|XP_002175191.1|	3.21e-07	164	Schizosaccharomyces japonicus yFS275
P6701|Iso_11447,Iso_11457,Iso_11460|II|SPBC1289.11	gi|891570535|ref|XP_013019686.1|	3.37e-07	148	Schizosaccharomyces octosporus yFS286
P6701|Iso_11447,Iso_11457,Iso_11460|II|SPBC1289.11	gi|213410018|ref|XP_002175779.1|	3.39e-07	57	Schizosaccharomyces japonicus yFS275
P6701|Iso_11447,Iso_11457,Iso_11460|II|SPBC1289.11	gi|891566885|ref|XP_013019219.1|	3.98e-07	114	Schizosaccharomyces octosporus yFS286
P6701|Iso_11447,Iso_11457,Iso_11460|II|SPBC1289.11	gi|891571250|ref|XP_013019769.1|	4.4e-07	176	Schizosaccharomyces octosporus yFS286
P6701|Iso_11447,Iso_11457,Iso_11460|II|SPBC1289.11	gi|213402073|ref|XP_002171809.1|	5.65e-07	102	Schizosaccharomyces japonicus yFS275
P6701|Iso_11447,Iso_11457,Iso_11460|II|SPBC1289.11	gi|891583241|ref|XP_013022392.1|	5.87e-07	166	Schizosaccharomyces cryophilus OY26
P6701|Iso_11447,Iso_11457,Iso_11460|II|SPBC1289.11	gi|891575087|ref|XP_013021132.1|	8.3e-07	150	Schizosaccharomyces cryophilus OY26
P6701|Iso_11447,Iso_11457,Iso_11460|II|SPBC1289.11	gi|891542505|ref|XP_013015946.1|	1.13e-06	156	Schizosaccharomyces octosporus yFS286
P6701|Iso_11447,Iso_11457,Iso_11460|II|SPBC1289.11	gi|891579390|ref|XP_013021731.1|	1.43e-06	114	Schizosaccharomyces cryophilus OY26
P6701|Iso_11447,Iso_11457,Iso_11460|II|SPBC1289.11	gi|213402597|ref|XP_002172071.1|	1.45e-06	115	Schizosaccharomyces japonicus yFS275
P6701|Iso_11447,Iso_11457,Iso_11460|II|SPBC1289.11	gi|891563040|ref|XP_013018831.1|	1.48e-06	191	Schizosaccharomyces octosporus yFS286
P6701|Iso_11447,Iso_11457,Iso_11460|II|SPBC1289.11	gi|891562687|ref|XP_013018655.1|	1.76e-06	130	Schizosaccharomyces octosporus yFS286
P6701|Iso_11447,Iso_11457,Iso_11460|II|SPBC1289.11	gi|973744014|pdb|4XYH|A	1.86e-06	145	Schizosaccharomyces japonicus yFS275
P6701|Iso_11447,Iso_11457,Iso_11460|II|SPBC1289.11	gi|745752620|ref|XP_002174995.2|	1.89e-06	145	Schizosaccharomyces japonicus yFS275
P6701|Iso_11447,Iso_11457,Iso_11460|II|SPBC1289.11	gi|745752392|ref|XP_002175926.2|	1.97e-06	191	Schizosaccharomyces japonicus yFS275
P6701|Iso_11447,Iso_11457,Iso_11460|II|SPBC1289.11	gi|891599185|ref|XP_013025251.1|	2.13e-06	114	Schizosaccharomyces cryophilus OY26
P6701|Iso_11447,Iso_11457,Iso_11460|II|SPBC1289.11	gi|891573304|ref|XP_013020174.1|	2.5e-06	178	Schizosaccharomyces octosporus yFS286
P6701|Iso_11447,Iso_11457,Iso_11460|II|SPBC1289.11	gi|213401193|ref|XP_002171369.1|	2.65e-06	159	Schizosaccharomyces japonicus yFS275
P6701|Iso_11447,Iso_11457,Iso_11460|II|SPBC1289.11	gi|213403314|ref|XP_002172429.1|	3.3e-06	106	Schizosaccharomyces japonicus yFS275
P6701|Iso_11447,Iso_11457,Iso_11460|II|SPBC1289.11	gi|891571589|ref|XP_013019938.1|	3.49e-06	156	Schizosaccharomyces octosporus yFS286
P6701|Iso_11447,Iso_11457,Iso_11460|II|SPBC1289.11	gi|213402819|ref|XP_002172182.1|	3.78e-06	174	Schizosaccharomyces japonicus yFS275
P6701|Iso_11447,Iso_11457,Iso_11460|II|SPBC1289.11	gi|891542975|ref|XP_013016085.1|	4.24e-06	170	Schizosaccharomyces octosporus yFS286
P6701|Iso_11447,Iso_11457,Iso_11460|II|SPBC1289.11	gi|213410136|ref|XP_002175838.1|	5.16e-06	166	Schizosaccharomyces japonicus yFS275
P6701|Iso_11447,Iso_11457,Iso_11460|II|SPBC1289.11	gi|891551281|ref|XP_013017235.1|	5.38e-06	153	Schizosaccharomyces octosporus yFS286
P6701|Iso_11447,Iso_11457,Iso_11460|II|SPBC1289.11	gi|891582586|ref|XP_013022274.1|	8.71e-06	130	Schizosaccharomyces cryophilus OY26
P6701|Iso_11447,Iso_11457,Iso_11460|II|SPBC1289.11	gi|891584653|ref|XP_013022509.1|	8.88e-06	106	Schizosaccharomyces cryophilus OY26
P6701|Iso_11447,Iso_11457,Iso_11460|II|SPBC1289.11	gi|891562587|ref|XP_013018605.1|	1.28e-05	169	Schizosaccharomyces octosporus yFS286
P6701|Iso_11447,Iso_11457,Iso_11460|II|SPBC1289.11	gi|891593480|ref|XP_013024318.1|	1.45e-05	170	Schizosaccharomyces cryophilus OY26
P6701|Iso_11447,Iso_11457,Iso_11460|II|SPBC1289.11	gi|891601520|ref|XP_013025566.1|	1.67e-05	150	Schizosaccharomyces cryophilus OY26
P6701|Iso_11447,Iso_11457,Iso_11460|II|SPBC1289.11	gi|891564220|ref|XP_013018897.1|	1.73e-05	169	Schizosaccharomyces octosporus yFS286
P6701|Iso_11447,Iso_11457,Iso_11460|II|SPBC1289.11	gi|213410086|ref|XP_002175813.1|	1.85e-05	58	Schizosaccharomyces japonicus yFS275
P6701|Iso_11447,Iso_11457,Iso_11460|II|SPBC1289.11	gi|891547799|ref|XP_013016523.1|	2.19e-05	150	Schizosaccharomyces octosporus yFS286
P6701|Iso_11447,Iso_11457,Iso_11460|II|SPBC1289.11	gi|891568518|ref|XP_013019442.1|	2.76e-05	162	Schizosaccharomyces octosporus yFS286
P6701|Iso_11447,Iso_11457,Iso_11460|II|SPBC1289.11	gi|891589107|ref|XP_013023433.1|	2.94e-05	117	Schizosaccharomyces cryophilus OY26
P6701|Iso_11447,Iso_11457,Iso_11460|II|SPBC1289.11	gi|891595964|ref|XP_013024726.1|	3.25e-05	84	Schizosaccharomyces cryophilus OY26
P6701|Iso_11447,Iso_11457,Iso_11460|II|SPBC1289.11	gi|891574653|ref|XP_013021023.1|	3.42e-05	153	Schizosaccharomyces cryophilus OY26
P6701|Iso_11447,Iso_11457,Iso_11460|II|SPBC1289.11	gi|745750741|ref|XP_002171599.2|	3.57e-05	143	Schizosaccharomyces japonicus yFS275
P6701|Iso_11447,Iso_11457,Iso_11460|II|SPBC1289.11	gi|891582003|ref|XP_013021997.1|	3.66e-05	91	Schizosaccharomyces cryophilus OY26
P6701|Iso_11447,Iso_11457,Iso_11460|II|SPBC1289.11	gi|891560114|ref|XP_013018429.1|	3.79e-05	106	Schizosaccharomyces octosporus yFS286
P6701|Iso_11447,Iso_11457,Iso_11460|II|SPBC1289.11	gi|213409437|ref|XP_002175489.1|	3.83e-05	105	Schizosaccharomyces japonicus yFS275
P6701|Iso_11447,Iso_11457,Iso_11460|II|SPBC1289.11	gi|745750227|ref|XP_002173559.2|	4.41e-05	130	Schizosaccharomyces japonicus yFS275
P6701|Iso_11447,Iso_11457,Iso_11460|II|SPBC1289.11	gi|891554953|ref|XP_013017749.1|	4.66e-05	71	Schizosaccharomyces octosporus yFS286
P6701|Iso_11447,Iso_11457,Iso_11460|II|SPBC1289.11	gi|891577513|ref|XP_013021426.1|	5.27e-05	198	Schizosaccharomyces cryophilus OY26
P6701|Iso_11447,Iso_11457,Iso_11460|II|SPBC1289.11	gi|891585724|ref|XP_013022812.1|	7.23e-05	52	Schizosaccharomyces cryophilus OY26
P6701|Iso_11447,Iso_11457,Iso_11460|II|SPBC1289.11	gi|213401233|ref|XP_002171389.1|	8.8e-05	94	Schizosaccharomyces japonicus yFS275
P6701|Iso_11447,Iso_11457,Iso_11460|II|SPBC1289.11	gi|213402151|ref|XP_002171848.1|	0.000103	99	Schizosaccharomyces japonicus yFS275
P6701|Iso_11447,Iso_11457,Iso_11460|II|SPBC1289.11	gi|891582688|ref|XP_013022323.1|	0.000125	150	Schizosaccharomyces cryophilus OY26
P6701|Iso_11447,Iso_11457,Iso_11460|II|SPBC1289.11	gi|891551143|ref|XP_013017166.1|	0.000131	147	Schizosaccharomyces octosporus yFS286
P6701|Iso_11447,Iso_11457,Iso_11460|II|SPBC1289.11	gi|891560070|ref|XP_013018411.1|	0.000134	157	Schizosaccharomyces octosporus yFS286
P6701|Iso_11447,Iso_11457,Iso_11460|II|SPBC1289.11	gi|891551145|ref|XP_013017167.1|	0.000154	52	Schizosaccharomyces octosporus yFS286
P6701|Iso_11447,Iso_11457,Iso_11460|II|SPBC1289.11	gi|891589857|ref|XP_013023694.1|	0.000155	150	Schizosaccharomyces cryophilus OY26
P6701|Iso_11447,Iso_11457,Iso_11460|II|SPBC1289.11	gi|891592055|ref|XP_013023847.1|	0.00016	167	Schizosaccharomyces cryophilus OY26
P6701|Iso_11447,Iso_11457,Iso_11460|II|SPBC1289.11	gi|891548348|ref|XP_013016797.1|	0.000166	78	Schizosaccharomyces octosporus yFS286
P6701|Iso_11447,Iso_11457,Iso_11460|II|SPBC1289.11	gi|891584853|ref|XP_013022526.1|	0.000168	157	Schizosaccharomyces cryophilus OY26
P6701|Iso_11447,Iso_11457,Iso_11460|II|SPBC1289.11	gi|213407870|ref|XP_002174706.1|	0.000199	103	Schizosaccharomyces japonicus yFS275
P6701|Iso_11447,Iso_11457,Iso_11460|II|SPBC1289.11	gi|891600397|ref|XP_013025503.1|	0.000236	180	Schizosaccharomyces cryophilus OY26
P6701|Iso_11447,Iso_11457,Iso_11460|II|SPBC1289.11	gi|891598403|ref|XP_013025007.1|	0.000252	91	Schizosaccharomyces cryophilus OY26
P6701|Iso_11447,Iso_11457,Iso_11460|II|SPBC1289.11	gi|891548055|ref|XP_013016651.1|	0.000263	154	Schizosaccharomyces octosporus yFS286
P6701|Iso_11447,Iso_11457,Iso_11460|II|SPBC1289.11	gi|891584093|ref|XP_013022477.1|	0.000362	129	Schizosaccharomyces cryophilus OY26
P6701|Iso_11447,Iso_11457,Iso_11460|II|SPBC1289.11	gi|891599465|ref|XP_013025391.1|	0.000367	163	Schizosaccharomyces cryophilus OY26
P6701|Iso_11447,Iso_11457,Iso_11460|II|SPBC1289.11	gi|213407614|ref|XP_002174578.1|	0.000459	134	Schizosaccharomyces japonicus yFS275
P6701|Iso_11447,Iso_11457,Iso_11460|II|SPBC1289.11	gi|213407520|ref|XP_002174531.1|	0.000537	137	Schizosaccharomyces japonicus yFS275
P6701|Iso_11447,Iso_11457,Iso_11460|II|SPBC1289.11	gi|213408339|ref|XP_002174940.1|	0.000685	108	Schizosaccharomyces japonicus yFS275
P6701|Iso_11447,Iso_11457,Iso_11460|II|SPBC1289.11	gi|213409728|ref|XP_002175634.1|	0.00071	90	Schizosaccharomyces japonicus yFS275
P6701|Iso_11447,Iso_11457,Iso_11460|II|SPBC1289.11	gi|891579062|ref|XP_013021603.1|	0.000843	102	Schizosaccharomyces cryophilus OY26
P6701|Iso_11447,Iso_11457,Iso_11460|II|SPBC1289.11	gi|891598848|ref|XP_013025083.1|	0.000871	128	Schizosaccharomyces cryophilus OY26
P6701|Iso_11447,Iso_11457,Iso_11460|II|SPBC1289.11	gi|891602278|ref|XP_013025706.1|	0.001	66	Schizosaccharomyces cryophilus OY26
P6701|Iso_11447,Iso_11457,Iso_11460|II|SPBC1289.11	gi|891571887|ref|XP_013020053.1|	0.001	100	Schizosaccharomyces octosporus yFS286
P6701|Iso_11447,Iso_11457,Iso_11460|II|SPBC1289.11	gi|891559942|ref|XP_013018366.1|	0.001	180	Schizosaccharomyces octosporus yFS286
P6701|Iso_11447,Iso_11457,Iso_11460|II|SPBC1289.11	gi|891554144|ref|XP_013017610.1|	0.002	152	Schizosaccharomyces octosporus yFS286
P6701|Iso_11447,Iso_11457,Iso_11460|II|SPBC1289.11	gi|891545503|ref|XP_013016384.1|	0.002	66	Schizosaccharomyces octosporus yFS286
P6701|Iso_11447,Iso_11457,Iso_11460|II|SPBC1289.11	gi|213401529|ref|XP_002171537.1|	0.002	191	Schizosaccharomyces japonicus yFS275
P6701|Iso_11447,Iso_11457,Iso_11460|II|SPBC1289.11	gi|213404082|ref|XP_002172813.1|	0.002	153	Schizosaccharomyces japonicus yFS275
P6701|Iso_11447,Iso_11457,Iso_11460|II|SPBC1289.11	gi|213402329|ref|XP_002171937.1|	0.002	111	Schizosaccharomyces japonicus yFS275
P6701|Iso_11447,Iso_11457,Iso_11460|II|SPBC1289.11	gi|213402329|ref|XP_002171937.1|	0.002	169	Schizosaccharomyces japonicus yFS275
P6701|Iso_11447,Iso_11457,Iso_11460|II|SPBC1289.11	gi|891566833|ref|XP_013019216.1|	0.002	89	Schizosaccharomyces octosporus yFS286
P6701|Iso_11447,Iso_11457,Iso_11460|II|SPBC1289.11	gi|891574603|ref|XP_013020257.1|	0.002	83	Schizosaccharomyces octosporus yFS286
P6701|Iso_11447,Iso_11457,Iso_11460|II|SPBC1289.11	gi|745752076|ref|XP_002174296.2|	0.002	57	Schizosaccharomyces japonicus yFS275
P6701|Iso_11447,Iso_11457,Iso_11460|II|SPBC1289.11	gi|213406085|ref|XP_002173814.1|	0.002	105	Schizosaccharomyces japonicus yFS275
P6701|Iso_11447,Iso_11457,Iso_11460|II|SPBC1289.11	gi|891571491|ref|XP_013019889.1|	0.003	119	Schizosaccharomyces octosporus yFS286
P6701|Iso_11447,Iso_11457,Iso_11460|II|SPBC1289.11	gi|891599191|ref|XP_013025254.1|	0.003	89	Schizosaccharomyces cryophilus OY26
P6701|Iso_11447,Iso_11457,Iso_11460|II|SPBC1289.11	gi|213405211|ref|XP_002173377.1|	0.003	71	Schizosaccharomyces japonicus yFS275
P6701|Iso_11447,Iso_11457,Iso_11460|II|SPBC1289.11	gi|745754170|ref|XP_002173023.2|	0.003	97	Schizosaccharomyces japonicus yFS275
P6701|Iso_11447,Iso_11457,Iso_11460|II|SPBC1289.11	gi|213403400|ref|XP_002172472.1|	0.004	160	Schizosaccharomyces japonicus yFS275
P6701|Iso_11447,Iso_11457,Iso_11460|II|SPBC1289.11	gi|891597029|ref|XP_013024923.1|	0.004	84	Schizosaccharomyces cryophilus OY26
P6701|Iso_11447,Iso_11457,Iso_11460|II|SPBC1289.11	gi|891592367|ref|XP_013024003.1|	0.005	69	Schizosaccharomyces cryophilus OY26
P6701|Iso_11447,Iso_11457,Iso_11460|II|SPBC1289.11	gi|745754032|ref|XP_002172761.2|	0.006	191	Schizosaccharomyces japonicus yFS275
P6701|Iso_11447,Iso_11457,Iso_11460|II|SPBC1289.11	gi|891582108|ref|XP_013022048.1|	0.006	119	Schizosaccharomyces cryophilus OY26
P6701|Iso_11447,Iso_11457,Iso_11460|II|SPBC1289.11	gi|891568468|ref|XP_013019417.1|	0.007	49	Schizosaccharomyces octosporus yFS286
P6701|Iso_11447,Iso_11457,Iso_11460|II|SPBC1289.11	gi|891560284|ref|XP_013018460.1|	0.007	129	Schizosaccharomyces octosporus yFS286
P6701|Iso_11447,Iso_11457,Iso_11460|II|SPBC1289.11	gi|891562725|ref|XP_013018674.1|	0.007	68	Schizosaccharomyces octosporus yFS286
P6701|Iso_11447,Iso_11457,Iso_11460|II|SPBC1289.11	gi|213408875|ref|XP_002175208.1|	0.008	167	Schizosaccharomyces japonicus yFS275
P6701|Iso_11447,Iso_11457,Iso_11460|II|SPBC1289.11	gi|891576494|ref|XP_013021375.1|	0.009	130	Schizosaccharomyces cryophilus OY26
P6701|Iso_11447,Iso_11457,Iso_11460|II|SPBC1289.11	gi|213406377|ref|XP_002173960.1|	0.011	128	Schizosaccharomyces japonicus yFS275
P6701|Iso_11447,Iso_11457,Iso_11460|II|SPBC1289.11	gi|891553949|ref|XP_013017513.1|	0.011	171	Schizosaccharomyces octosporus yFS286
P6701|Iso_11447,Iso_11457,Iso_11460|II|SPBC1289.11	gi|891557186|ref|XP_013018048.1|	0.011	74	Schizosaccharomyces octosporus yFS286
P6701|Iso_11447,Iso_11457,Iso_11460|II|SPBC1289.11	gi|213405277|ref|XP_002173410.1|	0.011	72	Schizosaccharomyces japonicus yFS275
P6701|Iso_11447,Iso_11457,Iso_11460|II|SPBC1289.11	gi|213408523|ref|XP_002175032.1|	0.014	119	Schizosaccharomyces japonicus yFS275
P6701|Iso_11447,Iso_11457,Iso_11460|II|SPBC1289.11	gi|745754074|ref|XP_002172823.2|	0.014	69	Schizosaccharomyces japonicus yFS275
P6701|Iso_11447,Iso_11457,Iso_11460|II|SPBC1289.11	gi|213402843|ref|XP_002172194.1|	0.019	112	Schizosaccharomyces japonicus yFS275
P6701|Iso_11447,Iso_11457,Iso_11460|II|SPBC1289.11	gi|891543136|ref|XP_013016097.1|	0.024	83	Schizosaccharomyces octosporus yFS286
P6701|Iso_11447,Iso_11457,Iso_11460|II|SPBC1289.11	gi|213409263|ref|XP_002175402.1|	0.026	162	Schizosaccharomyces japonicus yFS275
P6701|Iso_11447,Iso_11457,Iso_11460|II|SPBC1289.11	gi|891568189|ref|XP_013019278.1|	0.027	67	Schizosaccharomyces octosporus yFS286
P6701|Iso_11447,Iso_11457,Iso_11460|II|SPBC1289.11	gi|213402241|ref|XP_002171893.1|	0.031	74	Schizosaccharomyces japonicus yFS275
P6701|Iso_11447,Iso_11457,Iso_11460|II|SPBC1289.11	gi|891558278|ref|XP_013018148.1|	0.034	96	Schizosaccharomyces octosporus yFS286
P6701|Iso_11447,Iso_11457,Iso_11460|II|SPBC1289.11	gi|891550170|ref|XP_013016948.1|	0.035	76	Schizosaccharomyces octosporus yFS286
P6701|Iso_11447,Iso_11457,Iso_11460|II|SPBC1289.11	gi|891548075|ref|XP_013016661.1|	0.035	110	Schizosaccharomyces octosporus yFS286
P6701|Iso_11447,Iso_11457,Iso_11460|II|SPBC1289.11	gi|891576220|ref|XP_013020588.1|	0.035	103	Schizosaccharomyces octosporus yFS286
P6701|Iso_11447,Iso_11457,Iso_11460|II|SPBC1289.11	gi|891543558|ref|XP_013016115.1|	0.035	71	Schizosaccharomyces octosporus yFS286
P6701|Iso_11447,Iso_11457,Iso_11460|II|SPBC1289.11	gi|891589907|ref|XP_013023705.1|	0.036	122	Schizosaccharomyces cryophilus OY26
P6701|Iso_11447,Iso_11457,Iso_11460|II|SPBC1289.11	gi|891592059|ref|XP_013023849.1|	0.044	120	Schizosaccharomyces cryophilus OY26
P6701|Iso_11447,Iso_11457,Iso_11460|II|SPBC1289.11	gi|891572530|ref|XP_013020875.1|	0.044	74	Schizosaccharomyces cryophilus OY26
P6701|Iso_11447,Iso_11457,Iso_11460|II|SPBC1289.11	gi|891593301|ref|XP_013024306.1|	0.045	85	Schizosaccharomyces cryophilus OY26
P6701|Iso_11447,Iso_11457,Iso_11460|II|SPBC1289.11	gi|891555868|ref|XP_013017801.1|	0.046	81	Schizosaccharomyces octosporus yFS286
P6841|Iso_11720|III|SPCC794.07	gi|891599433|ref|XP_013025375.1|	7.75e-172	300	Schizosaccharomyces cryophilus OY26
P6841|Iso_11720|III|SPCC794.07	gi|891565715|ref|XP_013019096.1|	2.86e-171	314	Schizosaccharomyces octosporus yFS286
P6841|Iso_11720|III|SPCC794.07	gi|213405199|ref|XP_002173371.1|	2.26e-159	316	Schizosaccharomyces japonicus yFS275
P6841|Iso_11720|III|SPCC794.07	gi|213407116|ref|XP_002174329.1|	2.06e-35	256	Schizosaccharomyces japonicus yFS275
P6841|Iso_11720|III|SPCC794.07	gi|891557148|ref|XP_013018029.1|	1.62e-30	273	Schizosaccharomyces octosporus yFS286
P6841|Iso_11720|III|SPCC794.07	gi|891572327|ref|XP_013020857.1|	3.76e-30	252	Schizosaccharomyces cryophilus OY26
P6911|Iso_11825,Iso_11826|III|SPCC1682.03c	gi|891599351|ref|XP_013025334.1|	1.18e-35	112	Schizosaccharomyces cryophilus OY26
P6911|Iso_11825,Iso_11826|III|SPCC1682.03c	gi|891565795|ref|XP_013019136.1|	3.67e-33	112	Schizosaccharomyces octosporus yFS286
P6911|Iso_11825,Iso_11826|III|SPCC1682.03c	gi|213404460|ref|XP_002173002.1|	2.4e-31	119	Schizosaccharomyces japonicus yFS275
P7258|Iso_12434|III|SPCC16A11.16c	gi|891598936|ref|XP_013025127.1|	1.95e-46	154	Schizosaccharomyces cryophilus OY26
P7258|Iso_12434|III|SPCC16A11.16c	gi|891568313|ref|XP_013019340.1|	1.7e-42	172	Schizosaccharomyces octosporus yFS286
P7258|Iso_12434|III|SPCC16A11.16c	gi|213409119|ref|XP_002175330.1|	3.2e-21	121	Schizosaccharomyces japonicus yFS275
P7434|Iso_12735|III|SPCC645.14c	gi|891569394|ref|XP_013019605.1|	1.07e-24	50	Schizosaccharomyces octosporus yFS286
P7434|Iso_12735|III|SPCC645.14c	gi|891595441|ref|XP_013024467.1|	2.91e-24	50	Schizosaccharomyces cryophilus OY26
P7434|Iso_12735|III|SPCC645.14c	gi|213408162|ref|XP_002174852.1|	7.9e-22	50	Schizosaccharomyces japonicus yFS275
P7522|Iso_12898|III|SPCC11E10.07c	gi|891592105|ref|XP_013023872.1|	0	290	Schizosaccharomyces cryophilus OY26
P7522|Iso_12898|III|SPCC11E10.07c	gi|891548400|ref|XP_013016823.1|	0	290	Schizosaccharomyces octosporus yFS286
P7522|Iso_12898|III|SPCC11E10.07c	gi|213408086|ref|XP_002174814.1|	0	290	Schizosaccharomyces japonicus yFS275
P7522|Iso_12898|III|SPCC11E10.07c	gi|891592259|ref|XP_013023949.1|	1.77e-17	237	Schizosaccharomyces cryophilus OY26
P7522|Iso_12898|III|SPCC11E10.07c	gi|213404108|ref|XP_002172826.1|	6.76e-16	194	Schizosaccharomyces japonicus yFS275
P7522|Iso_12898|III|SPCC11E10.07c	gi|891549060|ref|XP_013016894.1|	4.27e-15	200	Schizosaccharomyces octosporus yFS286
P7522|Iso_12898|III|SPCC11E10.07c	gi|891602312|ref|XP_013025723.1|	5.89e-15	189	Schizosaccharomyces cryophilus OY26
P7522|Iso_12898|III|SPCC11E10.07c	gi|891545436|ref|XP_013016367.1|	2.89e-14	192	Schizosaccharomyces octosporus yFS286
P7522|Iso_12898|III|SPCC11E10.07c	gi|213405491|ref|XP_002173517.1|	6.31e-13	203	Schizosaccharomyces japonicus yFS275
P7522|Iso_12898|III|SPCC11E10.07c	gi|891571316|ref|XP_013019802.1|	8.49e-13	295	Schizosaccharomyces octosporus yFS286
P7522|Iso_12898|III|SPCC11E10.07c	gi|891575570|ref|XP_013021249.1|	3.64e-11	177	Schizosaccharomyces cryophilus OY26
P7522|Iso_12898|III|SPCC11E10.07c	gi|213407962|ref|XP_002174752.1|	9.33e-11	263	Schizosaccharomyces japonicus yFS275
P7548|Iso_12945|III|SPCC188.09c	gi|213401519|ref|XP_002171532.1|	1.23e-126	409	Schizosaccharomyces japonicus yFS275
P7548|Iso_12945|III|SPCC188.09c	gi|213404860|ref|XP_002173202.1|	1.21e-103	409	Schizosaccharomyces japonicus yFS275
P7548|Iso_12945|III|SPCC188.09c	gi|213408369|ref|XP_002174955.1|	6.31e-70	448	Schizosaccharomyces japonicus yFS275
P7548|Iso_12945|III|SPCC188.09c	gi|745753792|ref|XP_002175806.2|	5.65e-23	176	Schizosaccharomyces japonicus yFS275
P7548|Iso_12945|III|SPCC188.09c	gi|745753794|ref|XP_002175803.2|	3.23e-22	176	Schizosaccharomyces japonicus yFS275
P7548|Iso_12945|III|SPCC188.09c	gi|891559649|ref|XP_013018220.1|	3.39e-20	222	Schizosaccharomyces octosporus yFS286
P7548|Iso_12945|III|SPCC188.09c	gi|891551076|ref|XP_013017133.1|	1.52e-15	155	Schizosaccharomyces octosporus yFS286
P7548|Iso_12945|III|SPCC188.09c	gi|891585537|ref|XP_013022719.1|	2.82e-05	147	Schizosaccharomyces cryophilus OY26
P7548|Iso_12945|III|SPCC188.09c	gi|891585790|ref|XP_013022845.1|	0.002	97	Schizosaccharomyces cryophilus OY26
P7585|Iso_12998,Iso_13001,Iso_13003|III|SPCC162.04c	gi|891550880|ref|XP_013017035.1|	0.001	43	Schizosaccharomyces octosporus yFS286
P7585|Iso_12998,Iso_13001,Iso_13003|III|SPCC162.04c	gi|891575063|ref|XP_013020373.1|	0.003	46	Schizosaccharomyces octosporus yFS286
P7585|Iso_12998,Iso_13001,Iso_13003|III|SPCC162.04c	gi|891542475|ref|XP_013015931.1|	0.008	43	Schizosaccharomyces octosporus yFS286
P7585|Iso_12998,Iso_13001,Iso_13003|III|SPCC162.04c	gi|891569967|ref|XP_013019649.1|	0.012	54	Schizosaccharomyces octosporus yFS286
P7592|Iso_13012|III|SPCC13B11.01	gi|891592203|ref|XP_013023921.1|	6.15e-170	275	Schizosaccharomyces cryophilus OY26
P7592|Iso_13012|III|SPCC13B11.01	gi|891548661|ref|XP_013016868.1|	4.42e-163	268	Schizosaccharomyces octosporus yFS286
P7592|Iso_13012|III|SPCC13B11.01	gi|213403780|ref|XP_002172662.1|	8.81e-162	275	Schizosaccharomyces japonicus yFS275
P7592|Iso_13012|III|SPCC13B11.01	gi|891590899|ref|XP_013023779.1|	4.03e-138	273	Schizosaccharomyces cryophilus OY26
P7592|Iso_13012|III|SPCC13B11.01	gi|745752092|ref|XP_002174356.2|	6.02e-138	274	Schizosaccharomyces japonicus yFS275
P7592|Iso_13012|III|SPCC13B11.01	gi|213406734|ref|XP_002174138.1|	8.19e-21	292	Schizosaccharomyces japonicus yFS275
P7592|Iso_13012|III|SPCC13B11.01	gi|213404874|ref|XP_002173209.1|	2.18e-20	282	Schizosaccharomyces japonicus yFS275
P7592|Iso_13012|III|SPCC13B11.01	gi|891561317|ref|XP_013018527.1|	1.96e-16	304	Schizosaccharomyces octosporus yFS286
P7592|Iso_13012|III|SPCC13B11.01	gi|891555786|ref|XP_013017794.1|	1.19e-13	281	Schizosaccharomyces octosporus yFS286
P7592|Iso_13012|III|SPCC13B11.01	gi|891583329|ref|XP_013022402.1|	1.91e-13	304	Schizosaccharomyces cryophilus OY26
P7592|Iso_13012|III|SPCC13B11.01	gi|891574817|ref|XP_013020313.1|	7.28e-13	283	Schizosaccharomyces octosporus yFS286
P7592|Iso_13012|III|SPCC13B11.01	gi|891560104|ref|XP_013018424.1|	7.88e-12	153	Schizosaccharomyces octosporus yFS286
P7592|Iso_13012|III|SPCC13B11.01	gi|891555728|ref|XP_013017793.1|	6.5e-11	160	Schizosaccharomyces octosporus yFS286
P7592|Iso_13012|III|SPCC13B11.01	gi|891576613|ref|XP_013021383.1|	8.34e-11	127	Schizosaccharomyces cryophilus OY26
P7592|Iso_13012|III|SPCC13B11.01	gi|891576651|ref|XP_013021384.1|	4.45e-10	159	Schizosaccharomyces cryophilus OY26
P7592|Iso_13012|III|SPCC13B11.01	gi|891560106|ref|XP_013018425.1|	5.49e-10	87	Schizosaccharomyces octosporus yFS286
P7592|Iso_13012|III|SPCC13B11.01	gi|891575118|ref|XP_013020387.1|	5.9e-10	197	Schizosaccharomyces octosporus yFS286
P7592|Iso_13012|III|SPCC13B11.01	gi|891584734|ref|XP_013022513.1|	1.15e-09	151	Schizosaccharomyces cryophilus OY26
P7592|Iso_13012|III|SPCC13B11.01	gi|213407702|ref|XP_002174622.1|	1.45e-09	119	Schizosaccharomyces japonicus yFS275
P7592|Iso_13012|III|SPCC13B11.01	gi|891589068|ref|XP_013023414.1|	2.63e-09	194	Schizosaccharomyces cryophilus OY26
P7592|Iso_13012|III|SPCC13B11.01	gi|213403872|ref|XP_002172708.1|	4.74e-09	289	Schizosaccharomyces japonicus yFS275
P7592|Iso_13012|III|SPCC13B11.01	gi|213401515|ref|XP_002171530.1|	1.06e-07	157	Schizosaccharomyces japonicus yFS275
P7592|Iso_13012|III|SPCC13B11.01	gi|745752564|ref|XP_002175184.2|	3.4e-05	319	Schizosaccharomyces japonicus yFS275
P7592|Iso_13012|III|SPCC13B11.01	gi|891590718|ref|XP_013023765.1|	0.000638	70	Schizosaccharomyces cryophilus OY26
P7592|Iso_13012|III|SPCC13B11.01	gi|891578823|ref|XP_013021544.1|	0.001	70	Schizosaccharomyces cryophilus OY26
P7592|Iso_13012|III|SPCC13B11.01	gi|891572568|ref|XP_013020117.1|	0.001	122	Schizosaccharomyces octosporus yFS286
P7592|Iso_13012|III|SPCC13B11.01	gi|891572481|ref|XP_013020111.1|	0.002	70	Schizosaccharomyces octosporus yFS286
P7592|Iso_13012|III|SPCC13B11.01	gi|891574729|ref|XP_013020293.1|	0.007	56	Schizosaccharomyces octosporus yFS286
P7592|Iso_13012|III|SPCC13B11.01	gi|891578799|ref|XP_013021538.1|	0.013	66	Schizosaccharomyces cryophilus OY26
P7603|Iso_13023|III|SPCC13B11.01	gi|213403780|ref|XP_002172662.1|	4.6e-103	184	Schizosaccharomyces japonicus yFS275
P7603|Iso_13023|III|SPCC13B11.01	gi|891592203|ref|XP_013023921.1|	1.89e-101	184	Schizosaccharomyces cryophilus OY26
P7603|Iso_13023|III|SPCC13B11.01	gi|891548661|ref|XP_013016868.1|	2.72e-99	184	Schizosaccharomyces octosporus yFS286
P7603|Iso_13023|III|SPCC13B11.01	gi|891590899|ref|XP_013023779.1|	1.35e-84	182	Schizosaccharomyces cryophilus OY26
P7603|Iso_13023|III|SPCC13B11.01	gi|745752092|ref|XP_002174356.2|	7.64e-83	183	Schizosaccharomyces japonicus yFS275
P7603|Iso_13023|III|SPCC13B11.01	gi|213404874|ref|XP_002173209.1|	9.35e-10	183	Schizosaccharomyces japonicus yFS275
P7603|Iso_13023|III|SPCC13B11.01	gi|891574817|ref|XP_013020313.1|	5.87e-09	188	Schizosaccharomyces octosporus yFS286
P7603|Iso_13023|III|SPCC13B11.01	gi|891561317|ref|XP_013018527.1|	1.23e-08	192	Schizosaccharomyces octosporus yFS286
P7603|Iso_13023|III|SPCC13B11.01	gi|891555786|ref|XP_013017794.1|	1.02e-07	187	Schizosaccharomyces octosporus yFS286
P7603|Iso_13023|III|SPCC13B11.01	gi|891583329|ref|XP_013022402.1|	1.29e-06	192	Schizosaccharomyces cryophilus OY26
P7603|Iso_13023|III|SPCC13B11.01	gi|891560104|ref|XP_013018424.1|	4.02e-06	59	Schizosaccharomyces octosporus yFS286
P7603|Iso_13023|III|SPCC13B11.01	gi|891560106|ref|XP_013018425.1|	5.78e-06	59	Schizosaccharomyces octosporus yFS286
P7603|Iso_13023|III|SPCC13B11.01	gi|891584734|ref|XP_013022513.1|	1.05e-05	59	Schizosaccharomyces cryophilus OY26
P7603|Iso_13023|III|SPCC13B11.01	gi|891576613|ref|XP_013021383.1|	1.77e-05	78	Schizosaccharomyces cryophilus OY26
P7603|Iso_13023|III|SPCC13B11.01	gi|213407702|ref|XP_002174622.1|	0.00013	72	Schizosaccharomyces japonicus yFS275
P7603|Iso_13023|III|SPCC13B11.01	gi|891575118|ref|XP_013020387.1|	0.00047	149	Schizosaccharomyces octosporus yFS286
P7603|Iso_13023|III|SPCC13B11.01	gi|213403872|ref|XP_002172708.1|	0.000765	71	Schizosaccharomyces japonicus yFS275
P7603|Iso_13023|III|SPCC13B11.01	gi|891590718|ref|XP_013023765.1|	0.001	56	Schizosaccharomyces cryophilus OY26
P7603|Iso_13023|III|SPCC13B11.01	gi|891572481|ref|XP_013020111.1|	0.001	56	Schizosaccharomyces octosporus yFS286
P7603|Iso_13023|III|SPCC13B11.01	gi|891578823|ref|XP_013021544.1|	0.002	56	Schizosaccharomyces cryophilus OY26
P7603|Iso_13023|III|SPCC13B11.01	gi|891578799|ref|XP_013021538.1|	0.003	66	Schizosaccharomyces cryophilus OY26
P7603|Iso_13023|III|SPCC13B11.01	gi|891589068|ref|XP_013023414.1|	0.003	146	Schizosaccharomyces cryophilus OY26
P7603|Iso_13023|III|SPCC13B11.01	gi|891572568|ref|XP_013020117.1|	0.004	66	Schizosaccharomyces octosporus yFS286
P7603|Iso_13023|III|SPCC13B11.01	gi|891574729|ref|XP_013020293.1|	0.004	56	Schizosaccharomyces octosporus yFS286
P7606|Iso_13026|III|SPCC13B11.01	gi|213403780|ref|XP_002172662.1|	3.91e-95	158	Schizosaccharomyces japonicus yFS275
P7606|Iso_13026|III|SPCC13B11.01	gi|891592203|ref|XP_013023921.1|	4.71e-92	158	Schizosaccharomyces cryophilus OY26
P7606|Iso_13026|III|SPCC13B11.01	gi|891548661|ref|XP_013016868.1|	1.36e-90	158	Schizosaccharomyces octosporus yFS286
P7606|Iso_13026|III|SPCC13B11.01	gi|891590899|ref|XP_013023779.1|	7.59e-81	156	Schizosaccharomyces cryophilus OY26
P7606|Iso_13026|III|SPCC13B11.01	gi|745752092|ref|XP_002174356.2|	2.33e-77	157	Schizosaccharomyces japonicus yFS275
P7606|Iso_13026|III|SPCC13B11.01	gi|891561317|ref|XP_013018527.1|	4e-07	162	Schizosaccharomyces octosporus yFS286
P7606|Iso_13026|III|SPCC13B11.01	gi|213404874|ref|XP_002173209.1|	1.66e-05	162	Schizosaccharomyces japonicus yFS275
P7606|Iso_13026|III|SPCC13B11.01	gi|891583329|ref|XP_013022402.1|	0.000172	164	Schizosaccharomyces cryophilus OY26
P7606|Iso_13026|III|SPCC13B11.01	gi|891574817|ref|XP_013020313.1|	0.000701	162	Schizosaccharomyces octosporus yFS286
P7606|Iso_13026|III|SPCC13B11.01	gi|213403872|ref|XP_002172708.1|	0.000765	47	Schizosaccharomyces japonicus yFS275
P7606|Iso_13026|III|SPCC13B11.01	gi|891555786|ref|XP_013017794.1|	0.013	161	Schizosaccharomyces octosporus yFS286
P7662|Iso_13096|III|SPCC663.01c	gi|891592177|ref|XP_013023908.1|	9.26e-16	93	Schizosaccharomyces cryophilus OY26
P7662|Iso_13096|III|SPCC663.01c	gi|891548504|ref|XP_013016856.1|	9.62e-16	93	Schizosaccharomyces octosporus yFS286
P7662|Iso_13096|III|SPCC663.01c	gi|213409914|ref|XP_002175727.1|	4.54e-06	55	Schizosaccharomyces japonicus yFS275
P7664|Iso_13098|III|SPCC663.01c	gi|891592177|ref|XP_013023908.1|	6.48e-16	93	Schizosaccharomyces cryophilus OY26
P7664|Iso_13098|III|SPCC663.01c	gi|891548504|ref|XP_013016856.1|	8.15e-16	93	Schizosaccharomyces octosporus yFS286
P7664|Iso_13098|III|SPCC663.01c	gi|213409914|ref|XP_002175727.1|	5.86e-06	55	Schizosaccharomyces japonicus yFS275
P7705|Iso_13162|III|SPCC417.09c	gi|891586829|ref|XP_013023106.1|	2.99e-62	611	Schizosaccharomyces cryophilus OY26
P7705|Iso_13162|III|SPCC417.09c	gi|213406267|ref|XP_002173905.1|	5.93e-59	458	Schizosaccharomyces japonicus yFS275
P7705|Iso_13162|III|SPCC417.09c	gi|891578135|ref|XP_013020690.1|	5.01e-58	463	Schizosaccharomyces octosporus yFS286
P7705|Iso_13162|III|SPCC417.09c	gi|213407812|ref|XP_002174677.1|	4.33e-48	665	Schizosaccharomyces japonicus yFS275
P7705|Iso_13162|III|SPCC417.09c	gi|891568612|ref|XP_013019489.1|	2.99e-45	636	Schizosaccharomyces octosporus yFS286
P7705|Iso_13162|III|SPCC417.09c	gi|891589363|ref|XP_013023561.1|	1.18e-43	633	Schizosaccharomyces cryophilus OY26
P7705|Iso_13162|III|SPCC417.09c	gi|891554118|ref|XP_013017597.1|	1.49e-16	701	Schizosaccharomyces octosporus yFS286
P7705|Iso_13162|III|SPCC417.09c	gi|891600628|ref|XP_013025519.1|	1.25e-14	504	Schizosaccharomyces cryophilus OY26
P7705|Iso_13162|III|SPCC417.09c	gi|213404994|ref|XP_002173269.1|	1.23e-13	512	Schizosaccharomyces japonicus yFS275
P7705|Iso_13162|III|SPCC417.09c	gi|891600580|ref|XP_013025516.1|	1.59e-13	597	Schizosaccharomyces cryophilus OY26
P7705|Iso_13162|III|SPCC417.09c	gi|891596022|ref|XP_013024755.1|	2.24e-13	547	Schizosaccharomyces cryophilus OY26
P7705|Iso_13162|III|SPCC417.09c	gi|745754150|ref|XP_002172983.2|	8.13e-13	646	Schizosaccharomyces japonicus yFS275
P7705|Iso_13162|III|SPCC417.09c	gi|891563692|ref|XP_013018870.1|	1.27e-11	541	Schizosaccharomyces octosporus yFS286
P7705|Iso_13162|III|SPCC417.09c	gi|891597027|ref|XP_013024922.1|	1.39e-10	603	Schizosaccharomyces cryophilus OY26
P7705|Iso_13162|III|SPCC417.09c	gi|213405681|ref|XP_002173612.1|	6.01e-10	487	Schizosaccharomyces japonicus yFS275
P7705|Iso_13162|III|SPCC417.09c	gi|891571178|ref|XP_013019733.1|	9.47e-10	422	Schizosaccharomyces octosporus yFS286
P7705|Iso_13162|III|SPCC417.09c	gi|891595780|ref|XP_013024634.1|	1.19e-09	402	Schizosaccharomyces cryophilus OY26
P7705|Iso_13162|III|SPCC417.09c	gi|891572624|ref|XP_013020122.1|	8.79e-09	541	Schizosaccharomyces octosporus yFS286
P7705|Iso_13162|III|SPCC417.09c	gi|891565496|ref|XP_013018987.1|	2.03e-06	127	Schizosaccharomyces octosporus yFS286
P7705|Iso_13162|III|SPCC417.09c	gi|891578781|ref|XP_013021533.1|	2.98e-06	210	Schizosaccharomyces cryophilus OY26
P7705|Iso_13162|III|SPCC417.09c	gi|891554112|ref|XP_013017594.1|	6.47e-06	211	Schizosaccharomyces octosporus yFS286
P7705|Iso_13162|III|SPCC417.09c	gi|891574607|ref|XP_013020258.1|	5.09e-05	396	Schizosaccharomyces octosporus yFS286
P7705|Iso_13162|III|SPCC417.09c	gi|891576964|ref|XP_013020633.1|	0.000217	43	Schizosaccharomyces octosporus yFS286
P7705|Iso_13162|III|SPCC417.09c	gi|213410234|ref|XP_002175887.1|	0.000345	58	Schizosaccharomyces japonicus yFS275
P7705|Iso_13162|III|SPCC417.09c	gi|891587723|ref|XP_013023165.1|	0.00059	43	Schizosaccharomyces cryophilus OY26
P7705|Iso_13162|III|SPCC417.09c	gi|891587725|ref|XP_013023166.1|	0.000593	43	Schizosaccharomyces cryophilus OY26
P7705|Iso_13162|III|SPCC417.09c	gi|213405000|ref|XP_002173272.1|	0.003	55	Schizosaccharomyces japonicus yFS275
P7705|Iso_13162|III|SPCC417.09c	gi|891575278|ref|XP_013021179.1|	0.003	354	Schizosaccharomyces cryophilus OY26
P7705|Iso_13162|III|SPCC417.09c	gi|891572407|ref|XP_013020106.1|	0.004	37	Schizosaccharomyces octosporus yFS286
P7705|Iso_13162|III|SPCC417.09c	gi|891578843|ref|XP_013021549.1|	0.004	37	Schizosaccharomyces cryophilus OY26
P7705|Iso_13162|III|SPCC417.09c	gi|745751986|ref|XP_011048988.1|	0.004	47	Schizosaccharomyces japonicus yFS275
P7705|Iso_13162|III|SPCC417.09c	gi|891543128|ref|XP_013016093.1|	0.004	377	Schizosaccharomyces octosporus yFS286
P7705|Iso_13162|III|SPCC417.09c	gi|891549194|ref|XP_013016901.1|	0.005	63	Schizosaccharomyces octosporus yFS286
P7705|Iso_13162|III|SPCC417.09c	gi|891574737|ref|XP_013020296.1|	0.007	93	Schizosaccharomyces octosporus yFS286
P7705|Iso_13162|III|SPCC417.09c	gi|745750317|ref|XP_002173777.2|	0.007	72	Schizosaccharomyces japonicus yFS275
P7705|Iso_13162|III|SPCC417.09c	gi|891593352|ref|XP_013024310.1|	0.009	272	Schizosaccharomyces cryophilus OY26
P7705|Iso_13162|III|SPCC417.09c	gi|745750819|ref|XP_002171338.2|	0.01	208	Schizosaccharomyces japonicus yFS275
P7705|Iso_13162|III|SPCC417.09c	gi|891592273|ref|XP_013023956.1|	0.01	63	Schizosaccharomyces cryophilus OY26
P7705|Iso_13162|III|SPCC417.09c	gi|745750189|ref|XP_002173362.2|	0.011	47	Schizosaccharomyces japonicus yFS275
P7705|Iso_13162|III|SPCC417.09c	gi|213405159|ref|XP_002173351.1|	0.016	43	Schizosaccharomyces japonicus yFS275
P7705|Iso_13162|III|SPCC417.09c	gi|891547927|ref|XP_013016587.1|	0.023	56	Schizosaccharomyces octosporus yFS286
P7705|Iso_13162|III|SPCC417.09c	gi|213401795|ref|XP_002171670.1|	0.024	33	Schizosaccharomyces japonicus yFS275
P7705|Iso_13162|III|SPCC417.09c	gi|745753715|ref|XP_011049025.1|	0.025	47	Schizosaccharomyces japonicus yFS275
P7705|Iso_13162|III|SPCC417.09c	gi|891542398|ref|XP_013015893.1|	0.028	58	Schizosaccharomyces octosporus yFS286
P7705|Iso_13162|III|SPCC417.09c	gi|745752012|ref|XP_002174131.2|	0.033	43	Schizosaccharomyces japonicus yFS275
P7705|Iso_13162|III|SPCC417.09c	gi|891574843|ref|XP_013020318.1|	0.035	48	Schizosaccharomyces octosporus yFS286
P7705|Iso_13162|III|SPCC417.09c	gi|745752006|ref|XP_002174116.2|	0.044	47	Schizosaccharomyces japonicus yFS275
P7760|Iso_13247|III|SPCC285.07c	gi|891583691|ref|XP_013022445.1|	0.005	68	Schizosaccharomyces cryophilus OY26
P7909|Iso_13505|III|SPCC576.08c	gi|891591574|ref|XP_013023824.1|	2.01e-94	137	Schizosaccharomyces cryophilus OY26
P7909|Iso_13505|III|SPCC576.08c	gi|891548302|ref|XP_013016774.1|	1.64e-93	137	Schizosaccharomyces octosporus yFS286
P7909|Iso_13505|III|SPCC576.08c	gi|213409604|ref|XP_002175572.1|	1.24e-81	137	Schizosaccharomyces japonicus yFS275
P8060|Iso_13775|III|SPCC1919.11	gi|891590180|ref|XP_013023728.1|	6.32e-81	301	Schizosaccharomyces cryophilus OY26
P8060|Iso_13775|III|SPCC1919.11	gi|891548116|ref|XP_013016681.1|	7.51e-74	297	Schizosaccharomyces octosporus yFS286
P8060|Iso_13775|III|SPCC1919.11	gi|745752028|ref|XP_002174178.2|	6.49e-39	294	Schizosaccharomyces japonicus yFS275
P8060|Iso_13775|III|SPCC1919.11	gi|891589395|ref|XP_013023577.1|	7.19e-12	171	Schizosaccharomyces cryophilus OY26
P8060|Iso_13775|III|SPCC1919.11	gi|891568642|ref|XP_013019504.1|	2.56e-10	148	Schizosaccharomyces octosporus yFS286
P8060|Iso_13775|III|SPCC1919.11	gi|213402629|ref|XP_002172087.1|	3.94e-09	88	Schizosaccharomyces japonicus yFS275
P8060|Iso_13775|III|SPCC1919.11	gi|891602422|ref|XP_013025776.1|	1.81e-07	62	Schizosaccharomyces cryophilus OY26
P8060|Iso_13775|III|SPCC1919.11	gi|891552863|ref|XP_013017434.1|	1.02e-06	81	Schizosaccharomyces octosporus yFS286
P8060|Iso_13775|III|SPCC1919.11	gi|891571382|ref|XP_013019835.1|	5.54e-06	84	Schizosaccharomyces octosporus yFS286
P8060|Iso_13775|III|SPCC1919.11	gi|891595850|ref|XP_013024669.1|	4.62e-05	60	Schizosaccharomyces cryophilus OY26
P8060|Iso_13775|III|SPCC1919.11	gi|891577694|ref|XP_013020675.1|	5.23e-05	74	Schizosaccharomyces octosporus yFS286
P8060|Iso_13775|III|SPCC1919.11	gi|891575682|ref|XP_013021281.1|	9.24e-05	62	Schizosaccharomyces cryophilus OY26
P8060|Iso_13775|III|SPCC1919.11	gi|891562597|ref|XP_013018610.1|	0.000105	58	Schizosaccharomyces octosporus yFS286
P8060|Iso_13775|III|SPCC1919.11	gi|891565424|ref|XP_013018951.1|	0.00019	59	Schizosaccharomyces octosporus yFS286
P8060|Iso_13775|III|SPCC1919.11	gi|213406005|ref|XP_002173774.1|	0.000219	62	Schizosaccharomyces japonicus yFS275
P8060|Iso_13775|III|SPCC1919.11	gi|745753870|ref|XP_002175576.2|	0.000269	98	Schizosaccharomyces japonicus yFS275
P8060|Iso_13775|III|SPCC1919.11	gi|891586371|ref|XP_013023063.1|	0.000729	63	Schizosaccharomyces cryophilus OY26
P8060|Iso_13775|III|SPCC1919.11	gi|891578647|ref|XP_013020732.1|	0.001	63	Schizosaccharomyces octosporus yFS286
P8060|Iso_13775|III|SPCC1919.11	gi|213406235|ref|XP_002173889.1|	0.002	67	Schizosaccharomyces japonicus yFS275
P8060|Iso_13775|III|SPCC1919.11	gi|891587035|ref|XP_013023121.1|	0.002	101	Schizosaccharomyces cryophilus OY26
P8060|Iso_13775|III|SPCC1919.11	gi|891582674|ref|XP_013022318.1|	0.003	59	Schizosaccharomyces cryophilus OY26
P8060|Iso_13775|III|SPCC1919.11	gi|891542555|ref|XP_013015971.1|	0.003	61	Schizosaccharomyces octosporus yFS286
P8060|Iso_13775|III|SPCC1919.11	gi|745752260|ref|XP_002174734.2|	0.004	61	Schizosaccharomyces japonicus yFS275
P8060|Iso_13775|III|SPCC1919.11	gi|745752182|ref|XP_002174530.2|	0.005	59	Schizosaccharomyces japonicus yFS275
P8060|Iso_13775|III|SPCC1919.11	gi|891585549|ref|XP_013022725.1|	0.005	60	Schizosaccharomyces cryophilus OY26
P8060|Iso_13775|III|SPCC1919.11	gi|891579336|ref|XP_013021704.1|	0.006	61	Schizosaccharomyces cryophilus OY26
P8060|Iso_13775|III|SPCC1919.11	gi|891578669|ref|XP_013020737.1|	0.009	62	Schizosaccharomyces octosporus yFS286
P8060|Iso_13775|III|SPCC1919.11	gi|213408703|ref|XP_002175122.1|	0.01	54	Schizosaccharomyces japonicus yFS275
P8060|Iso_13775|III|SPCC1919.11	gi|213402929|ref|XP_002172237.1|	0.012	120	Schizosaccharomyces japonicus yFS275
P8060|Iso_13775|III|SPCC1919.11	gi|213409660|ref|XP_002175600.1|	0.016	73	Schizosaccharomyces japonicus yFS275
P8060|Iso_13775|III|SPCC1919.11	gi|745752556|ref|XP_002175198.2|	0.022	61	Schizosaccharomyces japonicus yFS275
P8060|Iso_13775|III|SPCC1919.11	gi|891595369|ref|XP_013024431.1|	0.022	111	Schizosaccharomyces cryophilus OY26
P8122|Iso_13894,Iso_13898|III|SPCC70.06	gi|891599654|ref|XP_013025438.1|	3.78e-88	238	Schizosaccharomyces cryophilus OY26
P8122|Iso_13894,Iso_13898|III|SPCC70.06	gi|891565592|ref|XP_013019035.1|	7.04e-82	228	Schizosaccharomyces octosporus yFS286
P8122|Iso_13894,Iso_13898|III|SPCC70.06	gi|213409948|ref|XP_002175744.1|	5.56e-43	223	Schizosaccharomyces japonicus yFS275
P8122|Iso_13894,Iso_13898|III|SPCC70.06	gi|213409598|ref|XP_002175569.1|	2.92e-38	217	Schizosaccharomyces japonicus yFS275
P8122|Iso_13894,Iso_13898|III|SPCC70.06	gi|891591568|ref|XP_013023821.1|	4.61e-34	176	Schizosaccharomyces cryophilus OY26
P8122|Iso_13894,Iso_13898|III|SPCC70.06	gi|891548296|ref|XP_013016771.1|	7.69e-32	189	Schizosaccharomyces octosporus yFS286
P9219|Iso_se_16287|I|SPAC23C11.04c	gi|891587206|ref|XP_013023135.1|	8.86e-17	56	Schizosaccharomyces cryophilus OY26
P9219|Iso_se_16287|I|SPAC23C11.04c	gi|891577511|ref|XP_013020661.1|	3.36e-16	56	Schizosaccharomyces octosporus yFS286
P9219|Iso_se_16287|I|SPAC23C11.04c	gi|213406209|ref|XP_002173876.1|	3.66e-12	55	Schizosaccharomyces japonicus yFS275
P9316|Iso_se_16483|I|SPAC13G7.11	gi|891576206|ref|XP_013020585.1|	2.27e-20	74	Schizosaccharomyces octosporus yFS286
P9316|Iso_se_16483|I|SPAC13G7.11	gi|891588668|ref|XP_013023214.1|	2.94e-17	74	Schizosaccharomyces cryophilus OY26
P9316|Iso_se_16483|I|SPAC13G7.11	gi|213404760|ref|XP_002173152.1|	0.002	77	Schizosaccharomyces japonicus yFS275
P9422|Iso_se_16700|I|SPAC23H3.08c	gi|891582554|ref|XP_013022258.1|	1.68e-116	210	Schizosaccharomyces cryophilus OY26
P9422|Iso_se_16700|I|SPAC23H3.08c	gi|891562719|ref|XP_013018671.1|	5.33e-115	215	Schizosaccharomyces octosporus yFS286
P9422|Iso_se_16700|I|SPAC23H3.08c	gi|213405767|ref|XP_002173655.1|	6.81e-84	214	Schizosaccharomyces japonicus yFS275
P9422|Iso_se_16700|I|SPAC23H3.08c	gi|213409437|ref|XP_002175489.1|	5.26e-38	225	Schizosaccharomyces japonicus yFS275
P9422|Iso_se_16700|I|SPAC23H3.08c	gi|891560114|ref|XP_013018429.1|	1.22e-31	184	Schizosaccharomyces octosporus yFS286
P9422|Iso_se_16700|I|SPAC23H3.08c	gi|891584653|ref|XP_013022509.1|	4.24e-31	191	Schizosaccharomyces cryophilus OY26
P9422|Iso_se_16700|I|SPAC23H3.08c	gi|213405955|ref|XP_002173749.1|	2.82e-05	58	Schizosaccharomyces japonicus yFS275
P9422|Iso_se_16700|I|SPAC23H3.08c	gi|891589421|ref|XP_013023590.1|	3.83e-05	95	Schizosaccharomyces cryophilus OY26
P9422|Iso_se_16700|I|SPAC23H3.08c	gi|891568668|ref|XP_013019517.1|	3.97e-05	95	Schizosaccharomyces octosporus yFS286
P9422|Iso_se_16700|I|SPAC23H3.08c	gi|213403037|ref|XP_002172291.1|	8.04e-05	187	Schizosaccharomyces japonicus yFS275
P9422|Iso_se_16700|I|SPAC23H3.08c	gi|213408769|ref|XP_002175155.1|	0.000154	71	Schizosaccharomyces japonicus yFS275
P9422|Iso_se_16700|I|SPAC23H3.08c	gi|213403592|ref|XP_002172568.1|	0.000258	82	Schizosaccharomyces japonicus yFS275
P9422|Iso_se_16700|I|SPAC23H3.08c	gi|213410018|ref|XP_002175779.1|	0.000346	85	Schizosaccharomyces japonicus yFS275
P9422|Iso_se_16700|I|SPAC23H3.08c	gi|891565628|ref|XP_013019053.1|	0.000732	67	Schizosaccharomyces octosporus yFS286
P9422|Iso_se_16700|I|SPAC23H3.08c	gi|891557536|ref|XP_013018106.1|	0.001	58	Schizosaccharomyces octosporus yFS286
P9422|Iso_se_16700|I|SPAC23H3.08c	gi|891573298|ref|XP_013020933.1|	0.001	58	Schizosaccharomyces cryophilus OY26
P9422|Iso_se_16700|I|SPAC23H3.08c	gi|891567282|ref|XP_013019241.1|	0.002	56	Schizosaccharomyces octosporus yFS286
P9422|Iso_se_16700|I|SPAC23H3.08c	gi|891599519|ref|XP_013025418.1|	0.003	67	Schizosaccharomyces cryophilus OY26
P9422|Iso_se_16700|I|SPAC23H3.08c	gi|891602755|ref|XP_013025942.1|	0.003	67	Schizosaccharomyces cryophilus OY26
P9422|Iso_se_16700|I|SPAC23H3.08c	gi|891599137|ref|XP_013025227.1|	0.003	56	Schizosaccharomyces cryophilus OY26
P9422|Iso_se_16700|I|SPAC23H3.08c	gi|891556968|ref|XP_013017939.1|	0.004	43	Schizosaccharomyces octosporus yFS286
P9422|Iso_se_16700|I|SPAC23H3.08c	gi|213402351|ref|XP_002171948.1|	0.004	60	Schizosaccharomyces japonicus yFS275
P9422|Iso_se_16700|I|SPAC23H3.08c	gi|891586357|ref|XP_013023062.1|	0.006	109	Schizosaccharomyces cryophilus OY26
P9422|Iso_se_16700|I|SPAC23H3.08c	gi|213410599|ref|XP_002176069.1|	0.007	195	Schizosaccharomyces japonicus yFS275
P9422|Iso_se_16700|I|SPAC23H3.08c	gi|213403314|ref|XP_002172429.1|	0.011	94	Schizosaccharomyces japonicus yFS275
P9422|Iso_se_16700|I|SPAC23H3.08c	gi|213408841|ref|XP_002175191.1|	0.018	117	Schizosaccharomyces japonicus yFS275
P9422|Iso_se_16700|I|SPAC23H3.08c	gi|891561581|ref|XP_013018537.1|	0.02	119	Schizosaccharomyces octosporus yFS286
P9422|Iso_se_16700|I|SPAC23H3.08c	gi|891598413|ref|XP_013025012.1|	0.022	59	Schizosaccharomyces cryophilus OY26
P9422|Iso_se_16700|I|SPAC23H3.08c	gi|891580596|ref|XP_013021882.1|	0.023	58	Schizosaccharomyces cryophilus OY26
P9422|Iso_se_16700|I|SPAC23H3.08c	gi|213402073|ref|XP_002171809.1|	0.025	56	Schizosaccharomyces japonicus yFS275
P9422|Iso_se_16700|I|SPAC23H3.08c	gi|891573221|ref|XP_013020168.1|	0.032	43	Schizosaccharomyces octosporus yFS286
P9422|Iso_se_16700|I|SPAC23H3.08c	gi|891584980|ref|XP_013022535.1|	0.033	189	Schizosaccharomyces cryophilus OY26
P9422|Iso_se_16700|I|SPAC23H3.08c	gi|891583241|ref|XP_013022392.1|	0.036	70	Schizosaccharomyces cryophilus OY26
P9422|Iso_se_16700|I|SPAC23H3.08c	gi|891543136|ref|XP_013016097.1|	0.037	72	Schizosaccharomyces octosporus yFS286
P9422|Iso_se_16700|I|SPAC23H3.08c	gi|973744014|pdb|4XYH|A	0.046	137	Schizosaccharomyces japonicus yFS275
P9422|Iso_se_16700|I|SPAC23H3.08c	gi|891584853|ref|XP_013022526.1|	0.048	79	Schizosaccharomyces cryophilus OY26
P9422|Iso_se_16700|I|SPAC23H3.08c	gi|745752620|ref|XP_002174995.2|	0.049	149	Schizosaccharomyces japonicus yFS275
P10698|Iso_se_19368|I|SPAC22E12.10c	gi|891584362|ref|XP_013022491.1|	1.89e-59	93	Schizosaccharomyces cryophilus OY26
P10698|Iso_se_19368|I|SPAC22E12.10c	gi|891560162|ref|XP_013018446.1|	6.67e-59	93	Schizosaccharomyces octosporus yFS286
P10698|Iso_se_19368|I|SPAC22E12.10c	gi|213409469|ref|XP_002175505.1|	2.25e-43	91	Schizosaccharomyces japonicus yFS275
P12379|Iso_se_22932|II|SPBC2A9.09	gi|891573897|ref|XP_013020968.1|	6.02e-49	116	Schizosaccharomyces cryophilus OY26
P12379|Iso_se_22932|II|SPBC2A9.09	gi|891558124|ref|XP_013018141.1|	1.4e-48	114	Schizosaccharomyces octosporus yFS286
P12379|Iso_se_22932|II|SPBC2A9.09	gi|213402129|ref|XP_002171837.1|	2.85e-40	123	Schizosaccharomyces japonicus yFS275
P12379|Iso_se_22932|II|SPBC2A9.09	gi|745753685|ref|XP_011049010.1|	2.7e-05	125	Schizosaccharomyces japonicus yFS275
P12379|Iso_se_22932|II|SPBC2A9.09	gi|745750621|ref|XP_002171889.2|	0.031	63	Schizosaccharomyces japonicus yFS275
P12379|Iso_se_22932|II|SPBC2A9.09	gi|891592487|ref|XP_013024063.1|	0.033	128	Schizosaccharomyces cryophilus OY26
P12530|Iso_se_23239|II|SPBC776.17	gi|891594408|ref|XP_013024374.1|	8.25e-57	121	Schizosaccharomyces cryophilus OY26
P12530|Iso_se_23239|II|SPBC776.17	gi|891557142|ref|XP_013018026.1|	8.34e-53	121	Schizosaccharomyces octosporus yFS286
P12530|Iso_se_23239|II|SPBC776.17	gi|213407968|ref|XP_002174755.1|	2.52e-42	121	Schizosaccharomyces japonicus yFS275
P12792|Iso_se_23792|II|SPBP8B7.25	gi|891571166|ref|XP_013019727.1|	2.74e-13	52	Schizosaccharomyces octosporus yFS286
P12792|Iso_se_23792|II|SPBP8B7.25	gi|745750257|ref|XP_002173619.2|	3.7e-10	47	Schizosaccharomyces japonicus yFS275
P12792|Iso_se_23792|II|SPBP8B7.25	gi|891575254|ref|XP_013021173.1|	1.02e-09	52	Schizosaccharomyces cryophilus OY26
P12792|Iso_se_23792|II|SPBP8B7.25	gi|213407936|ref|XP_002174739.1|	0.005	34	Schizosaccharomyces japonicus yFS275
P12792|Iso_se_23792|II|SPBP8B7.25	gi|891592704|ref|XP_013024166.1|	0.023	31	Schizosaccharomyces cryophilus OY26
P12792|Iso_se_23792|II|SPBP8B7.25	gi|213407254|ref|XP_002174398.1|	0.034	39	Schizosaccharomyces japonicus yFS275
P14291|Iso_se_26999|III|SPCC569.03	gi|891582265|ref|XP_013022126.1|	2.93e-22	120	Schizosaccharomyces cryophilus OY26
P14291|Iso_se_26999|III|SPCC569.03	gi|891582422|ref|XP_013022192.1|	1.16e-21	133	Schizosaccharomyces cryophilus OY26
P14291|Iso_se_26999|III|SPCC569.03	gi|891574689|ref|XP_013020280.1|	1.49e-21	118	Schizosaccharomyces octosporus yFS286
P14291|Iso_se_26999|III|SPCC569.03	gi|891574865|ref|XP_013020324.1|	4.64e-21	129	Schizosaccharomyces octosporus yFS286
P14291|Iso_se_26999|III|SPCC569.03	gi|891575978|ref|XP_013021332.1|	6.06e-21	118	Schizosaccharomyces cryophilus OY26
P14291|Iso_se_26999|III|SPCC569.03	gi|891599796|ref|XP_013025454.1|	9.61e-21	118	Schizosaccharomyces cryophilus OY26
P14291|Iso_se_26999|III|SPCC569.03	gi|891576086|ref|XP_013021343.1|	1.51e-20	129	Schizosaccharomyces cryophilus OY26
P14291|Iso_se_26999|III|SPCC569.03	gi|891589447|ref|XP_013023603.1|	2.72e-20	113	Schizosaccharomyces cryophilus OY26
P14291|Iso_se_26999|III|SPCC569.03	gi|891589532|ref|XP_013023642.1|	2.62e-16	167	Schizosaccharomyces cryophilus OY26
P14291|Iso_se_26999|III|SPCC569.03	gi|891582233|ref|XP_013022110.1|	4.91e-16	74	Schizosaccharomyces cryophilus OY26
P14291|Iso_se_26999|III|SPCC569.03	gi|891585940|ref|XP_013022920.1|	3.57e-13	159	Schizosaccharomyces cryophilus OY26
P14291|Iso_se_26999|III|SPCC569.03	gi|891576269|ref|XP_013021359.1|	2.09e-10	176	Schizosaccharomyces cryophilus OY26
P14291|Iso_se_26999|III|SPCC569.03	gi|891565528|ref|XP_013019003.1|	2.53e-10	116	Schizosaccharomyces octosporus yFS286
P14291|Iso_se_26999|III|SPCC569.03	gi|891582444|ref|XP_013022203.1|	5.09e-10	92	Schizosaccharomyces cryophilus OY26
P14291|Iso_se_26999|III|SPCC569.03	gi|891595744|ref|XP_013024616.1|	8.65e-10	100	Schizosaccharomyces cryophilus OY26
P14291|Iso_se_26999|III|SPCC569.03	gi|891575795|ref|XP_013021310.1|	8.19e-09	93	Schizosaccharomyces cryophilus OY26
P14291|Iso_se_26999|III|SPCC569.03	gi|891586004|ref|XP_013022952.1|	1.72e-08	94	Schizosaccharomyces cryophilus OY26
P14291|Iso_se_26999|III|SPCC569.03	gi|891582088|ref|XP_013022038.1|	4.23e-07	93	Schizosaccharomyces cryophilus OY26
P56|Iso_109,Iso_110|I|SPAC24B11.06c	gi|557996351|gb|EST05869.1|	3.46e-81	143	Pseudozyma brasiliensis GHG001
P56|Iso_109,Iso_110|I|SPAC24B11.06c	gi|808374694|ref|XP_012192281.1|	3.47e-81	143	Pseudozyma hubeiensis SY62
P56|Iso_109,Iso_110|I|SPAC24B11.06c	gi|573027628|gb|ETS60865.1|	3.47e-81	143	Pseudozyma aphidis DSM 70725
P56|Iso_109,Iso_110|I|SPAC24B11.06c	gi|343427568|emb|CBQ71095.1|	3.62e-81	143	Sporisorium reilianum SRZ2
P56|Iso_109,Iso_110|I|SPAC24B11.06c	gi|955494717|ref|XP_014657669.1|	3.7e-81	143	Pseudozyma antarctica;Ustilago hordei
P56|Iso_109,Iso_110|I|SPAC24B11.06c	gi|758977225|ref|XP_011388664.1|	3.74e-81	143	Ustilago maydis 521
P56|Iso_109,Iso_110|I|SPAC24B11.06c	gi|673530245|emb|CDI56475.1|	5.12e-81	143	Melanopsichium pennsylvanicum 4
P56|Iso_109,Iso_110|I|SPAC24B11.06c	gi|914975253|ref|XP_013244017.1|	9.65e-81	143	Tilletiaria anomala UBC 951
P56|Iso_109,Iso_110|I|SPAC24B11.06c	gi|628267968|ref|XP_007730678.1|	1.13e-80	141	Capronia epimyces CBS 606.96
P56|Iso_109,Iso_110|I|SPAC24B11.06c	gi|858056140|emb|CDR99841.1|	1.17e-80	140	Sporisorium scitamineum
P56|Iso_109,Iso_110|I|SPAC24B11.06c	gi|630961990|ref|XP_007877403.1|	1.21e-80	143	Pseudozyma flocculosa PF-1
P56|Iso_109,Iso_110|I|SPAC24B11.06c	gi|628214741|ref|XP_007719368.1|	1.45e-80	141	Capronia coronata CBS 617.96
P56|Iso_109,Iso_110|I|SPAC24B11.06c	gi|684168798|ref|XP_009158270.1|	2.71e-80	141	Exophiala dermatitidis NIH/UT8656
P56|Iso_109,Iso_110|I|SPAC24B11.06c	gi|915067653|ref|XP_013272879.1|	3.4e-80	141	Rhinocladiella mackenziei CBS 650.93
P56|Iso_109,Iso_110|I|SPAC24B11.06c	gi|813216647|dbj|GAO45989.1|	6.48e-80	143	Saitoella complicata NRRL Y-17804
P56|Iso_109,Iso_110|I|SPAC24B11.06c	gi|472582731|gb|EMS20402.1|	7.04e-80	141	Rhodosporidium toruloides;Rhodosporidium toruloides NP11
P56|Iso_109,Iso_110|I|SPAC24B11.06c	gi|915145356|ref|XP_013309727.1|	7.46e-80	140	Exophiala xenobiotica
P56|Iso_109,Iso_110|I|SPAC24B11.06c	gi|915145363|ref|XP_013309728.1|	1.08e-79	140	Exophiala xenobiotica
P56|Iso_109,Iso_110|I|SPAC24B11.06c	gi|501752814|emb|CCG83352.1|	1.09e-79	141	Taphrina deformans PYCC 5710
P56|Iso_109,Iso_110|I|SPAC24B11.06c	gi|915070776|ref|XP_013260419.1|	1.36e-79	141	Exophiala aquamarina CBS 119918
P56|Iso_109,Iso_110|I|SPAC24B11.06c	gi|443895128|dbj|GAC72474.1|	1.78e-79	143	Pseudozyma antarctica T-34
P56|Iso_109,Iso_110|I|SPAC24B11.06c	gi|915078167|ref|XP_013282565.1|	2e-79	141	Cladophialophora immunda;Fonsecaea pedrosoi CBS 271.37;Fonsecaea multimorphosa CBS 102226
P56|Iso_109,Iso_110|I|SPAC24B11.06c	gi|628322311|ref|XP_007742706.1|	2.11e-79	141	Cladophialophora psammophila CBS 110553;Cladophialophora bantiana CBS 173.52
P56|Iso_109,Iso_110|I|SPAC24B11.06c	gi|983145832|gb|KWU43806.1|	3.82e-79	140	Rhodotorula sp. JG-1b
P56|Iso_109,Iso_110|I|SPAC24B11.06c	gi|671380084|ref|XP_008719931.1|	5.29e-79	140	Cyphellophora europaea CBS 101466
P56|Iso_109,Iso_110|I|SPAC24B11.06c	gi|317137240|ref|XP_003190034.1|	5.73e-79	144	Aspergillus oryzae;Aspergillus oryzae RIB40;Aspergillus oryzae 3.042;Aspergillus oryzae 100-8;Aspergillus flavus AF70;Aspergillus parasiticus SU-1
P56|Iso_109,Iso_110|I|SPAC24B11.06c	gi|557724744|dbj|GAD96553.1|	5.85e-79	140	Byssochlamys spectabilis No. 5
P56|Iso_109,Iso_110|I|SPAC24B11.06c	gi|671163051|ref|XP_008721992.1|	6.92e-79	140	Capronia semiimmersa;Cladophialophora carrionii CBS 160.54
P56|Iso_109,Iso_110|I|SPAC24B11.06c	gi|628275733|ref|XP_007752568.1|	8.59e-79	140	Cladophialophora yegresii CBS 114405
P56|Iso_109,Iso_110|I|SPAC24B11.06c	gi|759220834|gb|KIV98171.1|	1.1e-78	141	Exophiala mesophila
P56|Iso_109,Iso_110|I|SPAC24B11.06c	gi|759297217|gb|KIW73631.1|	1.11e-78	140	Capronia semiimmersa
P56|Iso_109,Iso_110|I|SPAC24B11.06c	gi|121808010|sp|Q2WFL5.1|HOG1_COCMI	1.26e-78	143	Bipolaris oryzae
P56|Iso_109,Iso_110|I|SPAC24B11.06c	gi|358371924|dbj|GAA88530.1|	1.48e-78	140	Aspergillus kawachii IFO 4308
P56|Iso_109,Iso_110|I|SPAC24B11.06c	gi|627914701|ref|XP_007691143.1|	1.5e-78	143	Bipolaris oryzae ATCC 44560
P56|Iso_109,Iso_110|I|SPAC24B11.06c	gi|966765947|dbj|GAQ41803.1|	1.52e-78	140	Aspergillus niger
P56|Iso_109,Iso_110|I|SPAC24B11.06c	gi|317030507|ref|XP_001392702.2|	1.61e-78	140	Aspergillus niger ATCC 1015;Aspergillus niger CBS 513.88
P56|Iso_109,Iso_110|I|SPAC24B11.06c	gi|759203639|gb|KIV81059.1|	1.84e-78	140	Exophiala sideris
P56|Iso_109,Iso_110|I|SPAC24B11.06c	gi|759203638|gb|KIV81058.1|	1.9e-78	140	Exophiala sideris
P56|Iso_109,Iso_110|I|SPAC24B11.06c	gi|930444672|gb|KPI43226.1|	2.01e-78	140	Phialophora attae
P56|Iso_109,Iso_110|I|SPAC24B11.06c	gi|939610021|gb|KPV72053.1|	2.6e-78	144	Rhodotorula graminis WP1
P56|Iso_109,Iso_110|I|SPAC24B11.06c	gi|629633544|ref|XP_007785418.1|	3.09e-78	140	Endocarpon pusillum Z07020
P56|Iso_109,Iso_110|I|SPAC24B11.06c	gi|212532181|ref|XP_002146247.1|	3.15e-78	140	Talaromyces marneffei;Talaromyces marneffei ATCC 18224
P56|Iso_109,Iso_110|I|SPAC24B11.06c	gi|582955215|gb|EWC43468.1|	6.07e-78	140	Drechslerella stenobrocha 248
P56|Iso_109,Iso_110|I|SPAC24B11.06c	gi|628199840|ref|XP_007710641.1|	8.36e-78	139	Bipolaris zeicola 26-R-13;Bipolaris victoriae FI3
P56|Iso_109,Iso_110|I|SPAC24B11.06c	gi|628074267|ref|XP_007701787.1|	8.42e-78	139	Bipolaris sorokiniana ND90Pr
P56|Iso_109,Iso_110|I|SPAC24B11.06c	gi|814540911|emb|CEQ41762.1|	8.53e-78	140	Sporidiobolus salmonicolor
P56|Iso_109,Iso_110|I|SPAC24B11.06c	gi|748481006|ref|XP_011106668.1|	1.16e-77	140	Dactylellina haptotyla CBS 200.50
P56|Iso_109,Iso_110|I|SPAC24B11.06c	gi|748516746|ref|XP_011124806.1|	1.21e-77	140	Arthrobotrys oligospora ATCC 24927
P56|Iso_109,Iso_110|I|SPAC24B11.06c	gi|242774963|ref|XP_002478549.1|	1.66e-77	140	Talaromyces stipitatus ATCC 10500
P56|Iso_109,Iso_110|I|SPAC24B11.06c	gi|953455535|ref|XP_014571320.1|	1.75e-77	144	Mixia osmundae IAM 14324
P56|Iso_109,Iso_110|I|SPAC24B11.06c	gi|358060523|dbj|GAA93928.1|	1.79e-77	144	Mixia osmundae IAM 14324
P56|Iso_109,Iso_110|I|SPAC24B11.06c	gi|757342058|gb|KIR47996.1|	1.89e-77	144	Cryptococcus gattii CA1280;Cryptococcus gattii CA1873
P56|Iso_109,Iso_110|I|SPAC24B11.06c	gi|928514330|ref|XP_014075962.1|	1.93e-77	139	Bipolaris maydis;Bipolaris maydis ATCC 48331;Bipolaris maydis C5
P56|Iso_109,Iso_110|I|SPAC24B11.06c	gi|939394381|emb|CEH19385.1|	2.01e-77	140	Ceraceosorus bombacis
P56|Iso_109,Iso_110|I|SPAC24B11.06c	gi|321252852|ref|XP_003192542.1|	2.13e-77	144	Cryptococcus gattii R265;Cryptococcus gattii WM276;Cryptococcus gattii CBS 10090;Cryptococcus gattii E566;Cryptococcus gattii EJB2;Cryptococcus gattii 99/473;Cryptococcus gattii LA55;Cryptococcus gattii CA1014;Cryptococcus gattii NT-10;Cryptococcus gattii Ram5;Cryptococcus gattii Ru294;Cryptococcus gattii MMRL2647;Cryptococcus gattii 2001/935-1
P56|Iso_109,Iso_110|I|SPAC24B11.06c	gi|757381529|gb|KIR86877.1|	2.18e-77	144	Cryptococcus gattii IND107
P56|Iso_109,Iso_110|I|SPAC24B11.06c	gi|759239529|gb|KIW16473.1|	2.65e-77	140	Exophiala spinifera
P56|Iso_109,Iso_110|I|SPAC24B11.06c	gi|667829746|ref|XP_007779042.1|	2.88e-77	144	Coniosporium apollinis CBS 100218
P56|Iso_109,Iso_110|I|SPAC24B11.06c	gi|58265586|ref|XP_569949.1|	2.95e-77	144	Cryptococcus neoformans var. grubii;Cryptococcus neoformans var. neoformans JEC21;Cryptococcus neoformans var. grubii H99;Cryptococcus neoformans var. neoformans B-3501A
P56|Iso_109,Iso_110|I|SPAC24B11.06c	gi|615422297|ref|XP_007587092.1|	4.03e-77	141	Macrophomina phaseolina MS6;Neofusicoccum parvum UCRNP2
P56|Iso_109,Iso_110|I|SPAC24B11.06c	gi|924120520|emb|CUA71934.1|	4.87e-77	138	Rhizoctonia solani
P56|Iso_109,Iso_110|I|SPAC24B11.06c	gi|759269173|gb|KIW45693.1|	5.08e-77	140	Exophiala oligosperma
P56|Iso_109,Iso_110|I|SPAC24B11.06c	gi|821064599|gb|KKY19867.1|	5.82e-77	139	Diplodia seriata
P56|Iso_109,Iso_110|I|SPAC24B11.06c	gi|225557957|gb|EEH06242.1|	6.12e-77	140	Ajellomyces capsulatus G186AR
P56|Iso_109,Iso_110|I|SPAC24B11.06c	gi|816188744|emb|CRG89691.1|	6.28e-77	140	Talaromyces islandicus
P56|Iso_109,Iso_110|I|SPAC24B11.06c	gi|915126033|ref|XP_013322788.1|	6.86e-77	144	Rasamsonia emersonii CBS 393.64
P56|Iso_109,Iso_110|I|SPAC24B11.06c	gi|20522016|gb|AAM26267.1|	7.15e-77	144	Cryptococcus neoformans var. neoformans
P56|Iso_109,Iso_110|I|SPAC24B11.06c	gi|821073369|gb|KKY28295.1|	7.2e-77	141	Phaeomoniella chlamydospora
P56|Iso_109,Iso_110|I|SPAC24B11.06c	gi|759269172|gb|KIW45692.1|	7.55e-77	140	Exophiala oligosperma
P56|Iso_109,Iso_110|I|SPAC24B11.06c	gi|589278576|ref|XP_007005018.1|	9.28e-77	140	Tremella mesenterica DSM 1558
P56|Iso_109,Iso_110|I|SPAC24B11.06c	gi|121701399|ref|XP_001268964.1|	9.36e-77	140	Aspergillus clavatus NRRL 1
P56|Iso_109,Iso_110|I|SPAC24B11.06c	gi|759269171|gb|KIW45691.1|	1.01e-76	140	Exophiala oligosperma
P56|Iso_109,Iso_110|I|SPAC24B11.06c	gi|751833799|emb|CEL59118.1|	1.04e-76	138	Rhizoctonia solani AG-1 IB
P56|Iso_109,Iso_110|I|SPAC24B11.06c	gi|634347569|gb|KDE03086.1|	1.05e-76	140	Microbotryum violaceum p1A1 Lamole
P56|Iso_109,Iso_110|I|SPAC24B11.06c	gi|154271632|ref|XP_001536669.1|	1.15e-76	140	Ajellomyces capsulatus NAm1;Ajellomyces capsulatus H88;Ajellomyces capsulatus H143
P56|Iso_109,Iso_110|I|SPAC24B11.06c	gi|19577355|emb|CAD28436.1|	2.47e-76	140	Aspergillus fumigatus
P56|Iso_109,Iso_110|I|SPAC24B11.06c	gi|636589573|ref|XP_008026125.1|	2.66e-76	143	Setosphaeria turcica Et28A
P56|Iso_109,Iso_110|I|SPAC24B11.06c	gi|70995818|ref|XP_752664.1|	2.83e-76	140	Aspergillus fumigatus Af293;Aspergillus fumigatus A1163;Aspergillus fumigatus Z5;Aspergillus fumigatus var. RP-2014
P56|Iso_109,Iso_110|I|SPAC24B11.06c	gi|327350911|gb|EGE79768.1|	2.93e-76	143	Ajellomyces dermatitidis ATCC 26199;Ajellomyces dermatitidis ATCC 18188
P56|Iso_109,Iso_110|I|SPAC24B11.06c	gi|849268561|dbj|GAO89010.1|	3.09e-76	140	Neosartorya udagawae
P56|Iso_109,Iso_110|I|SPAC24B11.06c	gi|425767609|gb|EKV06178.1|	3.72e-76	140	Penicillium digitatum;Penicillium digitatum PHI26
P56|Iso_109,Iso_110|I|SPAC24B11.06c	gi|752347915|gb|KIO06976.1|	4.05e-76	144	Pisolithus tinctorius Marx 270
P56|Iso_109,Iso_110|I|SPAC24B11.06c	gi|50553949|ref|XP_504383.1|	4.18e-76	139	Yarrowia lipolytica CLIB122
P56|Iso_109,Iso_110|I|SPAC24B11.06c	gi|816343894|gb|KKK20975.1|	4.2e-76	140	Aspergillus rambellii
P56|Iso_109,Iso_110|I|SPAC24B11.06c	gi|119495366|ref|XP_001264469.1|	4.46e-76	140	Neosartorya fischeri NRRL 181
P56|Iso_109,Iso_110|I|SPAC24B11.06c	gi|930406063|ref|XP_014177304.1|	4.6e-76	144	Trichosporon asahii var. asahii CBS 2479
P56|Iso_109,Iso_110|I|SPAC24B11.06c	gi|261198667|ref|XP_002625735.1|	4.85e-76	143	Ajellomyces dermatitidis SLH14081
P56|Iso_109,Iso_110|I|SPAC24B11.06c	gi|170084585|ref|XP_001873516.1|	5.44e-76	138	Laccaria bicolor S238N-H82
P56|Iso_109,Iso_110|I|SPAC24B11.06c	gi|750944183|gb|KIK02108.1|	5.5e-76	138	Laccaria amethystina LaAM-08-1
P56|Iso_109,Iso_110|I|SPAC24B11.06c	gi|402222477|gb|EJU02543.1|	5.53e-76	140	Dacryopinax primogenitus
P56|Iso_109,Iso_110|I|SPAC24B11.06c	gi|831328807|gb|KLT38464.1|	5.71e-76	144	Trichosporon oleaginosus
P56|Iso_109,Iso_110|I|SPAC24B11.06c	gi|150387832|sp|A2QRF6.2|HOG1_ASPNC	6.32e-76	140	Aspergillus niger CBS 513.88
P56|Iso_109,Iso_110|I|SPAC24B11.06c	gi|525578944|gb|EPS25194.1|	6.58e-76	140	Penicillium oxalicum 114-2
P56|Iso_109,Iso_110|I|SPAC24B11.06c	gi|406700850|gb|EKD04012.1|	7.1e-76	144	Trichosporon asahii var. asahii CBS 8904
P56|Iso_109,Iso_110|I|SPAC24B11.06c	gi|936529880|emb|CDO52783.1|	7.72e-76	140	Galactomyces candidum
P56|Iso_109,Iso_110|I|SPAC24B11.06c	gi|752280810|dbj|GAM84492.1|	8.94e-76	139	fungal sp. No.11243
P56|Iso_109,Iso_110|I|SPAC24B11.06c	gi|452888116|gb|AGG18075.1|	9.84e-76	143	Corynespora cassiicola
P56|Iso_109,Iso_110|I|SPAC24B11.06c	gi|584416958|emb|CDM28668.1|	1.07e-75	140	Penicillium roqueforti FM164
P56|Iso_109,Iso_110|I|SPAC24B11.06c	gi|700457007|gb|KGO46605.1|	1.09e-75	140	Penicillium expansum
P56|Iso_109,Iso_110|I|SPAC24B11.06c	gi|299756523|ref|XP_001829398.2|	1.12e-75	140	Coprinopsis cinerea;Coprinopsis cinerea okayama7#130
P56|Iso_109,Iso_110|I|SPAC24B11.06c	gi|169620187|ref|XP_001803505.1|	1.15e-75	143	Phaeosphaeria nodorum SN15
P56|Iso_109,Iso_110|I|SPAC24B11.06c	gi|751760272|gb|KIN08445.1|	1.18e-75	141	Oidiodendron maius Zn
P56|Iso_109,Iso_110|I|SPAC24B11.06c	gi|576986164|gb|EUC58900.1|	1.29e-75	138	Rhizoctonia solani AG-3 Rhs1AP;Rhizoctonia solani 123E
P56|Iso_109,Iso_110|I|SPAC24B11.06c	gi|682301527|gb|KFY13311.1|	1.3e-75	140	Pseudogymnoascus pannorum VKM F-3775
P56|Iso_109,Iso_110|I|SPAC24B11.06c	gi|121923978|sp|Q5I6M2.2|HOG1_SETTU	1.44e-75	143	Setosphaeria turcica
P56|Iso_109,Iso_110|I|SPAC24B11.06c	gi|662526456|gb|KEQ83837.1|	1.45e-75	141	Aureobasidium pullulans EXF-150
P56|Iso_109,Iso_110|I|SPAC24B11.06c	gi|568433783|ref|XP_006453743.1|	1.47e-75	140	Agaricus bisporus var. burnettii JB137-S8;Agaricus bisporus var. bisporus H97
P56|Iso_109,Iso_110|I|SPAC24B11.06c	gi|751740540|gb|KIM88818.1|	1.5e-75	144	Piloderma croceum F 1598
P56|Iso_109,Iso_110|I|SPAC24B11.06c	gi|750960392|gb|KIK17339.1|	1.54e-75	144	Pisolithus microcarpus 441
P56|Iso_109,Iso_110|I|SPAC24B11.06c	gi|816345861|gb|KKK22232.1|	1.62e-75	140	Aspergillus ochraceoroseus
P56|Iso_109,Iso_110|I|SPAC24B11.06c	gi|821510563|gb|KKZ66785.1|	1.63e-75	143	Emmonsia crescens UAMH 3008
P56|Iso_109,Iso_110|I|SPAC24B11.06c	gi|824370147|gb|KLJ10939.1|	1.64e-75	143	Emmonsia parva UAMH 139
P56|Iso_109,Iso_110|I|SPAC24B11.06c	gi|312285456|gb|ADQ64418.1|	1.72e-75	140	Penicillium digitatum
P56|Iso_109,Iso_110|I|SPAC24B11.06c	gi|599153071|gb|EYE92398.1|	1.81e-75	140	Aspergillus ruber CBS 135680
P56|Iso_109,Iso_110|I|SPAC24B11.06c	gi|531865206|gb|EQL02136.1|	1.83e-75	139	Ophiocordyceps sinensis CO18
P56|Iso_109,Iso_110|I|SPAC24B11.06c	gi|799251157|gb|KJZ79774.1|	2e-75	144	Hirsutella minnesotensis 3608
P56|Iso_109,Iso_110|I|SPAC24B11.06c	gi|148886844|sp|Q0U4L8.2|HOG1_PHANO	2.57e-75	143	Phaeosphaeria nodorum SN15
P56|Iso_109,Iso_110|I|SPAC24B11.06c	gi|380486225|emb|CCF38842.1|	2.9e-75	143	Colletotrichum higginsianum
P56|Iso_109,Iso_110|I|SPAC24B11.06c	gi|121938674|sp|Q38HL5.1|HOG1_EURHE	2.98e-75	140	Aspergillus glaucus
P56|Iso_109,Iso_110|I|SPAC24B11.06c	gi|74697114|sp|Q875L0.1|HOG1_CRYPA	3.02e-75	139	Cryphonectria parasitica
P56|Iso_109,Iso_110|I|SPAC24B11.06c	gi|597917525|ref|XP_007313107.1|	3.1e-75	144	Serpula lacrymans var. lacrymans S7.9;Serpula lacrymans var. lacrymans S7.3
P56|Iso_109,Iso_110|I|SPAC24B11.06c	gi|729707542|emb|CEI95947.1|	3.14e-75	140	Rhizopus microsporus
P56|Iso_109,Iso_110|I|SPAC24B11.06c	gi|928585898|gb|ALF02873.1|	3.21e-75	139	Curvularia lunata
P56|Iso_109,Iso_110|I|SPAC24B11.06c	gi|386869926|gb|AFJ42499.1|	3.28e-75	139	Curvularia lunata
P56|Iso_109,Iso_110|I|SPAC24B11.06c	gi|727134775|emb|CEG82031.1|	3.62e-75	140	Rhizopus microsporus
P56|Iso_109,Iso_110|I|SPAC24B11.06c	gi|549048678|emb|CCX12118.1|	3.7e-75	141	Pyronema omphalodes CBS 100304
P56|Iso_109,Iso_110|I|SPAC24B11.06c	gi|189198435|ref|XP_001935555.1|	3.72e-75	143	Alternaria alternata;Alternaria brassicicola;Pyrenophora tritici-repentis Pt-1C-BFP;Pyrenophora teres f. teres 0-1
P56|Iso_109,Iso_110|I|SPAC24B11.06c	gi|74696001|sp|Q75Q66.1|HOG1_COLOR	4.19e-75	143	Colletotrichum lagenaria;Colletotrichum orbiculare MAFF 240422
P56|Iso_109,Iso_110|I|SPAC24B11.06c	gi|910298541|gb|KNG90059.1|	4.39e-75	140	Aspergillus nomius NRRL 13137
P56|Iso_109,Iso_110|I|SPAC24B11.06c	gi|949389659|dbj|GAP87263.1|	4.52e-75	143	Rosellinia necatrix
P56|Iso_109,Iso_110|I|SPAC24B11.06c	gi|749768842|gb|KII93271.1|	4.76e-75	144	Plicaturopsis crispa FD-325 SS-3
P56|Iso_109,Iso_110|I|SPAC24B11.06c	gi|700488852|gb|KGO73999.1|	4.84e-75	140	Penicillium italicum
P56|Iso_109,Iso_110|I|SPAC24B11.06c	gi|973783018|gb|KUM57322.1|	4.89e-75	140	Penicillium freii
P56|Iso_109,Iso_110|I|SPAC24B11.06c	gi|902273697|emb|CRL22826.1|	5.06e-75	140	Penicillium camemberti
P56|Iso_109,Iso_110|I|SPAC24B11.06c	gi|909989248|gb|KNG46772.1|	5.07e-75	143	Stemphylium lycopersici
P56|Iso_109,Iso_110|I|SPAC24B11.06c	gi|477528714|gb|ENH80487.1|	6.37e-75	143	Colletotrichum orbiculare MAFF 240422
P56|Iso_109,Iso_110|I|SPAC24B11.06c	gi|759231652|gb|KIW08623.1|	6.64e-75	143	Ochroconis gallopava
P56|Iso_109,Iso_110|I|SPAC24B11.06c	gi|972540217|gb|KUJ16839.1|	6.87e-75	140	Phialocephala scopiformis
P56|Iso_109,Iso_110|I|SPAC24B11.06c	gi|972134619|gb|KUI62954.1|	7.22e-75	139	Valsa mali;Valsa mali var. pyri
P56|Iso_109,Iso_110|I|SPAC24B11.06c	gi|859268172|emb|CEO59468.1|	7.87e-75	140	Penicillium brasilianum
P56|Iso_109,Iso_110|I|SPAC24B11.06c	gi|596688723|ref|XP_007280298.1|	8.38e-75	143	Colletotrichum gloeosporioides Nara gc5
P56|Iso_109,Iso_110|I|SPAC24B11.06c	gi|918803758|ref|XP_013424939.1|	8.72e-75	141	Aureobasidium pullulans var. namibiae CBS 147.97
P56|Iso_109,Iso_110|I|SPAC24B11.06c	gi|628825097|ref|XP_007762852.1|	8.97e-75	140	Coniophora puteana RWD-64-598 SS2
P56|Iso_109,Iso_110|I|SPAC24B11.06c	gi|595488749|gb|EXX73660.1|	9.14e-75	141	Rhizophagus irregularis DAOM 197198w
P56|Iso_109,Iso_110|I|SPAC24B11.06c	gi|599395700|ref|XP_007411421.1|	9.57e-75	138	Melampsora larici-populina 98AG31
P56|Iso_109,Iso_110|I|SPAC24B11.06c	gi|754419204|ref|XP_011277271.1|	1.04e-74	140	Wickerhamomyces ciferrii
P56|Iso_109,Iso_110|I|SPAC24B11.06c	gi|750998868|gb|KIK41091.1|	1.15e-74	144	Suillus luteus UH-Slu-Lm8-n1
P56|Iso_109,Iso_110|I|SPAC24B11.06c	gi|148886841|sp|Q0D0P5.2|HOG1_ASPTN	1.17e-74	140	Aspergillus terreus NIH2624
P56|Iso_109,Iso_110|I|SPAC24B11.06c	gi|682331380|gb|KFY30476.1|	1.2e-74	140	Pseudogymnoascus pannorum VKM F-4513 (FW-928)
P56|Iso_109,Iso_110|I|SPAC24B11.06c	gi|367033031|ref|XP_003665798.1|	1.32e-74	139	Myceliophthora thermophila ATCC 42464
P56|Iso_109,Iso_110|I|SPAC24B11.06c	gi|115491895|ref|XP_001210575.1|	1.38e-74	140	Aspergillus terreus NIH2624
P56|Iso_109,Iso_110|I|SPAC24B11.06c	gi|648171902|gb|KDR85518.1|	1.39e-74	140	Galerina marginata CBS 339.88
P56|Iso_109,Iso_110|I|SPAC24B11.06c	gi|595488748|gb|EXX73659.1|	1.53e-74	141	Rhizophagus irregularis DAOM 197198w
P56|Iso_109,Iso_110|I|SPAC24B11.06c	gi|662505469|gb|KEQ63082.1|	1.72e-74	141	Aureobasidium melanogenum CBS 110374
P56|Iso_109,Iso_110|I|SPAC24B11.06c	gi|924889454|gb|KOS45432.1|	1.82e-74	140	Penicillium nordicum
P56|Iso_109,Iso_110|I|SPAC24B11.06c	gi|507138147|gb|AGM37759.1|	1.86e-74	140	Penicillium verrucosum
P56|Iso_109,Iso_110|I|SPAC24B11.06c	gi|627805831|ref|XP_007676263.1|	1.9e-74	140	Baudoinia compniacensis UAMH 10762
P56|Iso_109,Iso_110|I|SPAC24B11.06c	gi|156050009|ref|XP_001590966.1|	1.93e-74	140	Sclerotinia sclerotiorum 1980 UF-70
P56|Iso_109,Iso_110|I|SPAC24B11.06c	gi|552930310|gb|ESA14053.1|	1.94e-74	141	Rhizophagus irregularis DAOM 181602
P56|Iso_109,Iso_110|I|SPAC24B11.06c	gi|924817844|gb|KOS15975.1|	1.96e-74	140	Malassezia pachydermatis
P56|Iso_109,Iso_110|I|SPAC24B11.06c	gi|685412075|ref|XP_009224895.1|	1.99e-74	143	Gaeumannomyces graminis var. tritici R3-111a-1
P56|Iso_109,Iso_110|I|SPAC24B11.06c	gi|629669459|ref|XP_007796681.1|	2e-74	142	Eutypa lata UCREL1
P56|Iso_109,Iso_110|I|SPAC24B11.06c	gi|749898875|gb|KIJ66459.1|	2.33e-74	144	Hydnomerulius pinastri MD-312
P56|Iso_109,Iso_110|I|SPAC24B11.06c	gi|682326634|gb|KFY27556.1|	2.49e-74	140	Pseudogymnoascus pannorum VKM F-4281 (FW-2241)
P56|Iso_109,Iso_110|I|SPAC24B11.06c	gi|646310211|gb|KDQ31354.1|	2.62e-74	141	Pleurotus ostreatus PC15
P56|Iso_109,Iso_110|I|SPAC24B11.06c	gi|507138149|gb|AGM37760.1|	2.66e-74	140	Penicillium nordicum
P56|Iso_109,Iso_110|I|SPAC24B11.06c	gi|682408563|gb|KFY82834.1|	2.76e-74	140	Pseudogymnoascus pannorum VKM F-4518 (FW-2643);Pseudogymnoascus pannorum VKM F-4520 (FW-2644)
P56|Iso_109,Iso_110|I|SPAC24B11.06c	gi|682366329|gb|KFY52717.1|	2.76e-74	140	Pseudogymnoascus pannorum VKM F-4515 (FW-2607);Pseudogymnoascus pannorum VKM F-4517 (FW-2822)
P56|Iso_109,Iso_110|I|SPAC24B11.06c	gi|682284974|gb|KFY05146.1|	2.95e-74	140	Pseudogymnoascus pannorum VKM F-3808
P56|Iso_109,Iso_110|I|SPAC24B11.06c	gi|640916383|gb|KDN61189.1|	3.09e-74	143	Colletotrichum sublineola
P56|Iso_109,Iso_110|I|SPAC24B11.06c	gi|827060163|ref|XP_008091665.1|	3.09e-74	143	Colletotrichum graminicola M1.001
P56|Iso_109,Iso_110|I|SPAC24B11.06c	gi|831350776|ref|XP_012745232.1|	3.82e-74	140	Pseudogymnoascus destructans 20631-21
P56|Iso_109,Iso_110|I|SPAC24B11.06c	gi|719930656|gb|EEH16705.2|	3.89e-74	143	Paracoccidioides brasiliensis Pb03
P56|Iso_109,Iso_110|I|SPAC24B11.06c	gi|761929498|gb|KIY50478.1|	3.94e-74	142	Fistulina hepatica ATCC 64428
P56|Iso_109,Iso_110|I|SPAC24B11.06c	gi|682444552|gb|KFZ05876.1|	4.05e-74	140	Pseudogymnoascus pannorum VKM F-4519 (FW-2642)
P56|Iso_109,Iso_110|I|SPAC24B11.06c	gi|961979313|gb|KTB45831.1|	4.13e-74	140	Moniliophthora roreri
P56|Iso_109,Iso_110|I|SPAC24B11.06c	gi|588254490|ref|XP_006956427.1|	4.54e-74	141	Wallemia sebi CBS 633.66
P56|Iso_109,Iso_110|I|SPAC24B11.06c	gi|478665460|gb|AGJ43273.1|	4.55e-74	140	Candida glycerinogenes
P56|Iso_109,Iso_110|I|SPAC24B11.06c	gi|936405448|gb|KPM34667.1|	4.86e-74	142	Neonectria ditissima
P56|Iso_109,Iso_110|I|SPAC24B11.06c	gi|751721053|gb|KIM70041.1|	5.09e-74	138	Scleroderma citrinum Foug A
P56|Iso_109,Iso_110|I|SPAC24B11.06c	gi|631376570|ref|XP_007922665.1|	5.33e-74	143	Pseudocercospora fijiensis CIRAD86
P56|Iso_109,Iso_110|I|SPAC24B11.06c	gi|909602611|gb|KNE93051.1|	5.43e-74	138	Puccinia striiformis f. sp. tritici PST-78
P56|Iso_109,Iso_110|I|SPAC24B11.06c	gi|915700840|ref|XP_013346341.1|	5.64e-74	141	Aureobasidium subglaciale EXF-2481
P56|Iso_109,Iso_110|I|SPAC24B11.06c	gi|761953754|gb|KIY73390.1|	5.82e-74	144	Cylindrobasidium torrendii FP15055 ss-10
P56|Iso_109,Iso_110|I|SPAC24B11.06c	gi|440488644|gb|ELQ68359.1|	5.96e-74	143	Magnaporthe oryzae P131
P56|Iso_109,Iso_110|I|SPAC24B11.06c	gi|389634371|ref|XP_003714838.1|	6.16e-74	143	Magnaporthe grisea;Magnaporthe oryzae 70-15;Magnaporthe oryzae Y34
P56|Iso_109,Iso_110|I|SPAC24B11.06c	gi|672717965|gb|AIJ50382.1|	6.17e-74	139	Hortaea werneckii
P56|Iso_109,Iso_110|I|SPAC24B11.06c	gi|701696152|gb|EEH36212.2|	6.25e-74	143	Paracoccidioides sp. 'lutzii' Pb01
P56|Iso_109,Iso_110|I|SPAC24B11.06c	gi|302413916|ref|XP_003004790.1|	7.33e-74	139	Verticillium alfalfae VaMs.102
P56|Iso_109,Iso_110|I|SPAC24B11.06c	gi|465795395|emb|CCU99966.1|	7.6e-74	140	Malassezia sympodialis ATCC 42132
P56|Iso_109,Iso_110|I|SPAC24B11.06c	gi|749847512|gb|KIJ22223.1|	7.7e-74	144	Paxillus involutus ATCC 200175
P56|Iso_109,Iso_110|I|SPAC24B11.06c	gi|74697400|sp|Q8NJT7.1|HOG1_HORWE	7.73e-74	139	Hortaea werneckii
P56|Iso_109,Iso_110|I|SPAC24B11.06c	gi|734673866|ref|XP_010757223.1|	7.92e-74	143	Paracoccidioides brasiliensis Pb18
P56|Iso_109,Iso_110|I|SPAC24B11.06c	gi|630014465|ref|XP_007831218.1|	7.96e-74	142	Pestalotiopsis fici W106-1
P56|Iso_109,Iso_110|I|SPAC24B11.06c	gi|682397518|gb|KFY75289.1|	8.5e-74	140	Pseudogymnoascus pannorum VKM F-103
P56|Iso_109,Iso_110|I|SPAC24B11.06c	gi|763731185|gb|KJA28589.1|	8.68e-74	138	Hypholoma sublateritium FD-334 SS-4
P56|Iso_109,Iso_110|I|SPAC24B11.06c	gi|821083464|gb|KKY36888.1|	8.78e-74	139	Diaporthe ampelina
P56|Iso_109,Iso_110|I|SPAC24B11.06c	gi|453087714|gb|EMF15755.1|	9.01e-74	140	Sphaerulina musiva SO2202
P56|Iso_109,Iso_110|I|SPAC24B11.06c	gi|666864637|gb|KEZ41261.1|	9.08e-74	139	Pseudallescheria apiosperma
P56|Iso_109,Iso_110|I|SPAC24B11.06c	gi|697084092|ref|XP_009655080.1|	9.61e-74	139	Verticillium dahliae VdLs.17
P56|Iso_109,Iso_110|I|SPAC24B11.06c	gi|615463710|ref|XP_007598751.1|	9.69e-74	143	Colletotrichum fioriniae PJ7
P56|Iso_109,Iso_110|I|SPAC24B11.06c	gi|154318036|ref|XP_001558337.1|	1e-73	144	Botryotinia fuckeliana;Botryotinia fuckeliana B05.10;Botryotinia fuckeliana T4;Botryotinia fuckeliana BcDW1
P56|Iso_109,Iso_110|I|SPAC24B11.06c	gi|751066258|gb|KIL00789.1|	1.21e-73	144	Paxillus rubicundulus Ve08.2h10
P56|Iso_109,Iso_110|I|SPAC24B11.06c	gi|671690839|emb|CDS05577.1|	1.27e-73	140	Lichtheimia ramosa
P56|Iso_109,Iso_110|I|SPAC24B11.06c	gi|751185467|gb|KIL71402.1|	1.32e-73	140	Amanita muscaria Koide BX008
P56|Iso_109,Iso_110|I|SPAC24B11.06c	gi|749884582|gb|KIJ53990.1|	1.37e-73	142	Sphaerobolus stellatus SS14
P56|Iso_109,Iso_110|I|SPAC24B11.06c	gi|289719654|gb|ADD17355.1|	1.44e-73	143	Alternaria alternata
P56|Iso_109,Iso_110|I|SPAC24B11.06c	gi|695531263|ref|XP_009540574.1|	1.46e-73	144	Heterobasidion irregulare TC 32-1
P56|Iso_109,Iso_110|I|SPAC24B11.06c	gi|339792786|gb|AEK12774.1|	1.48e-73	144	Heterobasidion annosum
P56|Iso_109,Iso_110|I|SPAC24B11.06c	gi|727148117|emb|CEG69899.1|	1.49e-73	140	Rhizopus microsporus
P56|Iso_109,Iso_110|I|SPAC24B11.06c	gi|743639456|gb|KID70823.1|	1.5e-73	139	Metarhizium anisopliae ARSEF 549
P56|Iso_109,Iso_110|I|SPAC24B11.06c	gi|597575565|ref|XP_007290839.1|	1.54e-73	140	Marssonina brunnea f. sp. 'multigermtubi' MB_m1
P56|Iso_109,Iso_110|I|SPAC24B11.06c	gi|452846212|gb|EME48145.1|	1.93e-73	140	Dothistroma septosporum NZE10
P56|Iso_109,Iso_110|I|SPAC24B11.06c	gi|695114176|gb|KGK40708.1|	2.01e-73	140	Pichia kudriavzevii
P56|Iso_109,Iso_110|I|SPAC24B11.06c	gi|672796567|gb|KFH47112.1|	2.04e-73	139	Acremonium chrysogenum ATCC 11550
P56|Iso_109,Iso_110|I|SPAC24B11.06c	gi|212532183|ref|XP_002146248.1|	2.38e-73	132	Talaromyces marneffei ATCC 18224;Talaromyces marneffei PM1
P56|Iso_109,Iso_110|I|SPAC24B11.06c	gi|74691494|sp|Q702W0.1|HOG1_BLAAD	2.42e-73	140	Blastobotrys adeninivorans
P56|Iso_109,Iso_110|I|SPAC24B11.06c	gi|952546936|dbj|GAQ10657.1|	2.46e-73	140	Aspergillus lentulus
P56|Iso_109,Iso_110|I|SPAC24B11.06c	gi|576040898|ref|XP_006694322.1|	3.17e-73	142	Chaetomium thermophilum var. thermophilum DSM 1495
P56|Iso_109,Iso_110|I|SPAC24B11.06c	gi|748542756|gb|KIH93060.1|	3.19e-73	139	Sporothrix brasiliensis 5110
P56|Iso_109,Iso_110|I|SPAC24B11.06c	gi|302895597|ref|XP_003046679.1|	3.37e-73	139	Nectria haematococca mpVI 77-13-4
P56|Iso_109,Iso_110|I|SPAC24B11.06c	gi|629698265|ref|XP_007814424.1|	3.63e-73	139	Metarhizium anisopliae;Metarhizium acridum;Metarhizium robertsii;Metarhizium acridum CQMa 102;Metarhizium anisopliae ARSEF 23;Metarhizium guizhouense ARSEF 977;Metarhizium brunneum ARSEF 3297;Metarhizium majus ARSEF 297;Metarhizium anisopliae BRIP 53293;Metarhizium anisopliae BRIP 53284
P56|Iso_109,Iso_110|I|SPAC24B11.06c	gi|661187890|emb|CDH50109.1|	3.65e-73	140	Lichtheimia corymbifera JMRC:FSU:9682
P56|Iso_109,Iso_110|I|SPAC24B11.06c	gi|646296974|gb|KDQ18133.1|	3.73e-73	140	Botryobasidium botryosum FD-172 SS1
P56|Iso_109,Iso_110|I|SPAC24B11.06c	gi|171683557|ref|XP_001906721.1|	3.73e-73	139	Podospora anserina S mat+
P56|Iso_109,Iso_110|I|SPAC24B11.06c	gi|672827788|gb|KFH72678.1|	3.89e-73	144	Mortierella verticillata NRRL 6337
P56|Iso_109,Iso_110|I|SPAC24B11.06c	gi|751697727|gb|KIM47704.1|	4.41e-73	138	Hebeloma cylindrosporum h7
P56|Iso_109,Iso_110|I|SPAC24B11.06c	gi|521774235|gb|EPQ65454.1|	4.58e-73	144	Blumeria graminis f. sp. tritici 96224
P56|Iso_109,Iso_110|I|SPAC24B11.06c	gi|74691450|sp|Q6XKY3.1|HOG1_HYPAT	4.78e-73	140	Trichoderma atroviride
P56|Iso_109,Iso_110|I|SPAC24B11.06c	gi|927391495|ref|XP_013941593.1|	4.99e-73	140	Trichoderma gamsii;Trichoderma atroviride IMI 206040
P56|Iso_109,Iso_110|I|SPAC24B11.06c	gi|336258365|ref|XP_003343998.1|	5.1e-73	143	Sordaria macrospora k-hell
P56|Iso_109,Iso_110|I|SPAC24B11.06c	gi|74697746|sp|Q8TGA9.1|HOG1_BLUGR	5.27e-73	144	Blumeria graminis;Blumeria graminis f. sp. hordei DH14
P56|Iso_109,Iso_110|I|SPAC24B11.06c	gi|367053729|ref|XP_003657243.1|	5.93e-73	139	Thielavia terrestris NRRL 8126
P56|Iso_109,Iso_110|I|SPAC24B11.06c	gi|526452242|gb|AGR86103.1|	6e-73	140	Dekkera bruxellensis
P56|Iso_109,Iso_110|I|SPAC24B11.06c	gi|550809676|gb|ERT01589.1|	6.51e-73	139	Sporothrix schenckii ATCC 58251;Sporothrix schenckii 1099-18
P56|Iso_109,Iso_110|I|SPAC24B11.06c	gi|734664501|gb|KHO01547.1|	6.57e-73	139	Metarhizium album ARSEF 1941
P56|Iso_109,Iso_110|I|SPAC24B11.06c	gi|403163041|ref|XP_003323178.2|	6.58e-73	138	Puccinia graminis f. sp. tritici CRL 75-36-700-3
P56|Iso_109,Iso_110|I|SPAC24B11.06c	gi|384494331|gb|EIE84822.1|	6.77e-73	140	Rhizopus delemar RA 99-880
P56|Iso_109,Iso_110|I|SPAC24B11.06c	gi|663447579|emb|CDR46109.1|	7.36e-73	143	Cyberlindnera fabianii
P56|Iso_109,Iso_110|I|SPAC24B11.06c	gi|398391216|ref|XP_003849068.1|	7.93e-73	140	Zymoseptoria tritici IPO323;Zymoseptoria brevis;Zymoseptoria tritici
P56|Iso_109,Iso_110|I|SPAC24B11.06c	gi|758362369|emb|CEP15262.1|	8.7e-73	140	Parasitella parasitica
P56|Iso_109,Iso_110|I|SPAC24B11.06c	gi|685860505|ref|XP_009257285.1|	8.84e-73	139	Fusarium graminearum;Fusarium langsethiae;Fusarium graminearum PH-1;Fusarium pseudograminearum CS3096;Fusarium sp. FIESC_5 CS3069
P56|Iso_109,Iso_110|I|SPAC24B11.06c	gi|698985998|ref|XP_009849980.1|	1.21e-72	143	Neurospora tetrasperma FGSC 2508;Neurospora tetrasperma FGSC 2509
P56|Iso_109,Iso_110|I|SPAC24B11.06c	gi|973328686|gb|KUL88580.1|	1.22e-72	132	Talaromyces verruculosus
P56|Iso_109,Iso_110|I|SPAC24B11.06c	gi|835894063|gb|KLU85990.1|	1.29e-72	143	Magnaporthe poae ATCC 64411
P56|Iso_109,Iso_110|I|SPAC24B11.06c	gi|119181640|ref|XP_001242019.1|	1.3e-72	144	Coccidioides posadasii C735 delta SOWgp;Coccidioides immitis RS;Coccidioides immitis H538.4;Coccidioides immitis RMSCC 2394;Coccidioides posadasii RMSCC 3488;Coccidioides immitis RMSCC 3703
P56|Iso_109,Iso_110|I|SPAC24B11.06c	gi|510999690|gb|EPB81291.1|	1.32e-72	140	Mucor circinelloides f. circinelloides 1006PhL
P56|Iso_109,Iso_110|I|SPAC24B11.06c	gi|589100037|ref|XP_006962041.1|	1.33e-72	140	Trichoderma reesei QM6a;Trichoderma reesei RUT C-30
P56|Iso_109,Iso_110|I|SPAC24B11.06c	gi|908392387|gb|KND93005.1|	1.41e-72	164	Tolypocladium ophioglossoides CBS 100239
P56|Iso_109,Iso_110|I|SPAC24B11.06c	gi|164424462|ref|XP_962163.2|	1.43e-72	143	Neurospora crassa;Neurospora crassa OR74A
P56|Iso_109,Iso_110|I|SPAC24B11.06c	gi|584132940|gb|EWG42323.1|	1.49e-72	139	Fusarium verticillioides 7600
P56|Iso_109,Iso_110|I|SPAC24B11.06c	gi|260948254|ref|XP_002618424.1|	1.77e-72	143	Clavispora lusitaniae ATCC 42720
P56|Iso_109,Iso_110|I|SPAC24B11.06c	gi|667653393|ref|XP_008598528.1|	1.89e-72	139	Beauveria bassiana ARSEF 2860
P56|Iso_109,Iso_110|I|SPAC24B11.06c	gi|927419414|ref|XP_013955538.1|	1.95e-72	140	Trichoderma virens Gv29-8
P56|Iso_109,Iso_110|I|SPAC24B11.06c	gi|598011703|ref|XP_007337203.1|	2.06e-72	140	Auricularia delicata TFB-10046 SS5
P56|Iso_109,Iso_110|I|SPAC24B11.06c	gi|701773880|gb|KGQ08227.1|	2.06e-72	139	Beauveria bassiana D1-5
P56|Iso_109,Iso_110|I|SPAC24B11.06c	gi|914266979|gb|KNZ81674.1|	2.08e-72	134	Termitomyces sp. J132
P56|Iso_109,Iso_110|I|SPAC24B11.06c	gi|363751861|ref|XP_003646147.1|	2.13e-72	138	Eremothecium cymbalariae DBVPG#7215
P56|Iso_109,Iso_110|I|SPAC24B11.06c	gi|672828678|gb|KFH73567.1|	2.17e-72	139	Mortierella verticillata NRRL 6337
P56|Iso_109,Iso_110|I|SPAC24B11.06c	gi|752368634|gb|KIO26425.1|	2.32e-72	140	Tulasnella calospora MUT 4182
P56|Iso_109,Iso_110|I|SPAC24B11.06c	gi|477521750|gb|ENH73834.1|	2.51e-72	139	Fusarium verticillioides 7600;Fusarium oxysporum f. sp. lycopersici 4287;Fusarium oxysporum Fo47;Fusarium oxysporum FOSC 3-a;Fusarium oxysporum f. sp. lycopersici MN25;Fusarium oxysporum f. sp. pisi HDV247;Fusarium oxysporum f. sp. radicis-lycopersici 26381;Fusarium oxysporum f. sp. vasinfectum 25433;Fusarium oxysporum f. sp. cubense tropical race 4 54006;Fusarium oxysporum f. sp. melonis 26406;F…
P56|Iso_109,Iso_110|I|SPAC24B11.06c	gi|366997887|ref|XP_003683680.1|	2.66e-72	140	Tetrapisispora phaffii CBS 4417
P56|Iso_109,Iso_110|I|SPAC24B11.06c	gi|864422129|emb|CRX79224.1|	2.71e-72	156	Leucosporidium scottii
P56|Iso_109,Iso_110|I|SPAC24B11.06c	gi|635552465|sp|M1T7M3.1|HOG1B_WALI9	2.74e-72	141	Wallemia ichthyophaga;Wallemia ichthyophaga EXF-994
P56|Iso_109,Iso_110|I|SPAC24B11.06c	gi|254564929|ref|XP_002489575.1|	2.77e-72	141	Komagataella pastoris GS115;Komagataella pastoris CBS 7435
P56|Iso_109,Iso_110|I|SPAC24B11.06c	gi|121808018|sp|Q2WGK3.1|HOG1_TRIHA	2.84e-72	140	Trichoderma harzianum;Trichoderma sp. HV-2014p
P56|Iso_109,Iso_110|I|SPAC24B11.06c	gi|630178524|ref|XP_007844533.1|	2.88e-72	140	Moniliophthora roreri MCA 2997
P56|Iso_109,Iso_110|I|SPAC24B11.06c	gi|116194432|ref|XP_001223028.1|	2.88e-72	139	Chaetomium globosum CBS 148.51
P56|Iso_109,Iso_110|I|SPAC24B11.06c	gi|685953243|ref|XP_009270326.1|	3.19e-72	141	Wallemia ichthyophaga EXF-994
P56|Iso_109,Iso_110|I|SPAC24B11.06c	gi|829149215|gb|KLP18312.1|	3.26e-72	139	Fusarium fujikuroi
P56|Iso_109,Iso_110|I|SPAC24B11.06c	gi|531989491|emb|CCT64307.1|	3.26e-72	139	Fusarium fujikuroi;Fusarium fujikuroi IMI 58289
P56|Iso_109,Iso_110|I|SPAC24B11.06c	gi|342874269|gb|EGU76308.1|	3.55e-72	139	Fusarium oxysporum Fo5176
P56|Iso_109,Iso_110|I|SPAC24B11.06c	gi|349579837|dbj|GAA24998.1|	3.67e-72	141	Saccharomyces cerevisiae Kyokai no. 7;Saccharomyces cerevisiae YJM1387;Saccharomyces cerevisiae YJM1388;Saccharomyces cerevisiae YJM1389;Saccharomyces cerevisiae YJM1460;Saccharomyces cerevisiae YJM1592
P56|Iso_109,Iso_110|I|SPAC24B11.06c	gi|323308124|gb|EGA61377.1|	3.79e-72	141	Saccharomyces boulardii;Saccharomyces cerevisiae AWRI796;Saccharomyces cerevisiae FostersO;Saccharomyces cerevisiae YJM195;Saccharomyces cerevisiae YJM450;Saccharomyces cerevisiae YJM453;Saccharomyces cerevisiae YJM627;Saccharomyces cerevisiae YJM681;Saccharomyces cerevisiae YJM689;Saccharomyces cerevisiae YJM1133;Saccharomyces cerevisiae YJM1199;Saccharomyces cerevisiae YJM1202;Saccharomyces cer…
P56|Iso_109,Iso_110|I|SPAC24B11.06c	gi|768826693|gb|AJV50684.1|	3.83e-72	141	Saccharomyces cerevisiae YJM248;Saccharomyces cerevisiae YJM1250;Saccharomyces cerevisiae YJM1252;Saccharomyces cerevisiae YJM1381;Saccharomyces cerevisiae YJM1450
P56|Iso_109,Iso_110|I|SPAC24B11.06c	gi|323303881|gb|EGA57662.1|	3.83e-72	141	Saccharomyces cerevisiae FostersB
P56|Iso_109,Iso_110|I|SPAC24B11.06c	gi|730174064|gb|KHJ31130.1|	3.87e-72	143	Erysiphe necator
P56|Iso_109,Iso_110|I|SPAC24B11.06c	gi|768839297|gb|AJV63260.1|	3.98e-72	141	Saccharomyces cerevisiae YJM1419;Saccharomyces cerevisiae YJM1478
P56|Iso_109,Iso_110|I|SPAC24B11.06c	gi|74691305|sp|Q6PWX2.1|HOG1_BEABA	4.06e-72	139	Beauveria bassiana
P56|Iso_109,Iso_110|I|SPAC24B11.06c	gi|768824918|gb|AJV48913.1|	4.19e-72	141	Saccharomyces cerevisiae YJM428;Saccharomyces cerevisiae YJM1208;Saccharomyces cerevisiae YJM1304;Saccharomyces cerevisiae YJM1386;Saccharomyces cerevisiae YJM1433;Saccharomyces cerevisiae YJM1615
P56|Iso_109,Iso_110|I|SPAC24B11.06c	gi|924819992|gb|KOS17949.1|	4.21e-72	140	Escovopsis weberi
P56|Iso_109,Iso_110|I|SPAC24B11.06c	gi|768854390|gb|AJV78319.1|	4.22e-72	141	Saccharomyces cerevisiae YJM470
P56|Iso_109,Iso_110|I|SPAC24B11.06c	gi|636602599|ref|XP_008032434.1|	4.45e-72	141	Trametes versicolor FP-101664 SS1
P56|Iso_109,Iso_110|I|SPAC24B11.06c	gi|618809439|ref|XP_007307415.1|	4.8e-72	140	Stereum hirsutum FP-91666 SS1
P56|Iso_109,Iso_110|I|SPAC24B11.06c	gi|334854370|gb|AEH05928.1|	4.82e-72	137	Volvariella volvacea
P56|Iso_109,Iso_110|I|SPAC24B11.06c	gi|949380349|emb|CUS25020.1|	4.83e-72	143	Lachancea sp. KF-2015
P56|Iso_109,Iso_110|I|SPAC24B11.06c	gi|920635126|gb|KOM17339.1|	5.33e-72	144	Ophiocordyceps unilateralis
P56|Iso_109,Iso_110|I|SPAC24B11.06c	gi|599349807|ref|XP_007390925.1|	5.34e-72	145	Phanerochaete carnosa HHB-10118-sp
P56|Iso_109,Iso_110|I|SPAC24B11.06c	gi|255718611|ref|XP_002555586.1|	5.86e-72	143	Lachancea thermotolerans CBS 6340
P56|Iso_109,Iso_110|I|SPAC24B11.06c	gi|727131561|emb|CEG84519.1|	6.52e-72	140	Rhizopus microsporus
P56|Iso_109,Iso_110|I|SPAC24B11.06c	gi|512194131|gb|EPE09887.1|	6.8e-72	142	Ophiostoma piceae UAMH 11346
P56|Iso_109,Iso_110|I|SPAC24B11.06c	gi|758348629|dbj|GAN09090.1|	7.91e-72	140	Mucor ambiguus
P56|Iso_109,Iso_110|I|SPAC24B11.06c	gi|513033947|gb|AGO13913.1|	7.93e-72	138	Saccharomycetaceae sp. 'Ashbya aceri'
P56|Iso_109,Iso_110|I|SPAC24B11.06c	gi|913853991|emb|CRK25369.1|	8.62e-72	138	Verticillium longisporum
P56|Iso_109,Iso_110|I|SPAC24B11.06c	gi|258572306|ref|XP_002544915.1|	9.14e-72	143	Uncinocarpus reesii 1704
P56|Iso_109,Iso_110|I|SPAC24B11.06c	gi|607977346|gb|EZG06505.1|	1.02e-71	143	Trichophyton rubrum CBS 735.88
P56|Iso_109,Iso_110|I|SPAC24B11.06c	gi|607878110|gb|EZF23195.1|	1.05e-71	143	Trichophyton rubrum CBS 118892;Trichophyton rubrum CBS 100081;Trichophyton rubrum CBS 289.86;Trichophyton rubrum CBS 288.86;Trichophyton soudanense CBS 452.61;Trichophyton rubrum CBS 202.88;Trichophyton rubrum D6;Trichophyton rubrum MR850;Trichophyton rubrum MR1448;Trichophyton rubrum MR1459
P56|Iso_109,Iso_110|I|SPAC24B11.06c	gi|164661117|ref|XP_001731681.1|	1.28e-71	139	Malassezia globosa CBS 7966
P56|Iso_109,Iso_110|I|SPAC24B11.06c	gi|661188200|emb|CDH49840.1|	1.33e-71	140	Lichtheimia corymbifera JMRC:FSU:9682
P56|Iso_109,Iso_110|I|SPAC24B11.06c	gi|671695872|emb|CDS10591.1|	1.48e-71	140	Lichtheimia ramosa
P56|Iso_109,Iso_110|I|SPAC24B11.06c	gi|527298513|gb|EPS99320.1|	1.49e-71	140	Fomitopsis pinicola FP-58527 SS1
P56|Iso_109,Iso_110|I|SPAC24B11.06c	gi|50294882|ref|XP_449852.1|	1.53e-71	138	Candida glabrata;Candida glabrata CBS 138
P56|Iso_109,Iso_110|I|SPAC24B11.06c	gi|384497595|gb|EIE88086.1|	1.55e-71	140	Rhizopus delemar RA 99-880
P56|Iso_109,Iso_110|I|SPAC24B11.06c	gi|632917828|gb|KDB17291.1|	1.78e-71	139	Villosiclava virens
P56|Iso_109,Iso_110|I|SPAC24B11.06c	gi|691796965|emb|CDO68487.1|	1.82e-71	141	Trametes cinnabarina
P56|Iso_109,Iso_110|I|SPAC24B11.06c	gi|599095012|ref|XP_007379156.1|	1.82e-71	138	Punctularia strigosozonata HHB-11173 SS5
P56|Iso_109,Iso_110|I|SPAC24B11.06c	gi|134034948|gb|ABO46009.1|	1.99e-71	139	Fusarium proliferatum
P56|Iso_109,Iso_110|I|SPAC24B11.06c	gi|607977344|gb|EZG06503.1|	2e-71	143	Trichophyton rubrum CBS 735.88
P56|Iso_109,Iso_110|I|SPAC24B11.06c	gi|751681761|gb|KIM31917.1|	2.18e-71	138	Serendipita vermifera MAFF 305830
P56|Iso_109,Iso_110|I|SPAC24B11.06c	gi|607878108|gb|EZF23193.1|	2.49e-71	143	Trichophyton rubrum CBS 118892;Trichophyton rubrum CBS 100081;Trichophyton rubrum CBS 289.86;Trichophyton rubrum CBS 288.86;Trichophyton soudanense CBS 452.61;Trichophyton rubrum CBS 202.88;Trichophyton rubrum D6;Trichophyton rubrum MR850;Trichophyton rubrum MR1448;Trichophyton rubrum MR1459
P56|Iso_109,Iso_110|I|SPAC24B11.06c	gi|51701541|sp|Q750A9.2|HOG1_ASHGO	2.54e-71	138	Ashbya gossypii ATCC 10895
P56|Iso_109,Iso_110|I|SPAC24B11.06c	gi|45201143|ref|NP_986713.1|	2.67e-71	138	Ashbya gossypii ATCC 10895;Ashbya gossypii FDAG1
P56|Iso_109,Iso_110|I|SPAC24B11.06c	gi|751669393|gb|KIM19807.1|	2.73e-71	138	Serendipita vermifera MAFF 305830
P56|Iso_109,Iso_110|I|SPAC24B11.06c	gi|254547282|gb|ACT66701.1|	2.82e-71	145	Ganoderma lucidum
P56|Iso_109,Iso_110|I|SPAC24B11.06c	gi|242217365|ref|XP_002474483.1|	2.83e-71	140	Postia placenta Mad-698-R
P56|Iso_109,Iso_110|I|SPAC24B11.06c	gi|295611|gb|AAA34680.1|	2.98e-71	141	Saccharomyces cerevisiae
P56|Iso_109,Iso_110|I|SPAC24B11.06c	gi|1256876|gb|AAB67558.1|	3e-71	141	Saccharomyces cerevisiae
P56|Iso_109,Iso_110|I|SPAC24B11.06c	gi|584390543|emb|CDK29966.1|	3.04e-71	141	Kuraishia capsulata CBS 1993
P56|Iso_109,Iso_110|I|SPAC24B11.06c	gi|781086270|dbj|GAO15210.1|	3.07e-71	139	Villosiclava virens
P56|Iso_109,Iso_110|I|SPAC24B11.06c	gi|597971193|ref|XP_007360879.1|	3.16e-71	140	Dichomitus squalens LYAD-421 SS1
P56|Iso_109,Iso_110|I|SPAC24B11.06c	gi|918731849|gb|KOG97823.1|	3.33e-71	141	Saccharomyces eubayanus
P56|Iso_109,Iso_110|I|SPAC24B11.06c	gi|6323142|ref|NP_013214.1|	3.34e-71	141	Saccharomyces cerevisiae;Saccharomyces cerevisiae RM11-1a;Saccharomyces cerevisiae YJM789;Saccharomyces cerevisiae YJM326;Saccharomyces cerevisiae YJM451;Saccharomyces cerevisiae AWRI1631;Saccharomyces cerevisiae S288c;Saccharomyces cerevisiae JAY291;Saccharomyces cerevisiae EC1118;Saccharomyces cerevisiae Lalvin QA23;Saccharomyces cerevisiae Vin13;Saccharomyces cerevisiae VL3;Saccharomyces cerev…
P56|Iso_109,Iso_110|I|SPAC24B11.06c	gi|302694675|ref|XP_003037016.1|	3.44e-71	137	Schizophyllum commune H4-8
P56|Iso_109,Iso_110|I|SPAC24B11.06c	gi|607977342|gb|EZG06501.1|	3.48e-71	143	Trichophyton rubrum CBS 735.88
P56|Iso_109,Iso_110|I|SPAC24B11.06c	gi|327300255|ref|XP_003234820.1|	3.63e-71	143	Trichophyton rubrum;Trichophyton rubrum CBS 118892;Trichophyton rubrum CBS 100081;Trichophyton rubrum CBS 289.86;Trichophyton rubrum CBS 288.86;Trichophyton soudanense CBS 452.61;Trichophyton rubrum CBS 202.88;Trichophyton rubrum D6;Trichophyton rubrum MR850;Trichophyton rubrum MR1448;Trichophyton rubrum MR1459
P56|Iso_109,Iso_110|I|SPAC24B11.06c	gi|365764387|gb|EHN05911.1|	3.75e-71	141	Saccharomyces cerevisiae x Saccharomyces kudriavzevii VIN7
P56|Iso_109,Iso_110|I|SPAC24B11.06c	gi|242210409|ref|XP_002471047.1|	4.29e-71	140	Postia placenta Mad-698-R
P56|Iso_109,Iso_110|I|SPAC24B11.06c	gi|353242289|emb|CCA73946.1|	4.44e-71	134	Piriformospora indica DSM 11827
P56|Iso_109,Iso_110|I|SPAC24B11.06c	gi|661920536|gb|AIE40064.1|	4.91e-71	140	Wolfiporia cocos
P56|Iso_109,Iso_110|I|SPAC24B11.06c	gi|401841926|gb|EJT44235.1|	6.46e-71	138	Saccharomyces kudriavzevii IFO 1802
P56|Iso_109,Iso_110|I|SPAC24B11.06c	gi|667720220|gb|KFA62534.1|	6.77e-71	139	Stachybotrys chlorohalonata IBT 40285
P56|Iso_109,Iso_110|I|SPAC24B11.06c	gi|666399217|gb|KEY65060.1|	6.77e-71	139	Stachybotrys chartarum IBT 7711;Stachybotrys chartarum IBT 40293;Stachybotrys chartarum IBT 40288
P56|Iso_109,Iso_110|I|SPAC24B11.06c	gi|908569031|gb|KND98656.1|	7.17e-71	146	Candida auris
P56|Iso_109,Iso_110|I|SPAC24B11.06c	gi|595488750|gb|EXX73661.1|	7.72e-71	136	Rhizophagus irregularis DAOM 197198w
P56|Iso_109,Iso_110|I|SPAC24B11.06c	gi|50311899|ref|XP_455981.1|	9.58e-71	140	Kluyveromyces lactis;Kluyveromyces lactis NRRL Y-1140
P56|Iso_109,Iso_110|I|SPAC24B11.06c	gi|927373155|ref|XP_013932428.1|	1.04e-70	140	Ogataea polymorpha;Ogataea parapolymorpha DL-1
P56|Iso_109,Iso_110|I|SPAC24B11.06c	gi|646386042|gb|KDQ51128.1|	1.11e-70	138	Jaapia argillacea MUCL 33604
P56|Iso_109,Iso_110|I|SPAC24B11.06c	gi|630342361|ref|XP_007860481.1|	1.21e-70	138	Gloeophyllum trabeum ATCC 11539
P56|Iso_109,Iso_110|I|SPAC24B11.06c	gi|383210158|dbj|BAM08274.1|	1.38e-70	143	Trichosporonoides megachiliensis
P56|Iso_109,Iso_110|I|SPAC24B11.06c	gi|563295441|gb|ESZ95684.1|	1.39e-70	137	Sclerotinia borealis F-4157
P56|Iso_109,Iso_110|I|SPAC24B11.06c	gi|751029991|gb|KIK71682.1|	1.48e-70	137	Gymnopus luxurians FD-317 M1
P56|Iso_109,Iso_110|I|SPAC24B11.06c	gi|913784103|emb|CRK22994.1|	1.49e-70	139	Verticillium longisporum
P56|Iso_109,Iso_110|I|SPAC24B11.06c	gi|361131297|gb|EHL02995.1|	1.55e-70	136	Glarea lozoyensis 74030
P56|Iso_109,Iso_110|I|SPAC24B11.06c	gi|913769433|emb|CRK33388.1|	1.56e-70	139	Verticillium longisporum
P56|Iso_109,Iso_110|I|SPAC24B11.06c	gi|827765583|gb|KLO20163.1|	1.71e-70	145	Schizopora paradoxa
P56|Iso_109,Iso_110|I|SPAC24B11.06c	gi|754371605|gb|KIP04342.1|	2e-70	140	Phlebiopsis gigantea 11061_1 CR5-6
P56|Iso_109,Iso_110|I|SPAC24B11.06c	gi|820654273|emb|CDZ96225.1|	2.09e-70	141	Xanthophyllomyces dendrorhous
P56|Iso_109,Iso_110|I|SPAC24B11.06c	gi|134077216|emb|CAK45557.1|	2.23e-70	129	Aspergillus niger
P56|Iso_109,Iso_110|I|SPAC24B11.06c	gi|972234064|emb|CEN62623.1|	2.29e-70	156	Aspergillus calidoustus
P56|Iso_109,Iso_110|I|SPAC24B11.06c	gi|729704918|emb|CEI98443.1|	2.37e-70	140	Rhizopus microsporus
P56|Iso_109,Iso_110|I|SPAC24B11.06c	gi|595784908|ref|XP_007270997.1|	2.79e-70	138	Fomitiporia mediterranea MF3/22
P56|Iso_109,Iso_110|I|SPAC24B11.06c	gi|727147959|emb|CEG69741.1|	2.9e-70	140	Rhizopus microsporus
P56|Iso_109,Iso_110|I|SPAC24B11.06c	gi|401624662|gb|EJS42714.1|	2.99e-70	140	Saccharomyces arboricola H-6
P56|Iso_109,Iso_110|I|SPAC24B11.06c	gi|818153448|gb|KKO96421.1|	3.08e-70	144	Trichoderma harzianum
P56|Iso_109,Iso_110|I|SPAC24B11.06c	gi|4239817|emb|CAA10714.1|	3.15e-70	140	Zygosaccharomyces rouxii
P56|Iso_109,Iso_110|I|SPAC24B11.06c	gi|807749067|ref|XP_012179328.1|	3.16e-70	140	Fibroporia radiculosa
P56|Iso_109,Iso_110|I|SPAC24B11.06c	gi|573982981|ref|XP_006669411.1|	3.92e-70	140	Cordyceps militaris CM01
P56|Iso_109,Iso_110|I|SPAC24B11.06c	gi|449539865|gb|EMD30869.1|	4.66e-70	140	Ceriporiopsis subvermispora B
P56|Iso_109,Iso_110|I|SPAC24B11.06c	gi|158633421|gb|ABW75775.1|	5.35e-70	139	Epichloe festucae
P56|Iso_109,Iso_110|I|SPAC24B11.06c	gi|326485387|gb|EGE09397.1|	5.41e-70	143	Trichophyton equinum CBS 127.97
P56|Iso_109,Iso_110|I|SPAC24B11.06c	gi|748545271|emb|CDO96287.1|	5.72e-70	140	Kluyveromyces dobzhanskii CBS 2104
P56|Iso_109,Iso_110|I|SPAC24B11.06c	gi|410076294|ref|XP_003955729.1|	6.86e-70	138	Kazachstania africana CBS 2517
P56|Iso_109,Iso_110|I|SPAC24B11.06c	gi|121772932|sp|Q1L5Z8.1|HOG1_TORDE	7.03e-70	140	Torulaspora delbrueckii
P56|Iso_109,Iso_110|I|SPAC24B11.06c	gi|366991855|ref|XP_003675693.1|	7.29e-70	140	Naumovozyma castellii CBS 4309
P56|Iso_109,Iso_110|I|SPAC24B11.06c	gi|254581436|ref|XP_002496703.1|	7.35e-70	140	Zygosaccharomyces rouxii;Zygosaccharomyces rouxii CBS 732
P56|Iso_109,Iso_110|I|SPAC24B11.06c	gi|367015904|ref|XP_003682451.1|	7.41e-70	140	Torulaspora delbrueckii
P56|Iso_109,Iso_110|I|SPAC24B11.06c	gi|384489839|gb|EIE81061.1|	7.52e-70	140	Rhizopus delemar RA 99-880
P56|Iso_109,Iso_110|I|SPAC24B11.06c	gi|448113080|ref|XP_004202261.1|	8.12e-70	141	Millerozyma farinosa CBS 7064
P56|Iso_109,Iso_110|I|SPAC24B11.06c	gi|574142407|dbj|BAO40199.1|	9.41e-70	140	Kluyveromyces marxianus DMKU3-1042
P56|Iso_109,Iso_110|I|SPAC24B11.06c	gi|729186001|emb|CEJ84183.1|	1.03e-69	139	Torrubiella hemipterigena
P56|Iso_109,Iso_110|I|SPAC24B11.06c	gi|187235715|gb|ACD02022.1|	1.06e-69	140	Kluyveromyces marxianus
P56|Iso_109,Iso_110|I|SPAC24B11.06c	gi|636760489|ref|XP_008082418.1|	1.22e-69	132	Glarea lozoyensis ATCC 20868
P56|Iso_109,Iso_110|I|SPAC24B11.06c	gi|448115697|ref|XP_004202883.1|	1.67e-69	141	Millerozyma farinosa CBS 7064
P56|Iso_109,Iso_110|I|SPAC24B11.06c	gi|403216792|emb|CCK71288.1|	2.02e-69	140	Kazachstania naganishii CBS 8797
P56|Iso_109,Iso_110|I|SPAC24B11.06c	gi|758360079|emb|CEP17527.1|	2.08e-69	140	Parasitella parasitica
P56|Iso_109,Iso_110|I|SPAC24B11.06c	gi|511011765|gb|EPB92970.1|	2.58e-69	140	Mucor circinelloides f. circinelloides 1006PhL
P56|Iso_109,Iso_110|I|SPAC24B11.06c	gi|758347970|dbj|GAN09720.1|	2.96e-69	140	Mucor ambiguus
P56|Iso_109,Iso_110|I|SPAC24B11.06c	gi|255937117|ref|XP_002559585.1|	3.39e-69	129	Penicillium chrysogenum Wisconsin 54-1255
P56|Iso_109,Iso_110|I|SPAC24B11.06c	gi|156846391|ref|XP_001646083.1|	4e-69	140	Vanderwaltozyma polyspora DSM 70294
P56|Iso_109,Iso_110|I|SPAC24B11.06c	gi|761758946|emb|CEP63227.1|	5.61e-69	143	Lachancea lanzarotensis
P56|Iso_109,Iso_110|I|SPAC24B11.06c	gi|907098282|gb|KND03656.1|	6.57e-69	137	Spizellomyces punctatus DAOM BR117
P56|Iso_109,Iso_110|I|SPAC24B11.06c	gi|930146600|ref|XP_014173706.1|	1.06e-68	140	Grosmannia clavigera kw1407
P56|Iso_109,Iso_110|I|SPAC24B11.06c	gi|575520039|ref|XP_006689290.1|	1.74e-68	141	Candida tenuis ATCC 10573
P56|Iso_109,Iso_110|I|SPAC24B11.06c	gi|955268361|gb|KSA00661.1|	1.85e-68	141	Debaryomyces fabryi
P56|Iso_109,Iso_110|I|SPAC24B11.06c	gi|399168036|emb|CCE31189.1|	2.22e-68	144	Claviceps purpurea 20.1
P56|Iso_109,Iso_110|I|SPAC24B11.06c	gi|985623284|gb|AMD18956.1|	2.54e-68	138	Eremothecium sinecaudum
P56|Iso_109,Iso_110|I|SPAC24B11.06c	gi|294657909|ref|XP_460213.2|	2.96e-68	141	Debaryomyces hansenii CBS767
P56|Iso_109,Iso_110|I|SPAC24B11.06c	gi|320034440|gb|EFW16384.1|	3.29e-68	144	Coccidioides posadasii str. Silveira
P56|Iso_109,Iso_110|I|SPAC24B11.06c	gi|190319369|gb|AAF24231.2|AF185278_1	3.41e-68	141	Debaryomyces hansenii
P56|Iso_109,Iso_110|I|SPAC24B11.06c	gi|74676018|sp|O59853.1|HOG2_ZYGRO	4.02e-68	140	Zygosaccharomyces rouxii
P56|Iso_109,Iso_110|I|SPAC24B11.06c	gi|149248820|ref|XP_001528797.1|	4.45e-68	140	Lodderomyces elongisporus NRRL YB-4239
P56|Iso_109,Iso_110|I|SPAC24B11.06c	gi|241951128|ref|XP_002418286.1|	4.64e-68	139	Candida dubliniensis CD36
P56|Iso_109,Iso_110|I|SPAC24B11.06c	gi|384501772|gb|EIE92263.1|	6.93e-68	143	Rhizopus delemar RA 99-880
P56|Iso_109,Iso_110|I|SPAC24B11.06c	gi|444322596|ref|XP_004181939.1|	7.94e-68	141	Tetrapisispora blattae CBS 6284
P56|Iso_109,Iso_110|I|SPAC24B11.06c	gi|70724705|gb|AAZ07867.1|	1.25e-67	123	Cryptococcus gattii
P56|Iso_109,Iso_110|I|SPAC24B11.06c	gi|459373812|gb|EMG50916.1|	2.08e-67	151	Candida maltosa Xu316
P56|Iso_109,Iso_110|I|SPAC24B11.06c	gi|729714711|emb|CEI88999.1|	2.78e-67	140	Rhizopus microsporus
P56|Iso_109,Iso_110|I|SPAC24B11.06c	gi|607977345|gb|EZG06504.1|	4.02e-67	133	Trichophyton rubrum CBS 735.88
P56|Iso_109,Iso_110|I|SPAC24B11.06c	gi|607878109|gb|EZF23194.1|	4.63e-67	133	Trichophyton rubrum CBS 100081;Trichophyton rubrum CBS 289.86;Trichophyton rubrum CBS 288.86;Trichophyton soudanense CBS 452.61;Trichophyton rubrum CBS 202.88;Trichophyton rubrum D6;Trichophyton rubrum MR850;Trichophyton rubrum MR1459
P56|Iso_109,Iso_110|I|SPAC24B11.06c	gi|150864140|ref|XP_001382848.2|	4.89e-67	143	Scheffersomyces stipitis CBS 6054
P56|Iso_109,Iso_110|I|SPAC24B11.06c	gi|255723894|ref|XP_002546876.1|	5.78e-67	139	Candida tropicalis MYA-3404
P56|Iso_109,Iso_110|I|SPAC24B11.06c	gi|748551855|dbj|GAM42933.1|	6.26e-67	129	Talaromyces cellulolyticus
P56|Iso_109,Iso_110|I|SPAC24B11.06c	gi|74676019|sp|O59854.1|HOG1_ZYGRO	7.72e-67	141	Zygosaccharomyces rouxii
P56|Iso_109,Iso_110|I|SPAC24B11.06c	gi|146414215|ref|XP_001483078.1|	8.24e-67	141	Meyerozyma guilliermondii ATCC 6260
P56|Iso_109,Iso_110|I|SPAC24B11.06c	gi|448513402|ref|XP_003866941.1|	8.79e-67	140	Candida orthopsilosis Co 90-125
P56|Iso_109,Iso_110|I|SPAC24B11.06c	gi|410730221|ref|XP_003671290.2|	8.95e-67	140	Naumovozyma dairenensis CBS 421
P56|Iso_109,Iso_110|I|SPAC24B11.06c	gi|354546808|emb|CCE43540.1|	9.01e-67	140	Candida parapsilosis
P56|Iso_109,Iso_110|I|SPAC24B11.06c	gi|607977343|gb|EZG06502.1|	9.23e-67	133	Trichophyton rubrum CBS 735.88
P56|Iso_109,Iso_110|I|SPAC24B11.06c	gi|607878107|gb|EZF23192.1|	1.02e-66	133	Trichophyton rubrum CBS 100081;Trichophyton rubrum CBS 289.86;Trichophyton rubrum CBS 288.86;Trichophyton soudanense CBS 452.61;Trichophyton rubrum CBS 202.88;Trichophyton rubrum D6;Trichophyton rubrum MR850;Trichophyton rubrum MR1459
P56|Iso_109,Iso_110|I|SPAC24B11.06c	gi|913864411|gb|KNZ56128.1|	1.76e-66	153	Puccinia sorghi
P56|Iso_109,Iso_110|I|SPAC24B11.06c	gi|478786343|gb|AGJ70259.1|	2.59e-66	116	Sporobolomyces carnicolor
P56|Iso_109,Iso_110|I|SPAC24B11.06c	gi|902265636|emb|CRL30907.1|	3.38e-66	139	Penicillium camemberti
P56|Iso_109,Iso_110|I|SPAC24B11.06c	gi|68469771|ref|XP_721137.1|	6.42e-66	139	Candida albicans SC5314;Candida albicans WO-1;Candida albicans P94015;Candida albicans P60002;Candida albicans P34048;Candida albicans P78042
P56|Iso_109,Iso_110|I|SPAC24B11.06c	gi|703970838|gb|KGQ99949.1|	6.49e-66	139	Candida albicans P87;Candida albicans GC75;Candida albicans P57072;Candida albicans P75010;Candida albicans P76055;Candida albicans P76067;Candida albicans Ca6
P56|Iso_109,Iso_110|I|SPAC24B11.06c	gi|953383973|ref|XP_014536255.1|	9.95e-66	132	Penicillium digitatum Pd1
P56|Iso_109,Iso_110|I|SPAC24B11.06c	gi|607887428|gb|EZF28832.1|	1.09e-65	133	Trichophyton interdigitale H6;Trichophyton interdigitale MR816
P56|Iso_109,Iso_110|I|SPAC24B11.06c	gi|1616583|emb|CAA62214.1|	1.15e-65	139	Candida albicans;Candida albicans SC5314;Candida albicans 12C;Candida albicans L26;Candida albicans P37005;Candida albicans 19F;Candida albicans P78048;Candida albicans P37037;Candida albicans P37039;Candida albicans P57055;Candida albicans P75063
P56|Iso_109,Iso_110|I|SPAC24B11.06c	gi|723198521|gb|KHC72251.1|	1.16e-65	139	Candida albicans P75016
P56|Iso_109,Iso_110|I|SPAC24B11.06c	gi|598068325|ref|XP_007374991.1|	1.2e-65	140	Spathaspora passalidarum NRRL Y-27907
P56|Iso_109,Iso_110|I|SPAC24B11.06c	gi|598030899|ref|XP_007344822.1|	1.94e-65	141	Auricularia delicata TFB-10046 SS5
P56|Iso_109,Iso_110|I|SPAC24B11.06c	gi|697073163|ref|XP_009651302.1|	2.72e-65	137	Verticillium dahliae VdLs.17
P56|Iso_109,Iso_110|I|SPAC24B11.06c	gi|315048031|ref|XP_003173390.1|	3.66e-65	158	Arthroderma gypseum CBS 118893
P56|Iso_109,Iso_110|I|SPAC24B11.06c	gi|296809519|ref|XP_002845098.1|	5.54e-65	143	Arthroderma otae CBS 113480
P56|Iso_109,Iso_110|I|SPAC24B11.06c	gi|478786328|gb|AGJ70254.1|	7.79e-65	116	Aspergillus tubingensis
P56|Iso_109,Iso_110|I|SPAC24B11.06c	gi|478786090|gb|AGJ70185.1|	1.67e-64	116	Aspergillus versicolor;Aspergillus sydowii
P56|Iso_109,Iso_110|I|SPAC24B11.06c	gi|478786316|gb|AGJ70250.1|	1.92e-64	116	Sporobolomyces carnicolor
P56|Iso_109,Iso_110|I|SPAC24B11.06c	gi|478786169|gb|AGJ70213.1|	2.28e-64	120	Aporospora terricola
P56|Iso_109,Iso_110|I|SPAC24B11.06c	gi|478786103|gb|AGJ70188.1|	3.71e-64	120	Lophiostoma compressum
P56|Iso_109,Iso_110|I|SPAC24B11.06c	gi|478786166|gb|AGJ70212.1|	4.25e-64	116	Talaromyces radicus
P56|Iso_109,Iso_110|I|SPAC24B11.06c	gi|478786136|gb|AGJ70202.1|	4.42e-64	120	Aspergillus restrictus
P56|Iso_109,Iso_110|I|SPAC24B11.06c	gi|588258990|ref|XP_006958653.1|	6.5e-64	139	Wallemia sebi CBS 633.66
P56|Iso_109,Iso_110|I|SPAC24B11.06c	gi|635377412|sp|A3EZ55.2|HOG1A_WALI9	7.01e-64	139	Wallemia ichthyophaga;Wallemia ichthyophaga EXF-994
P56|Iso_109,Iso_110|I|SPAC24B11.06c	gi|478786131|gb|AGJ70201.1|	9.73e-64	114	Aspergillus sydowii
P56|Iso_109,Iso_110|I|SPAC24B11.06c	gi|478786123|gb|AGJ70197.1|	1.19e-63	120	Alternaria tenuissima
P56|Iso_109,Iso_110|I|SPAC24B11.06c	gi|478786175|gb|AGJ70215.1|	1.65e-63	120	Chaetomium ancistrocladum
P56|Iso_109,Iso_110|I|SPAC24B11.06c	gi|478786319|gb|AGJ70251.1|	1.86e-63	116	Aspergillus versicolor
P56|Iso_109,Iso_110|I|SPAC24B11.06c	gi|478786111|gb|AGJ70191.1|	1.9e-63	120	Cladosporium oxysporum
P56|Iso_109,Iso_110|I|SPAC24B11.06c	gi|478786178|gb|AGJ70216.1|	4.21e-63	116	Penicillium charlesii;Penicillium fellutanum
P56|Iso_109,Iso_110|I|SPAC24B11.06c	gi|685944992|ref|XP_009267199.1|	7.26e-63	139	Wallemia ichthyophaga EXF-994
P56|Iso_109,Iso_110|I|SPAC24B11.06c	gi|478786093|gb|AGJ70186.1|	1.16e-62	116	Aspergillus sp. SL-7
P56|Iso_109,Iso_110|I|SPAC24B11.06c	gi|478786334|gb|AGJ70256.1|	1.17e-62	116	Preussia australis
P56|Iso_109,Iso_110|I|SPAC24B11.06c	gi|478786296|gb|AGJ70244.1|	2.13e-62	116	Penicillium citrinum
P56|Iso_109,Iso_110|I|SPAC24B11.06c	gi|478786187|gb|AGJ70219.1|	2.27e-62	116	Stagonosporopsis cucurbitacearum
P56|Iso_109,Iso_110|I|SPAC24B11.06c	gi|478786355|gb|AGJ70263.1|	2.67e-62	116	Aporospora terricola
P56|Iso_109,Iso_110|I|SPAC24B11.06c	gi|478786290|gb|AGJ70242.1|	2.7e-62	116	Xylariales sp. MS-73
P56|Iso_109,Iso_110|I|SPAC24B11.06c	gi|478786084|gb|AGJ70183.1|	3.86e-62	116	Penicillium chrysogenum
P56|Iso_109,Iso_110|I|SPAC24B11.06c	gi|478786322|gb|AGJ70252.1|	3.91e-62	116	fungal sp. SL-86
P56|Iso_109,Iso_110|I|SPAC24B11.06c	gi|478786073|gb|AGJ70181.1|	4.08e-62	116	Phoma betae;Pleosporales sp. AH-1;Pleosporales sp. AH-32;Pleosporales sp. AH-58;Pleosporales sp. AH-64;Pleosporales sp. AH-77;Pleosporales sp. MS-72
P56|Iso_109,Iso_110|I|SPAC24B11.06c	gi|478786076|gb|AGJ70182.1|	4.22e-62	116	Penicillium chrysogenum;Penicillium lanosum
P56|Iso_109,Iso_110|I|SPAC24B11.06c	gi|478786219|gb|AGJ70229.1|	4.27e-62	116	Penicillium oxalicum
P56|Iso_109,Iso_110|I|SPAC24B11.06c	gi|478786269|gb|AGJ70235.1|	6.81e-62	116	Penicillium polonicum
P56|Iso_109,Iso_110|I|SPAC24B11.06c	gi|478786352|gb|AGJ70262.1|	9.05e-62	114	Bullera alba
P56|Iso_109,Iso_110|I|SPAC24B11.06c	gi|478786148|gb|AGJ70206.1|	1.22e-61	116	Alternaria tenuissima
P56|Iso_109,Iso_110|I|SPAC24B11.06c	gi|150387837|sp|A3EZ53.1|HOG1_WALMU	1.43e-61	133	Wallemia muriae
P56|Iso_109,Iso_110|I|SPAC24B11.06c	gi|478786109|gb|AGJ70190.1|	1.61e-61	116	fungal sp. SL-12;Microascus sp. SL-82
P56|Iso_109,Iso_110|I|SPAC24B11.06c	gi|478786284|gb|AGJ70240.1|	1.68e-61	116	Chaetomium ancistrocladum
P56|Iso_109,Iso_110|I|SPAC24B11.06c	gi|478786184|gb|AGJ70218.1|	1.71e-61	116	Chrysosporium lobatum
P56|Iso_109,Iso_110|I|SPAC24B11.06c	gi|478786129|gb|AGJ70200.1|	2.2e-61	116	Aspergillus restrictus;Penicillium chrysogenum
P56|Iso_109,Iso_110|I|SPAC24B11.06c	gi|38710251|gb|AAR27329.1|	2.54e-61	120	Fusarium verticillioides
P56|Iso_109,Iso_110|I|SPAC24B11.06c	gi|478786281|gb|AGJ70239.1|	2.86e-61	116	Eurotium amstelodami
P56|Iso_109,Iso_110|I|SPAC24B11.06c	gi|478786337|gb|AGJ70257.1|	3.08e-61	116	Cladosporium cladosporioides
P56|Iso_109,Iso_110|I|SPAC24B11.06c	gi|478786100|gb|AGJ70187.1|	3.51e-61	116	Pseudocercosporella fraxini
P56|Iso_109,Iso_110|I|SPAC24B11.06c	gi|478786349|gb|AGJ70261.1|	4.51e-61	116	Cladosporium herbarum
P56|Iso_109,Iso_110|I|SPAC24B11.06c	gi|478786212|gb|AGJ70227.1|	4.66e-61	116	fungal sp. SL-57
P56|Iso_109,Iso_110|I|SPAC24B11.06c	gi|150387838|sp|A3EZ54.1|HOG1_WALSE	5.29e-61	133	Wallemia sebi
P56|Iso_109,Iso_110|I|SPAC24B11.06c	gi|751750463|gb|KIM98645.1|	7.54e-61	138	Oidiodendron maius Zn
P56|Iso_109,Iso_110|I|SPAC24B11.06c	gi|478786325|gb|AGJ70253.1|	1.02e-60	116	Trichoderma atroviride
P56|Iso_109,Iso_110|I|SPAC24B11.06c	gi|478786331|gb|AGJ70255.1|	1.12e-60	116	Myxotrichum deflexum
P56|Iso_109,Iso_110|I|SPAC24B11.06c	gi|478786113|gb|AGJ70192.1|	1.52e-60	116	Pleosporales sp. SL-14
P56|Iso_109,Iso_110|I|SPAC24B11.06c	gi|478786125|gb|AGJ70198.1|	1.84e-60	120	Stachybotrys chartarum
P56|Iso_109,Iso_110|I|SPAC24B11.06c	gi|478786151|gb|AGJ70207.1|	2.57e-60	116	Fusarium equiseti;Fusarium chlamydosporum
P56|Iso_109,Iso_110|I|SPAC24B11.06c	gi|478786087|gb|AGJ70184.1|	2.68e-60	116	Trichoderma longibrachiatum
P56|Iso_109,Iso_110|I|SPAC24B11.06c	gi|478786117|gb|AGJ70194.1|	3.44e-60	116	Scopulariopsis hibernica
P56|Iso_109,Iso_110|I|SPAC24B11.06c	gi|478786121|gb|AGJ70196.1|	3.63e-60	116	Chaetomium globosum
P56|Iso_109,Iso_110|I|SPAC24B11.06c	gi|478786209|gb|AGJ70226.1|	3.85e-60	114	fungal sp. SL-55
P56|Iso_109,Iso_110|I|SPAC24B11.06c	gi|478786275|gb|AGJ70237.1|	4.71e-60	116	Aspergillus conicus
P56|Iso_109,Iso_110|I|SPAC24B11.06c	gi|478786142|gb|AGJ70204.1|	5.03e-60	116	Thielavia basicola
P56|Iso_109,Iso_110|I|SPAC24B11.06c	gi|563287610|gb|EGU11446.2|	5.73e-60	129	Rhodotorula glutinis ATCC 204091
P56|Iso_109,Iso_110|I|SPAC24B11.06c	gi|478786119|gb|AGJ70195.1|	9.14e-60	116	Hypocreales sp. SL-17;Hypocreales sp. SL-33;Hypocreales sp. SL-45
P56|Iso_109,Iso_110|I|SPAC24B11.06c	gi|125743005|gb|ABN54705.1|	1.79e-58	134	Wallemia ichthyophaga
P56|Iso_109,Iso_110|I|SPAC24B11.06c	gi|478786302|gb|AGJ70246.1|	9.86e-58	116	Bjerkandera adusta;Thanatephorus cucumeris
P56|Iso_109,Iso_110|I|SPAC24B11.06c	gi|800922119|gb|KKA03597.1|	1.12e-57	140	Hanseniaspora uvarum DSM 2768
P56|Iso_109,Iso_110|I|SPAC24B11.06c	gi|148886593|sp|Q0CIC7.2|MPKC_ASPTN	2.03e-57	139	Aspergillus terreus NIH2624
P56|Iso_109,Iso_110|I|SPAC24B11.06c	gi|909137307|gb|KNE62993.1|	3.09e-57	136	Allomyces macrogynus ATCC 38327
P56|Iso_109,Iso_110|I|SPAC24B11.06c	gi|115400293|ref|XP_001215735.1|	4.57e-57	139	Aspergillus terreus NIH2624
P56|Iso_109,Iso_110|I|SPAC24B11.06c	gi|478786145|gb|AGJ70205.1|	1.09e-56	116	Hypocreales sp. SL-28;Simplicillium sp. SL-95
P56|Iso_109,Iso_110|I|SPAC24B11.06c	gi|639557653|gb|KDN35725.1|	1.75e-56	105	Rhizoctonia solani AG-8 WAC10335
P56|Iso_109,Iso_110|I|SPAC24B11.06c	gi|478786293|gb|AGJ70243.1|	4.75e-56	116	fungal sp. SL-74
P56|Iso_109,Iso_110|I|SPAC24B11.06c	gi|909136065|gb|KNE61994.1|	2.01e-54	134	Allomyces macrogynus ATCC 38327
P56|Iso_109,Iso_110|I|SPAC24B11.06c	gi|666431609|gb|KEY79210.1|	1.84e-53	141	Aspergillus fumigatus var. RP-2014
P56|Iso_109,Iso_110|I|SPAC24B11.06c	gi|121713066|ref|XP_001274144.1|	1.87e-53	141	Aspergillus clavatus NRRL 1
P56|Iso_109,Iso_110|I|SPAC24B11.06c	gi|924886159|gb|KOS42242.1|	2.14e-53	145	Penicillium nordicum
P56|Iso_109,Iso_110|I|SPAC24B11.06c	gi|846913722|gb|KMK59550.1|	3.49e-53	141	Aspergillus fumigatus Z5
P56|Iso_109,Iso_110|I|SPAC24B11.06c	gi|145237666|ref|XP_001391480.1|	4.46e-53	138	Aspergillus niger;Aspergillus niger ATCC 1015;Aspergillus niger CBS 513.88
P56|Iso_109,Iso_110|I|SPAC24B11.06c	gi|391867067|gb|EIT76320.1|	6.83e-53	140	Aspergillus oryzae 3.042
P56|Iso_109,Iso_110|I|SPAC24B11.06c	gi|972239240|emb|CEL02952.1|	7.57e-53	140	Aspergillus calidoustus
P222|Iso_400|I|SPAC13C5.05c	gi|906317196|emb|CEP22961.1|	8.91e-157	506	Cyberlindnera jadinii
P222|Iso_400|I|SPAC13C5.05c	gi|813207037|dbj|GAO51668.1|	2.24e-155	511	Saitoella complicata NRRL Y-17804
P222|Iso_400|I|SPAC13C5.05c	gi|50554299|ref|XP_504558.1|	3.12e-154	503	Yarrowia lipolytica CLIB122
P222|Iso_400|I|SPAC13C5.05c	gi|751758531|gb|KIN06705.1|	2.01e-152	515	Oidiodendron maius Zn
P222|Iso_400|I|SPAC13C5.05c	gi|924818267|gb|KOS16398.1|	2.34e-151	508	Malassezia pachydermatis
P222|Iso_400|I|SPAC13C5.05c	gi|754420331|ref|XP_011277641.1|	6.33e-151	513	Wickerhamomyces ciferrii
P222|Iso_400|I|SPAC13C5.05c	gi|752349263|gb|KIO08320.1|	9.83e-151	508	Pisolithus tinctorius Marx 270
P222|Iso_400|I|SPAC13C5.05c	gi|682309805|gb|KFY18308.1|	2.64e-150	515	Pseudogymnoascus pannorum VKM F-3775
P222|Iso_400|I|SPAC13C5.05c	gi|748492727|ref|XP_011119705.1|	3.49e-150	503	Arthrobotrys oligospora ATCC 24927
P222|Iso_400|I|SPAC13C5.05c	gi|748499513|ref|XP_011110345.1|	6.67e-150	504	Dactylellina haptotyla CBS 200.50
P222|Iso_400|I|SPAC13C5.05c	gi|615427574|ref|XP_007588683.1|	8.49e-150	512	Neofusicoccum parvum UCRNP2
P222|Iso_400|I|SPAC13C5.05c	gi|682457149|gb|KFZ14801.1|	9.99e-150	515	Pseudogymnoascus pannorum VKM F-4520 (FW-2644)
P222|Iso_400|I|SPAC13C5.05c	gi|821061884|gb|KKY17310.1|	1.15e-149	513	Diplodia seriata
P222|Iso_400|I|SPAC13C5.05c	gi|407927012|gb|EKG19917.1|	1.32e-149	512	Macrophomina phaseolina MS6
P222|Iso_400|I|SPAC13C5.05c	gi|682406968|gb|KFY82046.1|	1.59e-149	515	Pseudogymnoascus pannorum VKM F-4518 (FW-2643)
P222|Iso_400|I|SPAC13C5.05c	gi|682391108|gb|KFY70958.1|	2.27e-149	511	Pseudogymnoascus pannorum VKM F-103
P222|Iso_400|I|SPAC13C5.05c	gi|682331682|gb|KFY30604.1|	2.98e-149	515	Pseudogymnoascus pannorum VKM F-4281 (FW-2241)
P222|Iso_400|I|SPAC13C5.05c	gi|343425868|emb|CBQ69401.1|	3.42e-149	508	Sporisorium reilianum SRZ2
P222|Iso_400|I|SPAC13C5.05c	gi|599348493|ref|XP_007390535.1|	3.45e-149	507	Phanerochaete carnosa HHB-10118-sp
P222|Iso_400|I|SPAC13C5.05c	gi|682309188|gb|KFY17893.1|	3.5e-149	516	Pseudogymnoascus pannorum VKM F-4246
P222|Iso_400|I|SPAC13C5.05c	gi|936526803|emb|CDO55558.1|	4.57e-149	505	Galactomyces candidum
P222|Iso_400|I|SPAC13C5.05c	gi|682348224|gb|KFY40709.1|	6.14e-149	512	Pseudogymnoascus pannorum VKM F-4514 (FW-929);Pseudogymnoascus pannorum VKM F-4516 (FW-969)
P222|Iso_400|I|SPAC13C5.05c	gi|682414411|gb|KFY85846.1|	9.27e-149	515	Pseudogymnoascus pannorum VKM F-4517 (FW-2822)
P222|Iso_400|I|SPAC13C5.05c	gi|682365810|gb|KFY52364.1|	9.58e-149	515	Pseudogymnoascus pannorum VKM F-4515 (FW-2607)
P222|Iso_400|I|SPAC13C5.05c	gi|751719519|gb|KIM68511.1|	1.07e-148	508	Scleroderma citrinum Foug A
P222|Iso_400|I|SPAC13C5.05c	gi|682336830|gb|KFY33257.1|	1.19e-148	516	Pseudogymnoascus pannorum VKM F-4513 (FW-928)
P222|Iso_400|I|SPAC13C5.05c	gi|661188674|emb|CDH49521.1|	1.28e-148	506	Lichtheimia corymbifera JMRC:FSU:9682
P222|Iso_400|I|SPAC13C5.05c	gi|595774314|ref|XP_007265700.1|	1.56e-148	506	Fomitiporia mediterranea MF3/22
P222|Iso_400|I|SPAC13C5.05c	gi|758349010|dbj|GAN08729.1|	1.81e-148	509	Mucor ambiguus
P222|Iso_400|I|SPAC13C5.05c	gi|682436960|gb|KFZ01446.1|	2.16e-148	511	Pseudogymnoascus pannorum VKM F-4519 (FW-2642)
P222|Iso_400|I|SPAC13C5.05c	gi|682261495|gb|KFX88897.1|	2.35e-148	516	Pseudogymnoascus pannorum VKM F-3808
P222|Iso_400|I|SPAC13C5.05c	gi|597586799|ref|XP_007296456.1|	3.02e-148	511	Marssonina brunnea f. sp. 'multigermtubi' MB_m1
P222|Iso_400|I|SPAC13C5.05c	gi|831343896|ref|XP_012741798.1|	3.86e-148	511	Pseudogymnoascus destructans 20631-21
P222|Iso_400|I|SPAC13C5.05c	gi|761929474|gb|KIY50454.1|	3.94e-148	507	Fistulina hepatica ATCC 64428
P222|Iso_400|I|SPAC13C5.05c	gi|164659666|ref|XP_001730957.1|	6e-148	504	Malassezia globosa CBS 7966
P222|Iso_400|I|SPAC13C5.05c	gi|599093663|ref|XP_007378714.1|	1.06e-147	507	Punctularia strigosozonata HHB-11173 SS5
P222|Iso_400|I|SPAC13C5.05c	gi|858058258|emb|CDR99411.1|	1.41e-147	508	Sporisorium scitamineum
P222|Iso_400|I|SPAC13C5.05c	gi|347832016|emb|CCD47713.1|	1.42e-147	519	Botryotinia fuckeliana T4;Botryotinia fuckeliana BcDW1
P222|Iso_400|I|SPAC13C5.05c	gi|384485911|gb|EIE78091.1|	1.79e-147	506	Rhizopus delemar RA 99-880
P222|Iso_400|I|SPAC13C5.05c	gi|701694402|gb|EEH39742.2|	1.91e-147	510	Paracoccidioides sp. 'lutzii' Pb01
P222|Iso_400|I|SPAC13C5.05c	gi|511005112|gb|EPB86460.1|	2.16e-147	505	Mucor circinelloides f. circinelloides 1006PhL
P222|Iso_400|I|SPAC13C5.05c	gi|598009837|ref|XP_007336720.1|	2.93e-147	507	Auricularia delicata TFB-10046 SS5
P222|Iso_400|I|SPAC13C5.05c	gi|682271431|gb|KFX95269.1|	3.99e-147	516	Pseudogymnoascus pannorum VKM F-3557
P222|Iso_400|I|SPAC13C5.05c	gi|630173150|ref|XP_007842784.1|	8.72e-147	505	Moniliophthora roreri MCA 2997
P222|Iso_400|I|SPAC13C5.05c	gi|672820239|gb|KFH65136.1|	9.96e-147	505	Mortierella verticillata NRRL 6337
P222|Iso_400|I|SPAC13C5.05c	gi|671689560|emb|CDS03877.1|	1.41e-146	506	Lichtheimia ramosa
P222|Iso_400|I|SPAC13C5.05c	gi|752277174|dbj|GAM88073.1|	1.46e-146	510	fungal sp. No.11243
P222|Iso_400|I|SPAC13C5.05c	gi|557999748|gb|EST09172.1|	2.52e-146	509	Pseudozyma brasiliensis GHG001
P222|Iso_400|I|SPAC13C5.05c	gi|443894124|dbj|GAC71474.1|	2.78e-146	510	Pseudozyma antarctica T-34;Pseudozyma aphidis DSM 70725
P222|Iso_400|I|SPAC13C5.05c	gi|156062932|ref|XP_001597388.1|	3.03e-146	511	Sclerotinia sclerotiorum 1980 UF-70
P222|Iso_400|I|SPAC13C5.05c	gi|563289916|gb|ESZ90592.1|	3.16e-146	511	Sclerotinia borealis F-4157
P222|Iso_400|I|SPAC13C5.05c	gi|527303068|gb|EPT03847.1|	5.79e-146	505	Fomitopsis pinicola FP-58527 SS1
P222|Iso_400|I|SPAC13C5.05c	gi|667837849|ref|XP_007783093.1|	7.23e-146	512	Coniosporium apollinis CBS 100218
P222|Iso_400|I|SPAC13C5.05c	gi|972531455|gb|KUJ08099.1|	7.82e-146	511	Phialocephala scopiformis
P222|Iso_400|I|SPAC13C5.05c	gi|859270842|emb|CEJ54432.1|	8.61e-146	504	Penicillium brasilianum
P222|Iso_400|I|SPAC13C5.05c	gi|597968795|ref|XP_007360265.1|	9.42e-146	508	Dichomitus squalens LYAD-421 SS1
P222|Iso_400|I|SPAC13C5.05c	gi|299755466|ref|XP_002912105.1|	1.01e-145	505	Coprinopsis cinerea okayama7#130
P222|Iso_400|I|SPAC13C5.05c	gi|673529258|emb|CDI55524.1|	1.09e-145	510	Melanopsichium pennsylvanicum 4
P222|Iso_400|I|SPAC13C5.05c	gi|821505693|gb|KKZ62571.1|	1.6e-145	509	Emmonsia crescens UAMH 3008
P222|Iso_400|I|SPAC13C5.05c	gi|758984065|ref|XP_011391287.1|	1.71e-145	509	Ustilago maydis 521
P222|Iso_400|I|SPAC13C5.05c	gi|388856337|emb|CCF50146.1|	2.19e-145	511	Ustilago hordei
P222|Iso_400|I|SPAC13C5.05c	gi|749769329|gb|KII93758.1|	2.71e-145	507	Plicaturopsis crispa FD-325 SS-3
P222|Iso_400|I|SPAC13C5.05c	gi|914978865|ref|XP_013245823.1|	2.71e-145	509	Tilletiaria anomala UBC 951
P222|Iso_400|I|SPAC13C5.05c	gi|750971773|gb|KIK28580.1|	3.1e-145	508	Pisolithus microcarpus 441
P222|Iso_400|I|SPAC13C5.05c	gi|646309699|gb|KDQ30842.1|	4.14e-145	505	Pleurotus ostreatus PC15
P222|Iso_400|I|SPAC13C5.05c	gi|402217679|gb|EJT97758.1|	6.76e-145	497	Dacryopinax primogenitus
P222|Iso_400|I|SPAC13C5.05c	gi|758360266|emb|CEP17379.1|	1.11e-144	505	Parasitella parasitica
P222|Iso_400|I|SPAC13C5.05c	gi|759217538|gb|KIV94876.1|	1.12e-144	514	Exophiala mesophila
P222|Iso_400|I|SPAC13C5.05c	gi|154284446|ref|XP_001543018.1|	1.35e-144	510	Ajellomyces capsulatus NAm1
P222|Iso_400|I|SPAC13C5.05c	gi|827762427|gb|KLO17033.1|	1.45e-144	507	Schizopora paradoxa
P222|Iso_400|I|SPAC13C5.05c	gi|751736857|gb|KIM85144.1|	1.72e-144	508	Piloderma croceum F 1598
P222|Iso_400|I|SPAC13C5.05c	gi|759231508|gb|KIW08480.1|	2.25e-144	513	Ochroconis gallopava
P222|Iso_400|I|SPAC13C5.05c	gi|816185450|emb|CRG92507.1|	2.39e-144	508	Talaromyces islandicus
P222|Iso_400|I|SPAC13C5.05c	gi|973332130|gb|KUL92021.1|	2.52e-144	513	Talaromyces verruculosus
P222|Iso_400|I|SPAC13C5.05c	gi|955482024|ref|XP_014654072.1|	2.63e-144	510	Pseudozyma antarctica
P222|Iso_400|I|SPAC13C5.05c	gi|808368267|ref|XP_012189478.1|	3.34e-144	509	Pseudozyma hubeiensis SY62
P222|Iso_400|I|SPAC13C5.05c	gi|952547455|dbj|GAQ11176.1|	3.48e-144	506	Aspergillus lentulus
P222|Iso_400|I|SPAC13C5.05c	gi|549049348|emb|CCX11514.1|	3.65e-144	501	Pyronema omphalodes CBS 100304
P222|Iso_400|I|SPAC13C5.05c	gi|595487605|gb|EXX73291.1|	4.09e-144	506	Rhizophagus irregularis DAOM 197198w
P222|Iso_400|I|SPAC13C5.05c	gi|296412801|ref|XP_002836108.1|	4.62e-144	491	Tuber melanosporum;Tuber melanosporum Mel28
P222|Iso_400|I|SPAC13C5.05c	gi|751005762|gb|KIK47847.1|	5.06e-144	508	Suillus luteus UH-Slu-Lm8-n1
P222|Iso_400|I|SPAC13C5.05c	gi|983147056|gb|KWU45019.1|	5.59e-144	517	Rhodotorula sp. JG-1b
P222|Iso_400|I|SPAC13C5.05c	gi|849267947|dbj|GAO89601.1|	7.34e-144	506	Neosartorya udagawae
P222|Iso_400|I|SPAC13C5.05c	gi|748554977|dbj|GAM39654.1|	1.02e-143	513	Talaromyces cellulolyticus
P222|Iso_400|I|SPAC13C5.05c	gi|751684283|gb|KIM34435.1|	1.05e-143	514	Serendipita vermifera MAFF 305830
P222|Iso_400|I|SPAC13C5.05c	gi|552939950|gb|ESA23017.1|	1.86e-143	505	Rhizophagus irregularis DAOM 181602
P222|Iso_400|I|SPAC13C5.05c	gi|212526916|ref|XP_002143615.1|	1.9e-143	513	Talaromyces marneffei ATCC 18224
P222|Iso_400|I|SPAC13C5.05c	gi|663446919|emb|CDR44744.1|	2.51e-143	509	Cyberlindnera fabianii
P222|Iso_400|I|SPAC13C5.05c	gi|807747039|ref|XP_012178314.1|	2.65e-143	505	Fibroporia radiculosa
P222|Iso_400|I|SPAC13C5.05c	gi|679996960|gb|KFX49308.1|	2.68e-143	513	Talaromyces marneffei PM1
P222|Iso_400|I|SPAC13C5.05c	gi|634350480|gb|KDE05734.1|	2.77e-143	508	Microbotryum violaceum p1A1 Lamole
P222|Iso_400|I|SPAC13C5.05c	gi|501751555|emb|CCG84227.1|	4.16e-143	498	Taphrina deformans PYCC 5710
P222|Iso_400|I|SPAC13C5.05c	gi|599160437|gb|EYE99387.1|	5.34e-143	510	Aspergillus ruber CBS 135680
P222|Iso_400|I|SPAC13C5.05c	gi|662508385|gb|KEQ65992.1|	5.55e-143	513	Aureobasidium melanogenum CBS 110374
P222|Iso_400|I|SPAC13C5.05c	gi|961955295|gb|KTB31618.1|	5.61e-143	524	Moniliophthora roreri
P222|Iso_400|I|SPAC13C5.05c	gi|915092595|ref|XP_013284559.1|	6.02e-143	513	Fonsecaea pedrosoi CBS 271.37
P222|Iso_400|I|SPAC13C5.05c	gi|358373395|dbj|GAA89993.1|	8.14e-143	508	Aspergillus kawachii IFO 4308
P222|Iso_400|I|SPAC13C5.05c	gi|662531650|gb|KEQ89023.1|	8.19e-143	515	Aureobasidium pullulans EXF-150
P222|Iso_400|I|SPAC13C5.05c	gi|915686039|ref|XP_013341343.1|	8.83e-143	513	Aureobasidium subglaciale EXF-2481
P222|Iso_400|I|SPAC13C5.05c	gi|302694991|ref|XP_003037174.1|	1.3e-142	504	Schizophyllum commune H4-8
P222|Iso_400|I|SPAC13C5.05c	gi|751184943|gb|KIL70879.1|	1.45e-142	508	Amanita muscaria Koide BX008
P222|Iso_400|I|SPAC13C5.05c	gi|759247346|gb|KIW24014.1|	1.47e-142	513	Cladophialophora immunda
P222|Iso_400|I|SPAC13C5.05c	gi|684160931|ref|XP_009154343.1|	1.7e-142	513	Exophiala dermatitidis NIH/UT8656
P222|Iso_400|I|SPAC13C5.05c	gi|953449813|ref|XP_014568459.1|	1.89e-142	506	Mixia osmundae IAM 14324
P222|Iso_400|I|SPAC13C5.05c	gi|485601614|pdb|4BJU|A	2.16e-142	506	Aspergillus fumigatus
P222|Iso_400|I|SPAC13C5.05c	gi|754378767|gb|KIP11372.1|	2.28e-142	506	Phlebiopsis gigantea 11061_1 CR5-6
P222|Iso_400|I|SPAC13C5.05c	gi|729714009|emb|CEI89685.1|	2.58e-142	506	Rhizopus microsporus
P222|Iso_400|I|SPAC13C5.05c	gi|902269325|emb|CRL27214.1|	2.68e-142	504	Penicillium camemberti
P222|Iso_400|I|SPAC13C5.05c	gi|966763117|dbj|GAQ44415.1|	3.07e-142	508	Aspergillus niger
P222|Iso_400|I|SPAC13C5.05c	gi|734669705|ref|XP_010755900.1|	3.69e-142	510	Paracoccidioides brasiliensis Pb03;Paracoccidioides brasiliensis Pb18
P222|Iso_400|I|SPAC13C5.05c	gi|628243752|ref|XP_007724059.1|	4.07e-142	512	Capronia coronata CBS 617.96
P222|Iso_400|I|SPAC13C5.05c	gi|241950383|ref|XP_002417914.1|	4.69e-142	515	Candida dubliniensis CD36
P222|Iso_400|I|SPAC13C5.05c	gi|727146647|emb|CEG70885.1|	4.88e-142	510	Rhizopus microsporus
P222|Iso_400|I|SPAC13C5.05c	gi|119186963|ref|XP_001244088.1|	5.99e-142	508	Coccidioides immitis RS;Coccidioides immitis RMSCC 2394
P222|Iso_400|I|SPAC13C5.05c	gi|525581430|gb|EPS27680.1|	6e-142	504	Penicillium oxalicum 114-2
[truncated: 47,239 more rows]
